# Supplementary material for: Characterization of a Clinically and Biologically Defined Subgroup of Patients with Autism Spectrum Disorder and Identification of a Tailored Combination Treatment
Source: MDPI journal article supplement (doi:10.3390/biomedicines12050991), 2024-04-30
Supplement: s1 [file s1]

**Supplementary Table S2.** Pathways significantly enriched for genes showing a statistically significant differential expression in ASD-Phen1 vs. ASD-non-Phen1

| GeneSet_DB             | Term                                                                           | Overlap | P-value | Adjusted P-value | Odds Ratio | Genes                  |
|------------------------|--------------------------------------------------------------------------------|---------|---------|------------------|------------|------------------------|
| MsigDB_Hallmark_2020   | TNF-alpha Signaling via NF- $\kappa$ B                                         | 2/200   | 0.004   | 0.017            | 24.99      | <i>BCL2A1; PNRC1</i>   |
| KEGG_2021_Human        | Transcriptional Misregulation in Cancer                                        | 2/192   | 0.004   | 0.024            | 26.05      | <i>BCL2A1; PAX5</i>    |
| Reactome_2022          | MyD88:MAL(TIRAP) Cascade Initiated On Plasma Membrane R-HSA-166058             | 2/112   | 0.001   | 0.026            | 45.18      | <i>S100A12; S100A8</i> |
| Reactome_2022          | Toll Like Receptor 4 (TLR4) Cascade R-HSA-166016                               | 2/140   | 0.002   | 0.026            | 35.96      | <i>S100A12; S100A8</i> |
| Reactome_2022          | Diseases of Base Excision Repair R-HSA-9605308                                 | 1/5     | 0.002   | 0.026            | 555.17     | <i>NEIL3</i>           |
| Reactome_2022          | Toll-like Receptor Cascades R-HSA-168898                                       | 2/162   | 0.003   | 0.026            | 30.98      | <i>S100A12; S100A8</i> |
| Reactome_2022          | RUNX1 Regulates Transcription of Genes Involved in BCR Signaling R-HSA-8939245 | 1/6     | 0.003   | 0.026            | 444.11     | <i>PAX5</i>            |
| Reactome_2022          | Metal Sequestration by Antimicrobial Proteins R-HSA-6799990                    | 1/6     | 0.003   | 0.026            | 444.11     | <i>S100A8</i>          |
| WikiPathway_2021_Human | ID Signaling Pathway WP53                                                      | 1/16    | 0.008   | 0.028            | 147.96     | <i>PAX5</i>            |
| WikiPathway_2021_Human | Regulation of Apoptosis by Parathyroid Hormone-Related Protein WP3872          | 1/22    | 0.011   | 0.028            | 105.66     | <i>BCL2A1</i>          |
| WikiPathway_2021_Human | Base Excision Repair WP4752                                                    | 1/31    | 0.015   | 0.028            | 73.93      | <i>NEIL3</i>           |

|                        |                                                                          |      |       |       |        |                |
|------------------------|--------------------------------------------------------------------------|------|-------|-------|--------|----------------|
| WikiPathway_2021_Human | Prion disease pathway<br>WP3995                                          | 1/33 | 0.016 | 0.028 | 69.30  | <i>PAX5</i>    |
| WikiPathway_2021_Human | Photodynamic Therapy-<br>Induced NF-κB Survival<br>Signaling WP3617      | 1/35 | 0.017 | 0.028 | 65.22  | <i>BCL2A1</i>  |
| WikiPathway_2021_Human | Photodynamic Therapy-<br>Induced HIF-1 Survival<br>Signaling WP3614      | 1/37 | 0.018 | 0.028 | 61.59  | <i>BCL2A1</i>  |
| Reactome_2022          | Advanced Glycosylation<br>Endproduct Receptor<br>Signaling R-HSA-879415  | 1/13 | 0.006 | 0.045 | 184.98 | <i>S100A12</i> |
| Reactome_2022          | MyD88 Deficiency (TLR2/4)<br>R-HSA-5602498                               | 1/17 | 0.008 | 0.045 | 138.71 | <i>S100A8</i>  |
| Reactome_2022          | Regulation Of TLR By<br>Endogenous Ligand R-HSA-<br>5686938              | 1/18 | 0.009 | 0.045 | 130.54 | <i>S100A8</i>  |
| Reactome_2022          | IRAK4 Deficiency (TLR2/4)<br>R-HSA-5603041                               | 1/18 | 0.009 | 0.045 | 130.54 | <i>S100A8</i>  |
| Reactome_2022          | Nuclear Events Stimulated<br>By ALK Signaling In Cancer<br>R-HSA-9725371 | 1/19 | 0.009 | 0.045 | 123.28 | <i>BCL2A1</i>  |
| KEGG_2021_Human        | Base Excision Repair                                                     | 1/33 | 0.016 | 0.049 | 69.30  | <i>NEIL3</i>   |
| Reactome_2022          | RHO GTPases Activate<br>NADPH Oxidases R-HSA-<br>5668599                 | 1/24 | 0.012 | 0.050 | 96.46  | <i>S100A8</i>  |
| Reactome_2022          | TRAF6-Mediated NF-κB<br>Activation R-HSA-933542                          | 1/25 | 0.012 | 0.050 | 92.44  | <i>S100A12</i> |
