# Supplementary material for: Characterization of a Clinically and Biologically Defined Subgroup of Patients with Autism Spectrum Disorder and Identification of a Tailored Combination Treatment
Source: MDPI journal article supplement (doi:10.3390/biomedicines12050991), 2024-04-30
Supplement: s1 [file s1]

**Supplementary Table S1.** Demographic data of ASD-Phenotype1, ASD-non-Phenotype1 and typically developing study participants

| Participant | Gender | Head circumference (HC) percentile | Systematic aggravation of ASD behavioral symptoms (flares), during episodes of immune challenges such as fever and infection events                                                                                   | Age of participants at time of blood draw for LCLs (y.) | Biolog data (Y/N) | RNA profiling (Y/N) | Age of participants at time of blood draw for RNA-seq (y.) | Drug profiling in LCLs (Y(N) | ASD subgroups or TD |
|-------------|--------|------------------------------------|-----------------------------------------------------------------------------------------------------------------------------------------------------------------------------------------------------------------------|---------------------------------------------------------|-------------------|---------------------|------------------------------------------------------------|------------------------------|---------------------|
| STPT000247  | M      | 99                                 | Improves with mild illness, worsens with severe, skin can be hot to touch but normal temp. Severe hives with illness. Mom states "massive insult with regression at 30 months and appeared to be related to illness". | 10                                                      | Y                 | Y                   | 10                                                         | Y                            | ASD-Phen1           |
| STPT000248  | M      | >75                                | Behaviors worsen, speech regression with illness.                                                                                                                                                                     | 7                                                       | Y                 | Y                   | 13                                                         | Y                            | ASD-Phen1           |
| STPT000239  | M      | 75                                 | Worsens, does not want to talk, behaviors worsen.                                                                                                                                                                     | 27                                                      | Y                 | Y                   | 27                                                         | N                            | ASD-Phen1           |

|            |   |     |                                                                                                                            |    |   |   |    |   |           |
|------------|---|-----|----------------------------------------------------------------------------------------------------------------------------|----|---|---|----|---|-----------|
|            |   |     | Parents know he is sick due to these changes.                                                                              |    |   |   |    |   |           |
| STPT000298 | M | 90  | Behavioral issues worsen significantly with illness. Regression at 15 months but cannot recall a specific illness.         | 2  | Y | Y | 4  | N | ASD-Phen1 |
| STPT000281 | M | 89  | Behavior worsens drastically with illness and fever, aggression, he is nonverbal, so speech is not affected.               | 2  | Y | Y | 6  | N | ASD-Phen1 |
| STPT000261 | M | 95  | Behaviors worsen with illness, very irritable, less communication.                                                         | 13 | Y | Y | 18 | N | ASD-Phen1 |
| STPT000289 | M | >97 | ASD symptoms worsen with illness, drastic change (parents can tell when he is getting sick by the shift in behaviors) less | 7  | Y | Y | 10 | N | ASD-Phen1 |

|            |   |    |                                                                                                                                                             |   |   |   |    |   |           |
|------------|---|----|-------------------------------------------------------------------------------------------------------------------------------------------------------------|---|---|---|----|---|-----------|
|            |   |    | communication when sick.                                                                                                                                    |   |   |   |    |   |           |
| STPT000274 | M | 90 | ASD symptoms worsen with illness, he has confusion and fogginess, becomes more isolated. High fevers and facial flushing.                                   | 6 | Y | Y | 10 | N | ASD-Phen1 |
| STPT000258 | M | 89 | Speech regression with illness (limited to sounds) "shuts down". School checks temps due to hot to the touch, but has normal temps. "red ears with illness" | 3 | Y | N | NA | N | ASD-Phen1 |
| STPT000256 | M | 82 | Worsens with illness and fever, no sounds, sensory overload, gets "real hot and flushed"                                                                    | 5 | Y | N | NA | N | ASD-Phen1 |

|            |   |    |                                                                                                                                                                                                                                                |   |   |   |    |   |           |
|------------|---|----|------------------------------------------------------------------------------------------------------------------------------------------------------------------------------------------------------------------------------------------------|---|---|---|----|---|-----------|
| STPT000257 | M | 84 | Communication regression with illness. He is not sick often per mom.                                                                                                                                                                           | 6 | Y | N | NA | N | ASD-Phen1 |
| STPT000280 | M | 88 | Hypersensitive, fixated, emotional disturbances when sick.                                                                                                                                                                                     | 5 | Y | N | NA | N | ASD-Phen1 |
| STPT000263 | M | 95 | Social intolerance during illness. At 2 years old had a significant viral illness that affected his hips. Was evaluated at MUSC where the MD indicated it was a virus that caused the orthopedic presentation. ASD dx wasn't made until age 7. | 6 | Y | N | NA | N | ASD-Phen1 |
| STPT000283 | M | 85 | Symptoms worsen with illness, moody, frustrates easily, whiny.                                                                                                                                                                                 | 9 | Y | N | NA | N | ASD-Phen1 |

|            |   |       |                                                                                                                                                                                               |    |   |   |    |   |           |
|------------|---|-------|-----------------------------------------------------------------------------------------------------------------------------------------------------------------------------------------------|----|---|---|----|---|-----------|
| STPT000284 | M | >95   | Fatigued, irritable, less interactive, same applies when loss of a tooth.                                                                                                                     | 4  | Y | N | NA | N | ASD-Phen1 |
| STPT000253 | F | >97   | Symptoms worsen with illness: aggressive, insomnia, fear and anxiety, inability to focus, less communication when sick. Parents can tell when she is getting sick due to changes in behavior. | 1  | Y | N | NA | N | ASD-Phen1 |
| STPT000246 | F | 90-95 | Symptoms worsen with illness. Irritability, hostility.                                                                                                                                        | 5  | Y | N | NA | N | ASD-Phen1 |
| STPT000254 | M | >75   | High temps when sick and sound sensitivity. He had several dental abscesses and his symptoms worsened significantly.                                                                          | 16 | N | Y | 22 | N | ASD-Phen1 |

|            |   |      |                                                                                                                                                                                |    |   |   |    |   |               |
|------------|---|------|--------------------------------------------------------------------------------------------------------------------------------------------------------------------------------|----|---|---|----|---|---------------|
| STPT000266 | M | > 97 | Behaviors worsen, speech regression with illness. Rigid, controlling, and angry when sick.                                                                                     | 15 | N | Y | 21 | N | ASD-Phen1     |
| STPT000260 | M | 90   | Yes, at 12-24 months ran fevers of unknown origin as high as 103 and he was nonverbal at the time. He was diagnosed at 3 with ASD. He hasn't been sick since he was 24 months. | 6  | N | N | NA | N | ASD-Phen1     |
| STPT000304 | M | 3    | NA*                                                                                                                                                                            | 10 | Y | Y | 13 | N | ASD-non-Phen1 |
| STPT000315 | M | 3    | NA*                                                                                                                                                                            | 8  | Y | Y | 10 | N | ASD-non-Phen1 |
| STPT000320 | M | 4    | NA*                                                                                                                                                                            | 2  | Y | Y | 4  | N | ASD-non-Phen1 |
| STPT000288 | M | 53   | NA*                                                                                                                                                                            | 6  | Y | Y | 9  | N | ASD-non-Phen1 |
| STPT000314 | M | 25   | NA*                                                                                                                                                                            | 6  | Y | Y | 8  | N | ASD-non-Phen1 |
| STPT000317 | M | 40   | NA*                                                                                                                                                                            | 2  | Y | Y | 4  | N | ASD-non-Phen1 |
| STPT000297 | M | 45   | NA*                                                                                                                                                                            | 5  | Y | Y | 6  | N | ASD-non-Phen1 |
| STPT000291 | M | 67   | NA*                                                                                                                                                                            | 3  | Y | Y | 5  | N | ASD-non-Phen1 |
| STPT000245 | M | 68   | NA*                                                                                                                                                                            | 4  | Y | Y | 10 | N | ASD-non-Phen1 |

|            |   |     |     |    |   |   |    |   |               |
|------------|---|-----|-----|----|---|---|----|---|---------------|
| STPT000240 | F | 3   | NA* | 19 | Y | Y | 21 | N | ASD-non-Phen1 |
| STPT000309 | M | 5   | NA* | 6  | Y | N | NA | N | ASD-non-Phen1 |
| STPT000244 | M | 20  | NA* | 7  | Y | N | NA | N | ASD-non-Phen1 |
| STPT000319 | M | 25  | NA* | 4  | Y | N | NA | N | ASD-non-Phen1 |
| STPT000241 | M | 30  | NA* | 6  | Y | N | NA | N | ASD-non-Phen1 |
| STPT000322 | M | 40  | NA* | 2  | Y | N | NA | N | ASD-non-Phen1 |
| STPT000318 | M | <3% | NA* | 4  | Y | N | NA | N | ASD-non-Phen1 |
| STPT000316 | M | 55  | NA* | 2  | Y | N | NA | N | ASD-non-Phen1 |
| STPT000324 | M | 57  | NA* | 5  | Y | N | NA | N | ASD-non-Phen1 |
| STPT000290 | M | 60  | NA* | 10 | Y | N | NA | N | ASD-non-Phen1 |
| STPT000285 | F | NA  | NA  | 3  | Y | N | NA | N | TD            |
| STPT000286 | M | NA  | NA  | 6  | Y | N | NA | N | TD            |
| STPT000292 | F | NA  | NA  | 7  | Y | N | NA | N | TD            |
| STPT000293 | M | NA  | NA  | 4  | Y | N | NA | N | TD            |
| STPT000294 | M | NA  | NA  | 4  | Y | N | NA | N | TD            |
| STPT000295 | M | NA  | NA  | 5  | Y | N | NA | N | TD            |
| STPT000296 | M | NA  | NA  | 5  | Y | N | NA | N | TD            |
| STPT000299 | M | NA  | NA  | 6  | Y | N | NA | N | TD            |
| STPT000300 | M | NA  | NA  | 5  | Y | N | NA | N | TD            |
| STPT000301 | M | NA  | NA  | 5  | Y | N | NA | N | TD            |

|            |   |    |    |   |   |   |    |   |    |
|------------|---|----|----|---|---|---|----|---|----|
| STPT000302 | M | NA | NA | 7 | Y | N | NA | N | TD |
| STPT000303 | M | NA | NA | 6 | Y | N | NA | N | TD |
| STPT000305 | F | NA | NA | 6 | Y | N | NA | N | TD |
| STPT000306 | M | NA | NA | 5 | Y | N | NA | N | TD |
| STPT000307 | F | NA | NA | 3 | Y | N | NA | N | TD |
| STPT000308 | M | NA | NA | 3 | Y | N | NA | N | TD |
| STPT000310 | M | NA | NA | 7 | Y | N | NA | N | TD |
| STPT000311 | M | NA | NA | 3 | Y | N | NA | N | TD |
| STPT000312 | F | NA | NA | 8 | Y | N | NA | N | TD |
| STPT000313 | M | NA | NA | 3 | Y | N | NA | N | TD |

\*ASD-non-Phen1 patients were selected among patients with idiopathic ASD with a HC < 75th percentile. No further assessments were made on these patients.
