# Supplementary material for: Characterization of a Clinically and Biologically Defined Subgroup of Patients with Autism Spectrum Disorder and Identification of a Tailored Combination Treatment
Source: Biomedicines. 2024 Apr 30;12(5):991. doi: 10.3390/biomedicines12050991 (PMC11117897; doi:10.3390/biomedicines12050991)
Supplement: Supplementary file 1 [file biomedicines-12-00991-s001.zip › Supplementary Table S3.xlsx]

## Sheet: gsea results
pathway	pval	padj	log2err	ES	NES	size	leadingEdge	NF-KB related pathways
ABBUD_LIF_SIGNALING_1_DN	0.252874	0.659493	0.10714	0.46012	1.19458	18	KLRB1 CYFIP1 PELI1 HK2 MTSS2 OSTF1 ALCAM AHNAK	NO
ABBUD_LIF_SIGNALING_1_UP	0.0247177	0.216648	0.352488	0.519292	1.5542	34	LCN2 KLF10 NMI SOCS3 RNASE2 IL1R1 BCL3 LRG1 RHOU CEBPB TMEM176A GPCPD1 ACAA2 TNFRSF1A PSMB8 SQOR TMEM176B	NO
ABDELMOHSEN_ELAVL4_TARGETS	0.717822	0.960817	0.052057	0.32342	0.814894	15	CASP3 ITGA1 CDC42 RAB10 ITGB1 RHOA KMT5A CAB39 NCAM1	NO
ABE_INNER_EAR	0.348837	0.752558	0.0847985	0.386436	1.09653	27	RPL21 RPL35 VAMP5 FBXO2 LRP1 RPS11 LHFPL6	NO
ABE_VEGFA_TARGETS_2HR	0.560897	0.883673	0.062249	0.34239	0.932149	23	PLPP3 BPI PTGS2 RCAN1 CDKN1A EIF1 PRKCD TNFRSF14 XPO7 UPP1 CUX1 TKTL1 HERPUD1 PPL	NO
ABE_VEGFA_TARGETS_30MIN	0.989899	1	0.0382417	0.180617	0.457347	16	PTGS2 RCAN1 GZMK KRAS TKTL1 MYO7A HBEGF C2 ALAD	NO
ABRAHAM_ALPC_VS_MULTIPLE_MYELOMA_DN	0.253659	0.659701	0.106323	0.44732	1.17736	19	XRCC4 TXN PTEN CDK5 CASP3 PSEN1 CDK4	NO
ABRAHAM_ALPC_VS_MULTIPLE_MYELOMA_UP	0.350565	0.753474	0.086795	0.410042	1.09456	21	IGFBP3 FAS SERPINA1 CD36 BCL6 TNFRSF1A RARA	NO
ABRAMSON_INTERACT_WITH_AIRE	0.892405	1	0.0728939	-0.206782	-0.744852	42	MYBBP1A MCM2 TRIM28 PARP1 GCN1 SMC1A RUVBL2 PRKDC NOP56 MCM5	NO
ACEVEDO_LIVER_CANCER_DN	0.588424	0.901203	0.0414044	0.23319	0.964088	411	PLSCR4 C3 MYO10 IGFBP3 RAP1GAP HBA1 TPT1 ORM1 CYP4F22 GLRX5 PPARGC1A ADM STAB1 HSD3B7 PLEK2 PHLDA1 ALPL F12 IGF2 KYNU PTMS ARG1 PSMA2 HSBP1 UBXN6 ASGR1 SLC35A1 CSRNP1 DNAJA1 SLC22A1 PCMT1 ENKD1 PRKAG2 ITIH1 CXCL16 SERPINF2 C5 IDNK CPEB3 SDC4 GTF2E2 SLC6A12 OAT ETS2 CHST7 AIG1 CTSB RDH5 ARL6IP1 IER3 PAM16 MRM3 NADK MPC1 LYRM1 ATP6V1B2 DGAT2 TRIP6 MT1X RGL1 NCOA4 SEC14L4 FOS EIF2AK1 CACNA1H ZFP36 T…	YES
ACEVEDO_LIVER_CANCER_WITH_H3K27ME3_DN	0.0545455	0.316267	0.21925	0.375223	1.36403	101	SATB2 ATP23 PCDHGC3 NPRL3 STK32B LGALS3 MRPL1 DTNA PCDHGB3 KIAA0895 PCDHGB5 NMI PCDHGB4 PCDHGA10 CMTM2 POMP ANLN CCDC81 NBPF14 FSIP1 ANKRD12 ZNF461 GOLT1B PCDHGA9 APOL2 CHST15 TSHZ2 ZFHX3 PRPF39 PLP2 DHRS7 SCFD1 LYST	NO
ACEVEDO_LIVER_CANCER_WITH_H3K27ME3_UP	0.00048149	0.0152158	0.498493	0.430408	1.63682	153	LPAR3 CRISP3 MMP8 TOMM7 KL RTL5 COLEC12 DLC1 FZD1 ST18 YBX3 CR1L TLR8 MBOAT2 TMEM144 SEMA3C ADGRV1 SLC1A3 CLEC12A HSBP1 GABARAPL2 CLEC7A LMO2 KDM4D TLR2 SPIRE1 PLBD1 PALLD C7orf31 CREB5 LYSMD2 KLRK1 RHAG C1GALT1C1 MPP1 DCUN1D5 OAT CXCL1	NO
ACEVEDO_LIVER_CANCER_WITH_H3K9ME3_DN	0.354707	0.756802	0.0770737	0.31231	1.07403	67	HAT1 POLE2 SLC26A8 NUSAP1 ISL2 CFH KIF20B DYSF MYBL1 OSBPL1A ZNF613 C4orf33 TBC1D31 BMX PTPN22 USP39 TMEM237 NCF2 HMGN4 VSTM1	NO
ACEVEDO_LIVER_CANCER_WITH_H3K9ME3_UP	0.00697522	0.0997069	0.407018	0.463262	1.60146	69	LPAR3 GALNT5 CA1 ABCA13 NRXN3 NAP1L2 VCAN SIPA1L2 IGSF11 SPATA6 CLIC1 TLR2 PLBD1 MGAM LINC00907 ZC2HC1A TNFSF13 LRRN1 KLHL2 OTULINL MITF MME MS4A3 KRT10 FYB1 TMEM192 AMOTL1 IRF2 ZDBF2 RARA ARHGAP18	NO
ACEVEDO_LIVER_TUMOR_VS_NORMAL_ADJACENT_TISSUE_DN	0.473246	0.835501	0.0561767	0.255079	0.999883	195	C3 MYO10 IGFBP3 RAP1GAP DNASE1L3 PPARGC1A KRCC1 STAB1 F12 IGF2 ARG1 SLC25A37 RAB33B HSBP1 SPIRE1 RGS2 CSRNP1 TNFRSF21 SLC22A1 PCMT1 CD68 PPIG AXL ETS2 CHST7 AIG1 VAMP8 GSDME IER3 LYRM1 ATP6V1B2 DGAT2 TRIP6 MT1X	NO
ACEVEDO_METHYLATED_IN_LIVER_CANCER_DN	0.0439443	0.288779	0.222056	0.295992	1.22593	433	LPAR3 HMGN5 HERC5 MYO10 TKTL2 C1QB PEG3 CA1 DBI OLFM4 NTNG2 SV2B IL1B CC2D2B NME8 SLC8A1 UMODL1 SORCS3 STK32B DYNC2LI1 SH3PXD2B ERRFI1 ST18 FFAR2 CES1 TIAM2 ACSL1 SIPA1L2 MBOAT2 FCGR1A ADGRV1 TDRD1 F2R ZCCHC2 PRR13 FCGR2A SRGN RGS18 DISC1 ZNF595 FOXO3 SERPINA1 NGDN EPS8L1 CCDC7 SPIRE1 CLEC12B SCAMP4 HCAR2 TDRD9 ZNF804A UBE2D1 ADAT3 DYNLT1 SBF2 NAGS ABCA11P GIMAP7 LPCAT2 NDUFA2 H19 DNAJC3 CD1D TSP…	NO
ACEVEDO_NORMAL_TISSUE_ADJACENT_TO_LIVER_TUMOR_DN	0.903509	1	0.135002	-0.182124	-0.87537	293	GPT2 UPB1 ALDH7A1 GNMT NOCT ZFPM1 BPHL ATP6V0E2 AKR7A3 FITM1 HAAO DHRS1 RDH16 MAMDC4 IGFBP4 MYOM1 PHGDH MYDGF FASN SHMT1 CPSF1 SPTAN1 TRAPPC6A AGMAT CBX7 CYB561A3 EVL MYOM2 TBC1D16 LONP1 VAV2 EEF2K SREBF2 DECR2 BCO2 PYROXD2 BOK CLPP ZNF511 MEPCE ABHD14B IMP4 ZCCHC14 TM7SF2 FKBP4 MXD4 CADM1 MRPS31 SAMD4A TRRAP LDLR MAPRE2 TEF FN3KRP SHMT2 REEP6 SLC25A15 SLC25A1	NO
ACEVEDO_NORMAL_TISSUE_ADJACENT_TO_LIVER_TUMOR_UP	0.00540417	0.0846684	0.407018	0.401744	1.50987	141	RPL23 RPL7 SLPI LY96 RPS3A GMFG SORT1 MARCKS UQCRH SBDS TDRD1 RAB33B FBXO2 PIK3AP1 SPIRE1 RGS2 ERGIC2 IGSF6 MICU2 BLVRB ZFP36L1 ARPC5 PCMTD1 HNRNPH3 WSB2 C4orf33 ZNF14 CYP51A1 NTAN1 GORASP1 ZNF721 ACSL4 FKBP5 RPL27A IGBP1 CTSO ITGAV PTGES3 ELOVL5 GNA13 SUMO2 FAM200A HMGN4 DCTN4 PCTP CHD1 UBE2V2 IFT74 F11R IMPA1 TRIP12 MINDY3 HHEX TBPL1 ALCAM PTMA HLA-B SESN1 HDAC2 SCYL2 ACTR3 RMDN1 COX14	NO
ACOSTA_PROLIFERATION_INDEPENDENT_MYC_TARGETS_DN	0.0337662	0.260409	0.282013	0.384108	1.39894	102	HBB BCAM AIF1 AKR1C1 ARL4A RHCE GYPB TNNT1 ADAMTSL4 RHD KYNU CLEC11A ALAS2 LMO2 SAMSN1 CMTM6 CARD9 MPP1 S100A11 SLC2A3 SELENBP1 JUNB RIT1 UGP2 NAGA CD63 NFE2 RHOG GDE1 KRT10 GATA1 SEC24D KLF6 MCL1	NO
ACOSTA_PROLIFERATION_INDEPENDENT_MYC_TARGETS_UP	0.963235	1	0.0766747	-0.181223	-0.722097	77	CCNE1 TMEM161A FBXO41 PTK7 CD320 NUP210 PARP1 DHCR7 PRPF19 REPIN1 SLC29A1 PEX5 OXCT1 WDR74 HDHD5 GCDH PDCD11 ZNF395 RRP1B EIF4A3 SLC5A3 SLC39A4 EMC1 RAB3A	NO
ADDYA_ERYTHROID_DIFFERENTIATION_BY_HEMIN	0.0452439	0.292612	0.321776	0.427314	1.46369	66	HBA1 SLC2A14 FECH GYPA AKR1C1 NPRL3 ATF3 FCGR2A LMO2 DNAJB4 TAX1BP1 NQO1 CEBPB CTSL CTSH FTH1 IER3 TXNIP RTN4 NPL MYB KLF6 INSIG1 MCL1 SLC43A3 TXNRD1 KLF1 CEBPG ADAM10 NCOA1 SLC27A2 RPP25	NO
AFFAR_YY1_TARGETS_DN	0.256983	0.661022	0.208955	-0.236841	-1.0805	186	RAB3C FN3K RIPK4 KIF2C BIRC5 MYO1B LEP PLK1 CCNB2 MYCBPAP CDCA3 TRIP13 BUB1 ALOX15B COL6A3 SPA17 CDC6 PER3 CENPF EXO1 UHRF1 KIF20A AXIN2 MKI67 B3GAT3 PLK4 SCARB1 CCNA2	NO
AFFAR_YY1_TARGETS_UP	0.698163	0.951305	0.0428451	0.243422	0.889044	108	PRSS35 HEMGN KLRB1 ARL17B SLC27A3 FAS GBP6 PMAIP1 ABCA1 ICAM1 TAP1 DUSP1 ADAM15 ITGA9 STX3 ST6GALNAC3 GBP2 TXNIP SH2D1A PLOD2 SPAG1 BEX2 FOS S1PR5 GFER CDKN1C FYB1 SRC LAMB2 CDKN1A ZNF385A NAP1L3 WNT16 PFKFB2 POLK ALCAM PPP1R15A MDM2 SYT11 TGM2 TPM1	NO
AGUIRRE_PANCREATIC_CANCER_COPY_NUMBER_DN	0.588511	0.901203	0.0454968	0.241604	0.951162	213	PFDN5 NRG1 LSM3 RBFOX2 ALPL YEATS4 TBK1 TWF1 PDCD1LG2 RPS6 SOCS6 DUSP6 SNX3 DCTN6 CCDC59 DMC1 GNS WASF1 GTF2E2 NAT1 FBXW7 PLGRKT PHC2 UBXN8 RNF19B C12orf29 ELOB TXN2 ATP6V1B2 PDGFB ATG5 BLOC1S1 CD63 RANBP6 APOL2 AMD1 CCT2 HAUS6 DAZAP2 IRF2 RAP1B TMBIM4 PISD BTG1 MAP3K5 SLC48A1 SUMO3 TRNAU1AP ATP6V0C CD164 NFIB PRKAG1 RSRP1 HMGN2 FKBP11 KLHL9 ISOC1 EXTL3 RAB36 GALE GTPBP1 C6orf120 PPP1R12A FIG4 HD…	NO
AGUIRRE_PANCREATIC_CANCER_COPY_NUMBER_UP	1	1	0.0172343	0.143675	0.576908	260	DOCK4 PDK4 MYL6 RABGEF1 MPP3 RIOK3 RPL27 SNAPC1 ARL17A SNRPD2 LSM1 C5AR1 MRPL13 SLC1A5 DUSP3 CMAS OSBPL1A ATP5F1E SNX6 SHARPIN GRN CDC27 EAPP ACTR10 NAPA NDUFS6 KPNB1 SDHAF3 TBC1D31 PPP1R3D RNF139 BAG4 KRT10 KTN1 TMEM8B DLD KDELR1 PCTP HIF1A RPS9 SCFD1 HLF NPEPPS SLC12A9 MBOAT7 RPL13A PDCD6 PRELID3B TSEN34 GSDMD TPD52L2 PARP4 FAM117A CDKN2A DERL1 OSBPL2 ARPC1A SIRT2 ARHGAP5 DGAT1 NUCB1 UTP18 GNB2…	NO
AIGNER_ZEB1_TARGETS	0.725203	0.964221	0.0509083	0.307911	0.810432	19	DSC2 TACSTD2 MARVELD2 CDH1	NO
AIYAR_COBRA1_TARGETS_DN	0.99679	1	0.0356933	0.175303	0.48134	24	HPRT1 BAG1 APIP SLC20A1	NO
AIYAR_COBRA1_TARGETS_UP	0.658263	0.936737	0.0824344	-0.276776	-0.884523	27	ENAH NEK2 TPBG	NO
AKL_HTLV1_INFECTION_DN	0.0188589	0.187662	0.352488	0.466895	1.5648	60	GZMA PRUNE2 MAOA RPIA ANXA1 HOPX RWDD1 ATP5MG GPR65 GZMB DUSP6 CDH1 YPEL5 PTGS2 SERP1 CCNC SERINC1 IGFBP7 GPR171 VAPA ADGRE1 PECAM1 UBE2J1 DNAJB6 UFL1 ITGB1 DNAJC15 CD86 CPVL	NO
AKL_HTLV1_INFECTION_UP	0.451163	0.824279	0.0713053	0.358211	1.01644	27	SAT1 LGALS3 VAMP8 GSDME HSD17B8 LGALS1 SQOR CTNNA1 ECI2	NO
ALCALAY_AML_BY_NPM1_LOCALIZATION_DN	0.149171	0.505358	0.276501	-0.252092	-1.1307	170	CDC20 KIF2C BIRC5 RRM2 UBE2C GAMT CCNB2 ITM2C ASB9 KIFC1 CCNF MECR CIITA HAAO CDC6 PTTG1 CD38 CDKN3 EXO1 MCM2 POLD1 BANK1 GNG7 MKI67 NUP210 CCNA2 MCM10 SIDT1 EVL CHEK1 KIF4A GPA33 MCM4 MTHFD1	NO
ALCALAY_AML_BY_NPM1_LOCALIZATION_UP	0.154345	0.513859	0.124434	0.328084	1.19637	104	FOXC1 FAM110B RTL8C DSC2 C3AR1 CFH TCEAL9 HNMT EPB41L3 WDFY3 TLR4 RTL8A ZCCHC2 SPATA6 SNX10 ABCC6 TANK UGGT2 ASPH PDGFD CAVIN2 SMPDL3A NFE2L3 ATP6V1B2	NO
ALCALA_APOPTOSIS	0.595109	0.905649	0.0517405	0.262639	0.930794	85	BNIP3L CASP1 FAS ATP5MG SAMSN1 GZMB TIMM17A RALB FAM104A CASP4 RTN3 RIT1 CD48 EEF1A1 RIPK3 AURKA CEBPZ TMEM106C UBE2R2 ARL6IP5 TALDO1 APH1B RHOA UBXN4 FES TOMM20 HSPA8 HMGN1 HCCS BAX DENND1A RPL10A ELOVL1 HADHA ATP5F1B GAPDH COX4I1 SCCPDH	NO
ALFANO_MYC_TARGETS	0.691765	0.949181	0.0382417	0.228425	0.897393	199	SLPI RSL24D1 MAP1B RAP1GAP TCF7L2 MYL6 ADM ANXA1 MARCKS PHLDA1 MXI1 STOM CCNA1 SNRPD1 CDC42EP3 GAS6 NPC2 SDC4 ARPC5 B4GAT1 CD1D PLAUR CD59 PICALM FLOT1 RASSF4 LAPTM4A ARL6IP1 EEF1A1 PTPN12 PPIF KCTD12 TRIP6 XK CLK1 KIAA0930 SLC20A1 MME CDKN1C TIMP2 MYL12A	NO
ALONSO_METASTASIS_DN	0.300254	0.707217	0.125033	-0.385069	-1.11002	18	OLIG2 PCDH9 ACKR2 RGPD1 TCOF1	NO
ALONSO_METASTASIS_EMT_UP	0.817054	0.99833	0.0432769	0.267601	0.759328	27	FZD1 VCAN CX3CR1 ANLN TUBA1A CTSB CD63 ITGAV	NO
ALONSO_METASTASIS_UP	0.000908995	0.02419	0.477271	0.409869	1.57612	171	CASP5 NDUFB3 RPL35A FZD1 VCAN UBL5 TCEAL9 VBP1 EPB41L3 KLF10 IFITM2 CDYL PRDX5 LHFPL2 GON7 SUB1 PMP22 CX3CR1 ANLN NPC2 BTF3 LAMTOR5 DHRS11 EIF1B TUBA1A MRPS22 CTSB LAPTM4A DUSP12 RNASE4 TMEM9B RPS10 FAM114A1 NDUFAB1 CHCHD1 RCBTB2 CD63 NCOA4 ELOC TIMM10 GABARAP SERINC1 MYB ACADM TMCO1 DCAF13 ITGAV BZW1 ACSL3 AKT1S1 PRKAR1A TMBIM4 TMEM50B CDKN1A AK4 TXNRD1 MMGT1 BRK1 ALDH1A2 GLO1 CHCHD2 ATP6V0B SKP…	NO
ALTEMEIER_RESPONSE_TO_LPS_WITH_MECHANICAL_VENTILATION	6.4194e-13	3.99484e-10	0.921426	0.669895	2.42533	99	BCL2A1 IL4I1 IL1RN GEM ARG2 CLEC4D ISG15 IL1B ADM ATF3 NFIL3 IL15 VCAN IFIT1B FPR2 FCGR1A LILRB3 MS4A6A TREX1 CXCL10 SOCS3 FCGR2A CCR1 PFKFB3 C5AR1 STAT1 SAP30 GK MEFV IL1R2 FGL2 CYBB BCL3 TLR2 PLEK GPR65 CCRL2 CD14 HCAR2 FCER1G MXD1 OAS3 CLEC4E PLAUR BST1 CSF2RB PLA2G7 JUNB CLEC6A LITAF RDH5 TIFA SLFN12 NFKBIZ SLC15A3 GBP2 CSF3R CCR2 SLA CEBPD TNFAIP3 CCL4 NFKBIA LST1 ITGAM TNFAIP2 RCAN1	YES
AMBROSINI_FLAVOPIRIDOL_TREATMENT_TP53	0.0424562	0.284866	0.321776	-0.327041	-1.33672	89	CCDC85C PEG10 CCN2 GNA11 SCAMP5 TCAP IL21R OLFML2A RAD51 TFCP2L1 PASK KHK ATP2A3 B3GAT3 LRP6 ZNF337 ABHD8 CCDC92 DGKA BIN1 ACACB HSPB1	NO
AMIT_DELAYED_EARLY_GENES	0.23064	0.627474	0.114751	0.476097	1.20554	16	ATF3 KLF10 ZFP36L1 JUNB ZFP36 RBMS1 KLF6 FOSL2	NO
AMIT_EGF_RESPONSE_120_HELA	0.653901	0.933382	0.049391	0.267515	0.885729	55	GEM SAT1 BIRC2 CYP1B1 DUSP6 PLAUR CXCL1 CDC27 LAT2 MCL1 CDKN1A MAP2K3 GADD45A IRS2 CDC42EP2 ARPC4 UBXN4 NAP1L1 ARRB1 TGFA NDEL1 BCL10 ZFP36L2	NO
AMIT_EGF_RESPONSE_120_MCF10A	0.162651	0.528663	0.131458	0.431632	1.26374	31	IL1B NSUN3 DUSP6 DYNC1LI1 AP1S1 PLAUR MRGBP TRIM21 TXNRD1 EIF1 PDLIM5 APOO SDHAF1 LSM4 NAP1L1 BAX ING2 BCL10	NO
AMIT_EGF_RESPONSE_240_HELA	0.931983	1	0.0339724	0.211239	0.688389	51	PLPP3 PLK2 BCL3 RGS2 SDC4 CD55 SPRED2 TNFRSF1A RBMS1 CDK17 TXNRD1 TOP1 PDLIM5 EHBP1L1 SLC7A11	NO
AMIT_EGF_RESPONSE_240_MCF10A	0.761905	0.981186	0.049094	0.299895	0.778597	18	TNFRSF12A ITSN1 MICAL2 INSIG1 PTAFR SLC7A11 TGFA GABPB1 HERPUD1	NO
AMIT_EGF_RESPONSE_40_HELA	0.338415	0.742951	0.0855357	0.362581	1.09573	36	ATF3 CCNA1 BCL3 CEBPB SLC2A3 DUSP1 JUNB PTGS2 IER3 ZFP36 KLF6 NFIB CCNL1 PPP1R15A ATL2 PIAS1 RNF141 IER2 MBNL1 BTG2	NO
AMIT_EGF_RESPONSE_40_MCF10A	0.240924	0.64411	0.110565	0.47672	1.20115	15	ADM GNS UNC93B1 HSDL2 NDUFB6 FOS ZFP36 MIS18BP1 KLF6	NO
AMIT_EGF_RESPONSE_480_HELA	0.159624	0.523242	0.245042	-0.262429	-1.14371	137	SORBS3 BCAR3 COL4A1 TPBG MTA1 SMTN SERPINE1 CCND1 PMEPA1 IGFBP4 AGRN ITPR3 PLEC SPOUT1 ARHGEF18 RRP1 PLAU MAD1L1 PPDPF SERPINH1 BIN1 POM121 DHPS LY6E XAB2 RANGAP1 HMGA1 HMGXB3 ENC1 GMDS BRD3OS NET1 ITGB5	NO
AMIT_EGF_RESPONSE_480_MCF10A	0.659639	0.937066	0.0517405	0.294354	0.861818	31	PLEK2 GPR153 PMAIP1 ODC1 APIP TIMM10 EGLN1 SRRD	NO
AMIT_EGF_RESPONSE_60_HELA	0.565672	0.887325	0.0584693	0.306574	0.937036	38	FOXC1 PLSCR1 KLF10 PMAIP1 ZFP36L1 SLC2A3 UGCG SLC20A1 TNFAIP2 KLF6 FOSL2	NO
AMIT_EGF_RESPONSE_60_MCF10A	0.748494	0.97368	0.0459538	0.271876	0.8103	33	DLC1 PLK2 DAPP1 JUNB PTGS2 GLIPR1 IER3 TNFAIP3 SLC35D2 INHBA GADD45A PDLIM5	NO
AMIT_SERUM_RESPONSE_120_MCF10A	0.457265	0.829062	0.0664364	0.304995	1.00388	53	KLF10 CXCL10 GADD45B IFIT5 DAPP1 SETD3 PLAUR ETS2 JUNB KLF5 KLF4 CD55 EDN1 PLAGL2 CDKN1C KRT10 SPHK1 TRIM21 MCL1 STX12 GADD45A PDLIM5 IRS2 ISOC1 GCNT1	NO
AMIT_SERUM_RESPONSE_240_MCF10A	0.930408	1	0.0361492	0.219628	0.66767	37	TLR2 TNFRSF21 CDH1 PRKAG2 GLIPR1 CLTB CDKN1C ADRB2 PKP2 PDLIM5 BLZF1 TGFA ABLIM3 GABPB1 HERPUD1	NO
AMIT_SERUM_RESPONSE_40_MCF10A	0.337984	0.742951	0.08654	0.393679	1.10021	25	ADM ATF3 NAMPT FPR1 RGS2 GLUL GM2A DUSP1 FOS ZFP36 KLF6 MCL1	NO
AMIT_SERUM_RESPONSE_480_MCF10A	0.889231	1	0.0390355	0.241655	0.693716	28	S100P APIP MRGBP KRT10 TIMM23 PTX3 COPS8	NO
AMIT_SERUM_RESPONSE_60_MCF10A	0.269452	0.673839	0.095288	0.351297	1.14178	50	GAS1 MAFB PLK2 PMAIP1 TCEAL1 PNRC1 ETS2 FRMD4B PTGS2 ITSN1 TNFAIP3 RCAN1 MAP3K8 CYBRD1 INHBA PDLIM5 IRS2	NO
AMUNDSON_RESPONSE_TO_ARSENITE	0.000389662	0.0128145	0.498493	0.41907	1.63909	193	PFDN5 NEAT1 CLEC2B RAD51AP1 DLC1 RPL27 ATF3 HSPE1 LEPR ATP6V1G1 DDIT3 SIAH2 LYZ UBE2B FOXO3 MT1E DNAJB4 BCL3 LAMTOR3 ME1 DNAJA1 ZNF254 SLC22A1 EIF4EBP1 LYN BCAS2 TANK ANLN DNTTIP2 CDC42EP3 CEBPB TIMM17A CPEB4 ZNF85 TAP1 BCAT1 ETS2 JUNB UBXN8 RIT1 GRN PTPRB MT1X TSC22D3 ITGAX ZNF184 CCPG1 CLK1 ZFAND5 ATP6V1C1 IGF2R PLIN2 TPP1 ATP6V0E1 DAZAP2 UBE2H E2F6 EIF2S2 BCL2L2 NFE2L2 CEBPG HSPA1L EXT1 SCRN3 …	NO
ANASTASSIOU_MULTICANCER_INVASIVENESS_SIGNATURE	0.0948795	0.402129	0.176694	0.461795	1.34283	30	TNFAIP6 COL10A1 SPOCK1 NUAK1 VCAN TMEM158 RAB31	NO
ANDERSEN_CHOLANGIOCARCINOMA_CLASS1	0.415385	0.79783	0.0751182	0.365264	1.04856	28	SLC4A3 SLC5A9 TNFRSF12A SPP1 LPGAT1 VEPH1 FGFR2 CSPP1 MLH3 GMNN ABHD3	NO
ANDERSEN_CHOLANGIOCARCINOMA_CLASS2	0.0484361	0.300958	0.321776	-0.312346	-1.287	93	CDC20 SAPCD2 CLIC3 CDCP1 LAMB3 UBE2C MYEOV CEP55 CCNB2 CDCA3 TJP3 ELL3 BUB1 BIK MYO1A TFCP2L1 COL6A3 BHLHE41 HSPA1B NRP2 FAM83D ST6GALNAC1 VILL KIF11 GPR35 GPA33	NO
ANDERSEN_LIVER_CANCER_KRT19_DN	0.444122	0.819889	0.0687943	0.315931	1.0199	48	PEMT HSD3B7 PTMS SIAH2 ABCC6 CEBPB TFR2 ITIH1 PRDX6 SELENBP1 SLC41A2 TMEM140 PDE2A PGRMC1	NO
ANDERSEN_LIVER_CANCER_KRT19_UP	0.00080773	0.0225329	0.477271	0.641339	1.87773	31	RPS3A RPS17 RPL9 RPS25 RPL35A RPIA RPS18 DYNLT1 CBX3 CSTB RPL27A RPS12 CALM2 CCT2 NCF2 ARHGAP18 RPS14 NOP58 RPL13A CHKB	NO
APPEL_IMATINIB_RESPONSE	0.00185684	0.0404901	0.45506	0.632809	1.8166	28	MSR1 PLSCR1 LILRB3 C5AR1 ASAH1 GM2A GBA CD68 GNS CTSL CTSB CTSH CD163 CD300A PLD1 LAMP2 CTSZ HEXB	NO
APPIERTO_RESPONSE_TO_FENRETINIDE_DN	0.40325	0.787672	0.0745501	0.330901	1.04294	44	FCGR1A IFITM2 ARMC9 UGGT2 NDUFA2 ATP5PO UBALD2 UQCR10 CCNDBP1 MBOAT7 PTMA C1orf198 PGK1 FLI1 PSAT1 ATP5MF IFITM3 ISCU PPP1CC LDHA ATP5F1B MDH1 TMSB4X SET IARS2 FMNL1 RSU1 MTX2 CYB5B EPC1	NO
APPIERTO_RESPONSE_TO_FENRETINIDE_UP	0.730233	0.966555	0.0484088	0.289312	0.820932	27	SRR SDC4 TFRC STXBP3 ITGAX HSPA8 NID1 PRKACB RRP12 KIF21A AKAP9 CCNJL CYB5R1	NO
APRELIKOVA_BRCA1_TARGETS	0.0835821	0.37738	0.188204	0.446505	1.36473	38	NEFL PEG3 ANXA3 ANXA5 DNAJA1 NUMB QKI TUBA1A RIT1 PSMC2 ACTA2 HSP90AA1 LXN DDX3X CA2 KRT8 TPM1 ATP6AP1	NO
ASGHARZADEH_NEUROBLASTOMA_POOR_SURVIVAL_DN	0.0231013	0.209132	0.352488	-0.471569	-1.53457	29	GPR85 HRK NTRK1 SCN3A APBA2 CHD3 SDK1 GNAI1	NO
ASTIER_INTEGRIN_SIGNALING	0.995665	1	0.0307037	0.170622	0.538397	43	ITGAE LIMK2 COPS5 ZYX TOR1A FOS GAA ACSL3	NO
ASTON_MAJOR_DEPRESSIVE_DISORDER_DN	0.809896	0.995905	0.0356176	0.226526	0.831749	117	SPOCK1 EVI2A LPAR1 LILRA4 ST18 CADM4 SEMA3C P2RX7 SCARB2 PMP22 BCAT1 VAMP3 SNRPE FRMD4B LITAF CRYBG3 RNF19B NAPA RBM8A PTP4A2 PLAGL2 KIF1B AMD1 CDKN1C SLC31A2 PDE6B	NO
ASTON_MAJOR_DEPRESSIVE_DISORDER_UP	0.713873	0.959258	0.0797706	-0.24249	-0.84737	36	GSTM1 BCL11A JUN CEP250 PPFIA4 GSTM3 CALD1 TNFRSF25 SAMD4A TSC1 XYLT1	NO
AUNG_GASTRIC_CANCER	0.92522	1	0.0349401	0.218596	0.679378	41	OLFM4 TPT1 ZWILCH HORMAD1 ETS2	NO
AZARE_NEOPLASTIC_TRANSFORMATION_BY_STAT3_UP	0.00562255	0.0866409	0.407018	0.452474	1.61795	91	S100A8 MAP1B NEAT1 NEFL SPOCK1 S100A9 GNG11 CFH PLK2 IGF2 SRGN IFITM1 TWF1 G0S2 KCNMA1 PALLD IFI16 PID1 IL13RA1 RAB6A CYP51A1 PTGS2 RAB5A RPS4Y1	NO
AZARE_STAT3_TARGETS	0.395731	0.78244	0.0810802	0.403961	1.04877	18	S100A9 TWF1 CDK17 MCL1 CHP1 DDX3X	NO
BACOLOD_RESISTANCE_TO_ALKYLATING_AGENTS_DN	0.537572	0.870441	0.0593488	0.303939	0.959077	43	PEG3 VCAN SMPDL3A MEGF9 LIG4 MAP2K6 TLN2 PDCD6 UBE2J1 CXCR4 ZC3HAV1 PTTG1IP TCEA1 CCNG1 SETDB1 SRSF1	NO
BACOLOD_RESISTANCE_TO_ALKYLATING_AGENTS_UP	0.54485	0.875474	0.0653834	0.366289	0.939978	17	SEMA3A MYOF ACKR1 LMO2 HSPA6 MT1X	NO
BAELDE_DIABETIC_NEPHROPATHY_DN	0.00442882	0.0734204	0.407018	0.341336	1.40426	364	NEBL FOXC1 SPOCK1 LPL BCAM GAS1 ISG15 AIF1 PLSCR1 IFIT1 PSMA3 ADM MXRA7 ANXA1 VCAN PSMA6 YBX3 UBE2L6 FAT1 KCND3 SEMA3C NMI PTGDS NAMPT CASP1 F2R IFITM1 PSMA2 RNF11 PLS3 NBN TMEM123 G0S2 STAT1 PSMB9 SRGAP2 PALLD TAX1BP1 C1R DNAJA1 BIRC2 SUB1 GYG1 GLUL BST2 CYP1B1 CR1 PCMT1 CDC42EP3 PRDX6 SDC4 MTHFD2 AXL MORC3 TAP1 B4GAT1 SLC2A3 OPTN DUSP1 TGFBR3 LITAF CYP51A1 RGS10 ST3GAL6 PRKCI GALC CD55 ODC1 THS…	NO
BAELDE_DIABETIC_NEPHROPATHY_UP	0.283262	0.687958	0.0919686	0.340877	1.13106	58	HBB C4A PLPP3 CRHBP AKR1C3 AQP1 LYZ GAS2L1 GAS6 PTPRM STARD8 CTSH FTL PTPRB IMPA2 PDE2A TEK	NO
BAE_BRCA1_TARGETS_DN	0.401813	0.787672	0.0758887	0.367519	1.06408	29	TNFAIP6 STIL BAG1 HIPK3 SEMA3B PKN2 TNFAIP3 MYB	NO
BAE_BRCA1_TARGETS_UP	0.000218165	0.00802251	0.518848	0.560923	1.90942	63	IGFBP3 GNG10 NDUFA4 SAT1 LGALS3 ANXA1 MARCKS MGST1 IDI1 KYNU LSM1 EPAS1 HINT1 DRAP1 TAX1BP1 PMP22 MTMR11 CTSL COX7C CNBP GAA IFRD1 ALOX5 GTF2A2 SORL1 GMFB MSMO1 CAMLG STRN3 LAMP2 BTG1	NO
BAKER_HEMATOPOIESIS_STAT3_TARGETS	0.0782828	0.370572	0.257206	-0.515562	-1.4288	15	BIRC5 CDC25A CCND1 CCNA2 NSG1	NO
BAKKER_FOXO3_TARGETS_DN	0.966921	1	0.0256927	0.192453	0.721465	135	SLPI NRP1 GLRX5 CHN1 CCDC65 TCEAL9 TACSTD2 RASSF6 PFKFB3 DAPP1 FBXO2 POLB TPGS1 TLR1 P2RX1 FBXO45 NUDT16 PTPRE TIMM10 SLC20A1 CHST15 GFER LRRC42 CFD YIPF6 TSHZ2 RCOR1 STRN3 COPS8 THUMPD1 STRAP DCP2 N4BP2L2 PSMA1 PRKAG1 ZNF292 NDUFB10 POP5	NO
BAKKER_FOXO3_TARGETS_UP	0.10275	0.419965	0.165657	0.400126	1.30394	51	P2RY14 CTSE ARG1 ASAH1 RGS2 ZUP1 NQO2 CPEB4 TMX1 CSF2RB CCPG1 SIRPA TCP11L2 KLF6 BTG1 DSTN GUCD1 ATP7A SLC12A6 XPO7 AMPD2 CPT1A SESN1 PINK1	NO
BALDWIN_PRKCI_TARGETS_UP	0.554559	0.880719	0.059476	0.314945	0.932838	32	AQP9 ATP6V1G1 IFITM1 MEF2A TSPAN6	NO
BANDRES_RESPONSE_TO_CARMUSTIN_MGMT_24HR_DN	0.245478	0.649192	0.141225	-0.397942	-1.16043	19	MDK SPEG RAD51	NO
BANDRES_RESPONSE_TO_CARMUSTIN_MGMT_48HR_DN	0.063087	0.337072	0.287805	-0.31045	-1.27538	92	MDK MGAT3 LAMB3 GAMT SPEG BLK FOXJ1 CD79A IRS1 ALOX15B BRF1 FBN1 CD151 ATXN2L MAD1L1 BAIAP2 HCFC1 AKT2 ITGA3 MYBPH RAD9A BICD1 KIF5A PPM1G TRAF1 ADAMTS4 TUBG1 PTPN3 SHMT2 MAP4K2 DVL1	NO
BANDRES_RESPONSE_TO_CARMUSTIN_WITHOUT_MGMT_48HR_DN	0.0577048	0.324414	0.321776	-0.486625	-1.47039	21	MDK IRS1 FBN1 ITGA3 PPM1G TUBG1 MAP4K2 EPHX1	NO
BARIS_THYROID_CANCER_DN	0.942113	1	0.0334562	0.205725	0.67042	51	DUSP6 OSBPL1A IL13RA1 TNFSF13 KLF5 TNFSF10 SP110 HDGF CALM2 USP1 SNRPF SMARCA5 CTNNA1 RPL13A RAB8A KLHL9 NEDD8 IGF1R TIMP1 TJP2 ABCC3 IRF1 ERBB2 RECQL FNTA	NO
BARIS_THYROID_CANCER_UP	0.317308	0.723512	0.0919686	0.419594	1.13139	22	COX7A2 COX7B GLUL COX6A1 LPGAT1 CD46 EIF2S2 ATP6V1D	NO
BARRIER_CANCER_RELAPSE_NORMAL_SAMPLE_DN	0.0970588	0.406687	0.248911	-0.40696	-1.32432	29	GNB1L INTS1 JUN CPSF1 SPTAN1 SUPT5H NPIPB3 BCR NSMF STK25 FAAP100	NO
BARRIER_CANCER_RELAPSE_NORMAL_SAMPLE_UP	0.193798	0.573456	0.120985	0.442444	1.2365	25	CLIC2 FAS IL1R2 ATP5F1C CEP70 GALNT4 AMD1 RAB27A SNX4 PRKAG1 ALDH3A2	NO
BARRIER_COLON_CANCER_RECURRENCE_DN	0.2575	0.661022	0.135002	-0.403686	-1.15089	17	SPPL2B EPPK1 BTBD2 PFKL	NO
BARRIER_COLON_CANCER_RECURRENCE_UP	0.0910448	0.3943	0.179782	0.440521	1.34644	38	SLC18A1 CFH HGD ERGIC2 TIMM17A METTL9 PSMC2 SEC62 GPR171 YIPF6 YIPF1 COPS8	NO
BASAKI_YBX1_TARGETS_DN	0.000253713	0.00912239	0.498493	0.371521	1.51492	333	NEBL SLPI SLC25A27 CAMK2N1 NEAT1 RAP1GAP PRUNE2 CRYZL2P SAT1 RPL31 ADM DYNC2LI1 ISG20 LCN2 KRCC1 MBOAT2 GLRX MXI1 SERPINB1 CNTNAP3 IER5L HGD IFITM1 C14orf28 DHRS13 NBN PFKFB3 SERPINA1 PTP4A1 VMP1 TSPAN6 TRPC6 PROS1 BST2 TFPI GALNT3 DUSP6 CDH1 RBM47 IFI16 SBF2 WSB1 THBD YPEL5 ZNF350 ASPH H19 XRN1 DNAJC3 SLC6A12 CD302 SGK3 HINT3 SMCHD1 ZNF468 JUNB NFKBIZ ST3GAL6 FAM228B SMPDL3A CD55 TNFSF10 TMC5 RE…	YES
BASAKI_YBX1_TARGETS_UP	6.01283e-05	0.00293035	0.557332	-0.340393	-1.59045	239	AFAP1L1 SPC24 CDC20 KIF2C WNT10A BIRC5 FGF2 NEK2 CCN2 UBE2C DEPDC1B PLK1 ZWINT CEP55 CCNB2 ORC6 CDCA3 GINS1 TRIP13 BUB1 RAD51 WDR4 AJUBA GTSE1 PMEPA1 SNRPA1 CDC6 MTCL1 PTTG1 CAD CDKN3 FBN1 MCM2 UHRF1 RBM19 FRMD6 KIF20A DDX11 PGAM5 FAM83D MKI67 CCNA2 MCM10 FLNB GINS2 DNAJC9 CHEK1 RNF26 KIF4A MCM4 CTH MTHFD1 MCM7 CDCA8 SIVA1 KIF22 SMC2 COX20 SMAD7 MDC1 CENPU RANGAP1	NO
BASSO_B_LYMPHOCYTE_NETWORK	0.123426	0.461207	0.138805	0.323497	1.21396	138	MAP1B SLC4A3 LSM3 SAT1 PSMA3 HSPE1 HPRT1 SRGN RFC4 IFITM1 LGALS9 TIMM17A MRPL3 CASP4 LITAF CTSH NDUFAB1 ZYX ELOC GABARAP BUD31 HDDC2 TPP1 MYL12A TNFRSF1B SNRPF LGALS1 QPCT SP100 MVP ORC5 GSAP PRDX3 S100A4 EMG1 N4BP2L2 EEF1E1 SLC7A5 CTNNA1 POLR2H PSMB7 SPG11 RCC1 HHEX N4BP2L1	NO
BASSO_CD40_SIGNALING_DN	0.00678561	0.0982281	0.407018	-0.433901	-1.6748	60	USP6 KCNN3 JCHAIN POU2AF1 BLNK SLC2A5 ID3 RAPGEF5 BIK IRS1 CD38 CD27 ARHGEF18 AQP3 SH2B2 TTC9 ST6GAL1 RASGRP2 PNOC TCF3	NO
BASSO_CD40_SIGNALING_UP	0.1875	0.567693	0.112843	0.327828	1.17755	94	BCL2A1 IL1B GADD45B IFI30 SRGN STAT1 LHFPL2 PLEK TRIP10 LYN BATF ICAM1 IRF5 ZFP36L1 TAP1 PLXNC1 JUNB LITAF TNF IER3 PTPRE CFLAR CD58 TNFAIP3 MYB CCL4 NFKBIA TNFAIP2 LGALS1 RAB27A NCF2 IRF9 HLA-F CHD1 MAP3K8	YES
BASSO_HAIRY_CELL_LEUKEMIA_UP	0.0107891	0.13265	0.38073	0.466759	1.5988	66	HBB IGFBP3 HBA1 AIF1 MYOF TCF7L2 B2M DLC1 RIN2 ANXA1 PRSS23 RNF11 WWTR1 IL1R1 IL1R2 GABARAPL2 RTN2 TBKBP1 PTPRM BMERB1 VAMP3 PLXNC1 SMPDL3A IL18 KCTD12 PLOD2 RCBTB2 CD63 LILRB2 TNFRSF1A DPYD TMEM59 CTBP2 ARAP2 ME3	NO
BAUS_TFF2_TARGETS_UP	0.0791599	0.371883	0.202072	0.526625	1.40576	21	CCL8 ITLN1 IFIT1B PSMB9 TAP1	NO
BECKER_TAMOXIFEN_RESISTANCE_DN	0.372163	0.766877	0.0799859	0.351862	1.06966	37	COX7A2 SEMA3C IL1R1 TSPAN6 ME1 BCAS2 DUSP6 QKI OSBPL1A ACAA2 SPTSSA	NO
BECKER_TAMOXIFEN_RESISTANCE_UP	0.134328	0.479575	0.145516	0.419201	1.28128	38	ISG15 B2M IFIT1 ARL4A LGALS3BP NMI BCAS1 IFITM1 BST2 GTF2E2 PTK6 RNASE4	NO
BEGUM_TARGETS_OF_PAX3_FOXO1_FUSION_DN	0.213018	0.603117	0.164406	-0.354963	-1.17658	30	WNT11 SERPINE1 KCNG1 FLNB MYC DGKD BIN1 LBH ITGA3 BMP1 F2RL1	NO
BEGUM_TARGETS_OF_PAX3_FOXO1_FUSION_UP	0.192024	0.572868	0.118288	0.383256	1.20796	44	PLSCR4 GNG11 STX11 TMEFF1 SEMA3C CDYL PTPRG CALCRL PLXNC1 SH3GLB1 TWSG1 ADAMTS5 DPYD	NO
BEIER_GLIOMA_STEM_CELL_DN	0.58156	0.897524	0.054794	0.280032	0.935531	59	IGFBP3 HNMT FBXO6 IFIT5 BASP1 DUSP3 EIF4E3 SNX21 NFKBIZ FTH1 SOS2 KIAA0930 TIMP2	YES
BEIER_GLIOMA_STEM_CELL_UP	0.171607	0.544141	0.130106	0.448688	1.26022	26	NT5C3A LAMP5 AKAP7 ABCA1 PPP1R17 SOCS6 H19 C18orf54	NO
BENNETT_SYSTEMIC_LUPUS_ERYTHEMATOSUS	0.00979121	0.125207	0.38073	0.58589	1.6819	28	S100A8 ISG15 PLSCR1 LGALS3BP FPR2 APOBEC3B IFI44L RNASE2 STAT1 DEFA1 CAMP TAP1 TNFSF10 CKAP4 DEFA3	NO
BENPORATH_EED_TARGETS	0.139335	0.489247	0.118288	0.276436	1.14644	439	RPS6KA6 INHBB PGM5 CNRIP1 FOXC1 CACNA1E NRG1 CAMK2N1 NEFL IGFBP3 LPL KL FRMD3 COLEC12 HBA2 NTNG2 HBA1 ADRA2A SV2B MAFB NRN1 RIMBP3C NTN4 SORCS3 STK32B LAMP5 LGALS3 ADM ATF3 ZNF365 CNNM1 ISL2 HOPX FZD1 KCNJ2 CRHBP KCND3 AFF2 SHISA2 IRAK3 IGF2 CA3 ADGRG6 F2R PDGFRA ZCCHC2 CBR3 IER5L OTX1 PROK2 PODN DHRS13 FBXO39 KCNMA1 ZNF503 CMTM2 LONRF3 RAB24 FBN2 EPAS1 EPHB1 ASAH1 TSPAN6 SLIT1 PMP22 BATF3 CYP1B1…	NO
BENPORATH_ES_1	0.236842	0.637834	0.276501	-0.220842	-1.05933	303	TUBB2B GLDC DSG2 CDC20 KIF2C BIRC5 FGF2 RRM2 LSR GPRC5B ORC1 CACHD1 CDC25A SALL2 BUB1 LARGE2 PFAS MFGE8 TTLL12 CDC6 PTTG1 PASK ITPR3 MCM2 GINS4 LEFTY1 CCNA2 MCM10 DNMT3A GINS2 ADD2 ERCC6L CHEK1 KIFC2 CDCA5 KIF4A PCDH1 PARP1 MCM4 MTHFD1 MCM7 POLR3G PODXL EXOSC5 AUTS2 ST6GAL1 RCC2 MAP7 RCC1L HMGA1 MDN1 CNTNAP2 CYP2S1 CBX5 TMEM177 BOP1 AASS LGR4 SLC29A1 RUVBL1 GPR19 MTA3 CDT1 PYCR2 ILF3 MYO19 LRIG1 …	NO
BENPORATH_ES_2	0.0465116	0.29605	0.261664	0.527217	1.47341	25	HESX1 L1TD1 DSCC1	NO
BENPORATH_ES_CORE_NINE_CORRELATED	0.349528	0.75297	0.0772747	0.304486	1.07716	83	FOXC1 HMGB2 NFIL3 NMI YBX1 STAT1 SAP30 WWTR1 DEK MYBL1 CEBPB PNRC1 ETV6 KLF5 ELF4 TBX19 NFE2L3 TFDP1 MSL3 PLAGL2 E2F8 HIF1A EZH2 HTATIP2 CEBPG NFKBIE	YES
BENPORATH_ES_WITH_H3K27ME3	0.0277481	0.232722	0.282013	0.305691	1.26702	427	SATB2 ANKRD35 RPS6KA6 PGM5 CNRIP1 FOXC1 CACNA1E NRG1 SLC25A27 CAMK2N1 NEFL IGFBP3 PARD3B LPL KL RTL5 FRMD3 COLEC12 HBA2 PRUNE2 NTNG2 HBA1 ADRA2A SV2B MAFB NRN1 CCDC96 PDE8B RIMBP3C SORCS3 STK32B LAMP5 LGALS3 NRXN1 ATF3 MXRA7 SECTM1 CNNM1 ISL2 FZD1 RAB9B GNAO1 CADM4 TACSTD2 KCND3 RBP7 CCNA1 MFSD4A F2R PDGFRA CBR3 HPSE CLEC4G SPTB OTX1 PROK2 PODN KCNMA1 ZNF503 CMTM2 LONRF3 FBN2 EPAS1 LEKR1 EPHB1 TC…	NO
BENPORATH_MYC_TARGETS_WITH_EBOX	0.393579	0.780788	0.0649408	0.265247	1.03974	195	HBB RPL36A RIDA DBI HBA2 PSMA3 ISG20 MGST1 MELTF PLA2G4A NBN BRCA2 TXN BCL3 RGS2 RPS6 POLB GAS8 ICAM1 ASCL2 RBM3 ETS2 JUNB CSTB TFRC PTEN RPL27A CHRNB1 CD63 PSMB1 RHOG IMPA2 CLNS1A AMD1 CASP8 ACADM RPL22 IRF2 EBP BSG NIT1 HIF1A TCIRG1 KLF1 APC MYCL CDK4 HSP90AA1 TOP1 ALDH2 RPL13A ARF4 LBR HMGN2 RCC1 TIMM17B PTMA AMPD2 ITGB1 MDM2 HDAC3 PPID SRD5A1 TOMM20 DKK3 DCK ACOX1 HSPA8 ATF7 ARSB UBA52 GLA BA…	NO
BENPORATH_NOS_TARGETS	0.0505051	0.305139	0.224966	0.348912	1.31007	140	HESX1 NEBL RPS3A GNG10 DTNA CAPZA2 ATP6V1G1 IER5L CDYL RPS18 CA4 DUSP6 IFI16 RNF24 ZFP36L1 KATNBL1 KLF5 LRRN1 DUSP12 PRR11 UBE2D3 UFM1 ZEB2 NFE2L3 RAB5A RESF1	NO
BENPORATH_OCT4_TARGETS	0.0984936	0.408396	0.15017	0.305508	1.21541	232	HESX1 NEBL RPS3A NEFL GNG10 GAS1 HMGB2 PSMA3 DTNA CAPZA2 WDFY3 CNTNAP3 ATP6V1G1 IER5L MKRN1 CDYL MRPL13 RPS18 CA4 DUSP6 CDH1 IFI16 SLIRP RNF24 ZFP36L1 ARPC5 KATNBL1 KLF5 LRRN1 DUSP12 PRR11 UBE2D3 SORBS1 UFM1 ZEB2 NFE2L3 RAB5A ABTB2 RESF1 TXN2 ENTPD1	NO
BENPORATH_PRC2_TARGETS	0.0325691	0.255314	0.321776	0.342113	1.35224	219	RPS6KA6 PGM5 CNRIP1 CACNA1E NRG1 CAMK2N1 NEFL LPL KL FRMD3 COLEC12 HBA2 NTNG2 HBA1 ADRA2A SV2B MAFB RIMBP3C SORCS3 STK32B LAMP5 LGALS3 ATF3 CNNM1 ISL2 KCND3 F2R PDGFRA CBR3 OTX1 PROK2 PODN KCNMA1 ZNF503 CMTM2 LONRF3 FBN2 EPAS1 EPHB1 SLIT1 PMP22 BATF3 LYSMD2 CYP26B1 EPB41L4A TET2 NAGS ADAP2 CXCL16 THBD	NO
BENPORATH_PROLIFERATION	0.594629	0.905089	0.0489954	0.252854	0.945527	132	RAD51AP1 S100A9 PSMA3 SNRPG PDCD10 APOBEC3B NMI RFC4 SNRPD1 CKS2 CENPN DEK GNB4 ANLN SRPK1 GGCT HSPA14 DCUN1D5 S100A11 NFE2L3 RIT1 WDR26 CSTB TFRC FANCA AURKA RBM8A KNSTRN	NO
BENPORATH_SUZ12_TARGETS	0.00887102	0.118622	0.38073	0.328019	1.35691	416	FGF13 RPS6KA6 TMEM255A PGM5 RORB CNRIP1 CACNA1E NRG1 CAMK2N1 NEFL LPL KL FRMD3 COLEC12 HBA2 NTNG2 HBA1 NRP1 ADRA2A SV2B ERG MAFB PDE8B RIMBP3C SORCS3 DLC1 STK32B LAMP5 LGALS3 ADM ATF3 ZNF365 SECTM1 CNNM1 ISL2 HOPX TENT5C RAB9B KCNJ2 CRHBP TACSTD2 KCND3 RBP7 AFF2 SHISA2 CCNA1 IGF2 CA3 MFSD4A F2R PDGFRA CBR3 IER5L CLEC4G SPTB OTX1 PROK2 PODN PLS3 FBXO39 KCNMA1 ZNF503 CMTM2 RAB31 LONRF3 FBN2 ABCC6 E…	NO
BERENJENO_ROCK_SIGNALING_NOT_VIA_RHOA_DN	0.121701	0.456714	0.152145	0.415098	1.29009	41	NRP1 PRSS23 ABRACL PPP1CB KAT2B WSB1 QKI DOCK5 WWC2 WSB2 KLF5 UGCG SH3GLB1 SSB MYL12A KLF6 SC5D ACTA2	NO
BERENJENO_TRANSFORMED_BY_RHOA_DN	0.307263	0.714297	0.0741759	0.261763	1.06556	319	MMP14 IGSF10 MYO10 FKBP7 IFT81 LPAR1 GAS1 PDK4 MAOA RIN2 FZD1 MARCKS ZNF32 CNN3 NDUFA6 F2R PDGFRA DDIT3 MKRN1 WASHC3 MYL12B RAB24 SLC1A5 C1R FAM8A1 PMP22 CYP1B1 TRAFD1 GBA RBMS2 GAS6 TLR6 NPC2 GNS RTRAF PTPRM GLMP IFI27L2 OSBPL1A FKBP9 HEBP1 PLA2G7 MGST3 LAPTM4A HSD17B11 RAB9A RNASE4 CYP51A1 AP3S1 GRINA GRN TXNIP PTEN PSAP EID1 NAGA CLK1 MPC2 GAA MAP1LC3B TXNDC16 GABARAP RRAGC ZSCAN21 MTSS2 IL17R…	NO
BERENJENO_TRANSFORMED_BY_RHOA_FOREVER_DN	0.104235	0.423692	0.175204	0.511059	1.35115	20	ANXA3 PHLDA1 F2R PLAUR CAVIN2 PTGS2 IER3 CHD1 NOP58	NO
BERENJENO_TRANSFORMED_BY_RHOA_REVERSIBLY_DN	0.722481	0.962979	0.0488971	0.294109	0.821947	25	ADM ERRFI1 IGF2 DUSP6 LATS2 SORBS1 FEZ2 AK4 INHBA ALCAM	NO
BERENJENO_TRANSFORMED_BY_RHOA_UP	0.959746	1	0.0147735	0.19222	0.801682	479	HMGN5 RAD51AP1 LSM3 HMGB2 HAT1 ANXA3 POLE2 PLSCR1 BPGM ADM NUSAP1 PNPT1 VRK1 ERRFI1 YBX3 C9orf40 PHLDA1 PLK2 AQP1 PLA2G4A IGF2 HPRT1 PHF5A RBM38 RFC4 C4orf3 TXN SAP30 SNRPD1 GK CKS2 SPECC1 DEK SLC35E4 DUSP6 ATP1B3 ANLN GGCT TMEM176A HIGD1A PRDX6 THBD MTHFD2 ADAM12 HSPA14 BCAT1 PLAUR HPF1 MRPS22 DUSP1 PHC2 TDP2 KLF4 CDC34 LATS2 NFKBIZ SORBS1 GSDME CAVIN2 PTGS2 ODC1 IER3 TFRC PSMC2 SNRPD3 CHRNB1 PT…	YES
BERNARD_PPAPDC1B_TARGETS_DN	0.669086	0.940869	0.049391	0.271043	0.874996	48	RAP1GAP MXI1 PRLR SERPINA1 GPR153 PTPRG FAR2 PROSER2 MT1X SPRED2	NO
BERNARD_PPAPDC1B_TARGETS_UP	0.0163352	0.173129	0.352488	0.538408	1.60467	33	RSL24D1 FRMD4A ARPC3 KYNU COX7B COX7C KLHL2 WBP4 BLOC1S6	NO
BERTUCCI_INVASIVE_CARCINOMA_DUCTAL_VS_LOBULAR_DN	0.0231364	0.209132	0.352488	0.587091	1.58303	22	RPL34 ERG PDK4 RPL31 F2R CCDC82 TXNIP TEK TNFRSF1B	NO
BERTUCCI_INVASIVE_CARCINOMA_DUCTAL_VS_LOBULAR_UP	0.635772	0.924989	0.057006	0.334104	0.879373	19	RPIA JAK2 CDH1 SLF1 HSPA8 ERBB2 FAAP20 UBE2L3 YWHAB	NO
BERTUCCI_MEDULLARY_VS_DUCTAL_BREAST_CANCER_DN	0.645161	0.92927	0.045679	0.247301	0.920394	127	SLC4A3 SPOCK1 ZNF727 DLC1 MXRA7 ZNF385D SORT1 FAM210B MBOAT2 LSP1P4 AQP1 EMC3 STARD13 LGALSL CX3CR1 ADAM12 H19 SNX21 RGS5 FKBP9 PICALM PDGFD CNIH3 RIT1 SPRED2 SEMA5A RTN4 KANK2 MYL9 TMEM192 ACSL3 DDR2 RCAN1 KCNMB1 ACTA2 ZNF20 TLN2 COPS8 MMGT1 DAAM1	NO
BERTUCCI_MEDULLARY_VS_DUCTAL_BREAST_CANCER_UP	0.217443	0.60827	0.0968878	0.287461	1.12433	193	STYK1 GZMA MIR155HG ANKRD22 CALHM6 LAG3 IL15 YBX3 GLRX TREX1 SOCS3 IFI30 PRR13 SRGN SIAH2 NBN STAT1 C9orf72 PSMB9 CLEC7A TLR2 GYG1 TRAFD1 DDX50 ICAM1 RNF207 TAP1 CTSS ETV6 PLGRKT NFE2L3 IQCG PPIF PSAP CHCHD1 MCMBP EPB41 RILPL2 PPA1 CEBPD IL15RA TNFRSF1B CYBA TNFAIP2 PSMB8 PARP8 ZCCHC9 RASGEF1A SPATA5L1 CGAS ABCC4 NFKBIE TNFRSF14 MICB EMG1 NCF1 SELENOH HSH2D DRAM1 ASPHD2 AIM2 MAGOHB KBTBD8 C1S C1R…	YES
BHATI_G2M_ARREST_BY_2METHOXYESTRADIOL_DN	0.0455154	0.292612	0.245042	0.389879	1.39546	92	RPL34 RPL26 RPL36A RPS17 PDE8B RPL31 KRCC1 DDIT3 BAG1 ZFAND1 C5 METTL9 MTHFD2 RHAG RBM3 ZNF613 AIG1 XK IGBP1 JRKL IFRD1	NO
BHATI_G2M_ARREST_BY_2METHOXYESTRADIOL_UP	0.327979	0.732969	0.0802023	0.29954	1.07212	92	CALHM6 RABGEF1 PSMA3 GNG11 ANXA1 PDGFC TACSTD2 KYNU CTNNAL1 PSMA2 WWTR1 TTC39A GALNT3 PCMT1 HCK CBX3 IER3 TFRC NDUFAB1 EBLN2 AURKA FOS	NO
BHATTACHARYA_EMBRYONIC_STEM_CELL	0.034029	0.260823	0.321776	0.428572	1.46237	65	RPS24 RPL7 RSL24D1 HMGB2 PSMA3 ZNF257 MGST1 TNNT1 IFITM1 IGF2BP2 PSMA2 RPL24 GNL3 MTHFD2	NO
BHAT_ESR1_TARGETS_NOT_VIA_AKT1_DN	0.851648	1	0.0357691	0.226349	0.783516	70	NRP1 PDK4 TCF7L2 KYNU S1PR3 CPEB4 DLL1 RNF144B CD55 RNF43 SASH1 TSC22D3 EFNA1 RGL1 CHST15 CYB5D2 UBE2H MAP3K5 EXT1 ATXN1 RERE SUSD6 KCTD18 ATP1B1	NO
BHAT_ESR1_TARGETS_NOT_VIA_AKT1_UP	2.53478e-05	0.00143401	0.57561	-0.39405	-1.75321	155	TUBB2B MPPED2 SLC47A1 HPDL MYEOV LONRF2 TJP3 DEPTOR SHB WFS1 CCND1 DEGS2 C16orf74 FAM102A XRCC3 CDC6 MYBBP1A KHK IGFBP4 SMOX UHRF1 NT5DC3 CXXC5 ARHGEF18 MED24 TRMT61A SEC14L2 SRM AMZ1 MCM10 FLNB PPRC1 SH2B2 GPRIN1 ACSS1 LETM1 UBIAD1 TMPRSS3 C1QTNF6 SOX8 INO80B FCMR DOK7 ACIN1 FKBP4 NEIL2 SLC29A1 NOL6 BCL11B DHRS3 SUSD3	NO
BHAT_ESR1_TARGETS_VIA_AKT1_DN	0.936709	1	0.0323604	0.201741	0.680232	62	NRP1 PDK4 PLPP3 IL1R1 S1PR3 CPEB4 DLL1 RNF144B SASH1 EFNA1 AFAP1L2 CHST15 UBE2H ST8SIA4 RAB18 LMBRD1 EPS8 ZNF277 GRHL1 ATP1B1 GPD2 YPEL2 HBP1 KIAA0513 YPEL3	NO
BHAT_ESR1_TARGETS_VIA_AKT1_UP	1.43066e-05	0.000911342	0.593325	-0.367323	-1.69684	209	TUBB2B MPPED2 STX1A RECQL4 HPDL MYEOV TPBG LONRF2 TJP3 SHB WFS1 TMEM120B LTBP3 CCND1 DEGS2 RAB11FIP3 C16orf74 FAM102A XRCC3 CDC6 MYBBP1A KHK IGFBP4 UHRF1 NT5DC3 CXXC5 ARHGEF18 MED24 TRMT61A SEC14L2 SCARB1 SRM AMZ1 ADARB1 FLNB PPRC1 GINS2 TBC1D16 SH2B2 PCYT2 JADE2 GPRIN1 PAK4 MCM7 ADCY3 LETM1 UBIAD1 PODXL C1QTNF6 INO80B QSOX2 FCMR IMP4 DOK7 ACIN1 SLC7A6 UBQLN4 FKBP4 NEIL2 SLC29A1 RUVBL1 NOL6 BCL11…	NO
BIDUS_METASTASIS_DN	0.161578	0.526571	0.119888	0.315457	1.18044	131	CNRIP1 TLR5 GMFG FRMD4A LAMP5 HP RIN2 STAB1 TBC1D8B AQP1 MS4A6A CLEC11A SLC25A37 C14orf28 NBN WASHC3 ZSCAN16 GYPC RAB4B RASSF4 KLHL2 ATP8B4 TMC5 SEMA5A CPPED1 RGL1 SLA CFLAR TNFRSF1A SIRPA NHS CTBP2 TMEM50B MVP NAGK TUT7 VWA5A	NO
BIDUS_METASTASIS_UP	0.971496	1	0.0215798	0.185078	0.726113	196	IFT81 NUSAP1 MARCKS VBP1 LMNB1 YBX1 RFC4 CDYL SNRPD1 PTP4A1 CENPN PATL1 CREB5 MXD1 AZI2 HNRNPH3 ODC1 TFRC CEP57 AGAP1 PLOD2 AURKA TFDP1 RNF138 KNSTRN PAIP1 KIF1B AMD1 PTGES3 NCAPH RMND5A RCOR1 DCTN4 STRN3 UBXN2B COPS8 EIF1 CEBPG TMEM33 HSP90AA1 SGMS2 CCDC15 WAC KCTD6 PSMD10 NFIB AZIN1 PPP2CA PRELID3B	NO
BILANGES_RAPAMYCIN_SENSITIVE_GENES	0.0459642	0.294651	0.321776	0.518201	1.5172	31	RPL34 RPL11 SAT1 RPL27 ACSL1 RPL35 SHTN1	NO
BILANGES_RAPAMYCIN_SENSITIVE_VIA_TSC1_AND_TSC2	0.380282	0.770836	0.0751182	0.31725	1.06326	60	RPL35A GYG1 RTRAF BLVRB BTF3 EIF3E IGBP1 CCT2 KDELR1 NSA2 MRPL30 PRDX3 SERPINB6 OLA1 AIMP1 PSAT1 TOMM20 RPL3 PRCP NUDT21 NAP1L1 TCP1 SLC25A5 EIF3K RPL10A CNIH1 CRYZ FXR1 NME2 RPH3AL RPL36 UQCRFS1	NO
BILANGES_SERUM_AND_RAPAMYCIN_SENSITIVE_GENES	0.000513085	0.0160222	0.477271	0.564953	1.82381	48	RPS24 RPL23 RPL36A RPS7 RPS17 RPL21 TMEM121B RPL30 RPL24 RPS6	NO
BILANGES_SERUM_RESPONSE_TRANSLATION	0.163462	0.52942	0.135741	0.473274	1.27613	22	RPS7 RPL21 TCF7L2 RPS6 EEF1A1 RPL4 NSA2 EEF1G RAVER2	NO
BILANGES_SERUM_SENSITIVE_GENES	0.845152	1	0.0385579	0.235547	0.767604	51	LPAR6 TCF7L2 AQP1 BLVRB EIF3E NCEH1 NFAM1 IGBP1 CDKN1C NSA2 RRAGD LBR RAVER2 OLA1 TOMM20 NAP1L1 TLE3	NO
BILANGES_SERUM_SENSITIVE_VIA_TSC2	0.0151166	0.163932	0.38073	-0.525728	-1.64963	25	TUBB2B CCN2 KIFC1 NUMA1 TBC1D16 EIF5B SMARCA4 SPAG5	NO
BILBAN_B_CLL_LPL_DN	0.0110781	0.13538	0.38073	0.527736	1.64016	41	HMGB2 SAT1 ANXA1 MARCKS GLRX MS4A6A MNDA FGL2 PMAIP1 RGS2 KLRK1 DUSP1 JUNB KLF4 IER3 FOS SORL1	NO
BILBAN_B_CLL_LPL_UP	0.0852459	0.381522	0.282013	-0.335861	-1.29548	57	PEG10 IRF4 HLA-DQA1 DIP2C FCER2 BACH2 DMD FLNB CEACAM1 CCR7 OAS2 ZFP64 BCL7A ST6GAL1 ARMCX2 SLC39A14 SGCE DIPK1A TRRAP SERINC5 AGPAT5 SIT1	NO
BILD_CTNNB1_ONCOGENIC_SIGNATURE	0.624829	0.919121	0.0496901	0.263971	0.907792	67	COL13A1 VCAN ARHGAP29 CBX3 QKI KATNBL1 FGD6 LATS2 TNFAIP3 SORL1 DDR2 PLAGL1 WASHC4 TOP1 TAF1D ARL5A ELF1 COL8A2 PHACTR2 NEK1 SCAF11 SRSF10 SMC3 NR3C1 LARP4B RUNX2 FBXO11 CHD9 RBM25 HIPK2 ASH1L BOD1L1 PIK3C2A NEMF TRIM14 TMCC1 FRYL FAM120A THOC2	NO
BILD_E2F3_ONCOGENIC_SIGNATURE	0.599045	0.907338	0.0454968	0.240079	0.939707	194	RPL17 INHBB CAMK2N1 NEFL SH3BGR ABCG2 IL1B POLE2 PLPP3 CCNE2 FZD1 TMEM158 SLC27A3 GAS5 AP1S2 MRAS PFKFB3 PRRG4	NO
BILD_HRAS_ONCOGENIC_SIGNATURE	0.00147009	0.0342739	0.45506	0.392247	1.521	185	MMP14 ARG2 MEG3 GAS1 DNAJC6 IL1B PI3 TCF7L2 MBOAT2 CCNA1 SERPINB1 NAMPT CASP1 HPSE PPBP G0S2 GK LHFPL2 S100A6 ABCA1 LYN CYP1B1 MYD88 DUSP6 MXD1 MTUS1 TNFRSF12A SDC4 DLL1 RAPH1 PLAUR B3GNT5 SLC2A3 CXCL1 DUSP1 JUNB KLF5 NFKBIZ PTGS2 CD55 ODC1 IER3 PLXNA2 PPIF BCL6 HMGN3 ADAMTS5 RNF152 PTPRE HK2 FBXO9 FOS CXCL5 MAP1LC3B PNPLA8 CALM2 ZFP36 SOCS1 SLC20A1 SLC16A3 SESN3 KLF6 ADRB2 PTX3 ARHGAP27 LPAR2 MC…	YES
BILD_MYC_ONCOGENIC_SIGNATURE	0.0710215	0.354754	0.287805	-0.267275	-1.20894	176	OR2A4 SLC29A2 CGN KCNQ5 SMTN METTL1 DHRS1 TTLL12 PLEKHG2 CCDC86 MYBBP1A UBE2D4 PLEC BEND3 ALS2CL BCS1L FAM86B3P SRM PLAU SPTAN1 TAF4B MYC DGKA TCOF1 CDCA8 AIMP2 UBIAD1 EXOSC5 C19orf48 IPO4 ZNF667 NUFIP1 IMP4 TGM1 UTP20 STMN3 BOP1 NOP2 DCAF4 NOL6 FARSA NEU3 AGPAT5 WDR74 TRMT1 VAMP1 MEAK7 ARNTL2	NO
BILD_SRC_ONCOGENIC_SIGNATURE	0.981187	1	0.0314929	0.185997	0.606129	51	FANCL CASP1 GAS2L1 ITPRID2 FRMD4B TNFAIP3 IL17RA SORL1 MARK3 SRC DCBLD2 SACS	NO
BIOCARTA_41BB_PATHWAY	0.493399	0.847596	0.0699459	0.384941	0.969901	15	MAPK14 IFNG NFKBIA MAP4K5 MAP3K5 CHUK TNFRSF9 MAP3K1	YES
BIOCARTA_AGR_PATHWAY	0.880452	1	0.0417397	0.260015	0.694077	21	NRG1 SP1 CDC42 GIT2 RAC1 ITGB1 PAK1 MAPK1 PAK2	NO
BIOCARTA_AKT_PATHWAY	0.166124	0.534072	0.135741	0.481525	1.27307	20	BAD FOXO3 NFKBIA HSP90AA1 CHUK FOXO4 PPP2CA FASLG PIK3CA	YES
BIOCARTA_ALK_PATHWAY	0.597756	0.906863	0.0592219	0.331555	0.902653	23	FZD1 TGFBR3 TGFBR1 APC BMPR2 NOG SMAD5 GSK3B RFC1	NO
BIOCARTA_ARAP_PATHWAY	0.9575	1	0.0579755	-0.223941	-0.638447	17	ARFGAP1 ASAP2 GPLD1 CYTH3	NO
BIOCARTA_ARENRF2_PATHWAY	0.260982	0.664527	0.13649	-0.389648	-1.13624	19	FXYD2 JUN AKR7A2 PRKCA HMOX2	NO
BIOCARTA_ARF_PATHWAY	0.944444	1	0.0590955	-0.217292	-0.602191	15	MYC ABL1 TP53 POLR1B POLR1A POLR1C E2F1 PIK3CG PIK3R1 RB1 PIK3CA CDKN2A MDM2 RAC1 POLR1D	NO
BIOCARTA_AT1R_PATHWAY	0.975923	1	0.036685	0.208167	0.571579	24	CALM2 HRAS GNAQ RAC1 MAP2K4 PAK1 MAP2K2 MAPK1 PTK2B MAP3K1	NO
BIOCARTA_ATM_PATHWAY	0.74677	0.972845	0.0716527	-0.28268	-0.824315	19	RAD51 JUN CHEK1 ABL1	NO
BIOCARTA_ATRBRCA_PATHWAY	0.793269	0.991719	0.0461379	0.279867	0.761932	23	TREX1 NBN BRCA2 FANCA	NO
BIOCARTA_BAD_PATHWAY	0.681301	0.944427	0.0537873	0.320333	0.843127	19	BAD CSF2RB PRKAR1A IGF1R MAPK1 PIK3CA BAX PRKACB RPS6KA1 PRKAR2B YWHAH	NO
BIOCARTA_BARRESTIN_SRC_PATHWAY	0.484848	0.842525	0.0937465	-0.347749	-0.963731	15	KCNA2 DNM1 KCNA3	NO
BIOCARTA_BCELLSURVIVAL_PATHWAY	0.310606	0.716511	0.122108	-0.391757	-1.08569	15	BIRC5	NO
BIOCARTA_BCR_PATHWAY	0.36036	0.760385	0.123842	-0.317199	-1.06005	32	CD79A CD79B NFATC1 PLCG1 JUN PRKCA ELK1	NO
BIOCARTA_BIOPEPTIDES_PATHWAY	0.782946	0.987994	0.0452247	0.279324	0.780627	25	STAT1 JAK2 MAPK14 CDK5 CALM2 HRAS MAP2K2 STAT3 MAPK1 PTK2B	NO
BIOCARTA_CALCINEURIN_PATHWAY	0.785714	0.989486	0.048215	0.299632	0.768922	17	MARCKS CALM2 SP1 SP3 CDKN1A PPP3CA GNAQ	NO
BIOCARTA_CARM_ER_PATHWAY	0.46438	0.831894	0.0988903	-0.317471	-0.997974	24	GRIP1 CCND1 ESR1 PELP1	NO
BIOCARTA_CASPASE_PATHWAY	0.198718	0.581937	0.121543	0.461286	1.24381	22	LMNB1 CASP1 BIRC2 GZMB CASP4 CASP6 CASP3 CASP8	NO
BIOCARTA_CCR3_PATHWAY	0.942244	1	0.0395979	0.233755	0.588972	15	PLCB1 HRAS GNAQ RHOA MAPK1	NO
BIOCARTA_CCR5_PATHWAY	0.717822	0.960817	0.052057	0.323122	0.814141	15	MAPK14 FOS CALM2 CCL4 CCR5 GNAQ CXCR4 PTK2B	NO
BIOCARTA_CD40_PATHWAY	0.938944	1	0.0397596	0.237896	0.599406	15	DUSP1 TNFAIP3 NFKBIA CHUK MAP3K1	YES
BIOCARTA_CDMAC_PATHWAY	0.939394	1	0.0406579	0.237576	0.601573	16	TNF FOS NFKBIA PLCB1 HRAS MAPK1	YES
BIOCARTA_CELLCYCLE_PATHWAY	0.529101	0.865256	0.0913924	-0.303877	-0.937979	23	CCNE1 CDC25A CCND1	NO
BIOCARTA_CERAMIDE_PATHWAY	0.483037	0.841467	0.0699459	0.369018	0.985048	21	BAD TNFRSF1A CASP8 NSMAF RIPK1 MAP2K4 MAPK1 MAP3K1 BAX	NO
BIOCARTA_CHEMICAL_PATHWAY	0.497537	0.84937	0.0692836	0.37177	0.965201	18	BAD STAT1 CASP6 CASP3 BID	NO
BIOCARTA_CREB_PATHWAY	0.767101	0.981898	0.0484088	0.293451	0.77583	20	MAPK14 PRKAR1A HRAS RAC1 MAPK1 PIK3CA RPS6KA5 PRKACB RPS6KA1 CREB1 PRKAR2B GRB2 PRKCB	NO
BIOCARTA_CSK_PATHWAY	0.396947	0.782605	0.106323	-0.358365	-1.03304	18	HLA-DRB5 ZAP70 PRKAR1B	NO
BIOCARTA_CTCF_PATHWAY	0.888889	1	0.0642141	-0.229006	-0.706872	23	CD79A CD79B MYC	NO
BIOCARTA_CTLA4_PATHWAY	0.209302	0.595797	0.154191	-0.41028	-1.19641	19	HLA-DRB5 ICOSLG ICOS CTLA4 LCK ITK CD28 HLA-DRB1	NO
BIOCARTA_CXCR4_PATHWAY	0.90404	1	0.042417	0.255056	0.645836	16	CRK HRAS GNAQ CXCR4 MAPK1 PTK2B PIK3CA	NO
BIOCARTA_DEATH_PATHWAY	0.635385	0.924989	0.0544556	0.305379	0.876646	28	BIRC2 TNFSF10 CASP6 CASP3 BID CFLAR CASP8 NFKBIA RIPK1 CHUK	YES
BIOCARTA_ECM_PATHWAY	0.482759	0.841433	0.0707899	0.37687	0.978441	18	HRAS ITGB1 GSN RHOA MAPK1 PIK3CA ARHGAP5 ROCK1 RAF1 DIAPH1 PIK3R1 TLN1 PIK3CG	NO
BIOCARTA_EDG1_PATHWAY	0.495114	0.848078	0.0691198	0.372737	0.985449	20	PDGFRA ASAH1 ITGAV PLCB1 SPHK1 RAC1 RHOA MAPK1 PIK3CA	NO
BIOCARTA_EFP_PATHWAY	0.883838	1	0.062249	-0.256592	-0.711103	15	CCNB2 ESR1	NO
BIOCARTA_EGF_PATHWAY	0.99169	1	0.0611693	-0.167743	-0.5325	26	PLCG1 JUN PRKCA ELK1 SRF SHC1 MAP2K1	NO
BIOCARTA_EICOSANOID_PATHWAY	0.887043	1	0.0426734	0.26216	0.67276	17	PLA2G4A PTGS2 ALOX5 TBXAS1 PLCB1 PTGER3	NO
BIOCARTA_EIF4_PATHWAY	0.847756	1	0.0431037	0.265267	0.722185	23	EIF4EBP1 MAPK14 PTEN MKNK1 EIF4G3 RPS6KB1 MAPK1 EIF4A2 PIK3CA	NO
BIOCARTA_EIF_PATHWAY	0.922559	1	0.041488	0.247898	0.627709	16	EIF4G3 EIF2S2 EIF1 EIF5 EIF4A2 EIF4A1 EIF1AX EIF4E EIF2S1 EIF2S3 EIF6 EIF4G2	NO
BIOCARTA_EPO_PATHWAY	0.949109	1	0.0592219	-0.22689	-0.654044	18	PLCG1 JUN ELK1	NO
BIOCARTA_ERAD_PATHWAY	0.856911	1	0.0432769	0.267093	0.702998	19	RBX1 FBXO2 SKP1 CANX MAN1A1 MAN2A2 CUL1 MAN1A2	NO
BIOCARTA_ERK_PATHWAY	0.463141	0.831127	0.0716527	0.375937	1.01367	22	PDGFRA MKNK1 DPM2 HRAS PPP2CA ITGB1 MAP2K2 STAT3 IGF1R MAPK1 RPS6KA5	NO
BIOCARTA_ETS_PATHWAY	0.96	1	0.057853	-0.218311	-0.622395	17	CSF1 JUN ETS1 HDAC5	NO
BIOCARTA_FAS_PATHWAY	0.807229	0.995901	0.0425023	0.259837	0.755565	30	LMNB1 FAS RIPK2 CASP6 CASP3 CFLAR CASP8 PTPN13 MAP2K4 PAK1 FASLG PAK2 MAP3K1	NO
BIOCARTA_FCER1_PATHWAY	0.808955	0.995901	0.0419926	0.254467	0.777771	38	PLA2G4A FCER1G LYN FOS CALM2 HRAS PPP3CA MAP2K4 FCER1A MAPK1 MS4A2 PIK3CA PAK2 MAP3K1	NO
BIOCARTA_FMLP_PATHWAY	0.177711	0.553801	0.125033	0.427119	1.25053	31	FPR1 MAPK14 CALM2 NFKBIA PLCB1 MAP2K6 NCF2 MAP2K3 HRAS NCF1 PPP3CA RAC1 PAK1 MAP2K2 MAPK1	YES
BIOCARTA_G1_PATHWAY	0.434174	0.810646	0.10673	-0.315192	-1.00729	27	CCNE1 CDC25A CCND1	NO
BIOCARTA_G2_PATHWAY	0.301587	0.708021	0.127505	-0.358949	-1.10797	23	PLK1 CDC25A WEE1 CHEK1 CDC25B CDK1 PRKDC TP53 CDC25C CCNB1	NO
BIOCARTA_GCR_PATHWAY	0.794118	0.991719	0.0659816	-0.280675	-0.790347	16	NOS3	NO
BIOCARTA_GH_PATHWAY	0.949735	1	0.0610364	-0.203325	-0.627603	23	IRS1 PLCG1 PRKCA SRF SHC1 MAP2K1	NO
BIOCARTA_GLEEVEC_PATHWAY	0.766026	0.981898	0.0477342	0.289801	0.788978	23	BAD STAT1 JAK2 FOS HRAS MAP2K4 PIK3CA MAP3K1	NO
BIOCARTA_GPCR_PATHWAY	0.462185	0.831127	0.102822	-0.307867	-0.983885	27	NFATC1 PLCG1 JUN PRKAR1B PRKCA ELK1	NO
BIOCARTA_GSK3_PATHWAY	0.903654	1	0.0418239	0.250947	0.643986	17	FZD1 MYD88 APC PPP2CA PIK3CA	NO
BIOCARTA_HCMV_PATHWAY	0.270764	0.675658	0.103576	0.456368	1.17114	17	MAPK14 SP1 MAP2K6 MAP2K3 MAP2K2 MAPK1 PIK3CA MAP3K1	NO
BIOCARTA_HDAC_PATHWAY	0.979112	1	0.0589694	-0.17613	-0.532195	21	NFATC1 CABIN1	NO
BIOCARTA_HER2_PATHWAY	0.514212	0.857081	0.0916795	-0.329792	-0.961696	19	GRIP1 ESR1	NO
BIOCARTA_HIVNEF_PATHWAY	0.417379	0.798694	0.0709609	0.312531	1.03185	56	LMNB1 FAS BIRC2 TNF CASP6 CASP3 BID CFLAR TNFRSF1A CASP8 BAG4 NFKBIA TNFRSF1B PSEN1 MAP3K5 RIPK1 PRKCD CDK11A CHUK MDM2 GSN FASLG PAK2 MAP3K1	YES
BIOCARTA_IGF1MTOR_PATHWAY	0.47619	0.836679	0.0714786	0.379163	0.984393	18	EIF4EBP1 PTEN EIF2S2 PPP2CA RPS6KB1 IGF1R PIK3CA GSK3B EIF4E EIF2S1 PDPK1 EIF2S3	NO
BIOCARTA_IGF1R_PATHWAY	0.998384	1	0.0359209	0.186655	0.498253	21	BAD PRKAR1A HRAS IGF1R MAPK1 PIK3CA PRKACB RPS6KA1 PRKAR2B GRB2 RAF1 YWHAH	NO
BIOCARTA_IGF1_PATHWAY	0.574742	0.89232	0.0852885	-0.308911	-0.916988	20	IRS1 JUN ELK1 SRF SHC1 MAP2K1	NO
BIOCARTA_IL12_PATHWAY	0.403941	0.788011	0.0799859	0.400646	1.04017	18	CD3D JAK2 IL18R1 MAPK14 IL18 IFNG CCR5 MAP2K6	NO
BIOCARTA_IL1R_PATHWAY	0.0424534	0.284866	0.321776	0.537801	1.51052	26	IL1RN IL1B IRAK3 IL1R1 MYD88 IL1RAP TNF MAPK14 NFKBIA MAP2K6 MAP2K3 CHUK	YES
BIOCARTA_IL2RB_PATHWAY	0.553707	0.880105	0.0601186	0.311818	0.947925	37	NMI SOCS3 BAD FAS FOS CFLAR SOCS1 HRAS CBL RPS6KB1 MAPK1 FASLG PIK3CA JAK3	NO
BIOCARTA_IL2_PATHWAY	0.425587	0.803386	0.103576	-0.336242	-1.01599	21	JUN ELK1 IL2RB LCK SHC1 IL2RA MAP2K1 IL2RG	NO
BIOCARTA_IL6_PATHWAY	0.942997	1	0.0389556	0.234734	0.620595	20	JAK2 CEBPB FOS HRAS IL6R STAT3 JAK3	NO
BIOCARTA_IL7_PATHWAY	0.73064	0.966619	0.052163	0.323954	0.820295	16	NMI PTK2B PIK3CA JAK3 EP300 STAT5A STAT5B IL7R IL7 CREBBP PIK3R1 PIK3CG	NO
BIOCARTA_INSULIN_PATHWAY	0.528351	0.864901	0.0899861	-0.320361	-0.950979	20	IRS1 JUN ELK1 SRF SHC1 MAP2K1	NO
BIOCARTA_INTEGRIN_PATHWAY	0.997041	1	0.0640704	-0.167906	-0.556552	30	JUN BCR RAPGEF1 SHC1 PPP1R12B MAP2K1 CAPN1 CAPNS1 CAPNS2 CSK MAPK8 FYN MAPK3 CAV1 SOS1 TLN1 CRKL VCL RAF1 GRB2 ACTN1 ROCK1 MAPK1 RHOA MAP2K2 ITGB1 RAP1A TNS1 HRAS	NO
BIOCARTA_KERATINOCYTE_PATHWAY	0.182081	0.560004	0.120433	0.387878	1.22395	43	FAS ETS2 EGF TNF MAPK14 FOS TNFRSF1A NFKBIA TNFRSF1B SP1 MAP2K6 MAP3K5 MAP2K3 RIPK1 PRKCD HRAS CHUK PPP2CA MAP2K4 MAPK1 FASLG	YES
BIOCARTA_LIS1_PATHWAY	0.992424	1	0.0567672	-0.164886	-0.456955	15	ABL1 DNAH8 DNAH1 DCTN1 CDK5R1	NO
BIOCARTA_MAL_PATHWAY	0.887043	1	0.0426734	0.262409	0.673398	17	CDC42 HRAS RAC1 MAP2K2 RHOA MAPK1 MAP3K1 ROCK1	NO
BIOCARTA_MAPK_PATHWAY	0.705479	0.954882	0.0443293	0.248731	0.873757	77	STAT1 MAP3K6 MAPK14 MKNK1 MAP3K13 FOS MAPK6 NFKBIA SP1 MAP2K6 TGFBR1 MAP3K8 MAP4K5 MAP3K5 MAP2K3 RIPK1 HRAS CHUK RAC1 MAP2K4 RPS6KB1 PAK1 MAP2K2 MAPK1 RPS6KA5 PAK2 MAP3K1 MAP3K3 RAPGEF2	YES
BIOCARTA_MCALPAIN_PATHWAY	0.787879	0.990036	0.0678338	-0.287013	-0.79541	15	CXCR3 PRKAR1B	NO
BIOCARTA_MCM_PATHWAY	0.00902731	0.119919	0.38073	-0.645037	-1.83898	17	ORC1 CCNE1 ORC6 CDC6 MCM2 MCM4 MCM7	NO
BIOCARTA_MEF2D_PATHWAY	0.409669	0.793929	0.104344	-0.354553	-1.02205	18	NFATC1 CABIN1 PRKCA MEF2D NFATC2 PPP3CC HDAC1	NO
BIOCARTA_MET_PATHWAY	0.360239	0.760327	0.0810802	0.368596	1.09175	32	DOCK1 HGF PTEN FOS CRK RAP1B HRAS RAP1A GAB1 ITGB1 PAK1 MAP2K2 STAT3 MAPK1 PTK2B PIK3CA	NO
BIOCARTA_MITOCHONDRIA_PATHWAY	0.547967	0.877949	0.0640704	0.356873	0.939302	19	BIRC2 DIABLO CASP6 CASP3 BID CASP8	NO
BIOCARTA_MPR_PATHWAY	0.957071	1	0.0584693	-0.209934	-0.581798	15	PRKAR1B CDK1 CDC25C CCNB1 PIN1 MAPK3 PRKAR2A PRKAR2B RPS6KA1 PRKACB PAQR7 MAPK1 CAP1 HRAS PRKAR1A	NO
BIOCARTA_MTOR_PATHWAY	0.455574	0.827989	0.0728939	0.378876	1.01136	21	EIF4EBP1 RHEB PTEN MKNK1 EIF4G3 PPP2CA RPS6KB1 EIF4A2 PIK3CA	NO
BIOCARTA_NDKDYNAMIN_PATHWAY	0.904412	1	0.0597318	-0.251962	-0.709495	16	DNM1 SYNJ2	NO
BIOCARTA_NFAT_PATHWAY	0.887283	1	0.0686326	-0.211636	-0.739554	36	FGF2 NFATC1 PRKAR1B CAMK4	NO
BIOCARTA_NFKB_PATHWAY	0.143322	0.494485	0.147331	0.494027	1.30612	20	IL1R1 MYD88 TNF TNFRSF1A TNFAIP3 NFKBIA TNFRSF1B RIPK1 CHUK	YES
BIOCARTA_NGF_PATHWAY	0.89	1	0.0614364	-0.255794	-0.729259	17	PLCG1 JUN ELK1 SHC1 MAP2K1	NO
BIOCARTA_NKCELLS_PATHWAY	0.0765472	0.3673	0.206588	0.536747	1.41906	20	B2M KLRC2 IL18 KLRC4 KLRD1 RAC1 ITGB1 PAK1 PTK2B PIK3CA KLRC3	NO
BIOCARTA_NKT_PATHWAY	0.765472	0.981898	0.048506	0.29418	0.777758	20	CCR1 IFNGR1 IL18R1 IFNGR2 IFNG CCL4 CCR5	NO
BIOCARTA_NO1_PATHWAY	0.403101	0.787672	0.106323	-0.349785	-1.02	19	NOS3 FLT1 PRKAR1B	NO
BIOCARTA_NTHI_PATHWAY	0.0455375	0.292612	0.321776	0.551222	1.50069	23	IL1B MYD88 DUSP1 TNF MAPK14 NFKBIA MAP2K6 TGFBR1 MAP2K3 CHUK	YES
BIOCARTA_NUCLEARRS_PATHWAY	0.973064	1	0.0390355	0.196272	0.496986	16	ABCA1 RARA ABCD3 VDR ABCC3	NO
BIOCARTA_P38MAPK_PATHWAY	0.505279	0.850897	0.0643583	0.323358	0.967785	34	PLA2G4A DDIT3 STAT1 MAPK14 MKNK1 MAP2K6 TGFBR1 MAP3K5 RIPK1 CDC42 HRAS RAC1 MAP2K4 RPS6KA5 HMGN1 MAP3K1 RAPGEF2	NO
BIOCARTA_P53HYPOXIA_PATHWAY	0.252019	0.658361	0.106323	0.441629	1.17887	21	IGFBP3 NQO1 HIF1A CDKN1A HSP90AA1 GADD45A HIC1 MDM2	NO
BIOCARTA_P53_PATHWAY	0.340909	0.745375	0.115734	-0.381219	-1.05649	15	CCNE1 CCND1	NO
BIOCARTA_PAR1_PATHWAY	0.9475	1	0.0584693	-0.232921	-0.664049	17	F2RL3 ARHGEF1 PRKCA	NO
BIOCARTA_PDGF_PATHWAY	0.992308	1	0.0338984	0.162042	0.46517	28	PDGFRA STAT1 FOS HRAS MAP2K4 STAT3 PIK3CA MAP3K1	NO
BIOCARTA_PML_PATHWAY	0.272727	0.677422	0.103958	0.459188	1.16273	16	FAS SUMO1 TNF TNFRSF1A TNFRSF1B SP100 RARA HRAS FASLG	NO
BIOCARTA_PPARA_PATHWAY	0.265786	0.6692	0.0972151	0.360073	1.14891	46	LPL PPARGC1A ME1 SRA1 DUSP1 TNF PTGS2 MRPL11 NFKBIA SP1 PRKAR1A HSP90AA1 NCOA1 NRIP1 MAPK1 PIK3CA ACOX1 EHHADH	YES
BIOCARTA_PTDINS_PATHWAY	0.975962	1	0.0366082	0.209425	0.570154	23	BAD LYN RAB5A AP2A1 AP2M1 RAC1 RPS6KB1	NO
BIOCARTA_PTEN_PATHWAY	0.476431	0.836679	0.0727141	0.391971	0.992523	16	FOXO3 PTEN ITGB1 MAPK1 FASLG PIK3CA GRB2 PDPK1 CDKN1B PIK3R1 ILK SOS1	NO
BIOCARTA_PYK2_PATHWAY	0.867395	1	0.0408229	0.254327	0.714325	26	MAPK14 CALM2 MAP2K3 HRAS GNAQ RAC1 MAP2K4 PAK1 MAP2K2 MAPK1 PTK2B MAP3K1	NO
BIOCARTA_RAC1_PATHWAY	0.162866	0.528721	0.137251	0.4826	1.27591	20	CHN1 PDGFRA WASF1 CDK5 PLD1 NCF2 RAC1 RPS6KB1 PAK1 PIK3CA MAP3K1	NO
BIOCARTA_RACCYCD_PATHWAY	0.803324	0.995901	0.0714786	-0.251491	-0.798357	26	CCNE1 CCND1	NO
BIOCARTA_RAS_PATHWAY	0.366987	0.764202	0.0838361	0.402913	1.08641	22	BAD PLD1 CDC42 HRAS CHUK FOXO4 RAC1 RHOA PIK3CA	NO
BIOCARTA_RELA_PATHWAY	0.151815	0.50923	0.143759	0.52572	1.32461	15	TNF TNFRSF1A NFKBIA TNFRSF1B RIPK1 CHUK	YES
BIOCARTA_RHO_PATHWAY	0.600515	0.907832	0.0828962	-0.305283	-0.906219	20	ARHGEF5 BAIAP2 ARHGEF1	NO
BIOCARTA_SPPA_PATHWAY	0.706271	0.955154	0.052805	0.328575	0.827881	15	PLA2G4A F2R TBXAS1 PLCB1 HRAS ITGB1 MAPK1	NO
BIOCARTA_SPRY_PATHWAY	0.886139	1	0.042417	0.268662	0.676924	15	EGF PTPRB SPRY3 HRAS CBL MAPK1	NO
BIOCARTA_STATHMIN_PATHWAY	0.988618	1	0.036685	0.196336	0.516762	19	CD3D RB1CC1 PRKAR1A	NO
BIOCARTA_STRESS_PATHWAY	0.417335	0.798694	0.0770737	0.378627	1.03962	24	TANK TNF MAPK14 TNFRSF1A NFKBIA MAP2K6 MAP2K3 RIPK1 CHUK MAP2K4	YES
BIOCARTA_TCR_PATHWAY	0.867742	1	0.0753094	-0.215835	-0.775438	43	NFATC1 PLCG1 JUN ZAP70 PRKCA ELK1 LCK SHC1 NFATC2 PPP3CC MAP2K1 CD247	NO
BIOCARTA_TEL_PATHWAY	0.914141	1	0.0606404	-0.242531	-0.672137	15	MYC PRKCA TP53 TNKS BCL2 AKT1 XRCC6 XRCC5 TEP1 RB1 TERF1 IGF1R KRAS PPP2CA HSP90AA1	NO
BIOCARTA_TFF_PATHWAY	0.415282	0.79783	0.0791317	0.401403	1.03009	17	BAD HRAS ITGB1 RHOA MAPK1 PIK3CA ERBB2 APAF1 GRB2 CASP9 PIK3R1 PIK3CG SOS1	NO
BIOCARTA_TGFB_PATHWAY	0.959288	1	0.0587186	-0.205681	-0.592905	18	ZFYVE9 TAB1 SMAD7	NO
BIOCARTA_TH1TH2_PATHWAY	0.7875	0.990036	0.0673624	-0.278727	-0.794639	17	HLA-DRB5 IL12RB2 CD40LG CD40 CD28 IL2RA HLA-DRB1	NO
BIOCARTA_TID_PATHWAY	0.0207512	0.195739	0.352488	0.652138	1.67353	17	LIN7A JAK2 IFNGR1 TNF IFNGR2 IFNG TNFRSF1A NFKBIA TNFRSF1B	YES
BIOCARTA_TNFR1_PATHWAY	0.947059	1	0.0662842	-0.209296	-0.681085	29	JUN SPTAN1 LMNA PARP1 DFFB MADD TRAF2 LMNB2 PRKDC	NO
BIOCARTA_TNFR2_PATHWAY	0.378738	0.770335	0.0840746	0.414022	1.06247	17	TANK DUSP1 TNFAIP3 NFKBIA TNFRSF1B RIPK1 CHUK	YES
BIOCARTA_TOB1_PATHWAY	0.37037	0.765729	0.0860347	0.424268	1.0743	16	CD3D TGFBR3 IFNG TGFBR1	NO
BIOCARTA_TOLL_PATHWAY	0.289922	0.694729	0.095288	0.409391	1.14413	25	TLR3 PGLYRP1 MYD88 TLR7 MAPK14 FOS NFKBIA MAP2K6 MAP2K3 CHUK MAP2K4	YES
BIOCARTA_TPO_PATHWAY	0.830128	1	0.044064	0.269965	0.734974	23	STAT1 MPL JAK2 FOS HRAS STAT3 PIK3CA	NO
BIOCARTA_VDR_PATHWAY	0.871589	1	0.0419082	0.255095	0.700433	24	COPS2 KAT2B CARM1 NCOA1 VDR	NO
BIOCARTA_VEGF_PATHWAY	0.224377	0.617628	0.154191	-0.366238	-1.16262	26	NOS3 FLT1 PLCG1 PRKCA ELAVL1 EIF2B4	NO
BIOCARTA_VIP_PATHWAY	0.652742	0.933107	0.0791317	-0.287029	-0.867286	21	NFATC1 PLCG1 MYC PRKAR1B	NO
BIOCARTA_WNT_PATHWAY	0.422977	0.803151	0.103958	-0.338165	-1.0218	21	CCND1 TLE1 MYC PPARD TAB1 CTBP1 DVL1 AXIN1	NO
BLALOCK_ALZHEIMERS_DISEASE_INCIPIENT_DN	0.180101	0.556855	0.111918	0.309395	1.16104	138	NDUFB3 MAOA SAT1 CLIC2 GLRX FKBP1B CKS2 MEF2A DRAP1 DNAJA1 FCER1G PPP3R1 GLUL COPS5 MXD1 USP15 ASPH CD59 COX7C RB1CC1 AP3S1 CSNK1G3 CDC27 PSMC2 CDK7 ELMO2 TMOD1 TFDP1 PPA1 KIF1B GTF2A2 REEP5 CCT2 PGS1 ROBO1 EIF2B3 APC ORC5 HSP90AA1 TOP1 PPP3CA ALDH2 COX7A2L CCNL1 LGALS8 DENND4A PDHX	NO
BLALOCK_ALZHEIMERS_DISEASE_INCIPIENT_UP	0.579418	0.895618	0.044064	0.235926	0.960032	320	NEBL HERC5 MYO10 TCN2 KCNK10 VCAN ZNF32 NAMPT F2R LIMK2 WWTR1 KAT2B LARP7 FBN2 CLIC1 ATG3 ZNF254 CR1 CCDC59 ITPRID2 DMC1 PRDX6 C5 SYF2 RGS9 PPIG ZNF350 RHOQ QKI TLR1 CTSS IL13RA1 SLC14A1 CTSL TGFBR3 IL18 RAB2A MRM3 ZNF268 PDGFB PLOD2 SPAG1 IFNG SYCP2 PLXNB2 GNAI3 RBM8A SEMA3B APOL2 CASP6 TSPAN31 CFLAR CD58 NEK7 RBPJ IL17RA SLC12A3 CALML4 SSR2 USP1 KTN1 ST6GALNAC4 GOLGA4 SP3 ITGA1 CAST TOPORS ARID…	NO
BLUM_RESPONSE_TO_SALIRASIB_DN	0.0166835	0.174154	0.352488	-0.256855	-1.23187	306	SDC1 CDC20 RIPK4 KIF2C RECQL4 NEK2 RRM2 UBE2C PLK1 ZWINT GAMT CCNB2 FOSB ORC1 CDC25A CDC45 ORC6 MOK RAB40B TRIP13 MEST CCNF LTBP3 BUB1 IRS1 RAD51 TIMELESS SNRPA1 CDC6 PTTG1 INCENP CENPF CDKN3 EXO1 MCM2 POLD1 KIF20A FASN MKI67 PLK4 SHMT1 CCNA2 PAFAH1B3 GINS2 KIF11 CHEK1 LMNA KIF4A PARP1 ISYNA1	NO
BLUM_RESPONSE_TO_SALIRASIB_UP	0.0177812	0.181399	0.352488	0.345226	1.36154	217	RSL24D1 CSTA RIOK3 ATF3 ISG20 TIMM9 NAMPT SIAH2 FOXO3 SLC1A5 LIPT1 BIRC2 EIF4EBP1 BACH1 AZI2 RNF14 BLVRB MTHFD2 RAB32 LRP1 BCAT1 EIF1B RNF13 CASP4 RNF7 CTSL LAPTM4A CD55 RAB5A SERP1 DNAJC1 CDK7 ZYX ATF6 IFRD1 MAP1LC3B PTP4A2 TNFAIP3 RRAGC BUD31 MAPK6 NFKBIA NINJ1 SPHK1 PPP2R5B GOLGA4 POLI PTX3 PSEN1 SUCO UBE2H USP25 NIT1 DUS4L NSMAF CDKN1A EIF2S2 SCFD1 EIF1 STK19 BTG1 CEBPG PEA15 SIAH1 GADD45A CO…	YES
BOCHKIS_FOXA2_TARGETS	0.0163345	0.173129	0.352488	0.325791	1.32542	315	RETN INSC CHMP5 RPL21 ATP5PF COLEC12 GAS1 HMGB2 ISG15 PDK4 DPM1 EIF1AY TMEM121B SORT1 TIMM9 PEMT CES1 UBE2L6 ACSL1 RASSF6 HGD SERPINA1 GK CHAC2 FGL2 PIK3AP1 LRG1 C1R MRPL36 STARD13 PROS1 ABCA1 LYN MERTK GNL3 MXD1 NQO2 HAGH ITIH1 CD300LF SERPINF2 PRDX6 DRAM2 IFI27L2 ZDHHC17 NDUFA2 LRP1 FBXO4 SLC6A12 NFU1 JUNB AP3S1 FTL STARD5 TMEM140 PRXL2C EFNA1 PLOD2 CDK5 HPS1 TSEN15 GDE1 TNFRSF1A PLIN2 DCAF13 C…	NO
BOGNI_TREATMENT_RELATED_MYELOID_LEUKEMIA_DN	0.117117	0.449	0.227987	-0.382321	-1.27768	32	FSCN2 HLA-DQB1 CCND1 PPT2	NO
BOGNI_TREATMENT_RELATED_MYELOID_LEUKEMIA_UP	0.264423	0.668913	0.102822	0.42597	1.15969	23	RPL17 RPL11 HP RPS27A CXCR1	NO
BOHN_PRIMARY_IMMUNODEFICIENCY_SYNDROM_DN	0.567322	0.887913	0.0589694	0.30889	0.939025	37	PLSCR1 SMCO4 ASAH1 TLR7 HCK DUSP1 CTSH TNFSF10 RRAGC DPYD SORL1 LST1 TOP1 SUSD6 BMP2K F13A1 CDKN2A	NO
BOHN_PRIMARY_IMMUNODEFICIENCY_SYNDROM_UP	0.493548	0.847596	0.107554	-0.27228	-0.978228	43	GLDC UBE2C P2RX5 MKI67	NO
BONCI_TARGETS_OF_MIR15A_AND_MIR16_1	0.0324879	0.255314	0.321776	-0.359798	-1.42444	73	SOX5 FGF2 HSPG2 KCNQ5 CCNE1 CDC25A SPEG CCND1 EFNB2 WEE1 PCDH9	NO
BONOME_OVARIAN_CANCER_POOR_SURVIVAL_DN	0.0241615	0.214425	0.352488	-0.54034	-1.57567	19	PAOX ACOT7 IL18BP EHMT2 SRRT PPAN BOP1 ASPSCR1 TWNK CLN6 HDHD3 FCHO1 HNRNPU GRK6 MTAP	NO
BONOME_OVARIAN_CANCER_POOR_SURVIVAL_UP	0.00591492	0.0891092	0.407018	0.620163	1.70282	24	KL LEPR TAX1BP1 RB1CC1 RAB2A THSD7A EID1 CCPG1	NO
BONOME_OVARIAN_CANCER_SURVIVAL_OPTIMAL_DEBULKING	0.21697	0.607365	0.0978773	0.290637	1.13005	188	NDUFB3 BBOF1 PLSCR1 SAT1 STK32B ISCA1 ISG20 ANXA1 ANXA9 RBX1 NDUFA1 CKLF MCTS1 BAG1 ZNF354A MYL12B CLIC1 PDCD1LG2 TRPC6 ZFAND6 IFI16 TECPR2 CMTM6 WASF1 MCTP1 OPTN SLC14A1 FLOT1 TDP2 VAMP8 ARPC2 MAD2L1BP GADD45GIP1 ITSN1 NDUFS6 IQGAP1 SPTLC2 GAA TMEM8B PLAGL1 RAB11A SP100 PCTP GMPR RHOBTB3 STK19 DAAM1 ACOT13 COQ2 SACS	NO
BONOME_OVARIAN_CANCER_SURVIVAL_SUBOPTIMAL_DEBULKING	0.641409	0.92778	0.0372254	0.227299	0.940156	398	CAMK2N1 IGFBP3 PEG3 COL13A1 SPOCK1 KL LPAR1 ABCG2 MYOF PLPP3 F8 MAOA FRMD4A BNIP3L EPB41L3 SEMA3C IRAK3 STOM LEPR IGF2 F2R PDGFRA CDYL UBE2B FOXO3 AKAP7 KAT2B DNAJB4 CALCOCO2 ASAH1 TAX1BP1 GAS2L1 TFPI MERTK CR1 SNX3 AZI2 BTF3 MORC3 BST1 FBXL5 CD302 ADAM15 RAB6A RNASE4 PDGFD SNX2 CDKN2D RB1CC1 ATP8B4 WBP4 SPI1 RAB2A RAP2A THSD7A NADK SPRED2 FKBP8 EID1 CCPG1 JRKL RHOT1 ALOX5 ATP6V1C1 CSGALNACT2 ZFY…	NO
BOQUEST_STEM_CELL_CULTURED_VS_FRESH_UP	0.0341297	0.260823	0.261664	0.319295	1.28828	287	CCL8 TNFAIP6 RPL26L1 MYO10 PEG3 GEM CLEC2B LPL COLEC12 HBA1 MAFB AKR1C1 PDK4 MAOA CLIC2 ATF3 CFH CES1 PTGDS CXCL10 GADD45B NAMPT SPATA6 SRGN TLR3 IFITM1 PFKFB3 FGL2 PLBD1 PMAIP1 RGS2 ME1 BST2 CYP1B1 TFPI MYBL1 CYP26B1 NQO1 MTUS1 CDC42EP3 TMEM176A ADAM12 RGS5 SLC2A3 CD302 CTSS ETS2 CXCL1 SELENBP1 DUSP1 WSB2 JUNB TGFBR3 FRMD4B RNASE4 KLF4 HSPA6 SORBS1 ATP8B4 GSDME PELI1 GLIPR1 TNFSF10 GBP2 TXNIP CD…	NO
BOQUEST_STEM_CELL_DN	0.0419236	0.283343	0.245042	0.352755	1.34494	159	MYO10 KL ERG ANXA3 LPAR6 NRN1 GMFG PCDH12 ZNF385D GNG11 STX11 ISG20 IL15 ACKR1 TACSTD2 AQP1 IFI44L SRGN LIMK2 ENPP4 CLEC1A G0S2 LMO2 TSPAN6 CA4 CCRL2 MYCT1 BST2 DUSP6 CDC42EP3 THBD PTPRM MCTP1 CSF2RB ETS2 KLHL2 CTSH CAVIN2 IL18R1 THSD7A PTPRB EFNA1 PTPRE TBC1D30 SPTLC2 CFLAR PDE2A TEK TNFRSF1B PGS1 CARD8 RCAN1	NO
BOQUEST_STEM_CELL_UP	0.012102	0.143366	0.38073	0.39764	1.48736	129	TNFAIP6 C3 IGFBP3 SPOCK1 MEG3 COLEC12 LPAR1 SGCD GAS1 MAFB AKR1C1 CFH VCAN CES1 FAT1 HNMT LSP1P4 SEMA3C PTGDS PLA2G4A PDGFRA BASP1 PTPRG PLBD1 C1R CEBPB PID1 AXL LRP1 CD302 RNASE4 PDGFD ATP8B4 NOTCH2 KIAA0930 MITF WDR41 MME DSE CRISPLD2 CFD ROBO1 DDR2 NBPF10 PLAGL1 PTX3 C5orf15 PTPN13 ANPEP RHOBTB3 TMEM176B	NO
BORCZUK_MALIGNANT_MESOTHELIOMA_DN	0.0798543	0.373355	0.287805	-0.339891	-1.32534	65	RAPGEF3 FSCN2 CD22 CD19 CD79A C11orf80 AGFG2 RDH16 CD38 FCER2 CD79B PPT2 VILL MS4A1 PCSK7 CD6 PNOC FCMR RAD9A ACAP1 TRAF1	NO
BORCZUK_MALIGNANT_MESOTHELIOMA_UP	0.0295119	0.241629	0.282013	0.322044	1.30063	289	DBI DOCK1 CDC42BPA CCNE2 METTL18 VBP1 BLVRA DYNLT3 TRIAP1 F2R HPRT1 RFC4 PSMA2 SAP30 CKS2 DNAJA1 LDOC1 COPS5 RCN2 UBE2D1 PCMT1 PIGC RP2 SRPK1 MRPL3 RAB32 CBX3 MPZL1 LAMTOR5 QKI S100A11 TUBA1A VAMP3 UBE2E3 WSB2 CENPS VAMP7 UBE2D3 RIT1 CDC27 CDK7 SEC61G TFDP1 DENND5A MPC2 HDGF ELOC VRK2 CCZ1 LPGAT1 GTF2A2 PGRMC1 ITGAV TMED7 KRT10 PTGES3 CCT2 SNRPF MSMO1 SEC24D RAP1B RCOR1 LAMP2 MOB1A RHOBTB3 TMEM18…	NO
BORLAK_LIVER_CANCER_EGF_UP	0.63583	0.924989	0.0522693	0.276751	0.883049	46	LPL PLSCR1 ATF3 TCEAL9 SLC7A7 TLR6 RBM3 S100A11 ETS2 JUNB CD63 BEX2 FOS SPP1	NO
BOSCO_ALLERGEN_INDUCED_TH2_ASSOCIATED_MODULE	0.5	0.849611	0.131458	-0.226267	-0.980801	135	JCHAIN LRFN2 NRCAM PLLP DACT1 IKZF4 BCL9L IRF4 CDCA7L CNKSR2 FLT3LG FCER2 CSF1 SEMA7A RAB30 TAF4B PLXDC1 CEACAM1 MAL FOXP3 SLC12A2 CD83	NO
BOSCO_EPITHELIAL_DIFFERENTIATION_MODULE	0.59772	0.906863	0.0599892	0.339936	0.89873	20	LCN2 ANXA9 TACSTD2 TSPAN6 H19	NO
BOSCO_INTERFERON_INDUCED_ANTIVIRAL_MODULE	0.0401107	0.277841	0.266351	0.40609	1.41569	74	HERC5 TNIP3 RSAD2 IFIT1 RIN2 P2RY14 PNPT1 LILRB1 MS4A6A IFI44L IFIT5 NUB1 TRAFD1 OAS3 TMEM176A DDX60	NO
BOSCO_TH1_CYTOTOXIC_MODULE	9.49863e-05	0.00429296	0.538434	0.519026	1.84792	89	CCL8 HESX1 FAM20A IL4I1 FFAR3 CD163L1 ISG15 ANKRD22 CALHM6 DPCD IL15 STAB1 TSHZ3 CXCL10 RNASE2 F2R FBXO39 GBP6 CD300E CMKLR1 MERTK MYBL1 GZMB GAS6 GIMAP7 ITGA9 SH2D1A IFNG RGL1 IL15RA SOCS1 STRIP2 CDC7 CCR5 ADORA3 GPR171 DNA2 KLRD1 RHBDF2 FCGR2B RTP4	NO
BOUDOUKHA_BOUND_BY_IGF2BP2	0.107527	0.43064	0.155242	0.358407	1.27275	84	NDUFA1 VBP1 EPB41L3 ROMO1 ABRACL VPS29 RAB31 S100A6 AK1 TSPAN5 EMC6 ATP5F1E COX7C VAMP8 PTPN12 TRIP6 IQGAP1 MAP1LC3B RPL22 VTI1B ISCA2 VPS26A LXN FAU EPS8 ATP6V0C LSM5 LBR DYNLL1 FAM89B NACA SDF2 CUX1 ATP5MF SEC61B VPS54 CCNG1 KIF3C NDRG1 HIGD2A NAPG	NO
BOWIE_RESPONSE_TO_EXTRACELLULAR_MATRIX	0.0255642	0.220032	0.352488	0.642005	1.62564	16	ISG15 IFIT1 IFITM1 STAT1 PSMB9 IFNGR1 IFI16	NO
BOWIE_RESPONSE_TO_TAMOXIFEN	0.124585	0.462873	0.160801	0.526263	1.35051	17	ISG15 IFIT1 IFITM1 STAT1 IFNGR1 IFI16	NO
BOYAULT_LIVER_CANCER_SUBCLASS_G123_DN	0.644578	0.92927	0.052805	0.295489	0.880677	33	RIDA F8 FAS SLC6A12 ST3GAL6 ACAA2	NO
BOYAULT_LIVER_CANCER_SUBCLASS_G123_UP	0.41358	0.796619	0.116234	-0.280459	-1.02342	45	ENAH PEG10 CCNB2 GINS1	NO
BOYAULT_LIVER_CANCER_SUBCLASS_G12_UP	0.584592	0.899727	0.0574877	0.304858	0.918781	35	NUAK1 PIGC HSPA14 WDR26 RAP2A EFNA1 LPGAT1 YY1AP1 TMEM183A	NO
BOYAULT_LIVER_CANCER_SUBCLASS_G1_DN	0.792738	0.991719	0.0435378	0.257914	0.784058	37	GLRX TLR3 KAT2B CTSB TMED5 ABHD2 CTBS SLC39A8 GADD45A SDHB GCLC DGLUCY	NO
BOYAULT_LIVER_CANCER_SUBCLASS_G1_UP	0.770642	0.983603	0.0382417	0.232899	0.848999	106	RPL17 PEG3 NRXN3 TLR5 RBFOX2 IGF2 MPZL1 ADAR ZNF468 UBAP2 NTAN1 PLXNA2 RBM8A PAIP1 CCZ1	NO
BOYAULT_LIVER_CANCER_SUBCLASS_G2	0.0215892	0.199607	0.352488	0.573389	1.61047	26	SATB2 INHBB MCTP1 MOSPD1 KIF14 CD58 DEGS1	NO
BOYAULT_LIVER_CANCER_SUBCLASS_G23_UP	0.861968	1	0.0383206	0.233911	0.746356	46	DNAJC6 CCNE2 TWF1 TFPI IGF2BP3 TFRC XK USP1 RRAGD NARF SLC39A6 PTH2R SUZ12 TMEM251 MAPK1 ARPC1A COCH MEMO1 ECT2	NO
BOYAULT_LIVER_CANCER_SUBCLASS_G3_DN	0.615385	0.915327	0.0891647	-0.271634	-0.913341	33	GAMT SARDH SERPING1 TMEM204 CYP27A1 FMO4	NO
BOYAULT_LIVER_CANCER_SUBCLASS_G3_UP	0.682039	0.944427	0.0403295	0.233789	0.906109	182	POLR2K RAD51AP1 MARCKS PSMC6 SNRPD2 ZWILCH CKLF TXN VMP1 CLIC1 SUB1 COPS5 DUSP3 GNL3 CBX3 TMX1 FTH1 RIT1 TPRKB UGCG PLOD2 SEC61G GOLT1B KPNB1 ELOC PTP4A2 ASAP1 KIF1B SLC16A3 PTGES3 CCT2 GMFB PAK1IP1 NDC80 PRKAR1A JPT1 EZH2 UBE2V2 NPEPPS FAM50A TPD52L2 CSDE1 PGK1 ARPC4 PGD AIMP1 RPRD1A UTP18 GPN1 NRAS NDRG1 ANP32E MMD PPP1CC C5orf22 GLA DR1 LRP12 PAPOLA PPP2R3C TIPIN PTBP2 ADSL TOPBP1 PRIM1 USP3 E…	NO
BOYAULT_LIVER_CANCER_SUBCLASS_G5_DN	0.018208	0.184129	0.352488	0.557597	1.5822	27	CLEC2B STAT1 RAB31 BCL3 IFI16 ICAM1 S100A11 PELI1 THEMIS2 HMGN3 SIRPA CYBA	NO
BOYAULT_LIVER_CANCER_SUBCLASS_G6_DN	0.739203	0.971416	0.0510114	0.311992	0.80064	17	CDH1 CMTM6 SDC4 TNFSF10 SLC20A1 RAB27A TNS1 INPP1 AGO2 NUP98	NO
BOYAULT_LIVER_CANCER_SUBCLASS_G6_UP	0.690304	0.948616	0.04783	0.264766	0.862824	51	SIAH2 WASHC3 TCEAL1 MERTK SLC22A4 TIMM17A NEK3 FBXL5 AP3S1 ACSS3 RNF43 HSDL2 MME TBCA GALNT1	NO
BOYLAN_MULTIPLE_MYELOMA_C_CLUSTER_DN	0.0842434	0.379048	0.191892	0.493278	1.38546	26	SAT1 SERPINB1 CD69 AIG1 B4GALT6 TRIM34 PTPN22 SPP1 KLF6 RAB20 IRS2 SLC7A11 NRIP1	NO
BOYLAN_MULTIPLE_MYELOMA_C_CLUSTER_UP	0.455882	0.82804	0.10673	-0.302731	-0.985136	29	FOXP4 ZFPM1 RAG1 CAD UHRF1	NO
BOYLAN_MULTIPLE_MYELOMA_C_DN	0.0951009	0.402388	0.172324	0.40538	1.31756	50	CYSTM1 MYOF SAT1 SERPINB1 C3orf33 TNFRSF21 ZC2HC1A DOCK5 AIG1 RNF43 PLOD2 MAP9 B4GALT6 SPP1 KIF13A KLF6 SLC30A1 ATXN1 RAB20 TANC1 LAPTM4B IRS2 NRIP1	NO
BOYLAN_MULTIPLE_MYELOMA_C_D_DN	0.00017529	0.00698569	0.518848	0.416221	1.65419	231	S100A8 CD177 CRISP3 SLPI C3 MMP8 P4HA2 S100A9 OLFM4 GZMA HBA1 MS4A4A PLSCR1 CSTA MCEMP1 IL18RAP HP ISG20 LCN2 NFIL3 P2RY14 TENT5C GCA LILRB3 SEMA4A LILRA5 PRLR TBC1D8 RNASE2 MFSD4A CD3D F2R IFITM1 RGS18 ITPRIPL2 FPR1 LYZ GBP6 BASP1 MNDA FGL2 PLEK LRG1 CAMP PGLYRP1 MGAM SLCO4C1 LTF IGSF6 TSPAN2 TMEM176A KLRK1 CPEB3 GRAMD1B RAPH1 PRDM1 PLIN3 CLEC4E IL13RA1 SLFN12 FNDC3B IL18R1 SLC41A2 PYGL ELANE EN…	NO
BOYLAN_MULTIPLE_MYELOMA_C_D_UP	0.0138882	0.155456	0.38073	-0.323753	-1.37039	118	DIRAS1 CCDC85C PAX5 OTUB2 EBF1 KIF7 ID3 AFF3 BAMBI ACY1 INCENP BACH2 FAM43A BCL11A PDLIM1 SHMT1 SCARB1 ESCO2 CROCC AMZ1 TMEM143 CTH MTHFD1 BCL7A SIVA1 ANKRD37 PKIG GCN1 NAT8L DDX19B CHCHD6 TRIM2 PTPRS RHOH SLC29A1 SMPD4 SBK1 AGPAT5	NO
BOYLAN_MULTIPLE_MYELOMA_C_UP	0.00346888	0.06378	0.431708	-0.493908	-1.73111	38	EBF1 FOXP4 VPREB3 ZFPM1 ASB2 SPIB CAD FAM110A CARMIL1 RBKS ETS1 ARVCF ZMYND19 LRIG1 MCM3 STX2 FAM53B MTOR CSTF1 MARCKSL1 DHX38 CPSF6	NO
BOYLAN_MULTIPLE_MYELOMA_D_CLUSTER_DN	0.866864	1	0.0709609	-0.227719	-0.760435	31	PHKA1 ASB2 CEP250 CUL7 PPP1R16B	NO
BOYLAN_MULTIPLE_MYELOMA_D_CLUSTER_UP	0.335979	0.740013	0.119888	-0.348013	-1.07421	23	PLLP OBSCN CCND1 NEFH CLYBL PPP1R13B MXRA8 PLCH1 N6AMT1	NO
BOYLAN_MULTIPLE_MYELOMA_D_DN	0.472376	0.835305	0.0633597	0.286935	0.995383	71	MARCKS STK3 CASP1 HNRNPLL S100A6 CYBB BCL3 ARHGAP26 LILRA6 IFI27L2 CD52 HSD17B11 CCDC88A ABTB2 DDX3Y CHST15 CYTH4 PIWIL4 ITGAM LGALS1 FLOT2 ARAP2 CGAS NFKBIE NCF1 CTNNA1 DRAM1 TMEM141 AHNAK GSN TIFAB	YES
BOYLAN_MULTIPLE_MYELOMA_D_UP	0.432877	0.80933	0.0672065	0.289567	1.01721	77	ARL4A ADM TIMM9 PLK2 ARHGAP29 PRSS23 DDIT3 SPIRE1 BCAP29 GGCT BACH1 AGTPBP1 USP15 BLVRB ASPH RRM2B PPM1A CHST7 AFAP1 SLC15A3	NO
BOYLAN_MULTIPLE_MYELOMA_PCA1_UP	2.83609e-05	0.00158234	0.57561	0.517693	1.86643	96	S100A8 CD177 CRISP3 C3 S100A9 HBA1 MS4A4A PLSCR1 CSTA HP ISG20 LCN2 TENT5C LILRA5 PRLR RNASE2 MFSD4A CD3D F2R IFITM1 FPR1 LYZ GBP6 BASP1 MNDA FGL2 LRG1 CAMP PGLYRP1 LTF IGSF6 TMEM176A CPEB3 PLIN3 SLFN12 IL18R1 ELANE GPR160 CCR2 DDX3Y CACNA1H WIPI1 FYB1 TGFBI CTSW CXCR6 ITGA1 CCL5	NO
BOYLAN_MULTIPLE_MYELOMA_PCA3_DN	0.46077	0.831127	0.0661326	0.3061	1.01051	54	RSPH9 MARCKS KNDC1 STK3 STOM CASP1 TSPAN2 BST1 DDX3Y CYTH4 MYL9 TNNI2 FLOT2 APC LXN CTNNA1 GSDMD TMEM141 ECI2 GSN TIFAB	NO
BOYLAN_MULTIPLE_MYELOMA_PCA3_UP	0.658228	0.936737	0.0487011	0.263792	0.889452	62	PPARGC1A ATF3 PLK2 SERPINB1 PLA2G4A PRSS23 CD69 CCDC126 GPR65 LGALSL TFPI AIG1 RNF43 ABTB2 ACOXL KIF13A SLC30A1 TLN2 ATXN1 RAB20 LAPTM4B RRAGD CCDC91 NRIP1 ALCAM MTHFD2L	NO
BRACHAT_RESPONSE_TO_CAMPTOTHECIN_DN	0.291852	0.697513	0.0922597	0.365914	1.12641	39	BNIP3L EMC2 FKBP3 IFITM1 BAD TAX1BP1 HIGD1A SSB HIKESHI AK4 HMGCS1 OSTF1 PSAT1 RPL3 SLC44A2 IFITM3 ANP32E PLAC8	NO
BRACHAT_RESPONSE_TO_CAMPTOTHECIN_UP	0.266026	0.6692	0.102449	0.425752	1.1591	23	LRRC2 C1R TRAFD1 ZFP36L1 TXNIP TPP1 CDKN1A	NO
BRACHAT_RESPONSE_TO_CISPLATIN	0.308562	0.715058	0.0940503	0.421547	1.12527	21	LILRA5 NABP1 VMP1 ASNSD1 TXNIP CDKN1A ADGRE1 ISOC1 MDM2 CCNG1 YPEL3	NO
BRACHAT_RESPONSE_TO_METHOTREXATE_DN	0.254808	0.660956	0.105125	0.4311	1.17366	23	BNIP3L FKBP3 IFITM1 HIGD1A EMILIN2 HIKESHI AK4 HMGCS1 OSTF1	NO
BRACHAT_RESPONSE_TO_METHOTREXATE_UP	0.237785	0.638248	0.110565	0.450534	1.19113	20	LILRA5 LRRC2 VMP1 TRAFD1 ZFP36L1 TXNIP CDKN1A ADGRE1 MDM2	NO
BREDEMEYER_RAG_SIGNALING_NOT_VIA_ATM_DN	0.41116	0.79447	0.0732559	0.32476	1.03623	46	SLPI RIOK3 RGS18 SNX10 ABCA1 TSPAN2 ASPH IFT22 CACNA1H	NO
BREDEMEYER_RAG_SIGNALING_NOT_VIA_ATM_UP	0.504965	0.850897	0.0614364	0.295141	0.977199	55	CNRIP1 C3orf14 BLOC1S2 CTSE SLC5A9 PIK3AP1 PRELID2 SH3RF1 NOTCH2 PAIP1 SLC20A1 CD244 CCR5 RCAN1	NO
BREDEMEYER_RAG_SIGNALING_VIA_ATM_NOT_VIA_NFKB_DN	0.630058	0.921563	0.08654	-0.255098	-0.891428	36	HLA-DQB1 PHKA1 BHLHE41 TAF4B RNF157 POMT1 TMEM254 ACP5 SSPN CENPC TGFBRAP1 ANK3 MPZL2 CDK5RAP1	NO
BREDEMEYER_RAG_SIGNALING_VIA_ATM_NOT_VIA_NFKB_UP	0.0953757	0.403129	0.172324	0.421	1.32846	43	IFT81 COLEC12 RAB39A PRRG4 AKR1E2 CYBB LDLRAD3 THBD IGF2BP3 FGGY SLC20A1 GOLM1 ACER3 TMEM71 MAP3K8 TCAIM PKD2	NO
BREUHAHN_GROWTH_FACTOR_SIGNALING_IN_LIVER_CANCER	0.348837	0.752558	0.115734	-0.366019	-1.06734	19	DACT1 IRS1 AXIN2 MET SMAD7	NO
BRIDEAU_IMPRINTED_GENES	0.303681	0.710686	0.138022	-0.306879	-1.09504	40	PEG10 NDN MEST MKRN3 CD81 SNURF PPP1R9A DHCR7 SGCE ATP10A KCNQ1 NAP1L5 SNRPN	NO
BROCKE_APOPTOSIS_REVERSED_BY_IL6	0.00556846	0.0859711	0.407018	0.408628	1.52803	132	MAP1B EVI2A PLSCR1 DPM1 MARCKS NMI SOCS3 GADD45B NAMPT AP1S2 PDGFRA FOXO3 TWF1 STAT1 PTP4A1 TXNDC9 PTPRG EVI2B BCL3 DUSP3 IFNGR1 RCN2 CEBPB GAS6 HCK ICAM1 PRDM1 RNF13 SLC2A3 SLC16A6 POLR3F FLOT1 JUNB LITAF ST3GAL6 TNFSF10 MT1X BCL6 CCNC SLA SBNO2 ZFP36 SOCS1 SPP1 CHST15 WIPI1 TMED7 CDK17 MSMO1 GNA13 MCL1 IRF9 MAP3K8 BCL2L11 RHOBTB3 VWA5A	NO
BROWNE_HCMV_INFECTION_10HR_DN	0.484581	0.842525	0.0650878	0.311091	0.992617	46	TCF7L2 B2M RIN2 GEMIN2 ARHGAP29 MTUS1 IGF2BP3 EEF1A1 RANBP6 RBMS1 ZNF23	NO
BROWNE_HCMV_INFECTION_10HR_UP	0.410959	0.79447	0.0697793	0.292463	1.02738	77	CCL8 CCNE2 MNDA RGS2 IL1RAP SERPINI1 ASCL2 DNAJC3 NXT2 JUNB GBP2 TAF13 FKBP5 PTPRE LIG4 ATP6V1C1 SLC6A8 RMND5A NCF2 CCL5 BCL2L11 CGRRF1 TOP1 SLC7A5 RSRP1 SUSD6 DNAJB6 NUP58	NO
BROWNE_HCMV_INFECTION_12HR_DN	0.266943	0.669842	0.0934449	0.321727	1.12159	74	ZNF415 DLC1 RIN2 SERPINB1 IGF2 TBC1D8 RIN1 PDGFRA PTP4A1 PMP22 TSPAN5 TUBA1A HNRNPH3 UGCG PAIP1 ACSL3 DENND3 WDR45 MAP3K5 VWA5A GZMK ATXN1	NO
BROWNE_HCMV_INFECTION_12HR_UP	0.519894	0.860769	0.0568864	0.269263	0.970767	96	MMP14 PLSCR1 STX11 KIAA0895 IFI44L B4GALT5 RBM38 GK TLR2 SRP19 TAP1 RNF19B THEMIS2 MAP3K13 ZNF184 IFRD1 PLAGL2 SLC6A8 IL17RA TRIM21 OLFM1 ZNF443 MFAP3L CGRRF1 MTF1 ZNF37A RRAGD C18orf25 MAP2K4 ARRB2 STAM2 TESK2 GPD2 POLR2C TLE3 HAUS3 ZFY RAB5C	NO
BROWNE_HCMV_INFECTION_14HR_DN	0.387921	0.77661	0.0645031	0.262081	1.03919	223	FGF13 NLGN4Y MYO10 OLFM4 LPAR1 SGCD GAS1 TCF7L2 PLPP3 DTNA DYNC2LI1 GNG11 MARCKS GLRX APOBEC3B CASP1 PDGFRA LIMK2 SPTB FAS G0S2 MT1E	NO
BROWNE_HCMV_INFECTION_14HR_UP	0.644304	0.92927	0.0448645	0.24457	0.916469	136	RPIA CCNE2 CCNA1 PTGDS FZD5 SIAH2 MNDA CALCRL ZNF230 MORC3 SYNJ1 TSC22D3 SPAG1 BAZ1A DDX3Y TRIM23 FOS ZNF200 ATP6V1C1 AMD1 USP1 PPP2R2A HLA-F ZNF20 CGRRF1 EIF4EBP3 CEBPG THUMPD1 TOP1 ATP6V0B TFEC DDX3X SLC7A5 SNHG29 POLR2H RSRP1 RCC1 JMJD6 GCLC ZNF44 HMOX1 NEU1 GPM6A KLHL18 ANP32E SMURF1 IP6K1 GLA UBN1 NDEL1 HERPUD1 RGS19 FICD POT1 BRMS1 GCLM MAX SYNE2 PPM1D ZNF143 HIPK1 TAF5 GRPEL1 DBF4 NXF1 MED…	NO
BROWNE_HCMV_INFECTION_16HR_DN	0.566714	0.887403	0.05653	0.285039	0.94251	57	CACNA1E COL13A1 NRP1 SEMA3A CHN1 AKR1C3	NO
BROWNE_HCMV_INFECTION_16HR_UP	0.612864	0.914436	0.0452247	0.23952	0.93044	187	PLSCR1 BPGM MAOA ARL4A TEX30 SAP30 GK STIL GTF2B LYN IFNGR1 NAT1 NXT2 TBC1D12 NFE2L3 RNF19B RAB5A RAP2A TFRC TAF13 FKBP5 MAP3K13 PTPRE CCNC IGF2R THAP12 SLC6A8 PLS1 GNA13 PPP2R5B RMND5A OLFM1 ALKBH1 CHD1 E2F6 WDR47 ZNF37A STBD1 PRKCD KCNH2 ZBTB6 POLR2H CLCN5 C18orf25 N4BP2L1 ABHD3 SUZ12 RNF2 TESK2 PLAAT4 ZNF131 VLDLR SEC23IP CDKL5 ZFY ST7 PLEKHB2 SSR1 CLPX CDC40 DR1 PTGER2 TMF1 ETFDH ZBTB1 SRSF10…	NO
BROWNE_HCMV_INFECTION_18HR_DN	0.309585	0.716106	0.0815265	0.291977	1.07496	120	FGF13 P3H3 SGCD B2M RIN2 GNG11 VCAN CRHBP IGF2 DEFA1 VAMP5 GAS6 AXL ADAM12 DUSP1 ETV6 RDH5 PTEN FKBP8 SEMA5A IFNG CTSO	NO
BROWNE_HCMV_INFECTION_18HR_UP	0.953608	1	0.0959207	-0.182525	-0.8107	151	WNT11 SLC29A2 ZWINT E2F5 GPRC5B LAMA5 ZNF821 TNFRSF17 RAB33A HSD17B6 OVGP1 NELFA PDIA4 ADGRL1 MET RASGRP1 ZHX2 CD83	NO
BROWNE_HCMV_INFECTION_1HR_DN	0.895288	1	0.100633	-0.191919	-0.857755	159	MPPED2 CCNE1 PHKA1 ESM1 BLK TBXA2R CLDN7 SBF1 BCS1L CBY1 MYL5 MAD1L1 PCSK7 CUBN GABBR1 ICA1 PPARD ZFYVE9 POLG PTGDR2 PPFIBP2 MORC2 FCMR RNF216P1 IMP4 ETS1 LYRM9 POLD2 F2RL1 NAA80 HIC2 GPR19 SEC16A ZNF135 S1PR1	NO
BROWNE_HCMV_INFECTION_1HR_UP	0.54142	0.873223	0.096563	-0.285527	-0.946424	30	SIK1 SOX5 FSCN2 VAT1 MAZ PPP1R13B RASGRP1	NO
BROWNE_HCMV_INFECTION_20HR_DN	0.620968	0.916721	0.0492918	0.256975	0.907672	80	FOLR3 ANXA1 TMEM158 GLRX TBC1D8 F2R PMP22 TFPI SLC22A4 NQO1 IGF2BP3 AXL TGFBR3	NO
BROWNE_HCMV_INFECTION_20HR_UP	1	1	0.0202691	0.163618	0.639406	192	NEFL HCN2 LCN2 ZNF267 B4GALT5 CCR1 SIAH2 TEX30 EDA DNAJA1 LYN DUSP3 RAP2C PCDHGA12 ETS2 CDC34 RNF19B RAB5A RAP2A TFRC PTPRB SLC6A6 MAP3K13 PTPRE CCNC PLAGL2 IGF2R SLC6A8 CDKN2B GNA13 PPP2R5B TRIM21 UBE2H E2F6 MTF1 ZNF37A TFEC KCNH2 CA2 IMPA1	NO
BROWNE_HCMV_INFECTION_24HR_DN	0.275229	0.678964	0.0886261	0.300845	1.09842	111	IGFBP3 COL13A1 LPAR1 B2M LGALS3 RIN2 BNIP3L SEMA3C PRSS23 IFITM1 KCNMA1 FBN2 GAS6 BACH1 PTPRM MTMR11 BST1 CXCR2 SLC14A1 CD59 MGST3 RDH5 PTEN SEMA5A CTSO KIAA0930 TAF1B CFLAR	NO
BROWNE_HCMV_INFECTION_24HR_UP	0.113043	0.440198	0.282013	-0.286147	-1.2148	119	WNT11 RRM2 E2F5 TNFRSF17 RAB33A SNRPA1 MAP3K9 TMEM265 TBXA2R ABLIM1 NELFA PDIA4 ADARB1 ADGRL1 RASGRP1 ZHX2 MCM7 CD83 TSPAN9 APEX2 KMT2B F2RL1 FKBP4 TAF5L PPM1G SLC29A1 CTDP1 EPHB2 CXADR	NO
BROWNE_HCMV_INFECTION_2HR_DN	0.235988	0.636594	0.155242	-0.343803	-1.16672	34	BIRC5 UBE2C SERPINE1 CENPF ABCC1 MYC YLPM1 TTC9 ITGA3	NO
BROWNE_HCMV_INFECTION_2HR_UP	0.192616	0.572892	0.123842	0.450518	1.23702	24	ATF3 PTGDS IGF2 RGS2 ICAM1 ELANE FOS CFD NFKBIA FYB1 MAP3K8 VWA5A ERP44 N4BP2L1	YES
BROWNE_HCMV_INFECTION_30MIN_DN	0.74574	0.972398	0.0397596	0.237171	0.859518	98	NTSR1 RHCE BCAS1 BRCA2 PTP4A1 KLRK1 AXL EPB42 EEF1A1 TAF13 IFNG ATG5 AURKA RANBP6 CASP6 SOCS1 SIRPA TNFRSF1B TNFSF11 NCAPH SUCO RUBCN VWA5A GZMK CDC42 GSAP RSRP1 GLB1L2 OPHN1 RCC1 DST XCL2 GLMN CENPE LAPTM5	NO
BROWNE_HCMV_INFECTION_30MIN_UP	0.66967	0.94105	0.0852885	-0.26384	-0.881729	32	APOM APBA2 CD38 IFI27 PTK7 PLXDC1 BICDL1 NPIPB3	NO
BROWNE_HCMV_INFECTION_48HR_DN	0.414905	0.797478	0.0592219	0.251308	1.02474	333	FGF13 HBB RPL23 KRT5 MAP1B IGFBP3 ACHE CEP170B PRUNE2 SGCD LGALS3BP DTNA C3AR1 PEMT CFH FPR2 MYBPC3 NDUFA6 SERPINB10 SOCS3 LIMK2 DDIT3 SPTB IFITM2 FOXO3 SLC7A7 STAT1 PTP4A1 FOLR2 EPAS1 TSPAN6 CAMP C1orf21 PRRG2 MTMR11 ASPH RHOQ FAM214B PLAUR FKBP9 CXCR2 DUSP1 PLXNC1 EPB42 RNASE4 MAPK14 RNF19B RAB2A RAP2A FKBP8 SH2D1A IFNG ATG5 ZYX RNF10 VRK2 MICAL2 CTBS EIF2AK1 TSPAN31 NEK7 ZFP36 SPP1 WIPI1 IGF2R…	NO
BROWNE_HCMV_INFECTION_48HR_UP	0.0870113	0.386134	0.168238	0.33312	1.25199	142	SLPI GEM HAT1 ANXA3 POLE2 PDE8B SNAPC1 ATF3 ZNF365 LILRB4 GADD45B IFI30 RFC4 SAP30 CKS2 SNCA MNDA LMO2 CALCRL NFIA GGCT SLC6A12 POLR3F AJAP1 IL18R1 CD55 IER3 ATP6V1B2 HMGN3 TMOD1 MAGOH AMD1 CDC7 USP1 TMEM106C ZNF20 ATG12 BRCA1 PPT1 RAB29 SNX4 FAM13A AKAP10 PTGER3 EEF1E1 POLR2H	NO
BROWNE_HCMV_INFECTION_4HR_DN	0.465416	0.832407	0.0562941	0.254906	1.00303	201	NEBL NTSR1 FOXC1 CACNA1E SLC1A7 HMGB2 ADM C3AR1 SERPINI2 KLF10 GEMIN2 RIN1 LIMK2 DDIT3 SERPINA1 PTP4A1 STARD13 POLB SNUPN DUSP1 HTR7P1 ZNF268 CDK5 CHRNB1 ATG5 AURKA JRKL RANBP6 MICAL2 ZFP36 SOCS1 MED7 SUPT20H NCAPH KLF6 CXCR6 ZNF23 UTY LYST GZMK MNAT1 CSF1R EMG1 GADD45A HIC1 PIAS3 MICU1 GLB1L2 PPP2CA KLHL9	NO
BROWNE_HCMV_INFECTION_4HR_UP	0.363229	0.762129	0.0806388	0.367267	1.08781	32	ISG15 RSAD2 IFIT1 LCN2 PMAIP1 PTGS2 TFRC FKBP5 RLF RIPK1 TFEC PTGER3 RSRP1	NO
BROWNE_HCMV_INFECTION_6HR_DN	1	1	0.0236501	0.16417	0.615474	137	GAS1 TCF7L2 ITGAE TBC1D8 RIN1 SRGAP2 CREB5 SLC22A4 DUSP6 BACH1 THBD ZNF230 FBXL5 AJAP1 TXNIP EPB41 TBC1D31 CASP6 CFLAR FPGT ELF2 GSAP NAP1L3 PEX11B GLB1L2 AGGF1 NCK1 MDM2 ZNF44 PARP4 NORAD TJP2 ACOX1 ZNF24 RO60 ID2 CDC40 TSPYL5 TDRD3 TLE4 MDM1 DOP1A RPP14 RGS19 GTF2H2 MED21 STON1 COIL FRY NR3C1 SMAD5	NO
BROWNE_HCMV_INFECTION_6HR_UP	0.450147	0.823831	0.0686326	0.324209	1.00762	41	ISG15 AFF2 PTGDS MNDA GNS FRMD4B SLC6A6 IGF2R SLC6A8 AMD1 EZH2 HLF RIPK1	NO
BROWNE_HCMV_INFECTION_8HR_DN	0.445087	0.820863	0.10714	-0.286617	-1.00157	36	KIF2C GINS1 AHDC1 PLAU MYC	NO
BROWNE_HCMV_INFECTION_8HR_UP	0.0402778	0.277841	0.266351	0.402214	1.40189	75	TNFAIP6 SPOCK1 ISG20 PLA2G4A CXCL10 RBM38 LYZ GK DNAJA1 GALNT3 GNS PCDHGA12 ICAM1 TNFSF10 RAB5A RAP2A TFRC ELANE FOS AMD1 GNA13 TGFBR1	NO
BROWNE_INTERFERON_RESPONSIVE_GENES	3.27844e-05	0.00178004	0.557332	0.578152	1.97276	65	CCL8 ISG15 RSAD2 PLSCR1 STX11 ISG20 IL15 UBE2L6 NMI TREX1 CXCL10 IFI44L IFI30 CASP1 TLR3 STAT1 IFIT5 PSMB9 LMO2 BST2 MYD88 TAP1 TNFSF10 SP110 THEMIS2 GBP2 RGL1 BAZ1A IL15RA PSMB8 TRIM21 SP100 GMPR HLA-F	NO
BROWN_MYELOID_CELL_DEVELOPMENT_DN	0.619921	0.916167	0.048215	0.253768	0.925072	106	RPL23 FAM20A NT5C3A AQP9 MBOAT2 F2R SLC1A5 TMTC2 ERH NT5C3B RGS5 CLEC10A ODC1 GNAL CD48 NPL CSGALNACT2 PGRMC1 TNFSF11 PARP8 CDK4 NOP58 SLC7A5 TMEM97 NRIP1 FCER1A SYTL3 TRIM37 SOD1 FUT7 PSAT1 IFITM3 SSR3 RCL1	NO
BROWN_MYELOID_CELL_DEVELOPMENT_UP	2.76036e-11	7.97546e-09	0.863415	0.591281	2.22221	141	C3 MMP8 BCL2A1 IL4I1 IL1RN RPS17 OLR1 IL1B CSTA MCEMP1 SAT1 LILRB4 LCN2 ACKR1 FPR2 FCGR1A GLRX STOM LILRA5 FCGR2A CCR1 FPR1 C5AR1 ANXA5 IL1R2 S100A6 CYBB TLR2 CAMP SCARB2 GYG1 CLEC5A FGR NQO1 MXD1 GNS LILRA6 HCK PSTPIP2 PLAUR S100A11 CD52 CTSS HEBP1 TYROBP MSRB1 NFAM1 JUNB PLGRKT CLEC6A RNASE4 TNF SLFN12 CD33 GRINA GRN ATP6V1B2 PYGL SLC15A3 DGAT2 AOAH CSF2RA FHAD1 SLC6A6 ITGAX ZYX CCR2 GLIPR2 IQG…	NO
BRUECKNER_TARGETS_OF_MIRLET7A3_DN	0.344778	0.748899	0.0810802	0.329517	1.09336	58	BCL2A1 SPOCK1 ANXA3 RIN2 LGALS3BP PLK2 PRSS23 RNF149 CXCL1 CTSL GSDME MT1X CXCL5 DCBLD1 LACTB ADGRE3 BZW1 GALNT1	NO
BRUECKNER_TARGETS_OF_MIRLET7A3_UP	0.0224308	0.20551	0.352488	0.429179	1.52407	84	FOXC1 CYSTM1 LRP11 SAT1 ERRFI1 VCAN FAT1 GLRX PLA2G4A B4GALT5 CYP1B1 ARHGAP26 TFPI POLB ATP1B3 CPEB4 CLDND2 SEC11C COX7C KLF4 OSGIN2 CD55 THSD7A PTPN12 EFNA1 TBC1D31 TESC USP32 TXNRD1 BTG1 LYST NFE2L2 SAMD8 TBC1D15 RAB3D	NO
BRUINS_UVC_RESPONSE_EARLY_LATE	0.751147	0.975406	0.0331626	0.220557	0.884664	256	PRDM5 RPS17 FAM228A ANXA3 EIF1AY FRMD4A CCNE2 PSMC6 TREX1 SOCS3 TRAPPC2B WDSUB1 LSM1 RBM38 CDYL STIL SNX10 LRR1 HNRNPLL ZFAND1 ATG3 SLIT1 P2RY12 MITD1 APLF GAS8 MICOS13 QKI LRP1 GPCPD1 DUSP12 PRICKLE2 SORBS1 C12orf29 PTPN12 SSB MAP1A SPTLC2 IFRD1 TXNDC16 ASAP1	NO
BRUINS_UVC_RESPONSE_MIDDLE	0.817814	0.99833	0.036839	0.225355	0.797225	83	ATP23 TTC23 ARL17B ISG20 LIMK2 DDIT3 SAP30 CMTM6 ICAM1 CASP6 ARMC10 ELOVL5 SEC24D RBM43 L3HYPDH CAMLG	NO
BRUINS_UVC_RESPONSE_VIA_TP53_GROUP_B	0.0523504	0.309813	0.202072	0.299879	1.24024	401	CCL8 FAM20A SEMA3D COL17A1 MMP14 ARG2 CYP46A1 OLR1 SGCD ANXA3 SDCBP2 MS4A4A SAT1 NRXN1 GNG11 GASK1B LCN2 ANXA1 ACKR1 KLHDC8A NECTIN3 DYNLT3 SEMA4A CCNA1 FBXO6 NMI RIN1 RNASE2 PRSS23 TRAPPC2B PDGFRA RGS18 WDR31 FAS C5AR1 SCN1B RAB23 UBXN6 SLC35A1 CENPN MARVELD2 S100A6 NABP1 ASAH1 PMAIP1 CCRL2 PGLYRP1 GZMB MYD88 TAP2 DUSP6 GBA NQO1 LOXL3 GGCT CMTM6 TNFRSF12A THBD ECHDC3 C1GALT1C1 LRP1 B4GAT1 HEXIM2…	YES
BRUINS_UVC_RESPONSE_VIA_TP53_GROUP_C	0.0472562	0.297089	0.321776	0.443992	1.4681	57	GEM TLR5 ERG P2RY14 FAM210B KLF10 ADGRV1 SOCS3 LYZ SGSM1 SMIM20 SDC4 GNG5 TMC5 CCNK NAGA HMGN3	NO
BRUINS_UVC_RESPONSE_VIA_TP53_GROUP_D	0.644336	0.92927	0.0431037	0.237954	0.922703	185	BCL2A1 SH3BGR PRUNE2 SEMA3A HEMGN SNAPC1 LGALS3 ADM FAM151B RHCE FLACC1 GADD45B FPR3 SERPINA1 KCNMA1 PPP1CB PDCD1LG2 TRIP10 SOCS6 CALCRL TMEM176A DUSP23 TGFBR3 CD48 SPOPL FHAD1 INAFM1 BLOC1S1 RNF138 BID CFLAR ATP1B2 TNFSF13B LAT2 ZBTB22 VPS50 CACUL1 USP32 FCGR2B MZT1 SLC30A1 TIPRL RARA	NO
BRUNO_HEMATOPOIESIS	0.288984	0.693664	0.0908241	0.339843	1.12763	58	CRISP3 AQP9 LILRA5 VAMP5 MNDA S100A6 AK1 GZMB PTGS2 CD55 HK2 IGFBP7 LAT2 MSMO1 GALK1 CTSC AK4 CD9 HMGCR ADGRE1 ELOVL6 ZNF106 SLC39A6 SESN1 GLB1 RNF19A ELF1 FKBP1A PRDX4	NO
BUCKANOVICH_T_LYMPHOCYTE_HOMING_ON_TUMOR_DN	0.385382	0.775172	0.0831291	0.409457	1.05076	17	MEG3 ACTR6 MYBL1 SEC61G ATP9A NCOA1	NO
BUCKANOVICH_T_LYMPHOCYTE_HOMING_ON_TUMOR_UP	0.486043	0.842891	0.0704501	0.375853	0.975801	18	C3 STK3 CYP1B1 CFLAR AKAP10 SERPINB6 GRK3	NO
BURTON_ADIPOGENESIS_1	0.333333	0.738004	0.0873098	0.391396	1.1106	27	NFIL3 ERRFI1 PHLDA1 DNAJB4 CEBPB THBD ETS2 LITAF IER3 CEBPD	NO
BURTON_ADIPOGENESIS_10	0.215385	0.605102	0.113313	0.424052	1.21732	28	LPL ZFAND6 GYG1 FLOT1 CAVIN2 UBA3 ATP6V1C1 CPEB2 MSMO1 PKP2 HMGCS1	NO
BURTON_ADIPOGENESIS_11	0.019003	0.1884	0.352488	0.485855	1.55025	46	LPAR1 GAS1 MARCKS IDI1 TBK1 DDIT3 RNF13 RAB9A CCDC88A ACVR2A ZNF644 GBP3 PKD2 PNRC2 GADD45A ALCAM SMS SNAPIN ATP6AP2 ARHGAP5 IRF1 NFIX ZSCAN26 ARFGEF1 KIF5B PAXBP1 ZMYM6 AKTIP NR3C1	NO
BURTON_ADIPOGENESIS_12	0.504532	0.850897	0.0645031	0.334085	0.967283	29	EMC2 CYP1B1 DNAJC3 CIP2A SP3 UBE2V2 CASP8AP2 PTBP3 RSRP1 DIPK2A TMEM68 FAM76B NIPBL SRSF10 ARGLU1 IREB2 KIF2A BOD1L1 CAPN7	NO
BURTON_ADIPOGENESIS_2	0.933048	1	0.0331626	0.206927	0.683185	56	IL1R1 RHOU SRR PRDX6 BCAT1 TGFBR3 MAP3K6 SASH1 SERP1 FKBP5 SLC6A6 SRXN1 GSTO1 SPHK1 AVPI1 MCL1	NO
BURTON_ADIPOGENESIS_3	0.0205794	0.195179	0.352488	-0.337657	-1.38715	92	CDC20 KIF2C BIRC5 RRM2 PLK1 CCNB2 CDC45 CCNF BUB1 RAD51 CDC6 INCENP MCM2 CENPK KIF20A MKI67 MCM10 KIF11 KIF4A MCM4 MCM7 CDCA8 KIF22 SMC2	NO
BURTON_ADIPOGENESIS_4	0.969743	1	0.0341946	0.200609	0.60985	37	LSM3 RHOU GLUL ST3GAL4 BCL6 ATP6V1F ZNF385A POLE4	NO
BURTON_ADIPOGENESIS_5	0.0446194	0.290403	0.245042	0.37392	1.36346	107	C3 DBI TIMM9 ACSL1 UQCRH IGF2 CBR3 GK SLC1A5 IFNGR1 TIMM17A ADAM12 MGST3 SORBS1 COX6A1 PPIF NDUFAB1 HK2 MPC2 PPA1 MAPK6 ACADM MRPL18 TIMM23 ISCA2 ABHD5 CHP1 PRDX3 PIM3 TALDO1 GUCD1 PSMA1 PRELID3B TMEM97 NDUFB10 NRIP1	NO
BURTON_ADIPOGENESIS_6	0.000830889	0.0229416	0.477271	0.419338	1.59854	160	S100A8 RETN NDUFB3 LPL COX7A2 UQCRB SGCD ORM1 NDUFA5 ARL4A HP ISCA1 LCN2 MGST1 GCSH CA3 UQCRQ RNF11 COX7B G0S2 C9orf72 KAT2B NABP1 CAMP ME1 ABCA1 CHPT1 TANK FAM126B	NO
BURTON_ADIPOGENESIS_7	0.387283	0.776101	0.116234	-0.301136	-1.05231	36	SYNPO DNM1 CCND1 FBLN2 FBN1	NO
BURTON_ADIPOGENESIS_8	0.137834	0.486084	0.138805	0.373463	1.25924	62	GNG10 ANXA3 TCEAL9 PRSS23 F2R RAB31 ANXA5 ASAH1 TSPAN6 GBA TUBA1A PLA2G7 PSAP PLXNB2 MAP1LC3B ITGAV NSA2 LAMP2 ACTA2 DSTN FAM91A1 LEPROT HMGCR CPQ SLC7A5 SERPINB6 CAP1	NO
BURTON_ADIPOGENESIS_9	0.0111168	0.135444	0.38073	0.463249	1.57274	64	GEM SLC8A1 MAOA PHLDA1 PLK2 CNN3 PLA2G4A CLIC1 MFSD1 GLMP RNF13 HEBP1 SNX6 KLF4 LATS2 PTGS2 GRN STXBP3 FOS CEBPD TXNDC16 ASAP1 SPP1 ACVR2A CDKN2B PCGF5	NO
BURTON_ADIPOGENESIS_PEAK_AT_0HR	0.271386	0.676018	0.0962406	0.360787	1.14054	45	LPL GAS1 ISG15 MARCKS PDGFRA DDIT3 FLOT1 ASAP1 SPP1 PLIN2 MYL9 CALML4 SERF2 ACTA2 IDH1 GADD45A PSMB10 TPM1 APBB1IP SFRP2	NO
BURTON_ADIPOGENESIS_PEAK_AT_16HR	0.590015	0.901365	0.0571259	0.303286	0.921989	37	HMGB2 HAT1 VCAN RNASE2 MNDA	NO
BURTON_ADIPOGENESIS_PEAK_AT_24HR	0.463415	0.831127	0.0691198	0.333781	1.0087	36	S100A8 SLPI NUSAP1 LCN2 AQP1	NO
BURTON_ADIPOGENESIS_PEAK_AT_2HR	0.080597	0.373359	0.191892	0.447224	1.36693	38	TNFAIP6 ADM ERRFI1 PHLDA1 SEMA3C DNAJB4 RGS2 ETS2 DUSP1 JUNB KLF4 PTGS2 IER3 HK2 FOS CEBPD ZFP36 SLC20A1 TNFRSF1B	NO
BURTON_ADIPOGENESIS_PEAK_AT_8HR	0.799094	0.994258	0.0431037	0.257405	0.775769	35	MNDA FGL2 CEBPB PRDX6 KLF5 TSC22D3 SRXN1 PPA1 GSTO1 BZW1 TOP1 VDR RCL1 SAMHD1 PLAC8 IL1RL1	NO
BYSTROEM_CORRELATED_WITH_IL5_DN	0.404591	0.788709	0.0728939	0.315992	1.04486	57	CYBB ZNF22 MXD1 KLRK1 PSTPIP2 RNF13 ADAR SLFN12 SNX2 TFDP1 SLA SORL1 PLD1 LYST RAB10 NCF1 ADAM10 ITGAL PTPRJ CLK4 RNF2 MATR3 SSR3 TRAM1 PAPOLA NR3C1 AP1G1 SF3B1 KPNA3 PIM1 HIPK1 FOXM1	NO
BYSTROEM_CORRELATED_WITH_IL5_UP	0.540785	0.872923	0.0611693	0.315504	0.950867	35	TACSTD2 RNASE2 CAMP VAMP8 CTSH STX3 CD63 HDGF GATA1	NO
BYSTRYKH_HEMATOPOIESIS_STEM_CELL_AND_BRAIN_QTL_CIS	0.0577465	0.324423	0.222056	0.404277	1.35493	60	SCOC SRP9 MNDA EEF1AKMT1 DCTN6 SNRPB2 ARL6IP1 PADI2 AGTRAP MRPS7 IQGAP1 ZFAND5 MRPL44 GFER SC5D CTSC THUMPD1 GLO1 NOP10 SKP1 SPG21 DAP3 ARHGAP9 CUX1 MRPL35 KMT2E PSMB6 ACAA1	NO
BYSTRYKH_HEMATOPOIESIS_STEM_CELL_AND_BRAIN_QTL_TRANS	0.645455	0.929298	0.112379	-0.215655	-0.935711	132	SDC1 GLDC LAMB3 MMP17 PSD UPK3B ZNF444 NME3 IGFBP4 SEMA4F MAP1S MKI67 PCK2 PDLIM1	NO
BYSTRYKH_HEMATOPOIESIS_STEM_CELL_QTL_CIS	0.00147557	0.0343029	0.45506	0.441793	1.62216	117	DBI ITLN1 F5 CTSE SCOC CNN3 F2R CREG1 SRP9 MNDA NABP1 NUB1 TFPI GNB4 DCTN6 SNRPB2 CD1D CD59 FLOT1 LITAF ARL6IP1 PADI2 ATP6V1B2 AGTRAP MRPS7 CCR2 MPC2 NPL DIAPH3 SPAST GFER TMCO1 ST6GALNAC4 CST3 SERF2 SC5D CTSC SQOR ADPGK PADI4 THUMPD1 GLO1 F11R NOP10 PIGX	NO
BYSTRYKH_HEMATOPOIESIS_STEM_CELL_SCP2_QTL_TRANS	0.563131	0.885468	0.0852885	-0.329784	-0.913945	15	CTSG	NO
CADWELL_ATG16L1_TARGETS_DN	0.065312	0.341845	0.2114	0.433299	1.39186	47	SATB2 STOX2 PDK4 PPARGC1A SLC22A15 RGS5 SMIM10L1 FKBP5	NO
CADWELL_ATG16L1_TARGETS_UP	0.0180003	0.182713	0.352488	0.486162	1.58012	50	LPL HBA1 ISG15 RSAD2 HP IFIT1B CA3 SOCS3 LHFPL2 CD36 SUCNR1 GZMB BST1 FAM241A WDFY1 BLOC1S6 DGAT2 CD163 FAM3B CFD VNN1 ARSK	NO
CAFFAREL_RESPONSE_TO_THC_24HR_5_DN	0.603774	0.910613	0.0541201	0.284262	0.917669	48	NDUFB3 NEAT1 NUSAP1 NDUFA1 SUB1 TUBA1A RAB2A DCTN4 EBP YY1AP1 CDC42 IMPA1 ARF4 EIF5 SLC3A2 MLC1 ATP5MF	NO
CAFFAREL_RESPONSE_TO_THC_24HR_5_UP	0.00366437	0.0654409	0.431708	0.602086	1.74323	29	RBX1 NAMPT PSMA2 ABRACL CKS2 EIF2A ZFP36L1 CTSL MYL6B RAB5A CNBP TFRC RNF10 NCOA4 LIG4	NO
CAFFAREL_RESPONSE_TO_THC_DN	0.248521	0.652982	0.151149	-0.338453	-1.12186	30	RRM2 ZWINT UHRF1 CCNA2 DHCR7 PCLAF HSPA2 CDK1 GIPC1 MCM3 PABPC4 SERPINB2	NO
CAFFAREL_RESPONSE_TO_THC_UP	0.412651	0.795412	0.0743625	0.358199	1.04874	31	NEAT1 CPEB4 ZFP36L1 RAB5A TFRC SERINC1 YY1AP1 IMPA1 KCMF1 SLC3A2 FNTA HERPUD1 USP3 ZRANB2 CENPL NUCB2	NO
CAIRO_HEPATOBLASTOMA_CLASSES_DN	0.767327	0.981898	0.10673	-0.20081	-0.895283	150	SYNPO KANK3 BLNK NBL1 SHB MAN1C1 LIMS2 RAB33A SERPING1 CD81 HSD17B6 SPTBN1 KHK ZNF710-AS1 ENG ZNF862 HTRA1 BSCL2 JADE2 FMO4 SNED1 TTC9 ABCA2 SMAD7 CYP2E1 EGR1 PLA2G4C SPON1 HDAC9 LDB2 ATP10A DBP MAP3K14 BLCAP ZCCHC24 TRAK1 IL2RB LCK	NO
CAIRO_HEPATOBLASTOMA_DN	0.031746	0.251776	0.282013	0.357148	1.36929	165	INHBB SLPI RIDA NRG1 IGFBP3 DNASE1L3 HP PPARGC1A ADM NFIL3 PEMT STAB1 CRHBP ACSL1 KCND3 ALPL LEPR NAMPT HGD C1R CD14 SLC22A1 NQO2 HAGH TFR2 CPEB3 IL1RAP BMERB1 OSBPL1A ETS2 CHST7 ST3GAL6 STARD5 MPC1 UGP2 CDC37L1 ACAA2 ABHD2 LYVE1 ZFAND5 SLC20A1 SORL1 ACADM HPGD RAB27A KLF6 INSIG1 FCGR2B MCL1 VNN1 SLC43A3 MFAP3L SLC27A5 MAP3K5 MAP2K3 GSTZ1 EXT1 CFP CA2 PDLIM5 SDHB	NO
CAIRO_HEPATOBLASTOMA_UP	0.946602	1	0.0242859	0.193121	0.748023	181	PEG3 MEG3 BCAM ARL4A MARCKS AKR1C3 ITGAE LRRC1 IGF2BP2 LYZ FKBP1B CLIC1 PALLD GLUL MPZL1 PLXNC1 UBAP2 CYP51A1 ACSS3 RNF43 RAP2A	NO
CAIRO_LIVER_DEVELOPMENT_DN	0.000913356	0.0242264	0.477271	0.432176	1.62662	145	S100A8 RIDA C3 IL1RN S100A9 OLFM4 NRN1 ASGR2 HP ISG20 AQP9 LCN2 C1QA ANXA1 CES1 ACSL1 AQP1 F12 ARG1 LYZ SLC7A7 SERPINA1 NABP1 CYBB ABCC6 JAK2 CAMP PGLYRP1 GM2A CDH1 LTF HAGH TFR2 ITIH1 SERPINF2 C5 LRP1 CD302 SELENBP1 RDH5 CTSH SMPDL3A PYGL ELANE PSAP CCR2 ACAA2 PKN2	NO
CAIRO_LIVER_DEVELOPMENT_UP	0.344241	0.74843	0.0764767	0.289258	1.06088	114	SEMA3D PFDN4 COLEC12 GAS1 SEMA3A TMEFF1 PDGFC SMARCD3 PLK2 RWDD1 FKBP3 PDGFRA IGF2BP2 PLS3 BASP1 TSPAN6 RCN2 SOCS6	NO
CAIRO_PML_TARGETS_BOUND_BY_MYC_UP	0.666667	0.940424	0.0774768	-0.299359	-0.872952	19	CDC25A DNPH1 CAD	NO
CAMPS_COLON_CANCER_COPY_NUMBER_DN	0.524169	0.863652	0.0626618	0.319953	0.964276	35	SLC2A14 NRXN3 APOBEC3A CES1 FCGR1A APOBEC3B RHD	NO
CAMPS_COLON_CANCER_COPY_NUMBER_UP	0.00391336	0.0675694	0.407018	-0.458162	-1.71637	52	DIRAS1 LCN10 C1orf220 GPSM1 DOK6 PRKN C4orf36 MPRIP PYCR1 SHMT1 PCYT2 DNASE1 LLGL1 BOP1 MAFK PANK4 MSI2 TRAF7 KAZN UPF1 MIEF2	NO
CARD_MIR302A_TARGETS	0.255977	0.660956	0.0968878	0.340899	1.14944	62	RORB MAP1B JAZF1 TSHZ3 DLL1 JUNB RB1CC1 SASH1 CDC37L1 ASAP1 ZDHHC9 TNFSF11 ARID4B ARID4A ZNF385A HLF	NO
CASORELLI_ACUTE_PROMYELOCYTIC_LEUKEMIA_UP	0.00157778	0.0357542	0.45506	0.415556	1.57136	150	FGF13 TOMM7 EVI2A TCF7L2 ARL4A MXRA7 NFIL3 STAB1 GLRX WDFY3 KLF10 AFF2 CCNA1 PTGDS ATP6V1G1 CD3D AP1S2 RNF11 SAP30 S100P TLR2 RGS2 HCAR3 TANK AZI2 AGTPBP1 ZNF91 HGF NDUFS4 DUSP1 MGST3 ADGRE2 FNDC3B GLIPR1 CD33 DMXL2 TSC22D3 PTPRE DENND5A FOS ZFAND5 CEBPD MAP1LC3B ZFP36 CSGALNACT2 IGFBP7 SORL1 CFD NFKBIA SLC31A2 RBMS1 PLCB1 CTSW PLAGL1 KLF6	YES
CASORELLI_APL_SECONDARY_VS_DE_NOVO_UP	0.234328	0.633595	0.10592	0.38507	1.17696	38	HP GCA ANXA5 FBN2 EVI2B KLF4 SLFN12 SLC36A1 DPM3 ENTPD1 FOS OTULINL MCTP2	NO
CASTELLANO_NRAS_TARGETS_UP	0.111433	0.437617	0.158514	0.397182	1.29434	51	IL1RN ISG15 PLSCR1 B2M LCN2 IFIT1B ZNF32 CLEC11A STAT1 MNDA AK1 NQO1 IFI27L2 TAP1 IL13RA1 KCTD12 GBP2	NO
CAVARD_LIVER_CANCER_MALIGNANT_VS_BENIGN	0.0879479	0.388377	0.191892	0.525136	1.38836	20	AKR1C1 MYL6 CES1 CD14 GLUL FTH1 SPP1 DPYD	NO
CEBALLOS_TARGETS_OF_TP53_AND_MYC_DN	0.0365646	0.269077	0.321776	0.512159	1.48287	29	IGFBP3 TCN2 NPRL3 SLC4A1 F2R SNCA PLAUR KIF14	NO
CEBALLOS_TARGETS_OF_TP53_AND_MYC_UP	0.495935	0.848371	0.0689567	0.374787	0.986453	19	HSPE1 ACSL1 MTHFD2 NEK3 JUNB CD55 ACSL3 INSIG1	NO
CERIBELLI_GENES_INACTIVE_AND_BOUND_BY_NFY	0.520833	0.860769	0.0658312	0.355398	0.958292	22	S100B CBR3 RBM38 GAS2L1 SYNJ1	NO
CERVERA_SDHB_TARGETS_1_DN	0.623737	0.91863	0.0797706	-0.320393	-0.887919	15	PEG10 TMC8 CCR6 SH3RF3 PPFIBP2	NO
CERVERA_SDHB_TARGETS_1_UP	0.325967	0.730748	0.0822055	0.313709	1.08826	71	MAP1B MYOF TNNT1 RBP7 AQP1 PRSS23 HPSE PLXDC2 MINDY4 EPS8L1 S100A6 PLBD1 PMAIP1 SUCNR1 TMEM40 BMERB1 TUBA1A NOD2 LIPH IL18 EDN1 GOLM1 RIPOR3 SH3BGRL TNNI2	NO
CERVERA_SDHB_TARGETS_2	0.0906593	0.393896	0.172324	0.380572	1.30358	66	PEG3 NUAK1 MAP3K20 CCNE2 F5 SIPA1L2 MELTF LEPR NMI PRSS23 PFKFB3 FBN2 GALNT3 CREB5 P3H2 IL1RAP SERPINI1 DUSP1 CTSH GSDME MICAL2 CLTB CXCL5 IGFBP7 SH3BGRL	NO
CHANDRAN_METASTASIS_DN	0.29036	0.69518	0.0791317	0.274655	1.08905	223	FGF13 PGM5 RORB KRT5 COL13A1 SWT1 LPAR1 BBOF1 B2M ATF3 MAP3K20 PDGFC HECW2-AS1 TSHZ3 SEMA3C BCAS1 ROGDI PODN RAB23 FBXO2 FGL2 VMP1 STARD13 TSPAN2 NFIA IDNK LRMDA NEXN DUSP1 RASSF4 KLF4 PRICKLE2 SORBS1 PTGS2 RNF43 FBXO22 CTSO RNF10 RILPL2 FOS FAM3B MCTP2 ZFP36 GOLM1 AMD1 MRPL45 MED11 TIGD2 CRISPLD2 PYCARD SRRD DDR2 KLF6 ARHGAP27 PPM1L ME3 TEN1 GTDC1	NO
CHANDRAN_METASTASIS_TOP50_DN	1	1	0.0317091	0.119519	0.367921	39	ROGDI FOS EFHD2 AGGF1 MALAT1 TM9SF3 ARL5A TOMM20 CHMP4B IER2 B3GALNT1 NT5DC1	NO
CHANDRAN_METASTASIS_TOP50_UP	0.797888	0.993829	0.0431037	0.263156	0.787607	34	BASP1 GRINA JPT1 AK4 HSP90AA1 SOD1 IBTK AR KMT2E NUFIP2 IRF2BP2 EIF1AX ZNF587 PCBP2 GRB2 RALA	NO
CHANDRAN_METASTASIS_UP	0.264885	0.6692	0.08654	0.283272	1.09524	179	S100A8 HBB NEAT1 HBA1 VCAN CNTLN HSPE1 LSP1P4 PRLR BASP1 NUB1 KCNJ15 LYN CPEB4 ZFP36L1 DNAJC3 FGFR1OP2 AIG1 HSPA6 UBE2D3 CDKN2D WDFY1 FBXO45 NBPF14 LSMEM1 RIPK2 EPB41 RAB12 SPP1 AGO4 ZFYVE16 OSBP2 LINC00205 ABHD5 JPT1 TIPRL AK4 TAF1D ADAM10 PDLIM5 SLC7A5 EIF5 SPG11 MALAT1 PDP1 ZNF281 MAGOHB AGO2 NORAD HES6 KANSL1 SEL1L E2F3 IBTK DUSP8 ZNF148 PPP2R5C TMSB10 DDIT4 TRIM3 AR TAOK1	NO
CHANGOLKAR_H2AFY_TARGETS_DN	0.194277	0.574243	0.118815	0.422783	1.23784	31	YBX3 PTGDS TBCEL CMKLR1 SUCNR1 VAMP7 C7orf25 MSL1 VCPIP1 P2RY1 NEK4 MFN1 CD109 AR	NO
CHANGOLKAR_H2AFY_TARGETS_UP	0.199708	0.582191	0.114751	0.388417	1.21229	42	LPL CA1 RHOU TMEM176A ZC3H12C RICTOR PTGFRN SLC6A8 ITPK1 FNIP1 SMAP2 MCL1 TENT2 GLO1 SLC25A39 TMEM70 ENPP3	NO
CHANG_IMMORTALIZED_BY_HPV31_DN	0.0173474	0.178323	0.352488	0.492403	1.55196	44	HBB SLPI IL1RN DSC2 BPGM IFIT1 SAMD9 LCN2 IFITM1 STAT1 IL1R2 MXD1 LRP1	NO
CHANG_IMMORTALIZED_BY_HPV31_UP	0.223329	0.616739	0.10592	0.359122	1.18049	52	SLC18A1 S100A12 MS4A4A MS4A6A CLDN12 G0S2 CTSH DLEU2 MAP9 ASAP1 ACVR2A ACER3 GPR108 TTC38 LGALS1 ARID4A APC USP31	NO
CHARAFE_BREAST_CANCER_BASAL_VS_MESENCHYMAL_DN	0.0377074	0.272654	0.287857	0.482797	1.44497	34	MAP1B NUAK1 SEMA3A GNG11 RNF182 STRADB	NO
CHARAFE_BREAST_CANCER_BASAL_VS_MESENCHYMAL_UP	0.0199683	0.191857	0.352488	0.448394	1.56317	74	S100A8 RTKN SLPI KRT5 BSPRY MBNL3 LCN2 ACSL1 TACSTD2 LIMK2 PRRG4 S100P MARVELD2 CDH1 EPB41L4A DRAM2 RNF144B LITAF RNF43 TSC22D3	NO
CHARAFE_BREAST_CANCER_LUMINAL_VS_BASAL_DN	0.00210058	0.0441395	0.431708	0.346865	1.42065	350	SLPI MMP14 KRT5 C3 GAS1 IL20RB NRP1 ANXA3 PI3 AKR1C1 RBFOX2 PLSCR1 B2M ARHGEF28 RIOK3 ADM SAMD9 ANXA1 IL15 PDGFC YBX3 AKR1C3 TCEAL9 CCNA1 NMI SLC1A3 PLA2G4A NAMPT CASP1 YBX1 SLC25A37 IGF2BP2 PLS3 FAS WWTR1 PSMB9 MIR22HG NABP1 GTF2B DNAJB4 TLR2 RGS2 TRIP10 C1R CD14 LYN IFNGR1 TAP2 GM2A IFI16 ATP1B3 P3H2 CDC42EP3 ITPRID2 RALB PPP4R1 PTPRM SPX IGF2BP3 ZC3H12C IL1RAP AXL ICAM1 CCDC82 MPZL1 DOCK5 B3GN…	NO
CHARAFE_BREAST_CANCER_LUMINAL_VS_BASAL_UP	0.00556026	0.0859711	0.407018	-0.273494	-1.30658	297	CACNB3 UAP1L1 C14orf132 CREB3L4 CHDH GAMT LONRF2 BLNK TJP3 ATP6V0E2 ASTN2 DEPTOR HIP1R WFS1 ELL3 CCND1 AFF3 DEGS2 RAB11FIP3 ATP2C2 SOX12 PLXNA3 ZNF444 NME3 ESR1 DIP2C CACFD1 STRBP FBRSL1 PRRT3 ABCA3 CXXC5 VIPR1 KLHL22 PCK2 PYCR1 SLC24A3 SIDT1 RHPN1 ZBTB42 SOGA1 EVL ABHD12 TBC1D16 KIFC2 LARGE1 SNED1 SLC25A29 ZNF296 ICA1 RABEP2 POMT1 SMARCC2 TTC9 NECTIN2 GALNT6 MXRA8 IVD SLC7A8	NO
CHARAFE_BREAST_CANCER_LUMINAL_VS_MESENCHYMAL_DN	0.0657174	0.34234	0.181383	0.299558	1.2318	366	CNRIP1 FOXC1 MAP1B COL13A1 LPAR1 NRP1 SEMA3A MXRA7 GNG11 RNF182 ANXA1 IL15 STRADB PDGFC AKR1C3 TCEAL9 TMEM158 NECTIN3 SERPINB1 SOCS3 CASP1 AP1S2 CTNNAL1 SRGN SLC25A37 IGF2BP2 FAS G0S2 SNRPD1 WWTR1 BASP1 STIL RAB31 PSMB9 ANXA5 PTPRG CHSY1 DNAJB4 RGS2 PROS1 PMP22 LYN TFPI TAP2 CYP26B1 IFI16 ANLN P3H2 BACH1 ITPRID2 PPP4R1 PTPRM IGF2BP3 ZC3H12C FAM200B AXL EMILIN2 CCDC82 MARVELD1 MPP1 QKI BCAT1 B3GNT…	NO
CHARAFE_BREAST_CANCER_LUMINAL_VS_MESENCHYMAL_UP	0.140166	0.489956	0.249247	-0.226056	-1.09497	334	CACNB3 SLC29A2 SLC16A14 CGN LSR CREB3L4 BLNK ZG16B TJP3 HIP1R MACC1 JMJD8 WFS1 ELL3 LMTK3 DEGS2 BIK ARHGEF5 PGAP3 BICDL2 C11orf80 ATP2C2 FAM102A GSTO2 PLXNA3 ZNF165 NME3 ESR1 TNKS1BP1 IRF6 CACFD1 EPPK1 RTL10 CLDN7 VIPR1 PCK2 MCF2L PAQR4 FAM110A TRAPPC6A PPDPF SIDT1 RHPN1 ZBTB42 KIFC2 PCDH1 ULK3 ZHX2 SYMPK ELF3 TMPRSS13 SLC25A29 ICA1 BICDL1 RABEP2 TTC9 GALNT6 HOOK2 SLC7A8 CRIP2 MAP7 PPFIBP2 SH2D3A…	NO
CHAUHAN_RESPONSE_TO_METHOXYESTRADIOL_DN	0.179045	0.55616	0.115734	0.325466	1.1734	96	B2M ADM MARCKS MXI1 AP1S2 FOXO3 NPC2 BTF3 ARPC5 ATP5PO LITAF ARL6IP1 AP3S1 COX6A1 CD48 EEF1A1 NCSTN SEC61G WBP2 TNFAIP3 TPP1 NRDC ATP6V1F LGALS1 MCL1 BTG1 CD164 LTA4H UBE2J1 FDPS PGK1 TAPBP ATP5MF RPL12 NAP1L1 NUCB1 TMSB10 EIF3M EIF3K ERP29 HERPUD1 ZFP36L2 BTG2 EIF4B MDH1 HCLS1 YWHAB TMSB4X	NO
CHAUHAN_RESPONSE_TO_METHOXYESTRADIOL_UP	0.53012	0.866224	0.0988903	-0.27042	-0.947803	38	WNT11 PTTG1 SRM MYC CHMP7 ASNS	NO
CHEBOTAEV_GR_TARGETS_DN	0.185083	0.564175	0.116234	0.342891	1.1895	71	TMEM255A IGFBP3 DNAJC6 NRXN3 SORCS3 JAZF1 PLA2G4A CLEC11A PALLD RTN2 ZFP36L1 ZNF704 SLC14A1 NEXN SVIP C11orf65 FGGY DPY19L1 MME CRISPLD2 MYL9	NO
CHEBOTAEV_GR_TARGETS_UP	0.724823	0.964007	0.0446854	0.253488	0.839287	55	P4HA2 NRP1 FZD1 PDGFRA TNFRSF21 CPEB3 DOCK5 CCDC71L TMEM140 FKBP5 TTLL7 MYB HPGD LCORL BCL2L11 TSPAN13	NO
CHEMNITZ_RESPONSE_TO_PROSTAGLANDIN_E2_DN	0.613455	0.91446	0.0423318	0.233682	0.940777	277	SATB2 SLPI SNORA74A FOXC1 FAM110B NRXN3 DYNC2LI1 LCN2 FZD1 FAT1 WDFY3 RWDD1 CLDN12 TVP23B IQCH ZSCAN31 C12orf75 TMEM252 NSUN7 EPS8L1 ABHD11 EVC AKAP5 KCNJ15 GALNT3 RBM47 TPMT RBMS2 DYNLT1 NFIA LRRK2 CCDC30 TNFRSF10C PPM1A TNFSF13 TGFBR3 KLF4 GORASP1 TNFSF10 ODC1 DNAJC1 TXNIP SEMA5A ACAA2 SDHAF3 SPTLC2 MITF IQCA1 KIF1B MED11 SLC39A8 PLS1 VTI1B EFCAB6 CYB5D2 MINDY2 DAZAP2	NO
CHEMNITZ_RESPONSE_TO_PROSTAGLANDIN_E2_UP	0.0472624	0.297089	0.321776	-0.292351	-1.26849	132	AFAP1L1 BIRC5 RRM2 UBE2C CCNB2 PRAF2 CDC45 BUB1 OLFML2A FLT1 GTSE1 CDC6 PTTG1 CENPF CDKN3 UHRF1 KIF20A URB1 MKI67 NUP210 TRIM28 CHMP7 TPD52 SLC16A1-AS1 MCM4 C19orf48 MZT2A CENPU SLC39A14 PCLAF SPDL1 DIPK1A UAP1 HJURP	NO
CHENG_IMPRINTED_BY_ESTRADIOL	0.955645	1	0.0291396	0.191835	0.677589	80	FZD1 MXI1 YBX1 OTX1 LRR1 PTPRG DDX50 KIAA0408 ZFP36L1 ZNF467 AURKA GOLT1B ZNF420	NO
CHENG_RESPONSE_TO_NICKEL_ACETATE	0.0257927	0.221233	0.352488	0.499553	1.55257	41	MAP1B TCF7L2 HSPE1 MS4A6A CD68 H19 USP16 RNF13 RBBP8 PI4K2B SLA CEBPD GTF2A2 TXNDC12 HSP90AA1 GDI2 ACTR2 RAB1A ST13 ATP1B1 ABCC3 POLR2C DHRSX TLK2	NO
CHEN_ETV5_TARGETS_TESTIS	0.80813	0.995901	0.0459538	0.282175	0.742694	19	NFYB CCNE2 DMC1 HAUS6 TGFBR1 AK4	NO
CHEN_HOXA5_TARGETS_9HR_DN	0.512195	0.855597	0.0642141	0.322672	0.975124	36	RTL8C PCDHGC3 MARCKS GM2A AP1S1 CKAP4 TRIM34 MYL9 ST6GALNAC4 KDELR1 ANPEP	NO
CHEN_HOXA5_TARGETS_9HR_UP	1.77516e-06	0.000163193	0.643552	0.466899	1.83751	203	GEM ZCCHC10 SAT1 ATF3 KRCC1 NFIL3 TMEFF1 ZNF267 ZNF107 KLF10 GADD45B TBK1 CLEC4A FOXO3 ZSCAN16 PMAIP1 BIRC2 TANK CREB5 DUSP6 IFI16 CEBPB BACH1 KIF18A PPIG MORC3 ETS2 POLR3F SMCHD1 ZNF112 ZNF468 JUNB KLF5 ZNF14 PELI1 PTGS2 ODR4 CDK7 ZNF184 CLK1 VCPKMT RIPK2 TBC1D31 FOS FAM53C LIG4 CASP3 FEM1C IFRD1 ZNF222 TNFAIP3 NFKBIA SUPT20H PGS1 CDK17 RLF NRBF2 RCAN1 PPWD1 TRPC1 KLF6 ARID4B STRN3 MCL1 MARK3 ZN…	YES
CHEN_LIVER_METABOLISM_QTL_CIS	0.0673077	0.347526	0.202072	0.388711	1.35125	72	DBI ITLN1 TLR5 SPTA1 RGS18 MNDA FCER1G RGS5 DUSP23 DUSP12 CD48 PLXNA2 C2orf76 ODR4 TSEN15 CD244 DDR2 FCGR2B SLC30A1 NIT1 USF1 TMEM183A F11R TOR1AIP1 VPS4B MARCO PIGM FAM20B HES6 ACTR3 RPS6KC1	NO
CHEN_LUNG_CANCER_SURVIVAL	0.376603	0.769065	0.0824344	0.399129	1.07621	22	ANXA1 HPRT1 SERPINA1 KRT1 ATP5F1D RAB14 KRT8 PGK1 GRK4 GSTP1	NO
CHEN_LVAD_SUPPORT_OF_FAILING_HEART_DN	0.00125794	0.0302878	0.45506	0.66477	1.85783	25	S100A8 HBB NRP1 IFIT1 B3GALT2 MARCKS F5 G0S2 CD14 CTSB TNFSF10	NO
CHEN_LVAD_SUPPORT_OF_FAILING_HEART_UP	0.15491	0.514253	0.128789	0.349748	1.21928	74	SH3BGR PDK4 ATF3 NFIL3 GADD45B FOXO3 MT1E GLUL CEBPB MTHFD2 FNDC3B MT1X TXNIP FKBP5 XK TSC22D3 CD163 BCL6 CDC37L1 ZFAND5 CEBPD ZFP36 AMD1 PLIN2 NFKBIA	YES
CHEN_NEUROBLASTOMA_COPY_NUMBER_GAINS	0.628049	0.920456	0.0545681	0.294966	0.891398	36	RPS7 IGF2 TAF7 YPEL5 ODC1 LYVE1 TRIM23 SGTB TAF1B PPWD1 ZFHX3	NO
CHEN_PDGF_TARGETS	0.969697	1	0.057853	-0.199734	-0.553532	15	MYO1E LMNA ARID5B GOT1	NO
CHEOK_RESPONSE_TO_HD_MTX_DN	0.428339	0.8048	0.0764767	0.392394	1.03742	20	BNIP3L AP1S2 STRAP ARF4 NUP98 KATNB1 CNOT8 DYRK1A CRYZ	NO
CHEOK_RESPONSE_TO_HD_MTX_UP	0.0439622	0.288779	0.321776	0.57618	1.53804	21	S100A8 DEFA4 S100A9 OLFM4 LYZ DEFA1	NO
CHEOK_RESPONSE_TO_MERCAPTOPURINE_AND_HD_MTX_DN	0.742297	0.971416	0.0760837	-0.261998	-0.822097	25	NPFF FCER2 SREBF2 ABCA2	NO
CHEOK_RESPONSE_TO_MERCAPTOPURINE_AND_LD_MTX_DN	0.175698	0.550898	0.132147	0.49548	1.28638	18	S100A12 LCN2 CDKL1 CTSL ELANE	NO
CHEOK_RESPONSE_TO_MERCAPTOPURINE_DN	0.180624	0.557156	0.130106	0.492896	1.27967	18	HAT1 APOBEC3B CA3 SOCS6 RBBP8 CUL4B SORL1 LST1 CIR1 PMVK LAPTM4B	NO
CHESLER_BRAIN_HIGHEST_EXPRESSION	0.305136	0.710988	0.0908241	0.394492	1.14218	29	UQCRB PPP1CB HINT1 ACSL4 FTL KCTD12 FOS SP3 GLO1 ATP6V0B PPID MATR3 ANKRD13C LIN7C KMT2E ATP11A DCTN3 ZRANB2 HNRNPA2B1	NO
CHESLER_BRAIN_HIGHEST_GENETIC_VARIANCE	0.134036	0.479032	0.146416	0.447344	1.30081	30	BCL2A1 MAP1B ACKR1 PHLDA1 C4orf3 PSTK	NO
CHESLER_BRAIN_QTL_CIS	0.885222	1	0.0359969	0.22355	0.739191	57	SPOCK1 ACKR1 PHLDA1 SCOC C4orf3 SRP9 EEF1AKMT1	NO
CHIANG_LIVER_CANCER_SUBCLASS_CTNNB1_DN	0.27141	0.676018	0.0897105	0.301211	1.09875	109	SLPI GEM EVI2A CYP4F22 KLRB1 LGALS3 VCAN YBX3 LGALS4 PTGDS SOCS3 GLT1D1 VNN2 BASP1 S100P PLBD1 PMP22 CDH1 SLC22A15 CXCL16 PAPLN CD52 ETS2 PELI1 ACSL4 UGCG KCTD12 XK TIMP2 MYL9 TNFSF13B CYBA SPHK1 HPGD RAB27A	NO
CHIANG_LIVER_CANCER_SUBCLASS_CTNNB1_UP	0.19135	0.572281	0.110565	0.316476	1.15367	106	FGF13 SLC2A12 FRMD3 ABCG2 PDK4 AQP9 FAS WASHC3 PTPRG CD36 FAM8A1 GLUL TPRG1 MERTK SLC22A4 SULT1B1 NAGS NEK3 TSPAN5 SLC6A12 SELENBP1 SHLD2 CAVIN2 ACSS3 HSDL2	NO
CHIANG_LIVER_CANCER_SUBCLASS_INTERFERON_DN	0.693642	0.949181	0.0813027	-0.247085	-0.863428	36	ESM1 DNM1 ATP6V0E2 NKD1 BTNL9 PRAG1	NO
CHIANG_LIVER_CANCER_SUBCLASS_INTERFERON_UP	0.0755337	0.365977	0.208955	0.551374	1.43149	18	EVI2A ISG15 MS4A4A KLRB1 STAT1 GPR65 CALCRL ACSL4 FCGR3A HPGD FCGR2B	NO
CHIANG_LIVER_CANCER_SUBCLASS_POLYSOMY7_DN	0.350962	0.754125	0.0862866	0.409757	1.10487	22	STOX2 SERPINB1 GNL3 PLOD2 ASAP1 ROBO1	NO
CHIANG_LIVER_CANCER_SUBCLASS_POLYSOMY7_UP	0.142405	0.493473	0.2114	-0.338356	-1.21879	42	LAMB3 HAAO DHRS1 ADAMTS17 TKFC CDHR3 WNK3 CLDN15 MAD1L1 ICA1 ELAVL1 PILRB TRIM35 ABCB4 POLD2	NO
CHIANG_LIVER_CANCER_SUBCLASS_PROLIFERATION_DN	0.169884	0.540449	0.213928	-0.295926	-1.1955	86	MYO1B GPT2 GAMT NUDT6 AKR7A3 HAAO DHRS1 SERPING1 RDH16 PNPO HSD17B6 WNK3 CYP27A1 SEC14L2 MLYCD FMO4 CTH MTHFD1 OASL BOK GPLD1 ALDH6A1 ABCB4 LONP2 AASS DEPDC7	NO
CHIANG_LIVER_CANCER_SUBCLASS_PROLIFERATION_UP	0.0179359	0.182288	0.352488	-0.297316	-1.32881	159	CDC20 KIF2C BIRC5 NEK2 UBE2C DEPDC1B ZWINT CEP55 CCNB2 CCNE1 ORC6 SALL2 GINS1 TRIP13 KIF18B CDCA7L VEGFB CDC6 PTTG1 CENPF CDKN3 SYNJ2 MCM2 CENPK KIF20A ABCC1 BACE2 SKA1 MKI67 CCNA2 PAFAH1B3 SEL1L3 KIF11 CDCA5 KIF4A	NO
CHIANG_LIVER_CANCER_SUBCLASS_UNANNOTATED_DN	0.000134982	0.00572833	0.518848	0.443985	1.72078	182	SF3B6 RAD51AP1 DBI HAT1 NDUFA4 POLE2 ACTR6 DPM1 DPCD RPA3 HAUS1 CAPZA2 VBP1 CNN3 SNRPD2 CTNNAL1 WDSUB1 YBX1 RFC4 PSMA2 LYZ SNRPD1 MRPL13 MCTS1 ATG3 TSPAN6 DNAJA1 FCER1G RCN2 CMAS SMIM26 C1GALT1C1 LAMTOR5 DCUN1D5 TMX1 TYROBP FUCA2 VAMP3 UBE2E3 SNX2 TPRKB CIAO2A SPOPL COPS3 GPR160 SEC11A ABCB10 FCGR3A IMPA2 MORN2 MRPL44 TM9SF2 CLNS1A TMEM50A CD46 HIKESHI CCT2	NO
CHIANG_LIVER_CANCER_SUBCLASS_UNANNOTATED_UP	0.735211	0.969338	0.0437126	0.24854	0.832981	60	B2M LEPR NAMPT UBE2B MARVELD2 CPEB4 DOCK5 ETS2 HSDL2 MAP3K13 ZFAND5 SLC20A1 SORL1 TNFSF14 NCOA2 ARMC8 GSAP	NO
CHIARADONNA_NEOPLASTIC_TRANSFORMATION_CDC25_DN	0.534188	0.869512	0.120985	-0.226668	-0.963004	116	S100A13 CCN2 PLTP GAMT COL4A1 PLEKHA7 TNXB ACOT7 GSTM1 IGFBP4 FBN1 AGRN CD151 ABCC1 MYO1C ABHD8 BAIAP2 ASNS ICA1	NO
CHIARADONNA_NEOPLASTIC_TRANSFORMATION_CDC25_UP	0.158967	0.521934	0.12564	0.339808	1.20428	85	IGSF10 C3 LPAR1 PDK4 PLSCR1 ERRFI1 VCAN PHLDA1 IGF2 F2R IL1R1 MNDA MYL12B CYP1B1 CEBPB BACH1 TMEM176A RBM3 CTSB PTEN CEBPD SLC6A8 GTF2A2 PGRMC1 EMB PTX3 RAB11A LAMP2 TMEM176B FGFR2 TOP1 LXN TAF1D LTBP2 HMGN2	NO
CHIARADONNA_NEOPLASTIC_TRANSFORMATION_KRAS_CDC25_DN	0.00313333	0.0588136	0.431708	0.569668	1.72155	36	SLPI IGSF10 C3 PDK4 FAS IL1R1 PROS1 CYP1B1 CEBPB TMEM176A RNASE4 AP3S1 PTGS2 FOS ZFP36 EMB PTX3 TMEM176B FGFR2 LXN LTBP2	NO
CHIARADONNA_NEOPLASTIC_TRANSFORMATION_KRAS_CDC25_UP	0.469653	0.834866	0.0658312	0.318276	1.00432	43	EVI2A VAMP5 SERPINA1 WWTR1 CLIC1 GGCT SEMA5A CASP3 SPP1 SPTSSA TGFBI PLP2 CDKN1A CD9 GADD45A LAPTM4B	NO
CHIARADONNA_NEOPLASTIC_TRANSFORMATION_KRAS_DN	0.188976	0.570305	0.111463	0.31774	1.15861	107	SLPI SLC4A3 LPL GAS1 ISG15 ADM ATF3 AQP1 SEMA3C SOCS3 PRSS23 VAMP5 SNX10 ASAH1 SLC1A5 PMP22 RBMS2	NO
CHIARADONNA_NEOPLASTIC_TRANSFORMATION_KRAS_UP	0.915584	1	0.0295645	0.205802	0.749404	103	CRISP3 EVI2A PLSCR1 PSMA3 PHLDA1 HPRT1 BACH1 ERH RBM3 CTSB SPRED2 AURKA SPP1 IGF2R SPTSSA SLC6A8 GTF2A2 MAPK6 MRPL18 NFKBIA CDC7 TNFAIP2 E2F8 NCAPH	YES
CHIARETTI_ACUTE_LYMPHOBLASTIC_LEUKEMIA_ZAP70	0.30033	0.707217	0.144631	-0.279382	-1.0784	58	JCHAIN CCN2 BRF1 TTN ZAP70 BAIAP2 PCSK7 DGKA CD200 HMGXB3 KMT2B PI4KA AIP TCF20 IL27RA LCK TP53BP1 ITFG2 SFI1 AP3D1 COA1 RETREG3 ATM XPC CNOT9 BBC3 IFT20 SF3B3	NO
CHIARETTI_T_ALL_REFRACTORY_TO_THERAPY	0.134921	0.481052	0.197822	-0.421119	-1.29987	23	DNTT TCF7 EPHB6 PCDH9 ADA CR2	NO
CHIARETTI_T_ALL_RELAPSE_PROGNOSIS	0.556478	0.881175	0.0643583	0.361116	0.926702	17	DEK MEF2A RCBTB2 CDC7 USP1 NDC80	NO
CHIBA_RESPONSE_TO_TSA	0.68787	0.947165	0.0489954	0.280875	0.867192	40	NEAT1 STAT1 PNRC1 SDC4 OPTN DUSP1 GRN ZDHHC9 TPP1 USB1 BSG CDKN1A TXNRD1 ATP6AP2 JMJD1C RHOA TGM2 ZBED3 IFITM3	NO
CHIBA_RESPONSE_TO_TSA_DN	0.659033	0.936844	0.0772747	-0.299514	-0.863393	18	DSP DMD CEACAM1	NO
CHIBA_RESPONSE_TO_TSA_UP	0.575221	0.89232	0.0928481	-0.272556	-0.924943	34	MMP11 CCN2 FOSB CAV2	NO
CHICAS_RB1_TARGETS_CONFLUENT	0.0311339	0.248641	0.352488	0.310357	1.28212	403	TMTC1 GALNT5 PRSS35 MAP1B CAMK2N1 SPOCK1 RTL8C RAD51AP1 OLR1 SGCD MIR155HG NRP1 NRXN3 C3orf14 MAGI2-AS3 MYOF POLE2 NTN4 ARL4A B3GALT2 CHN1 CCNE2 JAZF1 GASK1B ANXA1 TENT5C ERRFI1 NIPSNAP3A SIPA1L2 LIN7A APOBEC3B RWDD1 SEMA3C NMI CNN3 C12orf75 PRSS23 ADGRG6 FAM171B RPL22L1 IFITM2 KCNMA1 PSMB9 WASHC3 S100A6 TENM4 FBN2 KDM1B PALLD C1R TMTC2 MAP3K7CL PMP22 EIF4EBP1 AK1 SCN9A MTUS1 IFI16 CDC42EP3 GAS6 …	NO
CHICAS_RB1_TARGETS_GROWING	0.0337549	0.260409	0.321776	0.349952	1.35942	187	FANCL IGFBP3 RAD51AP1 NRP1 NRXN3 MAGI2-AS3 ANXA3 AKR1C1 POLE2 CDC42BPA PLPP3 ARL4A NFYB B3GALT2 RPA3 HAUS1 NUSAP1 CCNE2 GASK1B MARCKS LIN7A APOBEC3B NMI ADGRG6 HPRT1 RFC4 KCNMA1 DEK WASHC3 CHAC2 ZNF22 C1R EIF4EBP1 IFI16 S1PR3 C1orf21 PPIG AXL TSPAN5 KIF14 SLC14A1 TIFA PDGFD TICAM2 BNC2 PYGL RBBP8 CEP57	NO
CHICAS_RB1_TARGETS_LOW_SERUM	0.00975961	0.125127	0.38073	0.453223	1.59827	79	RPL36A TOMM7 COPS9 C4A RPA3 NDUFB1 CCNE2 SNRPG NDUFA1 ZFAS1 LMNB1 ROMO1 CKLF MT1E ATP5MG NDUFA3 EIF4EBP1 ATP5ME PET100 SNRPE COX7C ELOB MT1X ZYX	NO
CHICAS_RB1_TARGETS_SENESCENT	0.0163633	0.173129	0.352488	0.316837	1.31235	440	COL10A1 CNRIP1 C3 BCL2A1 NRG1 FANCL IGFBP3 GEM ISG15 C3orf14 HAT1 PI3 PLSCR1 CDC42BPA LRP11 FRMD4A LGALS3BP RPA3 HAUS1 NUSAP1 CCNE2 ISG20 FZD1 UBE2L6 C9orf40 CISD2 PLEK2 LSP1P4 SLC27A3 IGF2 CXCL10 LMNB1 NAMPT HPRT1 CBR3 HPSE RFC4 IFITM1 SLC25A37 ITPRIPL2 PPBP TEX30 CKLF G0S2 SERPINA1 WWTR1 GK RAB31 DEK CD69 TNFSF15 GON7 EIF4EBP1 GLUL CYP26B1 NQO2 SFR1 THBD DDX60 SRGAP2B OSBPL8 RGS5 TSPAN5 CTSS CX…	YES
CHIN_BREAST_CANCER_COPY_NUMBER_UP	0.425587	0.803386	0.103576	-0.334046	-1.00935	21	E2F5 CCND1 MYC THRA	NO
CHNG_MULTIPLE_MYELOMA_HYPERPLOID_DN	0.823795	0.999914	0.0415718	0.256327	0.74536	30	GABARAPL2 UBE2D1 RNF187 EIF1 EMG1 TMED2 VPS35 EIF4EBP2 YME1L1 GABARAPL1 CACYBP SLBP PACSIN2 COPA MCFD2	NO
CHNG_MULTIPLE_MYELOMA_HYPERPLOID_UP	0.0228459	0.208184	0.352488	0.473738	1.54382	51	RSL24D1 RPS17 RPL21 EEF1B2 RPL35A RPL35 RPL24 RPS6 RPL27A RPL15 RPL4 RPS9 RPS14 RPS13 RPL13A EEF1G UBA7 NPM1 IMP3 RPL32 EIF4A2 RPLP2	NO
CHOI_ATL_CHRONIC_VS_ACUTE_DN	0.745847	0.972398	0.0506004	0.309436	0.794081	17	CMTM6 SUMO1 UBE2E1 MAT2B GTF3A ATP6V1A PPP1CC ANAPC16 MDH1	NO
CHOI_ATL_STAGE_PREDICTOR	0.205318	0.590593	0.113787	0.380321	1.1987	44	CMTM6 CD52 FTL SEC11A RRAGC IL17RA GMFB PPP2R2A COMMD3 UBE2E1 RAB5IF MRFAP1L1 ST13 EIF5 TTYH2 SMIM19 SLC25A46 NAP1L1 MTRF1L RAPGEF2 PLEKHJ1 TSPO	NO
CHOW_RASSF1_TARGETS_DN	0.0468278	0.29626	0.257206	0.495461	1.43452	29	POLR2K CREG1 FOXO3 SNRPD1 BCL3 BST2 OPTN	NO
CHOW_RASSF1_TARGETS_UP	0.492777	0.847596	0.0686326	0.361327	0.99212	24	LSM3 RFC4 COX7B FKBP15 CARD8 INSIG1 CCL5 CHD1 PEX1 ALCAM ARRB2 PARP2	NO
CHO_NR4A1_TARGETS	0.796446	0.99249	0.0463228	0.284857	0.76039	21	ATF3 DDIT3 ABCC6 INSIG1 PPP1R15A SLC3A2 FUT7 HMOX1 ATF4 HERPUD1	NO
CHUANG_OXIDATIVE_STRESS_RESPONSE_UP	0.666667	0.940424	0.0541201	0.314772	0.856959	23	DDIT3 FAS CYP1B1 NQO1 H19 MT1X EDN1	NO
CHUNG_BLISTER_CYTOTOXICITY_DN	0.0383481	0.274545	0.282013	0.460741	1.45652	45	CSTA GCA IRAK3 RGS18 KAT2B MNDA CDC42EP3 PCMTD1 P2RX1 PPM1A SLC40A1 ITGB2-AS1 SNN CFP MED13L FKBP1A MAML3 KIAA0513 MTPN BIN2 SNAP23 RIPOR2 PRAM1 FBXO38 HACD4 SELL MAX STXBP5 NIN	NO
CHUNG_BLISTER_CYTOTOXICITY_UP	0.466921	0.833677	0.0599892	0.266147	0.99592	131	FANCL C1QB MIR155HG CISD2 CD3D ZWILCH CKS2 FLVCR2 MT1E GZMB ADAP2 SDC4 CTSL CTSB DIABLO NTAN1 RBBP8 HAVCR2 PAIP1 TNFAIP3 PLIN2 TIMM23 CCR5 SLC43A3 CDKN1A CTSC COPS8 MRPL57 COQ5 SLAMF8 LCMT1 THYN1 SYT11 SYTL3 PSMD13 SOD1 CD86 BOLA2	NO
CHYLA_CBFA2T3_TARGETS_DN	0.000359239	0.0119599	0.498493	0.428563	1.64309	165	RANBP17 S100A8 CD177 MMP14 MMP8 P4HA2 TSPO2 S100A9 PAQR9 BCAM CYP4F22 NTN4 ISG20 LCN2 RHCE ACKR1 MBOAT2 CTSE KIAA0895 WDSUB1 IFITM1 SLC7A7 GBP6 ALAS2 MARVELD2 CHAC2 SPIRE1 CAMP TTC39A NQO1 LTF NAGS TFR2 NFIA SLC38A5 BLVRB RHAG ZFP36L1 HEBP1 EVI5 EPB42 MGST3 KLF5 SLFN12 SORBS1	NO
CHYLA_CBFA2T3_TARGETS_UP	0.0282746	0.236023	0.352488	0.322531	1.30486	292	STOX2 SLPI RSPH9 NRG1 PARD3B THNSL2 RASSF8 GZMA CXXC4 TCN2 OLR1 CLEC4D ANXA3 GMFG KLRB1 CST7 HP P2RY14 FFAR2 PLEK2 HNMT GCA TMEM144 ALPK1 SERPINB1 SERPINB10 GADD45B RNASE2 CASP1 F2R FCGR2A HPSE PPBP CLEC12A RAB31 MEFV P2RX7 ANXA5 EVI2B LDLRAD3 GPR65 CSRNP1 C1R HK3 MYCT1 CLEC5A CX3CR1 MGAM GZMB IGSF6 C1orf21 CEBPB RALB TNFRSF12A ZC2HC1A RHOQ MCTP1 CLEC4E S100A11 UNC93B1 STARD8 ATP8B4 FNDC3B UPK3BL…	NO
CLASPER_LYMPHATIC_VESSELS_DURING_METASTASIS_DN	0.754808	0.977179	0.0484088	0.294157	0.793163	22	LPAR1 VCAN SEMA3C S1PR3 EMILIN2	NO
CLIMENT_BREAST_CANCER_COPY_NUMBER_UP	0.6925	0.949181	0.0738053	-0.297903	-0.84931	17	KCNQ3 CCND1 MYC	NO
COATES_MACROPHAGE_M1_VS_M2_DN	0.594502	0.905066	0.0999277	-0.240603	-0.931505	61	RIMBP2 GPRC5B MFGE8 ANG PROCR HSPA1B IL18BP SH2B2	NO
COATES_MACROPHAGE_M1_VS_M2_UP	0.207418	0.593565	0.108394	0.338447	1.17652	72	CNRIP1 MSR1 COLEC12 AIF1 PLXDC2 SLC7A7 SLC35A1 PIK3AP1 PLBD1 P2RY13 GNB4 DYNLT1 AXL FGD2 CD59 BLOC1S6 TXNIP HMGN3 RCBTB2	NO
COLDREN_GEFITINIB_RESISTANCE_DN	0.318573	0.725118	0.0772747	0.280986	1.07108	157	SLC2A12 ANKRD22 BSPRY MYO6 ANXA9 TACSTD2 GCA TBC1D8B FAM171B ENPP4 TMEM123 PRRG4 DAPP1 EPS8L1 LGALS9 LRG1 GALNT3 FGD4 CDH1 RBM47 C1orf21 CCDC149 PRRG2 ZNF91 TMEM40 REPS2 ZNF600 PTK6 AIG1 ZNF468 FRMD4B VAMP8 WDFY1 LIPH TMC5 SPOPL ENPP5 GPR160	NO
COLDREN_GEFITINIB_RESISTANCE_UP	0.852151	1	0.0347157	0.22108	0.780885	80	MAP1B TMEM158 GAS5 PTPRG BMERB1 RHOQ NFKBIZ BORCS7 PRELID1 KCTD15 PPIF C18orf21 CSGALNACT2 ARL3 PCGF6 IKBIP OLFM1 QPCT NSMAF CEBPG SACS TIMM50	YES
COLINA_TARGETS_OF_4EBP1_AND_4EBP2	0.0493119	0.30288	0.216543	0.315337	1.26889	273	LY96 C3 FOXC1 IL1RN ISG15 HAT1 LPAR6 NRN1 PLSCR1 C4A B2M EIF1AY LGALS3BP HAUS1 NUSAP1 GNG11 LCN2 MGST1 PHLDA1 VIT NAMPT CREG1 STAT1 VAMP5 SNRPD1 BAG1 PSMB9 ABHD11 TSPAN6 TCEAL1 PFDN1 SCARB2 C1R CD14 SUB1 BST2 TFPI IFNGR1 CR1 NQO2 ANLN TRIM25 ASNSD1 MFSD1 THBD SDC4 BLVRB IFI27L2 BCAT1 CD302 IL13RA1 VAMP3 CD59 AIG1 RNASE4 CTSH SLC41A2 SASH1 GRN RAP2A HSDL2 GBP2 PLOD2 RIPK3 CLTB BID DIAPH3 TIMM10 LR…	NO
COLIN_PILOCYTIC_ASTROCYTOMA_VS_GLIOBLASTOMA_DN	0.115447	0.444958	0.165657	0.508005	1.33708	19	ZFAND6 NPC2 TFRC SPP1 PLIN2 TGFBI TXNRD1 SLC30A9 PGK1 TRIM24 POLR2C CSNK1A1	NO
COLIN_PILOCYTIC_ASTROCYTOMA_VS_GLIOBLASTOMA_UP	0.466495	0.8331	0.0972151	-0.331438	-0.983858	20	GPRC5B OLIG2 PLEKHB1 HTRA1 PDZD2 SOX8 ITGA3	NO
COLLER_MYC_TARGETS_UP	0.0469831	0.296344	0.321776	0.555809	1.49868	22	NAMPT G0S2 CKS2 ODC1 TFRC PPIF HDGF CEBPZ AK4 POLR2H	NO
COLLIS_PRKDC_REGULATORS	0.42439	0.803151	0.0768737	0.393916	1.0368	19	HMGB2 XRCC4 HMGB1 LIG4 CASP3 PRKCD PPP2CA	NO
COLLIS_PRKDC_SUBSTRATES	0.613402	0.91446	0.0817516	-0.302728	-0.898635	20	JUN MYC ABL1 PARP1 CTDP1 SRF RPA1 TP53 SNRNP200	NO
CONCANNON_APOPTOSIS_BY_EPOXOMICIN_DN	0.0905612	0.393896	0.165657	0.336321	1.25687	130	SLC18A1 TNFAIP6 RTL8C DBI HMGB2 MYOF MAOA ADM RPA3 NDUFB1 RPH3A GNG11 SNRPG MARCKS VCAN TMEM158 MXI1 PDGFRA LIMK2 KCNMA1 TENM4 LDOC1 GM2A MTUS1 DOK4 NDUFA2 GTF2H5 RTN1 NFE2L3 TFRC EID1 HMGN3 NDUFB6 AURKA HK2 TBC1D30 DPY19L1 MYB SPTSSA SORL1	NO
CONCANNON_APOPTOSIS_BY_EPOXOMICIN_UP	0.00242104	0.0493357	0.431708	0.3819	1.50171	204	P4HA2 MAP1B NEAT1 GEM ACHE CEP170B AKR1C1 SAT1 ATF3 DTNA IL15 AKR1C3 FAT1 PLK2 DDIT3 FAS WWTR1 MIR22HG LMO2 DNAJB4 PALLD ME1 TTC39A DUSP3 CREB5 NQO1 MXD1 NQO2 CEBPB SRP19 BLVRB DUSP1 HSPA6 RIT1 TAF13 KIAA0319 SYCP2 ZYX CCPG1 MAP1A KIAA0930 EPB41 FOS CLTB IFRD1 MAP1LC3B ZFP36 SPP1 KIF1B SLC16A3 KLF6 UBE2H ACTA2 BCL2L11 CDKN1A CEBPG ALDH1A2 MICB N4BP2L2 GADD45A SLC7A5 POLR3C MBOAT7 IL6R SLC7A11 LGA…	NO
CONRAD_STEM_CELL	0.616402	0.915566	0.0828962	-0.292947	-0.892228	22	SALL2 PIWIL2 PHC1 REXO1 MYC	NO
CORRE_MULTIPLE_MYELOMA_DN	0.163142	0.528985	0.131458	0.416084	1.25399	35	COLEC12 LPAR1 GAS1 FZD1 LIN7A BLVRA FBXO6 SLC1A3	NO
CORRE_MULTIPLE_MYELOMA_UP	0.0723781	0.357325	0.202072	0.437679	1.37949	44	COL13A1 NRXN3 IL1B GLRX TLR4 HGD LMO2 SAMSN1 EIF4EBP1 MYCT1 TFPI	NO
COULOUARN_TEMPORAL_TGFB1_SIGNATURE_DN	0.465608	0.832436	0.0619763	0.274647	1.00101	110	IGFBP3 PLPP3 LGALS3 HCN2 ERRFI1 UBE2L6 STOM GADD45B SLC25A37 GK GLUL DUSP3 DUSP6 LRP1 SELENBP1 MSRB1 CYP51A1 DGAT2 GSTO1 NFKBIA MSMO1 ACSL3 HPGD HMGCS1 IDH1 DYRK3 CHP1 GADD45A GCNT2 ALDH3A2 GSDMD FDPS ALCAM	YES
COULOUARN_TEMPORAL_TGFB1_SIGNATURE_UP	0.0803213	0.373359	0.181383	0.363399	1.30069	92	RASSF8 NRP1 ZCCHC10 MAP3K20 PDCD10 IDI1 ARHGAP29 CXCL10 TBCEL C9orf72 BCL3 IFNGR1 RBM47 CXCL1 PICALM FGD6 IER3 FCHO2 DHX32 IQGAP1 SLC40A1 SLC20A1 SLC35D2 SLC6A8 LPGAT1 AMD1 TNFRSF1B TGFBR1 ALS2 VCPIP1 NKAPD1 NAB1 BTG1 FOSL2 NFE2L2 SLC48A1	NO
COWLING_MYCN_TARGETS	0.528351	0.864901	0.0899861	-0.321641	-0.954778	20	MFGE8 FBLN5 TAGLN MYL5 LBH	NO
CREIGHTON_AKT1_SIGNALING_VIA_MTOR_DN	0.990307	1	0.0363018	0.202477	0.540487	21	TNFRSF12A MRPS7 ATP6V1F ATP6V0B ATP6V0C KRT8 ATP6AP1	NO
CREIGHTON_AKT1_SIGNALING_VIA_MTOR_UP	0.87574	1	0.0704501	-0.226888	-0.752056	30	TJP3 BIK NECTIN2 CDK16 SLC37A1	NO
CREIGHTON_ENDOCRINE_THERAPY_RESISTANCE_1	0.627409	0.920318	0.0383996	0.229783	0.950264	415	COMMD6 SEMA3D RIDA IL1RN HMGB2 NUAK1 MYOF CSTA NAP1L2 ARL4A DLC1 DTNA NUSAP1 TNNT1 DYNLT3 FKBP3 SNRPD2 PRLR COPS2 KYNU PRSS23 GAS5 AP1S2 ADGRG6 HPRT1 RPL22L1 SIAH2 CCDC112 SNX10 RAB31 PTPRG HAUS4 ZNF22 LDLRAD3 MRPL52 TCEAL1 SRGAP2 PALLD MDP1 STARD13 LDOC1 TRPC6 RTN2 PMP22 WDR89 MYBL1 BATF TET2 PROSER2 PRDX6 WASF1 BMERB1 MARVELD1 ARPC5 SGK3 SNRPE ATP5PO DUSP23 RSRC1 PRR11 UBAP2 NTAN1 ACSS3 KCTD15 …	NO
CREIGHTON_ENDOCRINE_THERAPY_RESISTANCE_2	0.690423	0.948616	0.0357691	0.227051	0.92446	313	RSPH9 CDKL3 KIAA1549 DNAAF4 IFT81 BBOF1 RSAD2 CCDC96 ACTR6 DPCD SERPINI2 CFAP53 JAZF1 CCDC65 RNF182 RAB9B NAA38 MELTF NEK11 IQCH SPATA6 MAK C5AR1 RSPH4A CFAP36 STIL FBXL13 GON7 ELOA-AS1 TSPAN2 LRRC23 ISM1 CAPS2 CCDC30 B4GAT1 TMEM67 GSKIP AIG1 CDKN2D EFCAB2 NOD2 ZNFX1 IQCG CEP70 IFT22 GLIPR2 KCNE1 TBC1D31 TTC26 PHF7 MSL3 ZNF200 FAM229B PTPN22 MORN2 RMI1 ABITRAM CCP110 EFCAB12 PSME2 SLC31A2 EFCAB6 …	NO
CREIGHTON_ENDOCRINE_THERAPY_RESISTANCE_4	0.365006	0.762632	0.0673624	0.263042	1.04623	230	P4HA2 COX6C COPS9 NRXN3 CALHM6 DPY30 DLC1 CHN1 TIMM9 FGFBP2 VCAN YBX3 HNMT F12 METTL5 CCNA1 SLC27A3 C12orf75 PRSS23 SIAH2 FOXO3 SAP30 RAB31 PLIN5 TSPAN6 PMAIP1 TTC39A CYP1B1 MYBL1 LYSMD2 GNB4 RAP2C RHOQ H19 TMEM167A AFF1 SGK3	NO
CREIGHTON_ENDOCRINE_THERAPY_RESISTANCE_5	0.0195403	0.190229	0.352488	0.31424	1.29871	395	FGF13 NEBL CRISP3 INHBB DBI COLEC12 BCAM ANXA3 LRP11 RIOK3 SAT1 RIN2 MXRA7 GASK1B FAM210B ACSL1 TACSTD2 PLK2 STOM BCAS1 FZD5 ATP6V1G1 LIMK2 RNF11 KCNMA1 FLVCR2 PPP1CB IL1R1 SGSM1 LHFPL2 EPAS1 MEF2A VMP1 CLIC1 SPIRE1 ASAH1 PLBD1 RHOU HCAR3 PMP22 LGALSL GALNT3 SOCS6 TRAFD1 MTUS1 NUDT4 EPB41L4A HIGD1A ST3GAL4 YPEL5 RNF144B ZC2HC1A QKI ZNF704 USP16 NXT2 PTK6 IL13RA1 PPM1A NCEH1 WSB2 LITAF HTR7P1 FAM2…	NO
CROMER_METASTASIS_DN	0.0790481	0.371883	0.287805	-0.346334	-1.35041	62	TPBG TNNT3 CELSR1 CAV2 SMTN C11orf80 TP63 PFKP TTLL12 PLEC MINK1 FLNB BAIAP2 LMNA TRIM16 ITGA3 BMP1 HSPA2 NOP2	NO
CROMER_METASTASIS_UP	0.432234	0.80869	0.125033	-0.256818	-1.00141	65	TUBB2B CELSR1 PTPRK TMEM63A MFGE8 PLCG1	NO
CROMER_TUMORIGENESIS_DN	0.461538	0.831127	0.0718276	0.373446	1.0167	23	IL1RN HOPX PTGDS S100P SELENBP1	NO
CROMER_TUMORIGENESIS_UP	0.460227	0.831127	0.103958	-0.308503	-0.99149	28	MYO1B MMP11 SERPINE1 SMOX PTK7 PLAU OASL BMP1	NO
CROONQUIST_IL6_DEPRIVATION_DN	1.14547e-05	0.0007534	0.593325	-0.488867	-1.9795	85	CDC20 KIF2C RRM2 UBE2C PLK1 ZWINT CCNB2 CDC25A CDC45 GINS1 TRIP13 KIFC1 CCNF BUB1 GGH SNRPA1 CDC6 PTTG1 CDKN3 WEE1 MCM2 POLD1 SPOUT1 MKI67 PLK4 CCNA2 KIF11 CHEK1 MCM4 MCM7 KIF22 SMC2 HMGA1 PCLAF	NO
CROONQUIST_NRAS_SIGNALING_DN	2.41358e-05	0.00138482	0.57561	-0.526155	-2.05156	62	CDC20 KIF2C UBE2C PLK1 ZWINT CCNB2 GINS1 TRIP13 SNRPA1 CDC6 PTTG1 CDKN3 WEE1 MCM2 POLD1 MKI67 PLK4 CCNA2 KIF11 CHEK1 MCM4 MCM7 KIF22 SMC2 GNAI1 HMGA1 PCLAF	NO
CROONQUIST_NRAS_SIGNALING_UP	0.0678733	0.348628	0.2114	0.462135	1.38314	34	MSR1 SV2B CYBB CX3CR1 LY86 DUSP6 NCF1C RP2 OSBPL1A ELF4 CD48 CCR2 CCL4 LGALS1 NCF2 CCL5 ST8SIA4 SNN	NO
CROONQUIST_NRAS_VS_STROMAL_STIMULATION_DN	0.00201292	0.0427415	0.431708	-0.429794	-1.68521	69	CDC20 KIF2C RECQL4 CCN2 UBE2C CCNB2 FOSB CDC45 CCNF COL6A3 CD81 SNRPA1 FSCN1 CDC6 PTTG1 IGFBP4 HES1 CDKN3 MCM2 JUN MKI67 CCNA2	NO
CROONQUIST_NRAS_VS_STROMAL_STIMULATION_UP	0.461422	0.831127	0.0689567	0.329295	1.00106	37	SV2B SLC7A7 CYBB CX3CR1 DUSP6 NCF1C TRIM25 RAB4B SPI1 CCR2	NO
CROONQUIST_STROMAL_STIMULATION_UP	0.217988	0.608741	0.111918	0.395568	1.19542	36	IGFBP3 MYOF VCAN SMARCD3 BASP1 RGS2 CXCL1 DUSP1 IER3 RPS4Y1 TSC22D3 MICAL2 FOS IGFBP7 CCL4 NFKBIA TGFBI OLFM1 ACTA2	YES
CUI_GLUCOSE_DEPRIVATION	0.531387	0.867067	0.0603786	0.298676	0.963369	49	SEMG1 NDUFB3 CBR3 ANLN DNAJC3 SGK3 GSDME TFRC TXNIP CCPG1	NO
CUI_TCF21_TARGETS_2_UP	7.31156e-06	0.000509918	0.610527	-0.336368	-1.60142	282	MDK SPC24 MMP11 CPNE5 LSR GRIP1 UBE2C LRRC56 PLTP CCNB2 NOC4L FBLN7 CDC45 CELSR1 CDCA3 SALL2 DIPK1B ZCCHC18 METTL1 MEX3A KRT18 CLCN2 NKD1 ANAPC15 PHACTR1 RAD51 CDCA7L TIMELESS ESR1 PTTG1 CD38 INCENP GPRASP2 CAD CD79B KCNK5 IGSF8 POLD1 UHRF1 CENPK FBLN5 PCDH9 PHGDH PYCR3 NRP2 ALDH16A1 PYCR1 SRM CCNA2 XRCC1 PAFAH1B3 TRAPPC6A ATAD3A DNAJC9 RNF227 TAF6L CDCA5 PRKAR1B MRPL9 MAP3K21 BCL7A MCM7 APBB1 ZN…	NO
CUI_TCF21_TARGETS_DN	0.184295	0.562133	0.126876	0.466489	1.25784	22	ADM TLR4 MERTK TSPAN2 EGF FAM241A GALC CD55 ADAMTS5 COL4A3 SERPINB6 PARP4 IQGAP2 SH3BGRL2	NO
CUI_TCF21_TARGETS_UP	0.312977	0.71911	0.122108	-0.381817	-1.10065	18	MDK PHGDH HJURP CADM1	NO
DACOSTA_ERCC3_ALLELE_XPCS_VS_TTD_DN	0.517628	0.85986	0.0661326	0.355431	0.967652	23	PLPP3 DLC1 VCAN IRF5 HMGN3 CXCR4 PPP2R3A VLDLR HMOX1 SOX4 SYNM	NO
DACOSTA_UV_RESPONSE_VIA_ERCC3_COMMON_DN	0.350107	0.753089	0.0655321	0.252161	1.04468	430	SATB2 MYO10 MAP1B NRG1 NUAK1 RBFOX2 TCF7L2 CDC42BPA XRCC4 DLC1 WASF3 STK3 FAT1 KLF10 SEMA3C ARHGAP29 USP12 NAA20 ADGRG6 CDYL NBN FOXO3 KIF20B STIL LHFPL2 CHSY1 SRGAP2 STARD13 LYN PTPRA ZNF804A MYBL1 PCMT1 NUMB IGF2BP3 IL1RAP ZDHHC17 OSBPL8 QKI TSPAN5 KIAA1109 RNF13 AFF1 KIF14 EVI5 DUSP1 SMCHD1 PICALM RAB6A PRKCI AFAP1 PIP4K2A CDC27 UGCG PTPN12 ITSN1 AGAP1 EIF4G3 SEMA5A BAZ1A DENND5A PKN2 PTENP1 P…	NO
DACOSTA_UV_RESPONSE_VIA_ERCC3_COMMON_UP	0.312586	0.71862	0.0845557	0.325497	1.10802	63	ATF3 CCNE2 TREX1 RGS2 FAM8A1 GLUL GNS SYF2 PNRC1 NAT1 CDC34 EFNA1 CLTB CEBPD SLC6A8 CDKN1C HLA-F BTG1 HRAS MICB RNF103 CBR1 ACYP1 PLPBP RSL1D1 DGAT1 NEU1	NO
DACOSTA_UV_RESPONSE_VIA_ERCC3_TTD_DN	0.712707	0.958889	0.0442407	0.248087	0.867808	76	DOCK4 LPAR1 CDC42BPA PLPP3 NECTIN3 CREB5 PTPRM USP15 RB1CC1 ZEB2 MITF ACVR2A ZFHX3 ARAP2 ATXN1 TOP1 NFIB DST TRIM24 AGO2 ACAP2	NO
DACOSTA_UV_RESPONSE_VIA_ERCC3_TTD_UP	0.840532	1	0.0785029	-0.213968	-0.80978	54	MDK CBX2 PLXNA3 PCDH9	NO
DACOSTA_UV_RESPONSE_VIA_ERCC3_UP	0.981797	1	0.0182442	0.183193	0.739144	287	RPL23 GAS1 ISG15 IFIT1 SAT1 ATF3 CCNE2 SMARCD3 TRIAP1 TREX1 IFI30 CBR3 RBM38 BAD CREG1 TEX30 IFITM2 BAG1 PMAIP1 RGS2 SLC1A5 FAM8A1 EIF4EBP1 GLUL DUSP3 CYP1B1 PLEKHO2 TRIM25 PNRC1 NPTXR NAT1 JUNB TNFSF13 CDC34 SMPDL3A SMIM10L1 GRINA	NO
DACOSTA_UV_RESPONSE_VIA_ERCC3_XPCS_DN	0.986413	1	0.0280811	0.179656	0.633546	79	DOCK4 NECTIN3 TGFBR3 RB1CC1 ZEB2 DLEU2 PTEN SOS2 PTX3 SP100 ARAP2 AKAP10 PDLIM5 ABCE1 DST AGO2 ACAP2 IGF1R VLDLR CTIF NAV3 TOGARAM1 ARHGEF10	NO
DACOSTA_UV_RESPONSE_VIA_ERCC3_XPCS_UP	0.754414	0.977179	0.048506	0.290163	0.796722	24	SAT1 COX6A1 CASP3 CDKN1C FRAT2 TRIM21 CCNT2 IRF1 HAUS3	NO
DAIRKEE_CANCER_PRONE_RESPONSE_BPA	0.753666	0.977108	0.0444181	0.265396	0.824829	41	PSMA2 SNRPD1 FAM8A1 GLUL GSPT1 PTEN FKBP5	NO
DAIRKEE_CANCER_PRONE_RESPONSE_BPA_E2	0.575597	0.892578	0.052163	0.262621	0.946821	96	HMGB2 PSMA6 TNNT1 VBP1 UQCRH MYL4 TXN RPS6 EIF4EBP1 BCAP29 PRDX6 ITGB1BP2 AP3S1 CAVIN2 MKNK1 KPNB1 ACAA2 IFRD1 PTP4A2 RPL15 RPL4 LST1 PPP2R2A PLP2 S100A4 RAB14 POLR2H LBR HMGN2 PPP2CA	NO
DAIRKEE_CANCER_PRONE_RESPONSE_E2	0.958763	1	0.0593488	-0.209911	-0.623111	20	DAAM2 ERCC2 MYOM2 PPFIA4	NO
DANG_MYC_TARGETS_DN	0.763314	0.981463	0.0774768	-0.250566	-0.836726	31	DNTT SERPINE1 ID3 MYC LAMC1 SFXN3	NO
DANG_MYC_TARGETS_UP	0.0841969	0.379048	0.173748	0.346271	1.27485	120	RPL26 RPS17 RPL9 DBI MIR155HG DPY30 RPL27 YBX3 HSPE1 MGST1 RPS20 NBN TXN CKS2 MYCT1 GNL3 RPL5 CBX3 BCAT1 ODC1 CSTB TFRC SNRPD3 RPL27A PSMB1 IMPA2 RPL22 CEBPZ EXOSC8 IRF9 CTSC CDK4 TOP1 PRDX3 RPS13 PA2G4 LTA4H RCC1 PTMA SLC39A6 NPM1 RPL32 PPID PINK1 RPL3 E2F3 NAP1L1 HSPA8 NRAS SRSF1 ID2 BAX LDHA RPL10	NO
DANG_REGULATED_BY_MYC_DN	0.0341176	0.260823	0.266351	0.336485	1.32405	206	TCN2 GAS1 RSAD2 IFIT1 NPRL3 TMEM126A ADM FZD1 ERRFI1 ACSL1 SLC4A1 AQP1 SERPINB1 CXCL10 PRLR CASP1 F2R PDGFRA DDIT3 LYZ PLS3 FAS SNCA PMAIP1 PMP22 DUSP6 GM2A SLC11A1 SUMO1 NPC2 IL1RAP ZFP36L1 PLAUR KIF14 RRM2B VAMP3 DUSP1 CTSB KLF4 FTH1 IER3 FTL SYNJ1 DLEU2 CD48 RAB2A CSTB GBP2 PDGFB RPS12 CTBS CASP3 EDN1 GAA IGF2R TIMP2 PLD1 MYL12A CDKN2B GLT8D1 SP3 LAMP2 CAST CDKN1A RABIF RARA FOSL2 PEA15 CHP1 R…	NO
DANG_REGULATED_BY_MYC_UP	0.825342	1	0.0810802	-0.21515	-0.830447	60	UBE2C SERPINE1 SMN1 TBL3 SHMT1 SRM SREBF1 THRA SNRNP70 TCF3 UAP1 TIMM23B TRAF2 CLPB TDP1 ZNF532 RUVBL2 TP53	NO
DARWICHE_PAPILLOMA_PROGRESSION_RISK	0.176642	0.552122	0.123257	0.378412	1.22056	49	DOCK4 LAG3 CHCHD5 LGALS2 MXI1 STOM HGD TRPC6 CXCL16 TNFRSF12A CD33 TMOD1 KPNB1	NO
DARWICHE_PAPILLOMA_RISK_HIGH_DN	0.820382	0.999623	0.0339724	0.224194	0.838589	129	BCL2A1 CHCHD5 GNAO1 LGALS2 TMEM144 CA3 LYZ NBN SCN1B BEST1 ARMC9 GABARAPL2 TRPC6 CX3CR1 GBA DOK4 RTRAF NPTXR GTF2E2	NO
DARWICHE_PAPILLOMA_RISK_HIGH_UP	0.0668414	0.346411	0.197822	0.366381	1.32778	98	S100A8 SLPI RPL39 CACNA1E S100A9 IL1B CSTA LYPD2 RNASE2 ARG1 TXN BATF3 CHPT1 CXCL16 AXL ICAM1 S100A11	NO
DARWICHE_PAPILLOMA_RISK_LOW_DN	0.954722	1	0.0272372	0.197965	0.72878	121	BCL2A1 CHCHD5 GNAO1 TMEM144 LYZ NBN BEST1 BATF3 CX3CR1 DOK4 CXCL16 RTRAF ICAM1 NPTXR GTF2E2 GADD45GIP1 DNAJC1 BID CALM2 SPP1 C11orf58 AKIRIN2 POLI ACTA2 NIT1 GSTZ1 DENR CSPP1 CHP1 STRAP RAB2B	NO
DARWICHE_PAPILLOMA_RISK_LOW_UP	0.0238427	0.2129	0.352488	0.395003	1.43992	106	S100A8 SLPI RPL39 CACNA1E S100A9 IL1B CSTA LYPD2 LGALS2 CA3 RNASE2 ARG1 SCN1B TXN ARMC9 GABARAPL2 TRPC6 CHPT1 GBA AXL S100A11	NO
DARWICHE_SKIN_TUMOR_PROMOTER_DN	0.528061	0.864901	0.0543434	0.259314	0.969087	130	RPL39 BCL2A1 IL1B CSTA CHCHD5 LGALS2 TMEM144 RNASE2 ARG1 NBN SCN1B TXN BEST1 ARMC9 TRPC6 CX3CR1 DOK4 RTRAF GTF2E2 S100A11	NO
DARWICHE_SKIN_TUMOR_PROMOTER_UP	0.137976	0.486374	0.133555	0.336932	1.2202	97	S100A8 SLPI CACNA1E S100A9 LYPD2 GNAO1 CA3 LYZ GABARAPL2 BATF3 CHPT1 GBA CXCL16 AXL ICAM1 NPTXR	NO
DARWICHE_SQUAMOUS_CELL_CARCINOMA_DN	0.846952	1	0.0333093	0.222185	0.818245	122	BCL2A1 CHCHD5 GNAO1 LGALS2 TMEM144 CA3 NBN SCN1B ARMC9 GABARAPL2 TRPC6 BATF3 CX3CR1 GBA DOK4 RTRAF NPTXR GTF2E2	NO
DARWICHE_SQUAMOUS_CELL_CARCINOMA_UP	0.069281	0.352422	0.193813	0.3607	1.31362	105	S100A8 SLPI RPL39 CACNA1E S100A9 IL1B CSTA LYPD2 RNASE2 ARG1 LYZ TXN BEST1 CHPT1 CXCL16 AXL ICAM1 S100A11	NO
DASU_IL6_SIGNALING_SCAR_UP	0.119318	0.452569	0.21925	-0.397131	-1.27633	28	MOXD1 DNM1 IRS1 AGRN PLEC SREBF1 PKIG CDC25B NT5E	NO
DASU_IL6_SIGNALING_UP	0.335463	0.73995	0.133555	-0.285995	-1.05125	47	SORBS3 DNM1 EMILIN1 VEGFB AGRN PLEC ENG HTRA1 FASN NMB SREBF1 NAGPA LY6E TRIM16 CDC25B PLA2G4C FAM189B KHSRP	NO
DAUER_STAT3_TARGETS_DN	0.0589971	0.32604	0.224966	0.442974	1.40036	45	HERC5 ISG15 PDK4 IFIT1 SAMD9 TLR3 IFITM1 STAT1 DNAJB4 OAS3 DDX60 HSPA6 TNFSF10 SP110	NO
DAUER_STAT3_TARGETS_UP	0.0042238	0.0710407	0.407018	0.587505	1.77062	35	C3 SLC2A14 PLPP3 ADM ATF3 SOCS3 PFKFB3 BCL3 ABCA1 ICAM1 PLIN3 SLC2A3 CTSB UGCG EFNA1 BCL6 CEBPD FEM1C ZFP36	NO
DAVICIONI_MOLECULAR_ARMS_VS_ERMS_DN	0.448187	0.823304	0.0628004	0.272612	1.00366	120	FAM110B P3H3 COLEC12 LPAR1 NUAK1 PLPP3 ARL4A DLC1 SMCO4 PLK2 SLC1A3 IGF2BP2 NBN FBN2 PLBD1 TRIP10 SLC1A5 PMP22 EIF4EBP1 BST2 CYP26B1	NO
DAVICIONI_MOLECULAR_ARMS_VS_ERMS_UP	0.549425	0.879124	0.0477342	0.240473	0.967422	271	SATB2 PEG3 IFT81 ADRA2A NRN1 MXRA7 ISCA1 KCND3 GCA LSP1P4 USP12 ROGDI HPRT1 DISC1 RNF11 CDYL HSBP1 FLVCR2 WASHC3 ARHGAP26 PCMT1 CDC42EP3 AGTPBP1 ZNF91 BMERB1 GYPC OAT FBXL5 MSRB1 RASSF4 SMPDL3A IQCG SH3GLB1 TXNIP ERI2 SEMA5A SOS2 FBXO9 MEGF9 RBM8A MAP1LC3B PAIP1 RBPJ MYB CCP110 KIF1B RGS17 EFHD2 MAPK6 B3GAT1 SHOC2 TBCA MINDY2 ARL3 CTBP2 LPAR2 HMGN4 TOPORS PSME1 SLC30A9 MNAT1 THUMPD1 FGFR2 PITRM1 …	NO
DAVICIONI_PAX_FOXO1_SIGNATURE_IN_ARMS_UP	0.501458	0.850052	0.063079	0.314686	0.982166	42	NEBL MEG3 TCF7L2 TMEFF1 LSP1P4	NO
DAVICIONI_RHABDOMYOSARCOMA_PAX_FOXO1_FUSION_UP	0.390855	0.777721	0.0760837	0.334832	1.05849	45	NEBL MEG3 TCF7L2 TMEFF1 PDGFD NTAN1 PELI1 THEMIS2 FGGY TNFAIP3 VWA5A CD9 RWDD3 OSTF1 ADAM10 GADD45A JAKMIP2 CXCR4 GPM6B TMX4 ARRB1 MMD	NO
DAVICIONI_TARGETS_OF_PAX_FOXO1_FUSIONS_DN	0.778902	0.986894	0.0422468	0.254823	0.804094	43	IGFBP3 GLRX PLK2 TBC1D8 RGS2 KCTD12 MICAL2 PPP1R3D CCL4	NO
DAVICIONI_TARGETS_OF_PAX_FOXO1_FUSIONS_UP	0.470167	0.834866	0.0566484	0.256147	1.0026	194	NEBL CAMK2N1 MEG3 GAS1 MYOF PLSCR1 TCF7L2 STK32B TMEFF1 FZD1 PDGFC LSP1P4 APOBEC3B ARHGAP29 CREG1 FBN2 LDOC1 P3H2 YPEL5 SDC4 RAB32 HEBP1 DUSP1 PLXNC1 WSB2 KLF4 PDGFD NTAN1 GSDME PELI1 THEMIS2 UGP2 FGGY ADAMTS5 PTPRE NCOA4 FMR1 OTULINL MAP1LC3B MSL3 CD58 DPY19L1 TNFAIP3 MME CLMN RAP1B SC5D CTSC MAP3K5 VWA5A CD9 LEPROT CYBRD1 PEA15 HMGCR RWDD3 OSTF1 INHBA ADAM10 GADD45A IRS2	NO
DAVIES_MULTIPLE_MYELOMA_VS_MGUS_DN	0.00690947	0.0993021	0.407018	0.615798	1.72958	26	S100A8 LY96 SAT1 MARCKS VNN2 PPBP SLC7A7 FCER1G GLUL MERTK NPC2 TLR1 LITAF	NO
DAWSON_METHYLATED_IN_LYMPHOMA_TCL1	0.767442	0.981898	0.0461379	0.28294	0.790734	25	FOXC1 GAS1 TSHZ3 ISM1 AJAP1	NO
DAZARD_RESPONSE_TO_UV_NHEK_DN	1	1	0.120433	-0.142067	-0.677896	278	USP6 BCAR3 E2F5 CCNB2 CCNE1 NPAS2 AHDC1 RAPGEF5 IRS1 EFNB2 TP63 MTCL1 CENPF WEE1 MKI67 PLK4 PPRC1 MYC KIF11 ABL1 ZHX2 BCL7A TTC9 ADORA2B ZNF318 AUTS2 SMAD7 MDC1 PIP4K2B ZCCHC14 ENOSF1 DOCK9 NPIPB5 ARID5B TAF5L KANK1 ASXL1	NO
DAZARD_RESPONSE_TO_UV_NHEK_UP	0.00491044	0.0796101	0.407018	0.393423	1.49975	160	RPL34 RPL36A FOXC1 RPS17 GEM S100A9 COX7A2 UQCRB MYL6 RPL31 ADM ATF3 NDUFA1 TACSTD2 PHLDA1 RPL30 CCNA1 GADD45B KYNU PPBP TXN PMAIP1 ATP5ME PRDM1 EIF1B CXCL1 SNRPE DUSP1 COX7C JUNB PTGS2 ODC1 IER3 PPIF SEC61G CHRNB1 FOS CLTB ZFP36 TNFAIP3	NO
DAZARD_RESPONSE_TO_UV_SCC_DN	0.955439	1	0.0278699	0.197761	0.720908	106	SIAH2 CDYL FOXO3 NGDN WSB1 THBD MORC3 PHC2 AURKA DDX3Y TNFRSF1A TNFAIP3 RBPJ AMD1 CASP8 SHOC2 MCL1 MARK3 CHD1 SACS EXT1 SIAH1 HMGCR BAZ2B KBTBD2 BAG5 AGO2 E2F3 ANKRD46 SLK TLK2 RYBP RAPGEF2 DDIT4 NAV3 YTHDF3 ZNF146 TNFAIP8 TLK1 SOX4 ADSL NOP16 DYRK1A SLC25A44 FZD2 COIL	NO
DAZARD_RESPONSE_TO_UV_SCC_UP	0.0036102	0.0654409	0.431708	0.436071	1.57216	96	RIDA IL1B ANXA3 PLSCR1 B2M ATF3 DYNC2LI1 TACSTD2 DYNLT3 KYNU AP1S2 HPRT1 TWF1 MIR22HG PMAIP1 SCARB2 RCN2 SLC11A1 SNX3 RALB CXCL1 IL13RA1 TNF UBE2D3 PTGS2 TSC22D3 CCNC RTN4 FOS HSD17B8 IGFBP7 CDKN1C SH3BGRL TMED7 PTGES3 UQCRC2 PRKAR1A UBE2E1 SC5D LAMP2 KYAT3 SCFD1	NO
DAZARD_UV_RESPONSE_CLUSTER_G1	0.00189842	0.0412855	0.45506	0.53982	1.75452	50	RPL34 RPL36A RPS17 COX7A2 UQCRB MYL6 RPL31 NDUFA1 RPL30 PPBP TXN ATP5ME SNRPE COX7C SEC61G CHRNB1	NO
DAZARD_UV_RESPONSE_CLUSTER_G2	0.603252	0.909996	0.059476	0.341491	0.898816	19	ATF3 TACSTD2 PMAIP1 JUNB IER3	NO
DAZARD_UV_RESPONSE_CLUSTER_G6	0.987212	1	0.0248494	0.181699	0.67945	132	DOCK4 POLE2 FAT1 NAA20 CDYL FOXO3 LARP7 BIRC2 MTUS1 IGF2BP3 QKI RNF13 KIF14 AJAP1 BAZ1A MEGF9 MICAL2 CEBPD RBPJ CASP8 SHOC2 SP3 CTBP2 SUCO PUDP	NO
DEBIASI_APOPTOSIS_BY_REOVIRUS_INFECTION_DN	0.00104945	0.026285	0.45506	-0.311321	-1.45461	239	GLDC PLTP GAMT CCNE1 FDXR WFS1 LAMA5 PFAS TMEM63A TCF7 FSCN1 KHK CAD AGRN ITPR3 INTS1 BCL11A PTK7 NCDN PLEC IFT27 SBF1 MKI67 NUP210 SHMT1 ARHGEF17 PDIA4 TSPOAP1 ITPKB MYC ADD2 MYOM2 PCYT2 SV2A SARM1 SLC37A4 ESYT1 ITPR1 PPARD ADCY3 DHCR7 PODXL GGA2 ABCA2 MEN1 THRA DBN1 TRIM16 POLG GTF2I RBM14 ABCC10 TCF3 GPLD1 MGAT5 ENPP2 NISCH ITGB5 KANK1 SLC29A1 TBCD LIG1 MAPRE2 SEC16A SUOX SKIV2L KDM5C MAP4 OCE…	NO
DEBIASI_APOPTOSIS_BY_REOVIRUS_INFECTION_UP	0.000136485	0.00572833	0.518848	0.395797	1.5903	266	PFDN4 GEM RAD51AP1 ISG15 RSAD2 PLSCR1 SNAPC1 ADM ATF3 DTNA CCNE2 CAPZA2 ISG20 ANXA1 UBE2L6 GEMIN2 NMI CXCL10 IFI44L COPS2 IFITM1 DDIT3 MOB4 STAT1 IFIT5 PSMB9 PMAIP1 ZNF254 DUSP3 BST2 CREB5 UBE2D1 SOCS6 IFI16 CEBPB DCTN6 TIMM17A BACH1 SYF2 CPEB3 TAP1 SLC2A3 CXCL1 POLR3F PPM1A DUSP1 ZEB2 CD55 RAB5A COX6A1 CDC27 UGCG STX3 BCL6 ZNF184 CLK1 ATF6 BNIP1 CASP3 IFRD1 UBA3 NEK7 ZFP36 TNFAIP3 THAP12 CCP110 …	YES
DELACROIX_RARG_BOUND_MEF	0.0991301	0.410631	0.287805	-0.237068	-1.12568	275	NEK2 ANKRD24 CCN2 ARHGEF19 LIPE HPDL UBE2C CLNK NR1D1 NUDT6 DMPK PITPNM2 BLNK NBL1 DNM1 INF2 LTBP3 CCND1 FBLN2 OLFML2A CYB5RL LOXL2 SHPK PLEKHB1 FSCN1 SPTBN1 DMWD RPL3L CACNB1 TRAF3IP2 AEBP1 RHOBTB2 PLA2G6 ALS2CL DPP9 TRMT61A RAB30 ABCB8 RRP1 RFX1 SUN2 SCAF1 METRN POLR3H WNT10B LAMC1 TSPAN9 PRX ARSA JRK SPATA33 HOOK2 CLPP NVL	NO
DELACROIX_RAR_BOUND_ES	0.034891	0.263802	0.321776	-0.24652	-1.19648	339	MDK ENAH MGAT3 NEK2 CCN2 LIPE LRRC61 ZFP57 LSR CXCR3 KANK3 FOXP4 COL4A1 B3GNT7 MOK SALL2 CCDC102A NBL1 TCL1A BCAT2 GLI1 CCND1 CYB5RL EVA1B SPRY2 AP5S1 ZNF280B TRIM7 PLEKHB1 HOXB4 VAT1 WEE1 CRELD1 RAI1 LEFTY1 AQP3 ZC3H3 PHC1 ABCB8 SLC35F2 PDLIM1 TRIM28 PPDPF PPP5C PLXDC1 PRAG1 ADGRG5 MAFA GPA33 RITA1 OAS2 ITPR1 ZFP64 GABBR1 SLC12A7 MTHFD1 TSPAN9 SDK1	NO
DELACROIX_RAR_TARGETS_DN	0.504902	0.850897	0.0897105	-0.34388	-0.968326	16	UBE2C CLNK CCND1	NO
DELACROIX_RAR_TARGETS_UP	0.387574	0.776345	0.117766	-0.309905	-1.02723	30	CCN2 LIPE BLNK PLEKHB1	NO
DELASERNA_MYOD_TARGETS_DN	0.0797637	0.373355	0.191892	0.42951	1.35374	44	MS4A4A POLE2 FZD1 MGST1 DDIT3 IFITM2 BASP1 RAB24 S1PR3 THBD EMILIN2 STARD4 GBP2 PTEN TGFBI DPYSL2 KLF6 PLP2 GAPT ARL14EP ATP6V0C	NO
DELASERNA_MYOD_TARGETS_UP	0.608575	0.91319	0.0515309	0.268965	0.915575	63	LGALS4 IGF2 PRSS23 MYL4 DYSF FCER1G CPEB3 SVBP FAM214B KLF5 FAM241A TFRC BCL6 CHRNB1	NO
DELLA_RESPONSE_TO_TSA_AND_BUTYRATE	0.547804	0.877949	0.0880945	-0.319819	-0.932615	19	CDC20	NO
DELPUECH_FOXO3_TARGETS_DN	0.0778419	0.369133	0.287805	-0.440932	-1.46154	30	NEK2 UBE2C ZWINT EFNB2 CENPF MKI67 PCK2 PYCR1	NO
DELPUECH_FOXO3_TARGETS_UP	0.000400189	0.0130546	0.498493	0.564338	1.86301	54	SAT1 MXI1 SEMA3C S100P TNFRSF21 DUSP6 GM2A MXD1 PLAUR CD59 CTSB KLF5 SMPDL3A CD55 SPAG1 EDN1 TIMP2 C11orf58 SLC31A2 HPGD MVP UBE2H WDR45 PDZK1IP1 MAP3K5 CD9 HSPA1L RERE GSN CDC42EP2 IGF1R DAPK1 PIK3CA SERPINB8 KIF3C TGFA CCNG2 TNFAIP8	NO
DELYS_THYROID_CANCER_DN	0.0201594	0.192777	0.352488	0.381066	1.43426	145	FGF13 HBB SEMA3D SH3BGR RAP1GAP LPAR1 HBA1 SGCD GAS1 DNASE1L3 AKR1C1 NRN1 ARHGEF28 ARL4A GNG11 P2RY14 WASF3 EPB41L3 IGF2 LIMK2 HGD ZNF302 ASGR1 MT1E FGL2 LMO2 DNAJB4 CA4 CD36 STARD13 TFPI LTF ASPH PLA2G7 SLC14A1 NUP62CL TGFBR3	NO
DELYS_THYROID_CANCER_UP	2.44901e-05	0.00139525	0.57561	0.397068	1.61648	327	TNFAIP6 COL10A1 INHBB SLPI S100B C3 BCL2A1 MSR1 P4HA2 IL1RN CAMK2N1 C1QB IGFBP3 COL13A1 SPOCK1 LPL DSC2 C4A HP LGALS3 ADM C3AR1 MYO6 LCN2 C1QA ANXA1 VCAN KLHDC8A MBOAT2 TACSTD2 MS4A6A PRSS23 IFI30 FCGR2A CCR1 IGF2BP2 FAS CKLF SCN1B G0S2 STAT1 SERPINA1 CKS2 FLVCR2 MNDA PTPRG MRC1 ABCC6 TLR2 TNFSF15 PMAIP1 SLIT1 SLC1A5 TNFRSF21 PROS1 LYN CX3CR1 CYP1B1 RCN2 DUSP6 MTUS1 ATP1B3 IGSF6 GGCT NPC2 SDC4 CA…	NO
DEMAGALHAES_AGING_UP	0.0038567	0.0672429	0.431708	0.533116	1.68029	44	C3 C1QB HBA1 ANXA3 C4A B2M LGALS3 C1QA MGST1 FCGR2A LYZ ANXA5 S100A6 NPC2 GNS CTSS LITAF GBP2 TXNIP	NO
DEN_INTERACT_WITH_LCA5	0.920437	1	0.0380842	0.238118	0.668799	26	RANBP9 HSPA1L DYNLL1 NPM1 NAP1L1 HSPA8 YWHAZ YWHAQ YWHAB SET YWHAE C1QBP YWHAH HSPA1A CSNK2A1 DYNLL2	NO
DER_IFN_ALPHA_RESPONSE_UP	0.00123031	0.0298001	0.45506	0.514422	1.77498	68	ISG15 PLSCR1 B2M IFIT1 NMI IFI30 IFITM1 FAS STAT1 SRP9 BAG1 PSMB9 PMAIP1 BST2 IFI16 TAP1 ADAR SP110 PLOD2 CASP8 PSMB8 IRF2 TRIM21 IRF9 GMPR PSME1 BTG1 ATP6V0B RHOC SKP1 PPP3CA CD164 SDCBP	NO
DER_IFN_BETA_RESPONSE_UP	0.00289567	0.0559134	0.431708	0.458438	1.66024	97	MAP1B ISG15 PLSCR1 B2M IFIT1 NMI IFI30 IFITM1 STAT1 IFIT5 SRP9 BAG1 PSMB9 PMAIP1 BST2 IFI16 TAP1 PLAUR ETS2 ADAR SP110 ADAM9 PLOD2 IQGAP1 CEBPD CASP8 GMFB PSMB8 IRF2 TRIM21 IRF9 HIF1A PSME1 BTG1 ATP6V0B RHOC SKP1 PPP3CA CD164	NO
DER_IFN_GAMMA_RESPONSE_UP	0.00331775	0.0615609	0.431708	0.498201	1.6914	64	ISG15 PLSCR1 B2M NMI IFI30 IFITM1 FAS STAT1 SRP9 BAG1 PSMB9 PMAIP1 BST2 IFI16 ICAM1 TAP1 ADAR SP110 PLOD2 CEBPD IL15RA CASP8 PSMB8 TRIM21 IRF9 PSME1 BTG1 ATP6V0B RHOC SKP1 PPP3CA SDCBP	NO
DEURIG_T_CELL_PROLYMPHOCYTIC_LEUKEMIA_DN	2.59379e-07	3.17936e-05	0.674963	0.431848	1.75394	306	LAIR2 CLEC2B GZMA KLRF1 HAT1 LPAR6 CACNA2D2 NAP1L2 KLRB1 CST7 CHN1 GNG11 GZMH HOPX AKR1C3 IDI1 CD3D CASP1 F2R ZCCHC2 SRGN IFITM1 SLC25A37 TBK1 PPBP FAS DAPP1 EVI2B GTF2B PMAIP1 GPR65 BCAS2 GZMB TRAFD1 MTUS1 DYNLT1 PTPRM RAP2C PRDM1 HSPA14 USP16 CD52 SLC16A6 CASP4 OPTN ANKRD49 HNRNPH3 CTSL CD59 WSB2 TGFBR3 DUSP12 KLHL2 ZNF14 CD160 IL18R1 TNFSF10 CD48 APMAP GBP2 MT1X CEP57 IFNG ANKRD12 RCBTB2 GNAI3…	NO
DEURIG_T_CELL_PROLYMPHOCYTIC_LEUKEMIA_UP	0.0896458	0.392868	0.287805	-0.240401	-1.14712	278	MYO1B JCHAIN CCNB2 ITM2C FCGBP GNA11 PKD1 SCRIB TCL1A BPHL TRIP13 MEST INF2 METTL1 ELL3 KRT18 IRS1 PFAS HKDC1 PDE7B TP63 SOX12 GSTM1 DMWD CAD KAT2A AK5 MCM2 TRAF3IP2 CRELD1 NCDN DDX11 GCAT MKI67 PIEZO1 PDIA5 ZC3H3 CPSF1 MAD1L1 TAF4B BTNL3 ARHGEF1 TPD52 MCM4 BCL7A HCFC1 MCM7 GALNT6 PML SLC7A8 IPO4 PEX6 GIT1 PCLAF ZDHHC11 SLC7A6 WDR62 PARM1 POLD2 CEP112 ENPP2 PPP2R5D SPON1 BOP1 HGH1 CD40 SLC5A5 FAR…	NO
DE_YY1_TARGETS_DN	0.00365872	0.0654409	0.431708	0.469381	1.65792	80	FGF13 LPAR1 NRP1 CAPZA2 ANXA1 FAS PTP4A1 EPAS1 SNX3 DNTTIP2 USP16 GSPT1 EGF RAB6A CSNK1G3 CDC27 RBBP8 PTEN PKN2 RGS17 ITGAV GNA13 HIF1A RASSF3 IFT57 APC CASP8AP2 SMNDC1 GDI2 EPS8 INHBA CUL5 CCNL1 AGGF1 DST ERBIN	NO
DIAZ_CHRONIC_MEYLOGENOUS_LEUKEMIA_DN	1.00823e-08	1.56858e-06	0.74774	0.593372	2.16305	106	RPS24 S100A8 HERC5 RPL39 RPS17 LPL S100A9 MAFB MS4A4A MYOF RPL41 CSTA CST7 LILRB4 ISG20 CRHBP FCGR1A EPB41L3 LILRB3 RPL30 MS4A6A SLC1A3 GADD45B IFI30 CLEC4A VAMP5 MNDA ANXA5 FGL2 TLR2 ME1 CLEC5A LY86 ADAP2 RPS11 IL13RA1 LHFPL6 KLF4 GSDME GLIPR1 ACSL4 EEF1A1 ELANE BCL6 RPS12 PTPRE CCR2	NO
DING_LUNG_CANCER_EXPRESSION_BY_COPY_NUMBER	0.00873136	0.117764	0.38073	0.426405	1.54378	99	PNPT1 GEMIN2 LSM1 RFC4 SIAH2 ZNF302 MRPL47 MRPS28 CMAS NEK3 PPM1A RB1CC1 PRKCI PPP4R2 BAG4 DCAF13 TBCA NDUFB5 FAM91A1 CDK8 CEBPG THUMPD1 ARMC8 ATP11B RAB20 PDCD6 GTF3A TXNL1 GABPA PPP1R12A FIG4 BRMS1L CDC42SE2 DBR1 PIK3CA E2F3 SEC23IP PAK2 ANKRD46 MAP3K1 FBXO33 NAPG MFN1 SNAP29 PAN3 MTMR6 EIF3H NIPBL FBXW11 GZF1 FXR1 DNAJC2 SENP2 MRPS11 URI1 RYK GOLGA7 ASH2L AKAP9	NO
DING_LUNG_CANCER_MUTATED_SIGNIFICANTLY	0.988215	1	0.0383206	0.181961	0.460749	16	PDGFRA APC INHBA KRAS CDKN2A NRAS NF1	NO
DIRMEIER_LMP1_RESPONSE_EARLY	0.0826211	0.375719	0.184706	0.402767	1.32977	56	BCL2A1 GADD45B SIAH2 CD69 SERPINF2 ICAM1 JUNB TNF NFKBIZ FTH1 RPS10 EEF1A1 ZFP36 TNFAIP3 CCL4 NFKBIA KLF6 INSIG1 MCL1 RPS9 EIF1 HMGCS1 NFKBIE LCP1	YES
DIRMEIER_LMP1_RESPONSE_LATE_DN	0.14	0.489879	0.144631	0.45339	1.30154	28	COL11A2 ISG15 IFITM1 PSMB9 ASAH1 RPS11 TXNIP PSAP	NO
DIRMEIER_LMP1_RESPONSE_LATE_UP	0.498575	0.849538	0.062249	0.295202	0.971648	53	MARCKS NBN PLEK TRIP10 LYN BATF MTHFD2 IRF5 LITAF RHOG CFLAR CD58 SLC20A1 TNFRSF1B BZW1	NO
DITTMER_PTHLH_TARGETS_DN	0.482419	0.841296	0.0632191	0.293903	0.990983	62	NDUFB3 SEMA3A FAT1 FBXO7 CASP1 NDUFS4 UBAP2 ARPC2 RGS10 SP110 MT1X SPTLC2 MAPK6	NO
DITTMER_PTHLH_TARGETS_UP	0.0428571	0.286304	0.248911	0.377963	1.37656	102	ATP5PF PLPP3 CAPZA2 ANXA1 MARCKS PDGFC RBX1 FAT1 TBC1D8 PRSS23 RFC4 CKS2 ANXA5 NUDT4 TIMM17A USP15 AP1S1 MSRB1 FLOT1 RAB6A HSD17B11 VAMP8 GNAI3 PAIP1 USP1 RANBP9 POLI BSG NPTN POLD3 LSM5 POLR3C ARF4 RAB8A	NO
DOANE_BREAST_CANCER_CLASSES_DN	0.0267874	0.226684	0.352488	0.563657	1.54767	24	FOXC1 DSC2 WWTR1 DEK PMAIP1 PLAUR PYGL PLOD2 SPP1 TIMP2	NO
DOANE_BREAST_CANCER_CLASSES_UP	0.382698	0.772483	0.0768737	0.340787	1.05914	41	CRISP3 PRLR HGD KCNMA1 ABCC6 NFIA BMERB1 REEP5 MPHOSPH6 ALDH4A1 CCNDBP1 FAM174B	NO
DOANE_BREAST_CANCER_ESR1_DN	0.00272142	0.0533081	0.431708	0.727216	1.8323	15	S100A8 SLPI KRT5 FOXC1 DSC2 IGF2BP3	NO
DOANE_BREAST_CANCER_ESR1_UP	0.392908	0.780148	0.0738053	0.315342	1.0535	59	C4A STK32B MYO6 ANXA9 TNNT1 SEMA3C EPS8L1 TTC39A C1orf21 NAT1 SLC16A6 SELENBP1 TMC5 UGCG SEMA3B MYB CFD	NO
DOANE_RESPONSE_TO_ANDROGEN_DN	0.74881	0.973813	0.0350901	0.22242	0.873181	197	FAM110B IGFBP3 ARG2 GNG10 TPT1 PLSCR1 CCNE2 GASK1B MARCKS ANXA9 APOBEC3B SEMA3C STOM IFI30 IFITM1 CDYL TMEM123 PTP4A1 PALLD DUSP6 ZNF93 EPB41L4A WSB1 DTX3 ASPH MPP1 QKI FBXW7 RTN1 RGS10 SP110 KIAA0319L PLOD2 TRIM23 BRIP1 EDN1 ZDHHC13 ATP5F1D FYB1 RBMS1 PYCARD PLCB1 E2F8 PSMB8 ZNF322 TMEM106C SLC25A14 PELI2 CDKN1A STS CDC42 PRKCD CYBRD1 ATXN1	NO
DOANE_RESPONSE_TO_ANDROGEN_UP	0.372624	0.767086	0.0707899	0.279527	1.04795	137	BCAM IL1B MAFB BBOF1 LGALS3 RUNDC3A SMIM27 STK3 GADD45B S100P EPHB1 CAMP AKAP5 FAR2 ARHGAP26 GM2A ELOA-AS1 ZNF350 AFF1 TMC5 BNC2 FKBP5 ELMO2 NBPF14 JRKL MICAL2	NO
DORN_ADENOVIRUS_INFECTION_12HR_DN	0.682353	0.944437	0.0831291	-0.268471	-0.873648	29	COL7A1 CCND1 BACE2 MYC ELF3 CD83	NO
DORN_ADENOVIRUS_INFECTION_12HR_UP	0.319865	0.72546	0.0943564	0.442516	1.12051	16	IFIT1 PLK2 KLRC2 JUNB TSC22D3 PDE2A	NO
DORN_ADENOVIRUS_INFECTION_24HR_DN	0.804185	0.995901	0.0423318	0.259653	0.769067	32	PLK2 TNFRSF12A KLRC2 JUNB IER3 EFNA1 NFKBIA MCL1 TXNRD1 MAP2K3 NFE2L2 RAB1A SDCBP	YES
DORN_ADENOVIRUS_INFECTION_32HR_DN	0.680723	0.944427	0.0502948	0.289734	0.8425	30	PLK2 TNFRSF12A KLRC2 JUNB IER3 EFNA1 NFKBIA MCL1 TXNRD1 MAP2K3 NFE2L2 RAB1A SDCBP	YES
DORN_ADENOVIRUS_INFECTION_48HR_DN	0.555891	0.881175	0.0598603	0.321778	0.931651	29	PLK2 TNFRSF12A KLRC2 JUNB IER3 CCNK EFNA1 NFKBIA MCL1 TXNRD1 MAP2K3 NFE2L2 RAB1A SDCBP	YES
DORSAM_HOXA9_TARGETS_DN	0.126506	0.466188	0.151149	0.444579	1.30165	31	GLRX IGF2 CD36 LYN WSB1 SDC4 OSBPL8 JUNB TSC22D3	NO
DORSAM_HOXA9_TARGETS_UP	0.0486946	0.301971	0.321776	0.501642	1.4951	33	GNG10 RAB31 PCMT1 ARPC5 ETS2 CDK7 RPL27A SERINC1 MYB ARL3 RAP1B ST13 HMGN2 GTPBP1 RNF103	NO
DORSEY_GAB2_TARGETS	0.595361	0.905862	0.0833634	-0.306693	-0.910405	20	HSD17B1 SERPINE1 COL6A3 ITGA2B	NO
DOUGLAS_BMI1_TARGETS_DN	0.322361	0.727651	0.0725352	0.264034	1.06635	289	PLSCR4 SEMA3A BPGM IFIT1 CLIC2 SOX6 RPIA TMEM144 STAT1 DCAF12 TBCEL PSMB9 BIRC2 DUSP3 BST2 RBM47 CALCRL OAS3 TIGD1 CPEB4 TMEM179B MFSD1 RAP2C IL1RAP ICAM1 OSBPL8 PCMTD1 EGF OPTN FGD6 NFKBIZ RAB8B ARL6IP1 ACSS3 ACSL4 LIPH JKAMP FGGY CEP57 RPS12 PANK1 GOLT1B GNAI3 B4GALT6 TSPAN31 TNFAIP3 RRAGC SERINC1 CCZ1 IFT46 CASP8 MAPK6 TPP1 SLC39A8 PPCS CYB5D2 SESN3 INSIG1 ITGA1 PUDP SP100 MVP ACTA2 IRF9 NIT1 …	YES
DOUGLAS_BMI1_TARGETS_UP	0.671642	0.941695	0.2114	-0.195947	-0.962751	436	TUBB2B SDC1 CACNB3 DSP RECQL4 PEG10 PLTP WDR90 GPRC5B CACHD1 COL4A1 SLCO4A1 NDN OBSCN NPAS2 CLCN2 LOXL2 IL11RA CCDC180 ANAPC15 SH3PXD2A DCHS1 PLXNA3 PAWR P2RX5 MYBBP1A MRM1 CDKN3 GPR162 RHOBTB2 ISOC2 ADA CHD3 CD320 KIF20A PGAM5 CDH24 MPRIP FASN FAM83D PDE1B SCARB1 CDON SLC41A1 ADARB1 FAM110A KIF11 XYLT2 TBC1D16 CHEK1 SREBF1 SAMD1 SARM1 MAP3K21 SLC37A4 B4GALNT3 ZFYVE9 PODXL TMEM184B EML3 ABCA2 CLP…	NO
DUAN_PRDM5_TARGETS	0.069719	0.352929	0.287805	-0.3765	-1.41005	49	ADARB2 SIK1 PAX5 EBF1 COL19A1 ZFPM1 PHC1 MYC EVL MYOM2 WNT10B	NO
DUNNE_TARGETS_OF_AML1_MTG8_FUSION_UP	0.115274	0.444958	0.155242	0.399006	1.29685	50	S100A8 CST7 LIN7A GCA RNASE2 SRGN LYZ RNASE3 SAMSN1 CD302 BPI HSPA6 CSF3R NFE2 SLA IGFBP7 MS4A3 LST1	NO
DURAND_STROMA_NS_UP	0.864052	1	0.0327242	0.218438	0.799886	112	OLR1 LPAR6 F2R WDR31 PRRG4 ZNF503 PTPRG ARHGAP26 CREB5 DUSP6 RBM47 S1PR3 PRKAG2 TMEM170B AIG1 KLF4 EXOC6 SLFN12 MAP3K6 GLIPR1 SASH1 CHN2 HAVCR2	NO
DURAND_STROMA_S_UP	0.000642101	0.0186856	0.477271	0.406246	1.57528	185	RPS6KA6 FAM20A RORB EFNA5 FAM110B PRRG1 LPL CEP170B LPAR1 PRUNE2 PDK4 LRP11 IL18RAP ARHGEF28 HCN2 IL15 FZD1 MARCKS GNAO1 UBE2L6 IFIT1B GLRX ALPL SLC27A3 SERPINB1 SLC1A3 PDGFRA SCN1B STAT1 IL1R1 LONRF3 EDA ZNF618 TSPAN6 C3orf33 PMP22 LGALSL EIF4E3 CYP26B1 CALCRL ZC2HC1A ADAM12 IFI27L2 IL13RA1 CTSH RB1CC1 THSD7A PLXNA2 TSC22D3 MAP9 CTSO SPP1 AGO4 NUDT14 MTSS2 CDKN1C SLC39A8 CDKN2B FYB1 TGFBI PLAGL1…	NO
DURCHDEWALD_SKIN_CARCINOGENESIS_DN	0.574941	0.89232	0.0465084	0.242852	0.961684	221	SLPI NRG1 RAP1GAP HBA2 HBA1 DOCK1 YOD1 LGALS3BP MAP3K20 STX11 CCDC65 STK3 PHLDA1 PLK2 SEMA3C FMN1 TWF1 CASTOR2 PMAIP1 CSRNP1 GM2A GBA MXD1 CPEB4 RALB ADAM12 QKI HIPK3 CRYBG3 PTGS2 CCDC88A ODC1 UGCG PTPN12 FOS ASAP1 LIN9 KIF1B MAPK6 TPP1 PLD1 PDE6B TGFBI RANBP9 KLF6 ARAP2 CAST BTBD10 TMX3 RIPK1 SNN NFE2L2 HMGCS1 UBE2Q2 LXN DDX3X EPS8 GIT2 PTBP3 IRS2	NO
DURCHDEWALD_SKIN_CARCINOGENESIS_UP	0.836182	1	0.0383206	0.236193	0.779809	56	P3H3 MAOA NFIL3 MGST1 LGALS4	NO
DUTERTRE_ESTRADIOL_RESPONSE_24HR_DN	0.0111087	0.135444	0.38073	0.322391	1.33494	418	PGM5 FAM110B CAMK2N1 IGFBP3 RTL5 ACHE ABCG2 NUAK1 ANXA3 CDC42BPA IFIT1 MAOA NTN4 MYO6 ERRFI1 MARCKS MBOAT2 TACSTD2 PLK2 SHISA2 ADGRV1 SERPINB1 BCAS1 KYNU LRRC1 NAMPT ADGRG6 FAM171B DDIT3 SCN1B IFIT5 WWTR1 BASP1 SLC35A1 KAT2B IL1R1 ZNF354A LHFPL2 FBN2 EPAS1 PALLD TAX1BP1 CSRNP1 ME1 TNFRSF21 ABCA1 TFPI IFNGR1 ZNF117 S1PR3 BCAP29 CPEB4 LYSMD3 PNRC1 YPEL5 DDX60 RNF144B ZDHHC17 LPCAT2 ZFP36L1 XRN1 QKI…	YES
DUTERTRE_ESTRADIOL_RESPONSE_24HR_UP	0.00111771	0.027737	0.45506	-0.299985	-1.42956	270	SPC24 KIF2C BIRC5 RECQL4 RRM2 UBE2C DEPDC1B PLK1 ZWINT CEP55 CCNB2 CDCA2 CDC45 GINS1 TRIP13 KIFC1 DEPTOR TMEM120B BUB1 DEGS2 RAD51 CDCA7L GGH XRCC3 TIMELESS GTSE1 CDC6 PTTG1 INCENP IGFBP4 C21orf58 EXO1 KCNK5 MCM2 POLD1 UHRF1 FAM111B CD320 FAM83D MKI67 PLK4 PAQR4 ESCO2 AMZ1 CCNA2 MCM10 GINS2 KIF11 CHEK1 NCAPD3 CDCA5 KIF4A MCM4 MTHFD1 MCM7 EXOSC5 C1QTNF6 TONSL SMC2 CENPU TFAP4 PCLAF SPDL1 WDR62 NUP…	NO
DUTERTRE_ESTRADIOL_RESPONSE_6HR_DN	0.189227	0.570305	0.114751	0.342131	1.18686	71	FGF13 NUAK1 KYNU FAM171B KAT2B IL1R1 EPAS1 TMTC2 TFPI S1PR3 RNF144B ZNF704 HSD17B11 LIPH ZNF467 EFNA1 ACAA2 MME PLIN2 CRISPLD2 RCAN1 SESN3	NO
DUTERTRE_ESTRADIOL_RESPONSE_6HR_UP	0.217877	0.608741	0.227987	-0.240872	-1.09889	186	SLC47A1 SDK2 TPBG CDC45 LONRF2 DEPTOR TMEM120B FAM102A WDR4 XRCC3 CDC6 MYBBP1A IGFBP4 EXO1 KCNK5 MCM2 SMOX UHRF1 NT5DC3 BCS1L MTHFD1L SEC14L2 SCARB1 AMZ1 MCM10 FLNB GINS2 NAB2 MYC CHEK1 MCM4 MCM7 EXOSC5 C1QTNF6 CENPU TFAP4 SEH1L PPAN FKBP4 AKAP1 ECE2 NR2C2AP NOP2 SLC29A1 RUVBL1 NOL6	NO
DUTTA_APOPTOSIS_VIA_NFKB	0.102719	0.419965	0.169571	0.460217	1.33248	29	BCL2A1 GADD45B FAS TNFRSF21 BIRC2 TNFRSF10C TNF TNFSF10 IER3 CFLAR TNFAIP3 CASP8	NO
EBAUER_MYOGENIC_TARGETS_OF_PAX3_FOXO1_FUSION	0.164157	0.530977	0.130777	0.433911	1.26175	30	NEBL MYO10 SGCD CXCL10 MYL4 MRAS ITGB1BP2 MYL6B	NO
EBAUER_TARGETS_OF_PAX3_FOXO1_FUSION_DN	0.862538	1	0.0395979	0.239312	0.721238	35	ADRA2A DISC1 ARHGAP26 BMERB1 RASSF4 IQCG ZFYVE16 LPAR2 VWA5A FGFR2 ADAM10 JAKMIP2 UBXN4 SGMS1 ARRB1	NO
EBAUER_TARGETS_OF_PAX3_FOXO1_FUSION_UP	0.0194509	0.189816	0.352488	0.380342	1.41031	125	NEBL MYO10 ACHE HBA1 SGCD ISG15 XRCC4 GNAO1 ACSL1 EPB41L3 SERPINB1 CXCL10 GADD45B MYL4 MRAS WWTR1 EPS8L1 MIR22HG ARMC9 PLEK RGS2 CD36 C1R AK1 CALCRL QKI ITGB1BP2 RASSF4 MYL6B TXNIP RBM8A ACAA2 FAM131B FYB1 TNNI2 LAT2 CCR5 ATF7IP2 TNFAIP2 KLF6 ACTA2 KLF1 FOSL2 ALDH1A2 TNS1 FAM13A PDLIM5 EHBP1L1	NO
EGUCHI_CELL_CYCLE_RB1_TARGETS	0.145503	0.498866	0.190023	-0.415422	-1.28229	23	NEK2 BUB1 MCM2 KIF20A CCNA2 KIF11 MCM4 MCM7 CDCA8 SMC2	NO
EHLERS_ANEUPLOIDY_UP	0.119335	0.452569	0.156312	0.432889	1.30464	35	RPL9 FKBP3 HAUS4 PDGFD EEF1A1 PTEN CCP110 CAST CGRRF1 BCL2L2 RHOC PTPRN2 ALDH3A2 CLK4 ERMAP SPART FBXO33 NEK1 ID2 SCAF11 MBNL1	NO
EINAV_INTERFERON_SIGNATURE_IN_CANCER	0.0260352	0.22203	0.352488	0.565069	1.5871	26	ISG15 ERG IFIT1 UBE2L6 IFI44L IFI30 STAT1 BST2 MORC3 ADAR SP110	NO
ELLWOOD_MYC_TARGETS_DN	0.618497	0.916059	0.0875697	-0.256451	-0.896158	36	NKX3-1 BGLAP NME3	NO
ELVIDGE_HIF1A_AND_HIF2A_TARGETS_DN	0.0776567	0.368885	0.186433	0.373447	1.31541	78	P4HA2 IGFBP3 SPOCK1 DSC2 ADM BNIP3L GLRX MXI1 PFKFB3 WSB1 PLAUR RNASE4 PDGFB HK2 FOS RBPJ PLIN2 EGLN1 DPYSL2 AK4 ZNF654 STBD1 ATXN1 S100A4 FAM13A RRAGD ZNF292 DST PGK1	NO
ELVIDGE_HIF1A_AND_HIF2A_TARGETS_UP	1	1	0.0320704	0.13857	0.423534	38	GYG1 STX3 OSTM1 SPAG1 CHUK AREL1 RPP25 TAF9B GCH1 IDH3A SLC25A44 RPP40 RRP12	NO
ELVIDGE_HIF1A_TARGETS_DN	0.081044	0.373476	0.183024	0.388529	1.33084	66	P4HA2 IGFBP3 DSC2 ADM BNIP3L ISG20 GLRX MXI1 PFKFB3 WSB1 RNASE4 PDGFB HK2 FOS RBPJ PLIN2 EGLN1 AK4 STBD1 ATXN1 S100A4 FAM13A RRAGD ZNF292 PGK1	NO
ELVIDGE_HIF1A_TARGETS_UP	0.990318	1	0.0287861	0.173551	0.590779	63	GDPD3 JAK2 DNAJA1 GYG1 STX3 OSTM1 SPAG1 AMD1 TMEM33 CHUK AREL1 KPNA1 HHEX RPP25 SCYL2 TAF9B SEC23IP GCH1 IDH3A SLCO3A1 PSEN2	NO
ELVIDGE_HYPOXIA_BY_DMOG_DN	0.518395	0.860298	0.10673	-0.255003	-0.955292	52	SOBP ACOT7 ESR1 PYCR3 ATP2A3 SRM SLC24A3 DOLK ZGPAT SLC29A1 WDR77 URB2 PSME3	NO
ELVIDGE_HYPOXIA_BY_DMOG_UP	0.111111	0.436566	0.15017	0.340833	1.24126	105	P4HA2 IGFBP3 SPOCK1 DSC2 SAT1 ADM ATF3 DTNA BNIP3L ISG20 NFIL3 TMEFF1 GLRX MXI1 PFKFB3 S100A6 WSB1 ASPH PLAUR CD59 RNASE4	NO
ELVIDGE_HYPOXIA_DN	1	1	0.0232958	0.171763	0.644563	138	SORT1 GDPD3 ZWILCH CENPN JAK2 DNAJA1 GAS2L1 GYG1 RNF14 ODC1 STX3 PPIF ELMO2 OSTM1 SPAG1 NDUFS6 KIAA0930 AMD1 TIMM23 GNA13 ALDH4A1 TMEM50B NETO2 TMEM33 SUMO3 DDX3X CA2 CHUK EEF1E1 AREL1 KPNA1 HHEX RPP25 ZMPSTE24 NUP98 MAPK1 TIGAR ARPC4 SCYL2 TAF9B SEC23IP	NO
ELVIDGE_HYPOXIA_UP	0.0792839	0.371883	0.17822	0.33867	1.26643	132	P4HA2 IGFBP3 SPOCK1 DSC2 SAT1 ADM ATF3 DTNA BNIP3L ISG20 NFIL3 TMEFF1 GLRX MXI1 GADD45B PFKFB3 S100A6 CYP1B1 WSB1 ASPH PLAUR DUSP1 CD59 ADGRE2 RNASE4 TXNIP PDGFB HK2 FOS RBPJ PLIN2 SORL1 EGLN1 TGFBI RLF DPYSL2 KLF6 AK4 ZNF654 DAAM1 STBD1 ATXN1 S100A4 FAM13A RRAGD FAM216A ZNF292 CSGALNACT1 DST PGK1	NO
ENGELMANN_CANCER_PROGENITORS_DN	0.330925	0.735894	0.0838361	0.350094	1.10472	43	SLX1B MAFB AKR1C1 AKR1C3 GADD45B BNIPL S100P	NO
ENGELMANN_CANCER_PROGENITORS_UP	0.0474074	0.297538	0.252961	0.462961	1.42516	39	IGFBP3 GEM ABCG2 ANXA9 FAT1 BASP1 PMP22 TFPI THBD CD55 LACTB ELOVL5 ARID4B MAP3K8 CTSZ NFE2L2	NO
ENK_UV_RESPONSE_EPIDERMIS_DN	0.13612	0.483004	0.119888	0.277243	1.14894	435	NEBL AK6 IGFBP3 CLEC2B DBI HBA1 RPL31 LGALS3 ADM ATF3 STX11 ISG20 MYO6 ANXA1 PDGFC ANXA9 ACSL1 GLRX ARHGAP29 PRSS23 NAMPT F2R ARG1 B4GALT5 TBK1 PFKFB3 PSMB9 IL1R2 DNAJB4 BCL3 ASAH1 FAM8A1 PROS1 PMP22 PTPRA DUSP6 MXD1 C1orf21 DNTTIP2 GAS6 ADAP2 ITPRID2 THBD PNRC1 NDUFS4 GSPT1 PLAUR HEBP1 TUBA1A RAB4B MGST3 TGFBR3 ELF4 CTSH KATNA1 NOD2 GALC RTN3 PELI1 PTGS2 CD55 ODC1 RAB5A PLXNA2 TFRC UGCG DNAJC1 G…	NO
ENK_UV_RESPONSE_EPIDERMIS_UP	0.589803	0.901365	0.0448645	0.239199	0.955154	242	S100A8 NRG1 RAP1GAP DSC2 DNASE1L3 ANXA3 PLSCR1 MAP3K20 ITGAE F12 TREX1 SERPINB1 HPSE TMEM165 G0S2 SERPINA1 S100P RAB31 CEACAM3 BCL3 CD36 SLC1A5 ME1 EIF4EBP1 HMGB1 NUDT4 ADAP2 RALB PIN4 CMAS MTMR11 CXCR2 CTSL CTSB FTH1 SP110 CSTB PYGL ZYX HK2 MRPS7	NO
ENK_UV_RESPONSE_KERATINOCYTE_DN	0.0515575	0.307823	0.204295	0.293206	1.21592	446	PFDN4 MYO10 NRG1 PRRG1 RBFOX2 PLSCR1 IFIT1 MAOA RPA3 BNIP3L SNRPG VRK1 HSPE1 STK3 FAT1 GCSH SEMA3C NMI CNN3 IFI44L COPS2 CTNNAL1 MKRN1 NBN FOXO3 WWTR1 SLC35A1 DEK RGS2 TCEAL1 DNAJA1 GAS2L1 BIRC2 PCMT1 ATP1B3 RP2 SUMO1 MRPL3 IGF2BP3 PPIG WASF1 ERH CBX3 NIPSNAP2 RNF13 TMX1 AFF1 SLC2A3 PICALM UBE2D3 CYP51A1 PRKCI GSDME AFAP1 RBBP8 ITSN1 FKBP5 EID1 BCL6 IFNGR2 STXBP3 SSB RCBTB2 TSNAX RBM8A DDX3Y TOR1…	NO
ENK_UV_RESPONSE_KERATINOCYTE_UP	0.0535906	0.313384	0.199915	0.294649	1.21944	424	S100A12 PFDN5 MMP14 FOXC1 CACNA1E GEM ISG15 IL1B B2M BPGM SNAPC1 ADM ATF3 STX11 ISG20 TACSTD2 KCND3 TNNT1 CCNA1 GADD45B KYNU IFI30 RPL35 CASP1 YBX1 PPBP IL1R2 GABARAPL2 GTF2B DRAP1 C1R DNAJA1 GALNT3 POLB TAF7 MXD1 CEBPB TIMM17A SDC4 BLVRB IRF5 RNF24 BTF3 PLIN3 EIF1B S100A11 RPS11 ETS2 CXCL1 DUSP1 JUNB KLF5 RAB9A UBE2D3 VAMP8 RPS10 ODC1 RAB5A IER3 COX6A1 GRN ELOB TXN2 PPIF EFNA1 CDK5 CHRNB1 PTPRE …	NO
EPPERT_CE_HSC_LSC	0.251506	0.65741	0.10208	0.397527	1.18479	33	PLSCR4 ERG CRHBP TCEAL9 ADGRG6 TFPI FRMD4B	NO
EPPERT_HSC_R	0.254545	0.660956	0.0925529	0.306071	1.11452	103	PLSCR4 TPT1 ERG RPL31 HOPX CFH CRHBP TCEAL9 ADGRG6 TFPI DUSP6 MCTP1 TMEM107 FRMD4B KLF4 ATP8B4 ST3GAL6 C2orf69	NO
EPPERT_LSC_R	0.262048	0.666182	0.148262	-0.321696	-1.12752	38	LRRC61 EEF1AKMT3 TRAF3IP2 PAQR6 SLC9A7 PTCD2 ZBTB39 PLCH1	NO
EPPERT_PROGENITOR	0.552296	0.880105	0.0522693	0.256659	0.959164	130	CNRIP1 DNAJC6 FECH POLE2 DLC1 SPTA1 FBXO7 LHFPL2 PMP22 HMGB1 WASF1 MTHFD2 RHAG ODC1 TFRC CDK7 XK MICAL2 EIF2AK1 PLIN2 HAUS6 NDC80 PCTP TAL1 TXNRD1 SSX2IP SLF1 STEAP3 ARMC8 HSP90AA1 METAP2	NO
FAELT_B_CLL_WITH_VH3_21_DN	0.0613139	0.332675	0.21925	0.426857	1.37682	49	COX7A2 MXI1 MKRN1 RAB31 CALCOCO2 ASAH1 NPC2 RNF13 SERP1 FCGR2B HMGN4 PLP2 MICB PSMD10 CTNNA1 N4BP2L1 LMO4 CCNG2 TBL1X TAB2 TSPO WASHC2C HEBP2 YWHAB DDX1 RABGAP1L PBX3 SNW1	NO
FAELT_B_CLL_WITH_VH3_21_UP	0.0171863	0.177828	0.352488	-0.444225	-1.57771	39	PPT2 PPP5C SLC25A42 ARHGEF1 UBTF TOP3B CDK16 HMGA1 SLC7A6 BCR PRRC2A KDM5C EIF4G1 DVL1 PRKCSH KCNAB2 CLUH PTPN1 SMG5	NO
FAELT_B_CLL_WITH_VH_REARRANGEMENTS_DN	0.364964	0.762632	0.0791317	0.330635	1.06645	49	ATP6V1G1 DEFA1 FKBP1B MRPL40 LDOC1 ADTRP LYRM1 EID1 SLC35D2 KRT10 GLO1 GTF3A TRAPPC8 PARP4 SOD1 SELENOF TMX4	NO
FAELT_B_CLL_WITH_VH_REARRANGEMENTS_UP	0.0899855	0.393659	0.17822	0.41618	1.33687	47	CAPZA2 MXI1 RAB31 FGL2 JAK2 NPC2 TLR1 TUBA1A RAB6A CDKN2D BCL6 PLAGL1 HLA-F NPTN NCF4 RHOC FOXO4 N4BP2L1	NO
FALVELLA_SMOKERS_WITH_LUNG_CANCER	0.240741	0.643832	0.101351	0.351659	1.16103	56	NEAT1 ITLN1 NAMPT EPAS1 RNF144B B3GNT5 DUSP1 UFM1 FKBP5 IQGAP1 RAB12 PGS1 RCAN1 MCL1 EIF1 TOP1 DDX3X ACTR2 CTNNA1	NO
FARDIN_HYPOXIA_11	0.063253	0.337229	0.21925	0.480025	1.39584	30	P4HA2 IGFBP3 BNIP3L MXI1 SLC2A3 PFKFB4 TXNIP EGLN1 AK4 BTG1	NO
FARMER_BREAST_CANCER_APOCRINE_VS_BASAL	0.0309278	0.247974	0.276501	0.329219	1.32035	257	CRISP3 PFDN4 HERC5 FOXC1 DBI APOBEC3A PLSCR1 TCF7L2 MAOA CES1 ACSL1 TMEM158 IDI1 PRLR ATP6V1G1 KYNU HPRT1 ZWILCH HGD IGF2BP2 SNRPD1 KCNMA1 STIL S100A6 ABCC6 ABHD11 PMAIP1 TNFRSF21 LYN CDH1 RBM47 MTUS1 CDC42EP3 BCAP29 BLVRB BMERB1 QKI KIF14 PTK6 EGF OPTN UBE2E3 KLF5 MYL6B HSPA6 CYP51A1 RGS10 NT5C2 PELI1 ACSS3 CCDC88A RBBP8 SPRED2 TSC22D3 NAAA RNF138 SPTLC2 CTBS FMR1 FEM1C DCAF6 REEP5 ELOVL5 MSMO1 …	NO
FARMER_BREAST_CANCER_APOCRINE_VS_LUMINAL	0.0201266	0.192691	0.352488	0.335835	1.34698	258	S100A8 SLPI MYO10 S100A9 STYK1 DBI ORM1 PI3 CACNA2D2 MAOA STK32B ADM ANXA9 CES1 ACSL1 SMARCD3 SMCO4 KYNU NAMPT YBX1 HPRT1 HGD RNF11 KCNMA1 BAG1 ABCC6 PMAIP1 LDOC1 FAR2 EIF4EBP1 BST2 GALNT3 ERGIC2 MTUS1 TESMIN ZDHHC17 MPZL1 RNF24 OPTN RTN1 MYL6B SMPDL3A ADAM9 RESF1 CSTB PPIF RBBP8 SPRED2 FKBP5 CHN2 NAAA KPNB1 ACAA2 ABHD2 SPTLC2 CTBS CHST15 ACADM PGRMC1 REEP5 MSMO1 MANSC1 ACSL3 NBPF10 ARL3 MPHOSPH6…	NO
FARMER_BREAST_CANCER_BASAL_VS_LULMINAL	0.15711	0.518572	0.114751	0.288321	1.15647	256	S100B BCL2A1 FOXC1 MYO10 RAD51AP1 DSC2 PI3 BBOF1 CACNA2D2 ADM NFIL3 YBX3 ANXA9 SMCO4 BLVRA SEMA3C YBX1 IGF2BP2 TMEM123 SNRPD1 STIL PPP1CB TCEAL1 TTC39A LYN NQO1 RBM47 NUDT4 CEBPB SRPK1 MTHFD2 TESMIN SLC49A3 QKI RGS5 NAT1 FBXL5 KIF14 TBC1D12 SLC16A6 KLF5 PDGFD NT5C2 PELI1 RNF43 NFE2L3 UGCG DNAJC1 SPRED2 TSC22D3 ATG5 CCNC AP1AR RNF138 SPTLC2 MAGOH CXCL5 IFRD1 MYB EFCAB11 AMD1 PLIN2 CHMP2A REEP5 CDK…	NO
FARMER_BREAST_CANCER_CLUSTER_1	0.146269	0.49971	0.138805	0.412099	1.25957	38	HERC5 GZMA ISG15 RSAD2 IFIT1 GMFG IFI44L CD3D OAS3 CD48 SH2D1A CCR2 CCR5 GPR171	NO
FARMER_BREAST_CANCER_CLUSTER_2	0.0115619	0.138854	0.38073	-0.504523	-1.68478	31	NEK2 CEP55 CCNB2 BUB1 PTTG1 KIF20A CCNA2 KIF11 KIF4A MCM4	NO
FARMER_BREAST_CANCER_CLUSTER_5	0.569106	0.888816	0.062249	0.35257	0.927977	19	VMP1 RNF43 SUPT4H1 RPS6KB1 TRIM37 DHX40 TACO1 MED13 PPM1D MTMR4	NO
FERNANDEZ_BOUND_BY_MYC	0.35741	0.758219	0.0720033	0.277654	1.04902	147	ACHE FECH PI3 ISG20 HSPE1 PLA2G4A NBN BRCA2 TXN BCL3 RPS6 POLB ICAM1 ASCL2 RBM3 ETS2 EPB42 JUNB CSTB TFRC PTEN RPL27A CHRNB1 CD63 PSMB1 IMPA2 CLNS1A AMD1 CASP8 ACADM RPL22 IRF2 TGFBR1 MCL1 BSG NIT1 HIF1A TCIRG1 RARA APC TOP1 ALDH2 RPL13A ARF4 LBR HMGN2 CLDND1 PTMA ITGB1 MDM2 MYBL2 PPID SRD5A1 DCK ACOX1 HMOX1 HSPA8 UBA52 NRAS ID2 BAX RNASEH2A ATF4 ZNF146 HERPUD1 GSTP1 EIF5A2 ARF1 MAN2A2 FXN EIF4A1…	NO
FERRANDO_HOX11_NEIGHBORS	0.136951	0.484236	0.193813	-0.441745	-1.28816	19	DNTT CD1A ADA CCNA2 MAD1L1 MCM4 MTHFD1 CD1C RPA1 MCM5 UNG STMN1	NO
FERRANDO_TAL1_NEIGHBORS	0.181818	0.559707	0.131458	0.499365	1.26446	16	BCL2A1 LGALS3 FCGR3B CXCR1	NO
FERRANDO_T_ALL_WITH_MLL_ENL_FUSION_DN	0.0504087	0.305016	0.234393	0.3884	1.36808	78	HBB HMGB2 PSMA6 VBP1 LMNB1 HPRT1 PSMA2 TXN HINT1 SLC1A5 GLUL PRDX6 AP3S1 RPS4Y1 FKBP5 KPNB1 ACAA2 ELOC PTP4A2 FYB1 LST1 PPP2R2A	NO
FERRANDO_T_ALL_WITH_MLL_ENL_FUSION_UP	0.399254	0.78561	0.132147	-0.254826	-1.01469	78	DMPK ID3 FAM30A TCF7 SPTBN1 CCR9 AEBP1 SPOCK2 PLEC CHI3L2 MAD1L1 MYOM2 PRKAR1B BIN1 SREBF2	NO
FERRARI_RESPONSE_TO_FENRETINIDE_UP	0.0610561	0.331729	0.234393	0.583772	1.47088	15	NEAT1 ATF3 SEMA3C DDIT3 PTGS2 SLC7A5 NRIP1 IRF1 DDIT4 HERPUD1	NO
FERREIRA_EWINGS_SARCOMA_UNSTABLE_VS_STABLE_DN	0.301075	0.707559	0.151149	-0.267611	-1.06631	74	FGF2 WFS1 DHRS1 SPHK2 GNG7 UBASH3A DOLK TMEM53 DLG5 MXRA8 PRX ALDH6A1 ZNF446 CCDC97 CCR4 SLC27A1 CRY2 INPP5A NAGLU AAK1 NENF ELAC2 GNB5 PGPEP1 IFI35 MAGI2	NO
FERREIRA_EWINGS_SARCOMA_UNSTABLE_VS_STABLE_UP	0.559809	0.883161	0.12564	-0.221373	-0.970638	142	KIF2C PIF1 OR2A4 STX1A SLCO5A1 ZWINT CEP55 INF2 XRCC3 SNRPA1 CDC6 CENPF CDKN3 CENPK RGS1	NO
FEVR_CTNNB1_TARGETS_DN	0.460888	0.831127	0.0519512	0.241981	1.01133	498	RPS24 HBB RPS6KA6 HMGN5 RIDA P2RY6 RAD51AP1 SARNP ATP5PF HBA2 HMGB2 ADRA2A HAT1 HEMGN POLE2 DSCC1 MRPL1 SECTM1 CCNE2 MBNL3 TMEFF1 FZD1 PSMA6 CES1 VBP1 AQP1 SCOC FKBP3 CNN3 PLA2G4A RFC4 IFITM2 BRCA2 SNRPD1 MRPL13 ETAA1 PPP1CB DEK LARP7 KDM1B SCLT1 BCAS2 CENPI POLB HMGB1 TPMT SNRPB2 KIF18A MRPL3 SDC4 ASCL2 ERH EIF2A BTF3 EIF3E HPF1 MRPS22 UBE2E3 TMEM107 RB1CC1 TRIP6 PTEN NOTCH2 SEMA5A SSB SOS2 TAF9…	NO
FIGUEROA_AML_METHYLATION_CLUSTER_1_DN	0.52719	0.864235	0.0623861	0.319277	0.962239	35	RPS18 LHFPL2 NLRC4 NQO2 CD68 MTMR11 MARVELD1 TLR1 SEZ6L CD48	NO
FIGUEROA_AML_METHYLATION_CLUSTER_1_UP	0.296496	0.702387	0.0860347	0.308051	1.09686	90	PRRG1 CCDC96 CLIC2 ISCA1 GNG11 YBX3 CRHBP MYL4 ADGRG6 MCTS1 TLR2 PMAIP1 PCDHGA5 FCRLB ZNF582 SMIM15 CXCL1 CAVIN2 APIP TBC1D31 ZNF766 TEK SORL1	NO
FIGUEROA_AML_METHYLATION_CLUSTER_2_UP	0.61875	0.916059	0.0919686	-0.25063	-0.897863	41	VPREB3 KCNK13 ABLIM1 NRP2 PIGZ MRPL9 ZNF667 SLC39A14 THBS4 EXOSC2	NO
FIGUEROA_AML_METHYLATION_CLUSTER_3_DN	0.632275	0.922752	0.0815265	-0.289857	-0.882817	22	AOC1 NOS3	NO
FIGUEROA_AML_METHYLATION_CLUSTER_3_UP	0.348837	0.752558	0.0751182	0.284841	1.05399	124	PRRG1 BPGM GLIPR1L2 ISCA1 YBX3 CRHBP MYL4 ADGRG6 PCDHGB4 MCTS1 TLR2 PMAIP1 ZNF501 DYNC1LI1 PCDHGA5 ZNF582 CAPS2 SMIM15 BLOC1S1 APIP TBC1D31 KNSTRN PACRGL TEK AMOTL1 TGFBR1 STX18 NIT1 VWA5A CDK8 CHCHD2 FSTL1 PPP2CA PCDHGA8 GUCY1B1 PDHX ZNF281 C3orf38 CYP26C1 DHRS12 ZNF84 PLPBP MATR3 TNFAIP8L2	NO
FIGUEROA_AML_METHYLATION_CLUSTER_4_UP	0.803089	0.995901	0.0891647	-0.205785	-0.841109	89	POU2AF1 VPREB3 LARGE2 BHLHB9 AEBP1 ABLIM1 SPHK2 NRP2 PIGZ PPT2 CNTROB ATP6V1G2 MRPL9 ZFHX2 PTGDR2 ZFP28 ZNF667	NO
FIGUEROA_AML_METHYLATION_CLUSTER_5_DN	0.344774	0.748899	0.0857844	0.390942	1.09803	26	CD3D DEFA1 DYNLT1 CLDND2 MARVELD1 CD48 DEFA3 EFHD2	NO
FIGUEROA_AML_METHYLATION_CLUSTER_6_DN	0.504105	0.850897	0.0686326	0.368962	0.957911	18	TUSC1 CD3D DEFA1 PLEK DEFA3 DNAJC28 CSGALNACT1 AIM2	NO
FIGUEROA_AML_METHYLATION_CLUSTER_6_UP	0.82021	0.999623	0.0353911	0.225809	0.823392	107	CCDC96 BPGM CLIC2 YBX3 CRHBP IRAK3 C19orf33 MYL4 ADGRG6 MCTS1 PMAIP1 DYNC1LI1 ZNF582 OSBPL1A SMIM15	NO
FIGUEROA_AML_METHYLATION_CLUSTER_7_UP	0.889628	1	0.0321428	0.213556	0.767083	94	CCDC96 ISCA1 YBX3 CRHBP MYL4 ADGRG6 TLR2 PMAIP1 DYNC1LI1 ZNF582 MPZL1 OSBPL1A SMIM15	NO
FINAK_BREAST_CANCER_SDPP_SIGNATURE	0.0087825	0.117867	0.38073	0.688888	1.73573	15	GZMA ADRA2A ADM PLEK SNTG2 CD52 CD48 SLC40A1 SPP1	NO
FINETTI_BREAST_CANCERS_KINOME_GRAY	0.0825083	0.375719	0.199915	0.558364	1.40686	15	TWF1 CSNK1G3 CDK17 CHUK SCYL2 NEK4 SLK CSNK1A1 TLK1 DYRK1A HIPK1 TRIM33 SNRK	NO
FINETTI_BREAST_CANCER_KINOME_GREEN	0.456229	0.828483	0.0749279	0.397534	1.00661	16	LYN FGR MLKL HCK	NO
FIRESTEIN_CTNNB1_PATHWAY	0.97479	1	0.0625237	-0.19172	-0.612701	27	PLK1 PLK4 CSNK1E MAP3K14 STK25 DGKH PKN1 MAP2K1 LTK DKC1	NO
FIRESTEIN_PROLIFERATION	0.369427	0.765729	0.0714786	0.279565	1.04695	133	RPS6KA6 CCNB3 STK32B MAP3K20 STK3 MASTL LIMK2 TBK1 MAK AKAP7 PIK3AP1 EPHB1 PPP1R17 MERTK GZMB HCK AXL	NO
FISCHER_DIRECT_P53_TARGETS_META_ANALYSIS	0.403226	0.787672	0.062249	0.25675	1.0286	252	NEFL ATF3 GASK1B FAM210B VCAN BLOC1S2 F5 PLK2 TRIAP1 RIN1 TLR3 FAS PTP4A1 FBN2 VWCE GABARAPL2 PMAIP1 EID2B TET2 PRRG2 USP15 RNF144B SRA1 TMEM63B PSTPIP2 PRDM1 LRP1 TNFRSF10C ZNF564 RRM2B NCEH1 FBXW7 APOBEC3H SNX2 BORCS7 CAVIN2 RNF19B IER3 FBXO22 TRIP6 TXNIP PTEN FCHO2 BCL6 PANK1 PLXNB2 RGL1 SEMA3B CFLAR CPEB2 IGFBP7 NINJ1 IKBIP BTBD10 ACTA2 SOCS4 SLC30A1 MFAP3L CDKN1A ZNF385A BTG1 PADI4 ZNF37A TC…	NO
FISCHER_G1_S_CELL_CYCLE	0.591358	0.901637	0.0476387	0.247287	0.942606	161	PLSCR4 SLC25A27 DNAJC6 POLE2 DSCC1 CCNE2 TCEAL9 CENPQ YEATS4 MASTL TREX1 RFC4 TLR3 GK AKAP5 TLR6 KLRK1 ASPH DNAJC3 SVIP KLF5 TIFA OSGIN2 PTGS2 LIPH RBBP8 TTLL7 BRIP1 MITF RMI1 MYB CDC7 USP1 RNPC3 E2F8 SP1 MAP2K6 RABIF EZH2 TXNRD1 C1GALT1 PANK2 CASP8AP2 BRCA1	NO
FISCHER_G2_M_CELL_CYCLE	0.000356323	0.0119118	0.498493	-0.325724	-1.50966	211	CDC20 MGAT2 KIF2C PIF1 SAPCD2 BIRC5 NEK2 BCAR3 UBE2C DEPDC1B PLK1 E2F5 CEP55 CCNB2 CDCA2 CDCA3 SMTN TRIP13 KIFC1 CCNF KIF18B BUB1 GTSE1 SPA17 ZNF165 PTTG1 CENPF WEE1 KIF20A FAM83D MKI67 PLK4 CNTROB CCNA2 BAG3 PLAU FAM110A SGO1 KIF11 JADE2	NO
FLECHNER_BIOPSY_KIDNEY_TRANSPLANT_OK_VS_DONOR_DN	0.26601	0.6692	0.103958	0.455205	1.18182	18	CADM4 FPR2 GLIPR1 FOS RBMS1	NO
FLECHNER_BIOPSY_KIDNEY_TRANSPLANT_REJECTED_VS_OK_DN	0.140709	0.490873	0.117766	0.275652	1.14336	447	RIDA KL SH3BGR RTL8C ATP5PF FECH AKR1C1 CDC42BPA NDUFA5 MAOA ISCA1 MYO6 HSPE1 AKR1C3 LGALS2 FAT1 KIAA0895 HNMT GCSH EPB41L3 GLRX MXI1 DYNLT3 AQP1 COPS2 F2R HGD UQCRQ PLS3 COX7B SLC7A7 TXN WWTR1 MT1E ABCC6 CA4 KCNJ15 COPS5 DUSP3 ZNF117 CDH1 NQO2 MICU2 HAGH ZNF91 RNF14 SERPINI1 ZDHHC17 LAMTOR5 SETD3 NDUFS4 KIAA1109 OAT ATP5PO SELENBP1 CTSL UBE2E3 CENPS RNASE4 SNX2 PRKCI SMPDL3A COX6A1 RAB2A NDUFAB1…	NO
FLECHNER_BIOPSY_KIDNEY_TRANSPLANT_REJECTED_VS_OK_UP	3.50524e-07	4.05105e-05	0.674963	0.59757	2.12205	84	S100A8 C1QB GZMA AIF1 CSTA GMFG LILRB4 ISG20 LCN2 ACKR1 UBE2L6 FCGR1A CD3D IFI30 IFITM1 STAT1 RAB31 LGALS9 CD14 FCER1G GLUL LY86 LTF FCN1 CD52 TYROBP ADAM15 RGS10 GLIPR1 CD48 AOAH GBP2 ENTPD1 CD163 SLA FCGR3A CFD TNFRSF1B LST1 RBMS1 PSMB8 RAB27A CCL5 HLA-F IL10RB PTPRC	NO
FLECHNER_PBL_KIDNEY_TRANSPLANT_OK_VS_DONOR_DN	0.0062214	0.0925205	0.407018	0.546576	1.68754	40	LY96 IL1B GADD45B ATP6V1G1 MIR22HG ANXA5 LYN CDC42EP3 SLC2A3 UBE2E3 MAPK14 PTPN12 EID1 MKNK1	NO
FLECHNER_PBL_KIDNEY_TRANSPLANT_OK_VS_DONOR_UP	0.0322981	0.254423	0.282013	0.365927	1.38432	148	RPL23 EEF1B2 RPL11 PSMA4 SAT1 RPS20 CLEC11A RPL35 PSMA2 TXN VAMP5 LGALS9 RGS2 RPS29 MYD88 TAF7 NUMB TIMM17A LAMTOR5 TRIM58 MORC3 PLIN3 GSPT1 OAT PPM1A FTH1 TFRC UGCG MICAL2 CUL4B CD58 RBPJ LST1 NDUFB5 PRKAR1A KLF6 LAMP2 STXBP1 STK19 EMG1 MBOAT7 PA2G4 PSMD9 PECAM1 PPP1R15A ITGB1 TMED2 DAP3 AHNAK	NO
FLECHNER_PBL_KIDNEY_TRANSPLANT_REJECTED_VS_OK_DN	0.67344	0.942257	0.049094	0.2702	0.872274	48	RPL11 RIOK3 GTF2B MYD88 GSPT1 COX7C FTH1 MAPK14	NO
FLECHNER_PBL_KIDNEY_TRANSPLANT_REJECTED_VS_OK_UP	0.369902	0.765729	0.0764767	0.317994	1.06987	61	B2M TAX1BP1 LYN DCTN6 UBE2E3 LITAF PTPN12 CDK7 TSC22D3 CDKN1C SHOC2 REEP5 ITPK1 PLP2 TXNRD1	NO
FLORIO_NEOCORTEX_BASAL_RADIAL_GLIA_DN	0.00303177	0.0574403	0.431708	-0.329284	-1.46792	157	HBG1 CDC20 KIF2C BIRC5 NEK2 RRM2 UBE2C DEPDC1B PLK1 ZWINT CCNB2 CDCA2 UGT8 CDC45 CDCA3 GINS1 SERPINE1 KIFC1 KIF18B BUB1 TIMELESS GTSE1 PTTG1 CENPF EPB41L2 CDKN3 WEE1 EXO1 CENPK KIF20A PHGDH SKA1 MKI67 PLK4 ESCO2 SGO1 KIF11 CDCA5 KIF4A	NO
FLORIO_NEOCORTEX_BASAL_RADIAL_GLIA_UP	0.0633971	0.337229	0.193813	0.327319	1.27914	192	NEBL L1TD1 CCDC168 LGSN CXXC4 SGCD NRP1 APOBEC3A RSAD2 TMEM236 ARHGEF28 PPARGC1A GLIPR1L2 ISG20 S100Z TBC1D8B TDRD1 TLR3 CLEC12A LYZ WDR31 BNIPL PRRG4 GBP6 WWTR1 STIL AHSP ZNF492 MARVELD2 MEFV KCNJ15 PPP1R17 TPRG1 CENPI SULT1B1 ADTRP DMC1 ACVR1C PLB1 RHAG TRIM58 RGS5 NAT1 DOCK5 SLC14A1 SCIMP FAM241A SASH1 TNFSF10 CPNE8 BLOC1S6 BNC2	NO
FLOTHO_PEDIATRIC_ALL_THERAPY_RESPONSE_DN	0.542902	0.874567	0.0625237	0.337292	0.947349	26	LMNB1 FBN2 DDX60 TNFSF13 MRGBP TRIM21 ESPL1 SNN CASP8AP2 MRPL28 TTLL4 JAKMIP2	NO
FLOTHO_PEDIATRIC_ALL_THERAPY_RESPONSE_UP	0.000576012	0.0173759	0.477271	0.575334	1.85572	49	RPL17 RPL7 RSL24D1 CLEC2B TPT1 RPL27 MXRA7 KLF10 RPS20 CD69 RPS6 RPL5 CDC42EP3 VAMP3	NO
FONTAINE_FOLLICULAR_THYROID_ADENOMA_DN	0.0407681	0.278795	0.321776	0.452716	1.49695	57	S100A12 IGSF10 LPAR1 LILRB3 IFI30 COX7B S100A6 KLRK1 CASP4 KLF4 SPI1 TMEM14B GLRX2 SENP6	NO
FONTAINE_FOLLICULAR_THYROID_ADENOMA_UP	0.19708	0.579143	0.191892	-0.294462	-1.15105	66	SLC29A2 E2F5 FCGBP CCNE1 KIF18B IL11RA EPHB6 CABIN1 FBXW8 PDLIM1 PRKG1 ZNF512B PPARD SWI5 HDAC9 GALT EIF4G1 PBXIP1 SEMA4B ARMCX4 TAOK2 FBXL16 GLG1 ZNF76	NO
FONTAINE_PAPILLARY_THYROID_CARCINOMA_DN	0.52822	0.864901	0.0602484	0.296548	0.966396	51	IGSF10 C16orf86 F5 LILRB3 ROGDI ASGR1 TSPAN5 CD33 SPI1 KLRD1 ME3 LMLN MFAP3L KLF1 TRIP12 CBL KLHL9 ZNF44 SPEF2	NO
FONTAINE_PAPILLARY_THYROID_CARCINOMA_UP	0.162162	0.527574	0.127505	0.375804	1.23533	52	SLPI SPACA6 LGALS3BP SNRPG IGF2BP2 S100A6 CA11 KLF4 SENP6 CD63 PLXNB2 SPP1	NO
FONTAINE_THYROID_TUMOR_UNCERTAIN_MALIGNANCY_DN	0.0506914	0.305139	0.321776	0.589198	1.55773	20	SLPI IGSF10 LILRB3 ROGDI	NO
FONTAINE_THYROID_TUMOR_UNCERTAIN_MALIGNANCY_UP	0.814199	0.997858	0.0422468	0.264558	0.76598	29	SNRPG IGF2BP2 CA11 CD63 TESC BCL2L11 OAZ2 ZMYM5 CTNNA1	NO
FORTSCHEGGER_PHF8_TARGETS_UP	0.469555	0.834866	0.0558265	0.253858	1.00527	221	STOX2 RIDA IL20RB HMGB2 AKR1C1 BBOF1 PDK4 DPCD NFYB RPIA KRCC1 PDGFC ZNF267 FZD5 PTP4A1 DNAJB4 TFPI NQO1 NQO2 MTHFD2 GRAMD1B SLC2A3 SLC16A6 HINT3 FBXW7 ARL6IP1 ZNF721 SERP1 IQCG RNLS TXNIP GKAP1 EFNA1 CDC37L1 KPNB1 RELL1 TBC1D31 OTULINL BID DCBLD1 LIN9 SEC62 CALML4 VTI1B BNIP2 JPT1 PUDP NKAPD1 BCL2L11 CTSC KDM7A MAT2B TSPAN13 SLF1 STEAP3 CDC26	NO
FOSTER_KDM1A_TARGETS_DN	0.101067	0.41652	0.287805	-0.264056	-1.18147	168	DIRAS1 RAPGEF3 CDC20 CC2D2A NOS3 OTUB2 WDR90 ZNF579 GNA11 LTBP3 IL11RA NME3 GCAT CIZ1 ATP2A3 IRF2BP1 TMEM186 FAM110A LRFN3 BAIAP2 METRN TNRC6C SCLY CUL7 ENO3 CRIP2 ITGA3 MZT2A RBKS ELMO3 TGM1 PHYKPL NISCH NT5E NAA80 BLCAP GTPBP2 DDX27 KRBA1 HAGHL CELSR3	NO
FOSTER_KDM1A_TARGETS_UP	0.141361	0.49206	0.131458	0.332564	1.21971	114	LPL POF1B LPAR1 LGALS3BP AQP9 RNF182 UBE2L6 KIAA0895 TNNT1 GCA ITGAE BCAS1 CD3D MYL4 IFITM2 BEST1 SNCA BBS7 RBM47 RBMS2 TSPAN2 TMEM40 IFI27L2 SASH1 LIPH ITSN1 XK FAM3B PTPN22 TNNI2 MANSC1 DDR2 QPCT GMPR CDKN1A BRCC3 HTATIP2 VWA5A MYCL IDH1 TAF1D TMEM62 MGST2 RRAGD HSH2D HECW2	NO
FOSTER_TOLERANT_MACROPHAGE_DN	6.66067e-05	0.00316969	0.538434	0.375685	1.53935	356	MYO10 IL4I1 LPAR1 OLR1 IL1B ARL4A FRMD4A RIN2 SECTM1 NFIL3 HOPX IL15 FZD1 ERRFI1 VCAN GCA CNN3 PLA2G4A USP12 FZD5 SOCS3 NAMPT ADGRG6 F2R CTNNAL1 B4GALT5 TLR3 PFKFB3 FAS GBP6 GK SNX10 MNDA CD69 JAK2 BCL3 TRIP10 CSRNP1 TMTC2 ARHGAP26 CREB5 ZUP1 MXD1 MTUS1 GNB4 MITD1 TET2 LNPK ADAP2 CMTM6 TNFRSF12A RAP2C SDC4 DLL1 XRN1 GSPT1 KIAA1109 PLAUR AFF1 GYPC SGK3 IL13RA1 ETV6 JUNB PHC2 SLFN12 NFKBIZ FAM241A …	YES
FOSTER_TOLERANT_MACROPHAGE_UP	7.39621e-05	0.00345869	0.538434	0.486709	1.79241	122	CCL8 MSR1 IL1RN GEM ORM1 MS4A4A RIOK3 CST7 HP ISG20 LCN2 TENT5C ACSL1 FPR2 GLRX IRAK3 MS4A6A SLC25A37 FPR1 STAT1 PRDX5 FGL2 PIK3AP1 BST2 TANK OAS3 IGSF6 RNF149 ZC3H12C MTHFD2 CLEC4E BST1 CCDC71L SLFN12 DNAJC1 AOAH AGTRAP RGL1 TRIM23 IFRD1 SLC16A3 TNFRSF1B SLC31A2 TGFBI MCOLN2 IFT57 TXNRD1 DCBLD2 RNASET2 RAB20 RAB10 PSMD10 ZFAND3 ZDHHC2 ADHFE1 SLC7A11 SLC31A1 ITGAL	NO
FOURNIER_ACINAR_DEVELOPMENT_EARLY_UP	0.461794	0.831127	0.0736213	0.386967	0.993041	17	BNIP3L LEPR FKBP1B PID1 CEP57 FOSL2 ZNF277 GSN SRD5A1	NO
FOURNIER_ACINAR_DEVELOPMENT_LATE_2	0.069461	0.352646	0.287805	-0.245818	-1.15398	265	KIF2C BIRC5 RRM2 CDCP1 BCAR3 PLK1 ZWINT CDC25A CDC45 CDCA3 SMTN GINS1 TRIP13 CCNF SPRY2 XRCC3 TIMELESS SNRPA1 TTLL12 CDC6 PTTG1 CAD CDKN3 MCM2 DDX11 BCS1L HSP90B1 FLNB GINS2 DNAJC9 KIF4A POLRMT MCM4 MTHFD1 MCM7 GCN1 UAP1 NUP85 HJURP FKBP4 ITGB5 DCAF15 NT5E SAMD4A ALG8 DROSHA ACACA LDLR SMPD4 TUBG1 EIF5B ASPM CLPB NOC2L SMARCA4 ILF3 DUSP4 FLNA CDK1 MYH9 CAMSAP2 DVL1 NSD2 MCUR1 PREB MCM3 NUP188 PRK…	NO
FOURNIER_ACINAR_DEVELOPMENT_LATE_DN	0.329897	0.735225	0.119348	-0.3615	-1.0731	20	RRM2 CEP55 TRIP13 CDKN3	NO
FRASOR_RESPONSE_TO_ESTRADIOL_DN	0.0798859	0.373355	0.188204	0.406747	1.34276	54	INHBB RAP1GAP ANXA3 PLK2 BCAS1 KYNU IL1R1 LHFPL2 GNS SELENBP1 CTSL DUSP1 LITAF CTSH IER3 EFNA1	NO
FRASOR_RESPONSE_TO_ESTRADIOL_UP	0.214099	0.603506	0.153159	-0.396141	-1.19698	21	MPPED2 PEG10 OLFML2A CDC6 IGFBP4	NO
FRASOR_RESPONSE_TO_SERM_OR_FULVESTRANT_DN	0.000700251	0.0199473	0.477271	-0.53839	-1.93934	42	CDC20 KIF2C UBE2C TIMELESS CENPF WEE1 MCM2 MAZ CCNA2 MYC KIF11 POLRMT MTHFD1 MCM7 CDC25B POLE CDK1 NFRKB MCM3 CHAF1A MCM5 BLM RRM1 BRPF1 STMN1	NO
FRASOR_RESPONSE_TO_SERM_OR_FULVESTRANT_UP	0.600985	0.907931	0.0601186	0.34683	0.900449	18	RCN2 CD302 PLXNC1 RB1CC1 STXBP3 UFL1 ATP6V1A SRD5A1	NO
FRASOR_TAMOXIFEN_RESPONSE_UP	0.180645	0.557156	0.188204	-0.327438	-1.1764	43	SDC1 CLIC3 EFNB2 RAB30 SUN2 ELF3 GGA2 TM7SF2 LSS SLC25A1	NO
FRIDMAN_IMMORTALIZATION_DN	0.764615	0.981463	0.0459538	0.277756	0.797349	28	IGFBP3 CREG1 CYP1B1 IFI16 IRF5 OPTN CLTB MAP1LC3B IGFBP7 CDKN1A HTATIP2 MAP2K3	NO
FRIDMAN_SENESCENCE_UP	0.244726	0.648912	0.0995791	0.346464	1.16566	61	NRG1 IGFBP3 ISG15 CREG1 STAT1 RAB31 CYP1B1 IFI16 IRF5 S100A11 OPTN CDKN2D IFNG CLTB MAP1LC3B TNFAIP3 IGFBP7 CDKN1C CDKN2B TNFAIP2 CDKN1A EIF2S2 HTATIP2 MAP2K3 PEA15 GUK1	NO
FUJII_YBX1_TARGETS_DN	0.409091	0.793929	0.164406	-0.221186	-0.994766	175	ENAH RRM2 DEPDC1B ZWINT CDC25A TRIP13 CCNF RAD51 XRCC3 TIMELESS SPA17 CDC6 CDKN3 EXO1 MCM2 UHRF1 CENPK PLK4 MCM10 FUT8 GINS2 KIF11 CHEK1 KIF4A MCM4 ITPR1 MCM7 DBN1 CENPU E2F7 ODF2 HNRNPL LIG1 CDT1 ASPM OXCT1 FLNA ANKRD36 NSD2 MSI2 HMGB3 SHCBP1 MCM3 PRKDC TAF15 NOP56 CHAF1A FANCD2 SSRP1 TRIO CDC25C MCM5 BUB1B	NO
FUJII_YBX1_TARGETS_UP	0.232628	0.63091	0.10714	0.417665	1.20927	29	POF1B PDK4 GIMAP2 FAS S100A6 LGALS9 SLC16A3 CCL5 MVP ACTA2 CDKN1A CPNE4 KLF11 PLAAT4 CDC42SE2 SMIM5	NO
FULCHER_INFLAMMATORY_RESPONSE_LECTIN_VS_LPS_DN	3.11521e-16	8.40069e-13	1.0377	0.502673	2.07848	402	HESX1 TNFAIP6 FAM20A HERC5 NEAT1 DSC2 MS4A7 NT5C3A AIF1 MAFB APOBEC3A MS4A4A LPAR6 RSAD2 CALHM6 SLC8A1 IFIT1 SAT1 FRMD4A RIN2 LGALS3BP SECTM1 C3AR1 CCDC152 ISG20 SAMD9 SORT1 LACC1 MARCKS STAB1 CES1 UBE2L6 TLR8 FPR2 FCGR1A HNMT BLVRA APOBEC3B LILRB3 KLF10 FCGR3B STOM SEMA4A MS4A6A NMI CXCL10 SOCS3 TLR4 IFI44L GADD45B NAMPT B4GALT5 PITHD1 LIMK2 IFITM1 FPR1 IFITM2 NBN PFKFB3 FAS DYSF VAMP5 IFIT5 DAP…	NO
FURUKAWA_DUSP6_TARGETS_PCI35_DN	0.151515	0.509036	0.2114	-0.322872	-1.22401	55	KIF2C LAMB3 CEP55 CCNB2 ORC6 PMEPA1 CENPF SIPA1L3 CCNA2 KIF11 MCM4 ADORA2B RTEL1 IVD MAP7 ETS1 HJURP	NO
FURUKAWA_DUSP6_TARGETS_PCI35_UP	0.659913	0.937066	0.0498907	0.271623	0.88517	51	HERC5 SECTM1 AKR1C3 IFI30 IFITM1 PSMB9 CTTNBP2NL EPB41L4A KLRC2 THEMIS2 SLC15A3 ENPP5 TNFSF13B PYCARD KCNMB1 RTP4 BDH2 HLA-F	NO
GABRIELY_MIR21_TARGETS	0.668958	0.940867	0.0385579	0.230366	0.92472	263	OLR1 YOD1 XKR3 TLR4 PALLD ARHGEF12 LNPK RP2 CPEB3 RAPH1 B3GNT5 FBXL5 WWC2 KLF5 PRICKLE2 PELI1 TTC33 SASH1 ZRANB1 TSNAX MEGF9 PPP1R3B NEK7 SNX30 RRAGC LPGAT1 AGO4 PLD1 ACBD5 MINDY2 DDR2 LCORL GOLGA4 RMND5A ALS2 ARID4A RHOBTB3 APC PHF20L1 ATP11B CYBRD1 PKD2 DDX3X ACTR2 SLC17A5 NFIB PTBP3 CLCN5 ZNF292 SLC31A1 SPG11 GNAQ ACAP2 SUZ12 STAT3 SESN1 GPD2 SNX13 BRMS1L TPM1 YTHDC2 UBXN4 FAM102B FAM217B KLHL…	NO
GAJATE_RESPONSE_TO_TRABECTEDIN_DN	0.0984848	0.408396	0.227987	-0.50176	-1.39055	15	CCDC86 TRIM16 UTP20 GMDS LRBA MCM5 CENPX PKP4 DDX10 E2F2 CDK14	NO
GAJATE_RESPONSE_TO_TRABECTEDIN_UP	0.0698006	0.352929	0.202072	0.417671	1.37475	53	ISG15 ATF3 ANXA1 SRGN S100P RGS2 C1R PROS1 CASP4 TUBA1A ARL6IP1 IL18 UGCG TXNIP FOS TNFAIP3 IGFBP7 CFD TGFBI DDR2	NO
GALE_APL_WITH_FLT3_MUTATED_DN	0.896465	1	0.0615707	-0.250049	-0.692971	15	HLA-G	NO
GALE_APL_WITH_FLT3_MUTATED_UP	0.993399	1	0.0696133	-0.155067	-0.598552	58	MYO1B GEMIN4 ABCC1 RITA1 ELF3 LARS2 RFTN1 INPP5F TTK TRMT61B NSUN5 RNF144A RFC3 PMM2 TELO2 NOLC1 CDC16 SOCS2 UPF3A HEATR1 MTMR1	NO
GALINDO_IMMUNE_RESPONSE_TO_ENTEROTOXIN	0.000204197	0.00771505	0.518848	0.541572	1.87468	70	IL1RN IL1B IL18RAP ERRFI1 PHLDA1 GLRX LILRA5 SOCS3 GADD45B BCL3 CD14 SLC11A1 CEBPB PLAUR CSF2RB ETS2 DUSP1 JUNB TNF SLFN12 PTGS2 ODC1 IER3 TXNIP PTPRE TNFAIP3 SPP1 CCL4 NFKBIA TNFAIP2 CCL5 BCL2L11	YES
GALLUZZI_PERMEABILIZE_MITOCHONDRIA	0.354985	0.756802	0.0824344	0.359009	1.08198	35	GZMA BAD PLS3 PMAIP1 GZMB SH3GLB1 CASP3 BID MCL1 BCL2L11 PRKCD CPT2 PPID CFL2	NO
GALLUZZI_PREVENT_MITOCHONDIAL_PERMEABILIZATION	0.572358	0.891142	0.0619763	0.351465	0.925068	19	BAD TXN HK2 MCL1 BCL2L2 BAX TSPO PRKACA VDAC2 VDAC1	NO
GAL_LEUKEMIC_STEM_CELL_DN	0.00342919	0.0633381	0.431708	0.389995	1.52537	193	S100A8 TNFAIP6 S100A12 IL1RN S100A9 IL1B MAFB MS4A4A CSTA LGALS3 SECTM1 C3AR1 LILRB4 NUSAP1 STX11 C1QA VCAN LGALS2 FCGR1A HNMT LILRB1 LILRB3 MS4A6A RNASE2 LMNB1 IFI30 CASP1 FCGR2A SPATA6 HPSE CCR1 FPR1 LYZ FCAR G0S2 SERPINA1 CLC S100P MNDA FGL2 TLR2 GPR65 HCAR3 CD14 CLEC5A CX3CR1 CYP1B1 SLC22A4 FGR GM2A SLC11A1 IGSF6 CDC42EP3 ADAP2 CARD9 FCN1 AP1S1 PRDM1 CD1D CXCL1 SLC16A6 OSGIN2 C12orf29 SLC15A3…	NO
GAL_LEUKEMIC_STEM_CELL_UP	0.841004	1	0.0911073	-0.205189	-0.839191	98	MMP11 COL7A1 SALL2 BPHL CCND1 GP6 VEGFB AGFG2 IRF6 EVPL BCL11A ABLIM1 ALS2CL PPP1R9A BIN1 ZC3H7B HCFC1 TSPAN9 TOP3B INO80B ETS1 HJURP	NO
GARCIA_TARGETS_OF_FLI1_AND_DAX1_DN	0.330189	0.73547	0.166934	-0.236391	-1.04181	143	RRM2 CBX2 HPDL ZWINT CCNE1 CDC25A NDN RIMBP3 INF2 ALG14 PLEKHA7 NEFH SPINDOC CDC6 STRBP UBE2D4 TRMT61A ESCO2 MCM10 GINS2 CHEK1 CDCA5 NAGPA SCLY	NO
GARCIA_TARGETS_OF_FLI1_AND_DAX1_UP	0.725434	0.964221	0.0454968	0.263981	0.83299	43	PJVK MYO6 UBE2L6 PLIN3 KCNMB4 PTGES3 LGALS1 SYNGR1 C5orf15	NO
GARGALOVIC_RESPONSE_TO_OXIDIZED_PHOSPHOLIPIDS_BLACK_UP	0.141566	0.49216	0.142057	0.439286	1.28615	31	ERRFI1 CCDC82 LATS2 OSGIN2 CD55 CLK1 AKIRIN2 PLAGL1 SRC CDKN1A EIF1 ZNF654 NFE2L2 ATP11B TFEC ZNF44 PRNP CDC42EP2	NO
GARGALOVIC_RESPONSE_TO_OXIDIZED_PHOSPHOLIPIDS_BLUE_DN	0.687697	0.947135	0.08654	-0.236137	-0.884369	49	ATOH8 CCNF ZNF462 FAM117B HEATR6 RALGPS2 PTCD2 PATZ1 SUOX NAPEPLD PINX1 HTT NREP	NO
GARGALOVIC_RESPONSE_TO_OXIDIZED_PHOSPHOLIPIDS_BLUE_UP	0.0452781	0.292612	0.24134	0.362292	1.34529	126	ATF3 NFIL3 DDIT3 RAB23 MIR22HG SPIRE1 PMAIP1 DNAJA1 SAMSN1 MXD1 BACH1 CPEB4 ZC3H12C RNF24 PLAUR FGFR1OP2 ZNF468 KLF5 HSPA6 TSC22D3 SRXN1 CASP3 IFRD1 MAP1LC3B PNPLA8 ZNF222 KIF1B ZFAND2A AKIRIN2 VPS37A RCAN1 GNA13 UBALD2 VCPIP1 E2F6 KDM7A OSER1 N4BP2L2 INHBA FRS2 EIF5 RHEBL1 DNAJB6 JMJD6 PCYT1A MTHFD2L KBTBD8 AGO2 C16orf72 SLC3A2	NO
GARGALOVIC_RESPONSE_TO_OXIDIZED_PHOSPHOLIPIDS_CYAN_UP	0.0880399	0.388377	0.193813	0.549474	1.41007	17	USP12 PTP4A1 CSGALNACT2 AKIRIN2 CDK17 GNA13 PSEN1 CREBRF TFE3 ADAM17 ARF6	NO
GARGALOVIC_RESPONSE_TO_OXIDIZED_PHOSPHOLIPIDS_GREEN_DN	0.52381	0.863652	0.0919686	-0.311343	-0.948257	22	NUMA1 EHMT2 ANKRD11 TMEM177 PRICKLE1 PATZ1 CLUAP1	NO
GARGALOVIC_RESPONSE_TO_OXIDIZED_PHOSPHOLIPIDS_GREEN_UP	0.370192	0.765729	0.0833634	0.401923	1.08374	22	GEM IDI1 SOCS3 RAB23 DUSP6 CPEB4 CPNE8	NO
GARGALOVIC_RESPONSE_TO_OXIDIZED_PHOSPHOLIPIDS_GREY_DN	0.238976	0.640807	0.101714	0.355682	1.16918	52	FOXC1 FRMD3 IFIT1 ARL4A STAT1 IFIT5 ZNF503 EVI2B LMO2 B3GNT5 DUSP23 PDGFB KANK2 PLIN2 SESN3 SMIM3 RHOBTB3	NO
GARGALOVIC_RESPONSE_TO_OXIDIZED_PHOSPHOLIPIDS_GREY_UP	0.735974	0.970185	0.0509083	0.317104	0.798978	15	ZSCAN31 FNIP1 TFEC KIAA1522 ADAMTS1 NAV3 HERPUD2 CREBRF	NO
GARGALOVIC_RESPONSE_TO_OXIDIZED_PHOSPHOLIPIDS_MAGENTA_UP	0.0255661	0.220032	0.352488	0.567674	1.59442	26	BPGM LINC00622 PTP4A1 CSRNP1 DNAJA1 LATS2 PTGS2 RIT1 ZSWIM6 KLF6 KIAA0232 FOSL2 ZNF844 FBXO30 PPP1R15A C16orf72 HSPA8 GABARAPL1 BTN2A1	NO
GARGALOVIC_RESPONSE_TO_OXIDIZED_PHOSPHOLIPIDS_PINK_DN	0.0697674	0.352929	0.2114	0.508427	1.4209	25	LPAR6 HECW2-AS1 GIMAP2 LONRF3 LYN CYP26B1 THBD GIMAP7 ZNF704 ZEB2 TNFSF10 TMEM140 GBP2	NO
GARGALOVIC_RESPONSE_TO_OXIDIZED_PHOSPHOLIPIDS_RED_DN	0.979167	1	0.0364549	0.20223	0.550568	23	MAFB TXNIP TRIM34 SPTLC2 RAB11A GIT2 SESN1	NO
GARGALOVIC_RESPONSE_TO_OXIDIZED_PHOSPHOLIPIDS_TURQUOISE_DN	0.133521	0.477956	0.249247	-0.349387	-1.32228	54	SPC24 CDC20 CBX2 PLK1 KIFC1 CCNF TTLL12 FAM111B MKI67 CCNA2 PML XAF1 PRMT7 ENOSF1 EXOSC2 DHRS3	NO
GARGALOVIC_RESPONSE_TO_OXIDIZED_PHOSPHOLIPIDS_TURQUOISE_UP	0.00371377	0.0658931	0.431708	0.490884	1.7113	74	MAP1B NRG1 CLIC2 NECTIN3 KLF10 ZCCHC2 PTP4A1 SPIRE1 MYCT1 DUSP3 MERTK IPMK FAM126B CCDC82 HIPK3 FGFR1OP2 DUSP1 GPCPD1 RIT1 SPOPL ANKRD12 RICTOR CFLAR ZFP36 RRAGC ZBTB34 KLF6 ARRDC3 CNKSR3 FOSL2 ZNF697 SAMD8 PIM3 SLC7A11 FBXO30 DNAJB6 CLDND1 AGO2 PRNP CDC42EP2	NO
GARGALOVIC_RESPONSE_TO_OXIDIZED_PHOSPHOLIPIDS_YELLOW_DN	0.854497	1	0.0661326	-0.24557	-0.758003	23	DENND5B RTL10 GEMIN4 ZNF827 PML PATZ1	NO
GARGALOVIC_RESPONSE_TO_OXIDIZED_PHOSPHOLIPIDS_YELLOW_UP	0.5	0.849611	0.0647943	0.33874	0.985002	30	GK PPP3R1 KLF4 RAB8B KDM7A SGMS2 CHIC2 DIPK2A GCLC C16orf72 HMOX1 NAV3 GCLM TNPO1 XPO1 ATXN7 PHLPP2 MOSMO JOSD1 NPC1 LCOR NUP153 ENTPD7	NO
GARY_CD5_TARGETS_DN	0.845909	1	0.0231538	0.207587	0.860347	419	POLE2 IFIT1 ZCCHC10 MRPL1 ISCA1 CCNE2 SAMD9 SELENOK KLF10 PSMC6 SBDS GAS5 CASP1 TRMT10C TWF1 BASP1 TXNDC9 CYBB DNAJB4 PFDN1 PALLD MRPL36 DNAJA1 KIAA1586 MYBL1 TANK CENPI DYNC1LI1 DNTTIP2 ASNSD1 USP15 PPIG RBM3 HSPA14 USP16 SIGLEC10 TLR1 KIF14 SGK3 WBP4 UFM1 PRELID1 MRPL50 DLEU2 CDC27 TFRC PSMC2 MT1X TXNIP RPF1 SENP6 KPNB1 RBM8A RANBP6 RNF138 FMR1 ATP6V1C1 MED7 AMD1 KRT10 FAR1 FPGT GMFB PAK1IP1 CE…	NO
GARY_CD5_TARGETS_UP	0.942246	1	0.0168381	0.194139	0.805026	436	BCL2A1 NEAT1 CLEC2B EVI2A CYSTM1 RBFOX2 SAT1 RPL31 DYNC2LI1 LILRB4 BNIP3L SMIM27 LEPR GAS5 SLC25A37 MKRN1 STAT1 UBXN6 CD69 MEF2A VMP1 BCL3 PLEK PMAIP1 SLC1A5 DOK3 FGR GM2A MIDN CEBPB NPC2 WSB1 GNS METTL9 ICAM1 ZFP36L1 SLC2A3 CD52 LHFPL6 FLOT1 JUNB RSRC1 TIFA CYP51A1 WDFY1 CD55 TMEM120A GRINA KIAA0319L SPI1 CD48 NADK GKAP1 GPR160 MEGF9 PKN2 AP2A1 CTBS GAA IFRD1 MAP1LC3B METRNL ATP5F1D ALOX5 WBP2 G…	YES
GAURNIER_PSMD4_TARGETS	0.0642336	0.338852	0.213928	0.419897	1.35437	49	CCL8 C3 B2M C3AR1 CXCL10 CCR1 C5AR1 IL1R2 IFNGR1 CXCL16 CXCL1 IL13RA1 TNF IL18R1	NO
GAUSSMANN_MLL_AF4_FUSION_TARGETS_A_DN	0.369014	0.765729	0.0766747	0.320821	1.07523	60	SEMA3D EFNA5 SH3BGR SLC4A10 NTN4 ATF3 SEMA3C LYZ FBXO2 SCARB2	NO
GAUSSMANN_MLL_AF4_FUSION_TARGETS_A_UP	0.289604	0.694448	0.0826646	0.286011	1.0859	151	CNRIP1 NRP1 MAOA DTNA C3AR1 DYNLT3 GK MNDA ZNF22 RGS2 LYN LYSMD2 S1PR3 P3H2 RP2 PLGRKT PRELID2 ST3GAL6 GSDME PLXNA2 ATP6V1B2 ENPP5 ZNF467 SBNO2 RNF138 MOSPD2 SLC20A1 RNF130 RPL15 IGFBP7 B3GAT1 TNFAIP2 TRIM9 ARRDC3 ANKRD50 RTP4 AP1S3 SLC43A3 RPGR SSX2IP APC GLB1L NAP1L3 PITRM1 WAC PDE8A ATP7A SPDYA PFKFB2 CSGALNACT1 MANBA ZNF518A JMJD1C TGM2 YTHDC2 HDAC2 CENPE RMDN1 MATR3 WIPF1	NO
GAUSSMANN_MLL_AF4_FUSION_TARGETS_B_UP	0.45515	0.827989	0.0743625	0.390374	1.00178	17	TCN2 NRXN1 RBM47 ADAM12	NO
GAUSSMANN_MLL_AF4_FUSION_TARGETS_C_UP	0.453704	0.827297	0.138805	-0.228909	-0.987754	131	SDC1 PRPF40B KANK3 TCL1B GPSM1 SPEG ALG14 LYSMD1 TCF7 PLEC TXLNB HSPA1B PDZD2 B3GAT3 PPP1R3F PPP1R13B TMC6 PLAU DNMT3A	NO
GAUSSMANN_MLL_AF4_FUSION_TARGETS_D_UP	0.678973	0.944427	0.0533478	0.306016	0.840248	24	RAB9B F5 GPR153 CD302 PLA2G7 FBXO45 EIF4G3 PDE6B QPCT	NO
GAUSSMANN_MLL_AF4_FUSION_TARGETS_E_DN	0.816176	0.99833	0.0646485	-0.275517	-0.775822	16	GPT2 COL6A3 IGFBP4	NO
GAUSSMANN_MLL_AF4_FUSION_TARGETS_E_UP	0.425107	0.803386	0.0701132	0.311707	1.02902	54	COLEC12 ADM IFIT1B GCA CLEC11A PDGFRA PMAIP1 ABCA1 PLB1 PPIG RNF144B ZC2HC1A IL13RA1 KCTD12 SEMA3B CTBS FOS TGFBI AKIP1 CCL5	NO
GAUSSMANN_MLL_AF4_FUSION_TARGETS_F_DN	0.4375	0.812672	0.0745501	0.379927	1.03434	23	LPL NAP1L2 LHFPL2 CLEC5A TFPI AGAP1 HTATIP2 GADD45A RRAGD GLCE OPN3 GHITM ERO1A	NO
GAUSSMANN_MLL_AF4_FUSION_TARGETS_F_UP	0.114583	0.443319	0.147331	0.338831	1.24423	116	GAS1 ISG15 NUAK1 PLSCR1 LGALS3BP ADAMTSL4 SERPINB1 SLC1A3 ADGRG6 PLXDC2 DYSF GM2A GAS6 TMEM176A PNRC1 EMILIN2 ZFP36L1 PSTPIP2 TLR1 NFKBIZ CTSH ATP8B4 IL18 LRRCC1 PDGFB AFAP1L2 RCBTB2 TTLL7 ZFAND5 CEBPD TEK ENY2 MME TCP11L2 L3HYPDH CLMN CAST PCTP TMEM30A MAP3K8 KDM7A TMEM176B TMEM154 PIBF1	YES
GAUSSMANN_MLL_AF4_FUSION_TARGETS_G_DN	0.727132	0.965452	0.0486034	0.291587	0.8149	25	VCAN ZCCHC2 FAM171B SLC6A8 DUS4L DYRK3 ARL14EP CCDC91 AHNAK SERPINB8 GCH1	NO
GAUSSMANN_MLL_AF4_FUSION_TARGETS_G_UP	0.604762	0.910915	0.119888	-0.217232	-0.950488	140	MPPED2 RAPGEF3 PEG10 RAB38 NDN PRXL2B FOXJ1 P2RX5 MGLL ANG GPR162 CCN3 DAAM2 ARHGEF17 ZBTB42 ABL1 NEGR1 TMEM53 PRKG1 ENKUR MXRA8 C1QTNF6 NSG1 TNFRSF25 ALDH6A1 PRMT7 LYRM9 FBXO32 ARID5B CD40 DOCK10 DHRS3 PTPN3	NO
GAVIN_FOXP3_TARGETS_CLUSTER_P2	0.637131	0.925664	0.0501934	0.26782	0.901063	61	FAM20A MYO6 MBNL3 CTSE SERPINB1 FCGR2A PSTPIP2 IQCC PELI1 PADI2 GAA CHST15 IGFBP7 CCL5 BTG1 CRYBG2 TMEM176B	NO
GAVIN_FOXP3_TARGETS_CLUSTER_P3	0.793451	0.991719	0.0350151	0.22408	0.840887	138	CAMK2N1 EVI2A MS4A4A RIN2 ITGAE SEMA4A AKAP7 S100A6 FGL2 CYBB CCRL2 SAMSN1 PGLYRP1 ARHGEF12 PRDX6 SDC4 IRF5 PRDM1 TGFBR3 SLFN12 IL18R1 IL18 DGAT2 ITSN1 ENTPD1 GPR160 ACOXL CASP3 PDE2A CD244	NO
GAVIN_FOXP3_TARGETS_CLUSTER_P4	0.253028	0.659684	0.0949752	0.317428	1.13016	89	MYO10 NRP1 STX11 MBNL3 NFIL3 HOPX ITGAE SEMA4A ARHGAP29 GADD45B GBP6 IL1R2 EPAS1 PMAIP1 MXD1 SLC22A15 ETFBKMT FRMD4B ATP8B4 ST3GAL6 TWSG1 RILPL2 APOL2 GSTO1 TNFRSF1B	NO
GAVIN_FOXP3_TARGETS_CLUSTER_P6	4.80028e-05	0.00241206	0.557332	-0.47944	-1.90907	78	SPC24 CDC20 KIF2C BIRC5 NEK2 RRM2 PLK1 CHDH CEP55 CCNB2 CDCA3 ZCCHC18 BUB1 RAD51 ACOT7 CENPF CENPK KIF20A FBXW8 CCNA2 MCM10 GINS2 IFI44 CDCA5 CMPK2	NO
GAVIN_FOXP3_TARGETS_CLUSTER_P7	0.590278	0.901365	0.0531298	0.269621	0.939746	75	EVI2A MBNL3 ANXA1 TMEM158 SPECC1 TLR7 MXD1 CYFIP1 FGD6 ST3GAL6 RESF1 GBP2 GLIPR2 DENND5A FOS IGF2R GATA1 KLRD1 QPCT LYST GZMK SNN	NO
GAVIN_FOXP3_TARGETS_CLUSTER_T4	0.078877	0.371645	0.183024	0.363628	1.30025	91	NRP1 PLSCR1 CALHM6 STX11 SELENOK ITGAE SEMA4A P2RX7 IL1R2 HINT1 CYFIP1 ETFBKMT SMPDL3A ODC1 RESF1 CD48 DENND5A APOL2 TIMM10 MTHFS ITGAV SH3BGRL SNX18 PPM1L SC5D RRAGD NRIP1 ITGB1 SYT11 AHNAK IGF1R TNFRSF9 PSMD4 ITGB8 SNX14 LARP1B PLEKHB2 YWHAQ PLAAT3 ARF1 BMPR2 STON1 CAPG BTG2 PSMB3	NO
GAVIN_FOXP3_TARGETS_CLUSTER_T7	0.0522088	0.309655	0.227987	0.38397	1.37431	92	RPS7 MYL6 MARCKS MKRN1 STAT1 SPECC1 JAK2 SAMSN1 PSTPIP2 FTL UGP2 PTP4A2 AMD1 PDRG1 ADGRG3 OAZ1 REEP5 CCT2 CYBA PSMB8 LGALS1 STRN3 CAST BCL2L11 RPS9 CHCHD2 SUPT4H1 STRAP GUK1 GDI2 FAM50A	NO
GAVIN_IL2_RESPONSIVE_FOXP3_TARGETS_UP	0.39	0.777551	0.106323	-0.357277	-1.01858	17	FOXP3 MCM7 TNFRSF4 IL2RB ARMCX4 IL2RA ZNF608	NO
GAVIN_PDE3B_TARGETS	0.320847	0.725839	0.0922597	0.428469	1.13279	20	FGL2 CYBB TFPI GZMB TNFSF10 IL18 ENTPD1 NCF4 NCF1 SYT11 F13A1	NO
GAZDA_DIAMOND_BLACKFAN_ANEMIA_ERYTHROID_DN	0.899891	1	0.0209276	0.202529	0.833952	388	RANBP17 EFNA5 ARG2 SH3BGR ISG15 ANXA3 AIF1 DOCK1 MAOA XRCC4 CST7 ADM LCN2 SMIM27 ZNF32 SLC27A3 TREX1 TBC1D8 RNASE2 PPBP DDIT3 ENPP4 BRCA2 GPR153 ZNF492 RNASE3 TAX1BP1 MYCT1 SRR ZNF117 ZNF93 UGGT2 NQO1 MXD1 SLC11A1 AZI2 ZNF91 ZC2HC1A TSPAN5 CASP4 NT5M CTSB RSRC1 OSGIN2 EFCAB2 KCTD15 PAM16 CDC27 AOAH ELANE PSAP NAGA NOTCH2 ATG5 BLOC1S1 FBXO9	NO
GAZDA_DIAMOND_BLACKFAN_ANEMIA_ERYTHROID_UP	0.622465	0.917591	0.0560596	0.31861	0.894875	26	LEPR LIMK2 FAS NUP62CL ATP6V1B2 DPY19L1	NO
GAZDA_DIAMOND_BLACKFAN_ANEMIA_MYELOID_DN	0.186747	0.566685	0.121543	0.413009	1.23093	33	KLRF1 TAX1BP1 ZNF91 CD59 EID1 CHN2 CHMP4A COX5B MRPL23 RPS14 PRKCD	NO
GAZDA_DIAMOND_BLACKFAN_ANEMIA_MYELOID_UP	0.241692	0.645403	0.104733	0.414006	1.19868	29	ENPP4 CENPN THBD MTMR11 MAP4K5 FOSL2 RAB20 CA2 SRSF1 BAX ARFGEF1 FRY NECAP1 SEC24A CAPN7 CREM HBEGF	NO
GAZDA_DIAMOND_BLACKFAN_ANEMIA_PROGENITOR_DN	0.135211	0.481452	0.140406	0.375089	1.25711	60	PFDN4 NFYB THOC7 GCSH BRCA2 TAX1BP1 HSDL2 ELOC CASP6 SPAST IGFBP7 PLAGL1 LAMP2 IFT74 LSM5 ZNF84 AGBL5 IMPACT NUP54 PDZD8 NAP1L1 IBTK	NO
GAZDA_DIAMOND_BLACKFAN_ANEMIA_PROGENITOR_UP	0.8125	0.997137	0.0427591	0.25472	0.769773	36	NAMPT VNN2 ANXA5 SLC2A3 FTH1 ATP6V1B2 LST1 IRF9 MRFAP1L1 LEPROT SUPT4H1 GGPS1 MAP2K4 CHMP1B NACC2 RAB21	NO
GAZIN_EPIGENETIC_SILENCING_BY_KRAS	0.996769	1	0.0359969	0.191029	0.509929	21	S100Z EID1 MRGBP EZH2 TRIM37 MAPK1 PTK2B BAZ2A ZNF354B BMI1 EED ASF1A PDPK1	NO
GEISS_RESPONSE_TO_DSRNA_UP	0.000859506	0.0233307	0.477271	0.604163	1.8258	36	TNFAIP6 HMGB2 IFIT1 SAT1 PSMA3 ATF3 CHN1 ANXA1 NMI SRGN BIRC2 TAP1 PLAUR ADAR KLF4 AFAP1 CFLAR TNFAIP3 CCL4 NFKBIA TNFAIP2 ACSL3	YES
GENTILE_RESPONSE_CLUSTER_D3	0.817915	0.99833	0.0407404	0.244614	0.780504	46	POLE2 SIAH2 CKS2 ELF4 ZFAND5 AMD1 BNIP2 MCL1 RIPK1 TAF11 TRAPPC8 LSM14A TRIM13 DR1 TNFAIP8 TLK1 HERPUD1 RHOB SLC25A44 COIL MBD2 RPP40 BMI1 SLBP	NO
GENTILE_UV_HIGH_DOSE_DN	0.00204622	0.0432217	0.431708	0.371343	1.4877	250	SATB2 MAP1B GEM COL13A1 LPAR1 GAS1 HMGB2 ISG15 POLE2 PLPP3 SAT1 NFYB ATF3 NFIL3 PDCD10 KLF10 PDGFRA DDIT3 SIAH2 CKS2 LHFPL2 CHSY1 PMAIP1 TRIP10 PMP22 ZNF117 BACH1 IGF2BP3 NIPSNAP2 ASPH MORC3 QKI DUSP1 PHC2 ELF4 COX6A1 UGCG ELOB STX3 ATP6V1B2 CDK7 TSC22D3 EAPP IFNGR2 STXBP3 AURKA ZFAND5 CASP3 CEBPD ZFP36 TNFRSF1A TNFAIP3 AMD1 CASP8 MAPK6 RBMS1 USP1 MPHOSPH6 BNIP2 RAB11A PUDP STRN3 MCL1 CHD1 MRFAP1…	NO
GENTILE_UV_LOW_DOSE_DN	0.0638298	0.33839	0.2114	0.415797	1.37669	55	SATB2 MYO10 COL13A1 DOCK1 SEMA3C ZNF804A PTPRM EIF4G3 SEMA5A TBC1D30 MICAL2	NO
GENTILE_UV_LOW_DOSE_UP	0.704362	0.95415	0.0519512	0.311182	0.830662	21	ISG15 PLK2 PMAIP1 SYF2 TAP1	NO
GENTILE_UV_RESPONSE_CLUSTER_D1	0.0825083	0.375719	0.199915	0.557615	1.40497	15	GEM ZNF117 ASPH DUSP1 STX3 STXBP3 CASP3	NO
GENTILE_UV_RESPONSE_CLUSTER_D2	0.0278504	0.23324	0.352488	0.547657	1.5925	30	SATB2 MAP1B GAS1 BACH1 TNFAIP3 CHD1 NFE2L2 SNX4 NRIP1 GTF2E1 RYBP RAPGEF2 ID2	NO
GENTILE_UV_RESPONSE_CLUSTER_D4	0.671408	0.941624	0.0483118	0.265659	0.873264	52	HMGB2 PDCD10 KLF10 CHSY1 PHC2 AURKA ZFP36 MAPK6 USP1 THUMPD1 SIAH1 DDX3X RAB1A EEF1E1 UFL1 SEC24B SMURF2 PPP2R5C RAPGEF2	NO
GENTILE_UV_RESPONSE_CLUSTER_D5	0.512048	0.855597	0.0636424	0.334646	0.979787	31	DDIT3 LHFPL2 ATP6V1B2 MPHOSPH6 MRFAP1L1 FOSL2 LBR UBE2N JMJD6 TLK2 NAV3 DYRK1A ZFP36L2 SRSF3 MLX	NO
GENTILE_UV_RESPONSE_CLUSTER_D6	0.200301	0.582891	0.116739	0.420897	1.2239	30	LPAR1 NFYB NFIL3 PDGFRA IGF2BP3 QKI UGCG CDK7 IFNGR2 STRN3 EPS8 RAB14 NCK1	NO
GENTILE_UV_RESPONSE_CLUSTER_D7	0.0634441	0.337229	0.21925	0.461504	1.39088	35	PLPP3 TRIP10 PMP22 NIPSNAP2 MORC3 EAPP CEBPD TNFRSF1A CASP8 RBMS1 RAB11A PUDP CDK8 PRKCD EMG1	NO
GENTILE_UV_RESPONSE_CLUSTER_D8	0.524887	0.863652	0.0625237	0.320221	0.958396	34	MARCKS CDYL CBX3 TSPAN5 HNRNPH3 MAPK14 MT1X SPRED2 INSIG1 HMGN4 HMGCR PPP1R12A PPID NACC2	NO
GENTILE_UV_RESPONSE_CLUSTER_D9	0.564103	0.88579	0.0619763	0.341432	0.929541	23	ADM IDI1 RBPJ KIAA0232 TMEM97 ACVR1B NAP1L1 CCNG1 CD2AP	NO
GENTLES_LEUKEMIC_STEM_CELL_DN	0.0349816	0.263875	0.321776	0.626251	1.57791	15	SKA3 OLFM4 CSTA CCNA1 RNASE2 CLC RNASE3 ANLN	NO
GENTLES_LEUKEMIC_STEM_CELL_UP	0.0222129	0.203976	0.352488	0.572213	1.57116	24	EVI2A HOPX GIMAP2 PCDHGA10 LGALSL GIMAP7 ICAM1 SLC37A3 VNN1 HLF GSAP	NO
GEORGES_CELL_CYCLE_MIR192_TARGETS	0.904149	1	0.0348652	0.217914	0.723055	58	RAP1GAP PLS3 NBN KIF20B DEK KIF14 CDC7 USP1 CRK NCAPH MIS12 BRCA1 TOP1 NFIB CUL5	NO
GERHOLD_ADIPOGENESIS_DN	0.259797	0.662597	0.0978773	0.355016	1.14608	48	MMP14 GAS1 ANXA3 VCAN G0S2 IL1R1 ANXA5 GAS6 THBD TUBA1A IER3 CEBPD BID IFRD1 CASP8 CCT2 TNFAIP2	NO
GERHOLD_ADIPOGENESIS_UP	0.546142	0.876459	0.0607719	0.313772	0.953865	37	ACSL1 DDIT3 STAT1 CD36 PMP22 CEBPB PPA1 PLIN2 CFD MCL1 GADD45A ALDH2 CPT2 STAT3 VLDLR ACADS LDHA SCP2 MNT GCLM	NO
GERY_CEBP_TARGETS	0.00010461	0.00466434	0.538434	0.510922	1.85031	97	S100A8 TNFAIP6 C3 LPL ORM1 SAT1 HP ATF3 LCN2 VCAN ACSL1 GLRX IGF2 GADD45B RNASE2 DDIT3 LYZ MNDA RGS2 ABCA1 HGF SERPINI1 CD1D PLAUR DUSP1 GPCPD1 JUNB KLF4 SLFN12 GSDME TFRC FOS IFRD1 LPGAT1 ZFAND2A	NO
GESERICK_TERT_TARGETS_DN	0.0165264	0.173559	0.352488	0.659862	1.69335	17	NFIL3 ERRFI1 KLF10 GADD45B SIAH2 DUSP6 JUNB KLF4 NFKBIZ IER3 ZFP36	YES
GHANDHI_BYSTANDER_IRRADIATION_UP	0.00010551	0.00466434	0.538434	0.590596	1.94969	54	BCL2A1 IL1B SAT1 PLEK2 IRAK3 PLA2G4A CXCL10 KYNU NAMPT G0S2 C9orf72 MT1E CD69 DNAJB4 TNFSF15 CREB5 RGS9 ZC3H12C MCTP1 B3GNT5 CXCL1 SLC16A6 NFKBIZ OSGIN2 PTGS2 MT1X MCTP2 CXCL5 TNFAIP3 ATP6V1C1 SLC39A8	YES
GHANDHI_DIRECT_IRRADIATION_DN	0.820106	0.999623	0.0681513	-0.25924	-0.789565	22	CCDC85C BCL11A PTK7	NO
GHANDHI_DIRECT_IRRADIATION_UP	0.000383766	0.0126721	0.498493	0.524893	1.81451	69	FAM20A BCL2A1 IL1B FRMD4A BLOC1S2 PLEK2 TRIAP1 KYNU NAMPT FAS G0S2 MT1E VWCE MYBL1 CREB5 CYP26B1 RGS9 ZC3H12C PRDM1 TNFRSF10C CXCL1 SLC16A6 RRM2B NFKBIZ PTGS2 MT1X PTPRE CXCL5 TNFAIP3	YES
GILDEA_METASTASIS	0.213141	0.603117	0.116739	0.45484	1.22643	22	AKR1C3 TACSTD2 HNMT SRGN VAMP5 BST2 IFI16 GLIPR1 MYL9 PTX3	NO
GINESTIER_BREAST_CANCER_20Q13_AMPLIFICATION_DN	0.00578394	0.0881207	0.407018	-0.311086	-1.39613	171	GPC2 KIFC1 TSPOAP1-AS1 CAPN15 NSUN5P1 PASK ITPR3 DDX11 ZMIZ2 DMD MKI67 LENG8 TMEM147-AS1 TSPOAP1 ZNF316 CHEK1 DHX37 EHMT2 ZNF142 HCFC1 TCOF1 PPARD ZNRD1ASP TJAP1 PODXL ZNF318 ENGASE NPIPB3 PML TEPSIN QSOX2 TNFRSF25 MADD PRRC2A UQCC2 DNHD1 TRRAP SZT2 GTPBP2 FBXL18 RAPGEF1 SH3BP5-AS1 EIF4G1 PLXND1 PNN DGKZ RNF220 LIMD2 ZNF532 MCM3 ITFG2 DPH7 ARHGAP17 GRAMD4 DXO MCM5	NO
GINESTIER_BREAST_CANCER_20Q13_AMPLIFICATION_UP	0.0993464	0.411316	0.159647	0.352488	1.27313	95	DPM1 BNIP3L F2R ROMO1 ITPRIPL2 PFDN1 AZI2 ZNF91 BLVRB RAPH1 RBM3 ATP5F1E RNASE4 CAVIN2 BLOC1S6 ODR4 IFT22 AP1AR PPP1R3D EFCAB11 SEC62 CFD TSHZ2 TMBIM4 FNIP1 RHOBTB3 DAAM1 LEPROT HSP90AA1	NO
GINESTIER_BREAST_CANCER_ZNF217_AMPLIFIED_DN	2.00911e-12	1.01586e-09	0.898671	-0.434085	-2.08641	293	APBA1 CFAP410 ATAT1 COPS7B GPC2 UPB1 NUTM2E HIP1R AP5S1 CAPN15 NSUN5P1 TMEM63A ZNF444 DMWD AGRN SPPL2B FBRSL1 KCNK5 ABCA7 ZDHHC24 INTS1 SPHK2 DDX11 ZMIZ2 ATXN2L QTRT1 MAPRE3 MINK1 LENG8 CNTROB CRYGS SGSM3 CUL9 REXO1 ATAD3A PPRC1 IL18BP ZNF316 ERCC2 LMNA POLM SCAF1 EHMT2 NEURL4 TAF1C SYMPK ZC3H7B SEMA6C HCFC1 TCOF1 PPARD ZNF580 ENGASE CUL7 DOT1L NPIPB3 ATAD3B SNRNP70 TEPSIN SRRT CCAR2 RBM14 ABCC10…	NO
GINESTIER_BREAST_CANCER_ZNF217_AMPLIFIED_UP	0.245566	0.649192	0.0975449	0.335585	1.15407	67	F8 F2R GNB4 WSB1 SLU7 FAM114A1 BLOC1S6 LACTB CHURC1 MINDY2 SP1 WASHC4 TRAK2 ATG12 LEPROT SIAH1 SLC17A5 HEATR3 POLK UFL1 ATP6V1A DNAJB14 STAG2 SPPL2A YIPF5 ZBTB38 TRIP11 LPP SCAF11 BMPR2 SRSF10 GINM1 KCTD20 SF3B1 LIN52 CREB1 DNAJC21 RSBN1L INIP PWWP2A FKBP14	NO
GNATENKO_PLATELET_SIGNATURE	0.0367513	0.269554	0.321776	0.49589	1.52652	39	HBB RPL41 MYL6 B2M PPBP RNF24 RGS10 FTH1 NCOA4 MYL12A PGRMC1 OAZ1 CCL5 DYNLL1 MLH3 PTMA F13A1 CFL1 ITM2B	NO
GOBERT_CORE_OLIGODENDROCYTE_DIFFERENTIATION	0.505232	0.850897	0.0639272	0.330028	0.977512	32	SLC25A27 RGS2 ABCA1 NUMB RNF13 LRRN1 SORBS1 EXT1 RAB2B IL6R NARF HBP1 CCNG1 NDRG1 MBP	NO
GOBERT_OLIGODENDROCYTE_DIFFERENTIATION_UP	0.0123605	0.144295	0.38073	-0.245295	-1.22502	491	SPC24 CDC20 KIF2C PIF1 BIRC5 NEURL1B RECQL4 NEK2 RRM2 ANKRD24 SLC29A2 ATOH8 UBE2C DEPDC1B PLK1 CEP55 CCNB2 ORC1 CCNE1 CDCA2 HAUS5 CDC45 CDCA3 GINS1 TRIP13 KIFC1 CCNF MAP2 KIF18B BUB1 RAD51 CDCA7L TIMELESS GTSE1 PAWR CAND2 CDC6 PTTG1 PASK CD38 INCENP CENPF FMC1 MRNIP CDKN3 WEE1 EXO1 MCM2 POLD1 UHRF1 CENPK KIF20A DDX11 BEND3 FAM83D TRMT61A ALDH16A1 SKA1 MKI67 NUP210 PLK4 PDLIM1 SHMT1 ESCO2 SRM CCNA…	NO
GOLDRATH_ANTIGEN_RESPONSE	0.025893	0.221431	0.352488	0.322628	1.31374	323	SLPI IGSF10 C3 BCL2A1 GEM EVI2A RAD51AP1 CA1 DBI GZMA GNG10 HMGB2 NRP1 HAT1 HEMGN PLSCR1 LAG3 IL18RAP KLRB1 TMEM126A LGALS3 RPA3 NUSAP1 ANXA1 NFIL3 HOPX RHCE ERRFI1 YBX3 TCEAL9 SLC4A1 MGST1 GLRX LILRA5 GADD45B LMNB1 MYL4 CASP1 F2R C4orf3 TXN ABRACL CKS2 ALAS2 SNX10 S100A6 FGL2 PLBD1 PGLYRP1 LYN BATF3 GZMB NUDT4 ANLN SNX3 KLRK1 MTHFD2 RBM3 CYFIP1 RHOQ PRDM1 DOCK5 S100A11 HPF1 TYROBP DUSP1 LITAF VA…	NO
GOLDRATH_HOMEOSTATIC_PROLIFERATION	0.00772808	0.107055	0.407018	0.401505	1.50361	133	NDUFB3 ATP5PF RPIA AQP9 HSPE1 UBL5 PSMC6 IGF2BP2 RNF11 GK NABP1 NIFK MRPS33 ETFBKMT CD55 KCTD12 NDUFAB1 EID1 SMN2 SOS2 TAF9 MPC2 HDGF MAGOH PPA1 PACRGL IMPA2 SEC62 SORL1 PTGES3 VTI1B GMFB UBE2E1 UBALD2 GALK1 IL10RB RAB18 ATP6V0B SIAH1 TAF1D ARL14EP EOMES SLC7A5 CETN3 TM9SF3 GNPNAT1 C3orf38 NACC2 SEL1L ZNF131 WIPF1 NUDCD2 VAMP4 TRNT1 ROCK1 RAB5C RAD23B RNF141 YME1L1 MMUT YIPF5 ITFG1 LIN7C PARK7 CA…	NO
GOLDRATH_IMMUNE_MEMORY	0.0783476	0.370572	0.190023	0.406229	1.3412	56	AQP9 VRK1 F2R GK PROS1 CHPT1 RRM2B RNASE4 CD160 SORBS1 CD55 KCTD12 SOS2 RNF138 IL15RA PTPN22 MCOLN2 CTSW IL10RB RPGR EOMES PDE8A NR1D2 TMEM141 PRNP	NO
GOLUB_ALL_VS_AML_DN	0.0104018	0.129662	0.38073	0.641144	1.71145	21	LGALS3 STOM SRGN LYZ LYN CD33 PPIF ITGAX ZYX CFD NFKBIA CST3 MCL1 LEPROT CFP	YES
GOLUB_ALL_VS_AML_UP	0.648475	0.93115	0.0554793	0.312891	0.859126	24	PSMA6 SRP9 ZNF22 GTF2E2 MYL6B MYB ACADM IRF2	NO
GOTTWEIN_TARGETS_OF_KSHV_MIR_K12_11	0.441135	0.816841	0.0679923	0.305001	1.01895	59	TMEM255A ATP6V1G1 C9orf78 TWF1 CDC42EP3 KIAA0408 PICALM AGTRAP SLA FOS DPY19L1 MYB AMOTL1 IKBIP HMGCS1 C2orf88 CARD6 PIK3CA RNF123 E2F3 SAMHD1 ERMAP FBXO33 PLEKHB2 TLE4 SCAMP1 FAM241B RNF31	NO
GOTZMANN_EPITHELIAL_TO_MESENCHYMAL_TRANSITION_DN	0.0392638	0.274844	0.252961	0.350876	1.33726	155	S100A8 IL1RN LGALS3 CAPZA2 STK3 MXI1 STOM SRP14 TMEM165 SLC35A1 PPP1CB IL1R1 MRC1 SLC1A5 COPS5 CDH1 TRIM25 DYNLT1 PTPRM SDC4 MTHFD2 GAS8 ZFP36L1 KLF4 NTAN1 CD55 MAPK14 PLXNA2 FOS CASP3 CALM2 ATP6V1E1 CLNS1A AMD1 ACADM OAZ1 NFKBIA XRN2 POLR1D UBE2H CDKN1A PSME1 MRPL23 RAB18 GDI2 EPS8 OSTF1 NPEPPS ARF4 CPT2 PA2G4 SERPINB6 ABCD3 ATP6V1A RNF2 SLC3A2 SOD1 FKBP2 SDF2 CD82 TCEA1 SEPHS2 POLR2C YWHAZ ROCK…	YES
GOTZMANN_EPITHELIAL_TO_MESENCHYMAL_TRANSITION_UP	0.418006	0.798694	0.118288	-0.264986	-1.00078	51	CCN2 COL4A1 SERPINE1 KIFC1 FBLN2 CSF1 JUN MKI67 PLK4 CHEK1	NO
GOZGIT_ESR1_TARGETS_UP	0.154653	0.514238	0.125033	0.333016	1.20567	99	S100A12 KRT5 IGFBP3 DSC2 GAS1 TCF7L2 ADAMTSL4 SLC25A37 COX7B SUB1 CDC42EP3 PRKAG2 IGF2BP3 ASPH OSBPL1A SMPDL3A IL18 THSD7A KCTD12 CSF3R ITSN1 NAGA SEMA5A ACAA2 MICAL2 FOS ALOX5 PLD1 CRISPLD2 DEGS1	NO
GO_14_3_3_PROTEIN_BINDING	0.66205	0.938295	0.0815265	-0.277454	-0.880777	26	SIK1 KLHL22 RPTOR	NO
GO_2_IRON_2_SULFUR_CLUSTER_BINDING	0.0764228	0.3673	0.206588	0.540007	1.42131	19	FECH GLRX5 ISCA1 CISD2 GLRX2 ISCA2 SDHB AIFM3 ISCU CISD3 FDX1 FXN UQCRFS1	NO
GO_2_OXOGLUTARATE_DEPENDENT_DIOXYGENASE_ACTIVITY	0.491329	0.846751	0.0636424	0.314499	0.992401	43	P4HA2 P3H3 P3H2 TET2 ASPH PLOD2 TYW5 EGLN1 ALKBH1 KDM7A JMJD6 ASPHD2 TMLHE TET3	NO
GO_3_5_DNA_HELICASE_ACTIVITY	0.000581711	0.0173759	0.477271	-0.724094	-2.00671	15	RECQL4 CDC45 GINS1 GINS4 GINS2	NO
GO_3_5_EXONUCLEASE_ACTIVITY	0.636888	0.92564	0.0513223	0.275865	0.896613	50	TATDN1 ISG20 PNPT1 TREX1 APLF	NO
GO_3_5_RNA_HELICASE_ACTIVITY	0.945813	1	0.0391956	0.226283	0.587483	18	TDRD9 DHX32 DHX35 YTHDC2 DHX40	NO
GO_3_UTR_MEDIATED_MRNA_STABILIZATION	0.179868	0.556855	0.130777	0.512816	1.2921	15	YBX3 RBM38 MYD88 MAPK14 ZFP36	NO
GO_4_IRON_4_SULFUR_CLUSTER_BINDING	0.616564	0.915566	0.0911073	-0.251643	-0.897942	40	POLD1 DDX11 NUBPL ERCC2 NUBP2 RTEL1 NDUFS7 CIAO3 CDKAL1 POLE TYW1B	NO
GO_5_3_EXONUCLEASE_ACTIVITY	1	1	0.0371479	0.148632	0.381421	17	XRN1 XRN2 DCP2 TRIR APTX EXO5	NO
GO_90S_PRERIBOSOME	0.029539	0.241629	0.352488	-0.481116	-1.54625	28	NOC4L FBXW9 TBL3 IMP4 UTP20 BOP1 PWP2 NOL6 NOC2L BMS1 WDR12 KRI1 WDR3 BTRC HEATR1	NO
GO_9PLUS0_NON_MOTILE_CILIUM	0.45	0.823829	0.115734	-0.267416	-1.00176	53	CFAP410 PRCD SPTBN5 GNA11 WHRN PTPRK	NO
GO_9PLUS2_MOTILE_CILIUM	0.641399	0.92778	0.0515309	0.283706	0.885474	42	RSPH9 IFT81 NME8 SPATA6 SLIRP GAS8 CD52 IQCG SLC9B1 SPAG16 ABHD2 GABARAP	NO
GO_ACETYLGALACTOSAMINYLTRANSFERASE_ACTIVITY	0.685241	0.946168	0.0499914	0.28709	0.840548	31	GALNT5 B3GALT2 CHSY1 GALNT3 B3GNT5 GALNT4 CSGALNACT2 GALNT1	NO
GO_ACETYLGLUCOSAMINYLTRANSFERASE_ACTIVITY	0.0455834	0.292674	0.321776	-0.415827	-1.48967	41	MGAT2 MGAT3 B3GNT7 ALG14 PIGH RFNG XYLT2 LARGE1	NO
GO_ACETYLTRANSFERASE_ACTIVITY	0.981107	1	0.0280107	0.175865	0.628321	93	HAT1 SAT1 NAA20 BRCA2 KAT2B GTF2B NAGS LPCAT2 NAT1 ESCO1 TAF9 ACAA2 SAT2	NO
GO_ACETYL_COA_BIOSYNTHETIC_PROCESS	0.630293	0.921574	0.0574877	0.331025	0.87517	20	PDK4 MPC1 MPC2 DLD GSTZ1 PDHX PDP1	NO
GO_ACETYL_COA_BIOSYNTHETIC_PROCESS_FROM_PYRUVATE	0.127063	0.466286	0.158514	0.538444	1.35667	15	PDK4 MPC1 MPC2 DLD GSTZ1 PDHX PDP1	NO
GO_ACIDIC_AMINO_ACID_TRANSPORT	0.553731	0.880105	0.059476	0.308278	0.942242	38	NTSR1 SLC1A7 SLC1A3 SNCA P2RX7	NO
GO_ACID_SECRETION	0.15491	0.514253	0.128789	0.364169	1.23966	63	NTSR1 SLC1A7 ATP5PF IL1B SLC22A16 AQP9 ANXA1 SLC1A3 PLA2G4A SNCA SNX10 P2RX7 SLC1A5 HRH2	NO
GO_ACID_THIOL_LIGASE_ACTIVITY	0.693053	0.949181	0.0526973	0.314353	0.839127	21	ACSL1 SLC27A3 ACSS3 ACSL4 ACSL3 SUCLG1 SLC27A5 SLC27A2	NO
GO_ACROSOMAL_VESICLE	0.962697	1	0.031998	0.199076	0.658266	57	SV2B SPESP1 SLIRP ADAM15 RCBTB2 ABHD2 MORN2 CD46 ATP8B3 DLD FLOT2 ITGA1 NCF2 BSG HEXB	NO
GO_ACTININ_BINDING	0.390244	0.777551	0.0813027	0.400671	1.05458	19	XIRP2 MYBPC3 PALLD TRPC6	NO
GO_ACTIN_BASED_CELL_PROJECTION	0.485849	0.842891	0.135002	-0.223259	-0.983934	143	RAPGEF3 ENAH MYO1B FSCN2 HLA-G MUC20 TSPEAR WHRN MAP2 MYO1A SLC27A4 AOC3 FSCN1 CDHR2 MYO1C DMD SCARB1 TPRN PPP1R9A BAIAP2 CEACAM1	NO
GO_ACTIN_BINDING	0.628348	0.920591	0.0402478	0.231561	0.942553	310	NEBL XIRP2 MYO10 MAP1B POF1B MYH15 AIF1 GMFG SPTA1 CAPZA2 MYO6 MARCKS WASF3 EPB41L3 FMN1 ARPC3 MYBPC3 CNN3 MYL4 SHTN1 CTNNAL1 SPTB PLS3 TWF1 KCNMA1 SNCA MEFV AFDN EPS8L1 SPIRE1 PALLD TRPC6 SNTG2 FGD4 CAPZA1 ANLN ITPRID2 KIF18A WASF1 LRRK2 CYFIP1 PSTPIP2 WASHC1 ARPC5 NEXN MSRB1 KLHL2 SPIRE2 ARPC2 SORBS1 NOD2 AFAP1 SSH2 CCDC88A	NO
GO_ACTIN_CYTOSKELETON	0.60396	0.910725	0.0414044	0.232444	0.952787	355	RTKN NEBL PGM5 XIRP2 MYO10 POF1B MYH15 AIF1 MYL6 CDC42BPA GMFG DLC1 SPTA1 SH3PXD2B CAPZA2 MYO6 ANXA1 MARCKS TNNT1 CENPQ FMN1 ARPC3 MYBPC3 CNN3 MYL4 SPTB PLS3 TWF1 ANKRD23 IFIT5 SNCA SPECC1 KAT2B MYL12B RHOU PALLD CTTNBP2NL FGR CDH1 CAPZA1 ANLN CDC42EP3 DCTN6 HCK WASF1 TMEM63B RHOQ PSTPIP2 ARPC5 MSRB1 FLOT1 MYL6B KLHL2 ARPC2 SORBS1 AFAP1 CAVIN2 RAB5A EEF1A1 ZNF268 PTPN12 GBP2 MYO3B TMOD1 ACTR10 ZY…	NO
GO_ACTIN_CYTOSKELETON_REORGANIZATION	0.769444	0.982605	0.0409884	0.237526	0.827881	75	NRP1 CDC42BPA GMFG ANXA1 PLEK2 PDGFRA PLEK GPR65 HCK RAP2A THSD7A CDK5 RICTOR TEK DTNBP1 CDC42 F11R HRAS CSF1R EPS8 S1PR2 GAB1 PAK1 GSN RHOA PTK2B FES	NO
GO_ACTIN_FILAMENT	0.679558	0.944427	0.0464155	0.253723	0.887522	76	POF1B AIF1 MYO6 ANXA1 FMN1 PLS3 TWF1 SPECC1 PALLD HCK RHOQ PSTPIP2 TMOD1 IQGAP1 FKBP15 TEK PLS1 ESPN	NO
GO_ACTIN_FILAMENT_BASED_MOVEMENT	0.0873656	0.387281	0.173748	0.36727	1.29725	80	FGF13 TRPM4 DSC2 SGCD MYL6 MYO6 KCNJ2 KCND3 TNNT1 MYBPC3 MYL4 SHTN1 SCN1B	NO
GO_ACTIN_FILAMENT_BINDING	0.174242	0.548704	0.114267	0.310831	1.16708	140	NEBL XIRP2 MYO10 POF1B MYH15 AIF1 SPTA1 CAPZA2 MYO6 MARCKS ARPC3 MYBPC3 MYL4 SHTN1 CTNNAL1 SPTB PLS3 TWF1 AFDN CAPZA1 ITPRID2 CYFIP1 PSTPIP2 ARPC5	NO
GO_ACTIN_FILAMENT_BUNDLE	0.45815	0.829365	0.0678338	0.315997	1.00827	46	NEBL PGM5 XIRP2 MARCKS PLS3 SORBS1 ZYX TEK MYL9 PLS1 CYBA DCTN4	NO
GO_ACTIN_FILAMENT_BUNDLE_ORGANIZATION	0.0399594	0.277248	0.321776	-0.310937	-1.32103	116	WNT11 SYNPO RAPGEF3 SORBS3 MYO1B FSCN2 CCN2 ARHGEF5 PHACTR1 PRKN ASAP3 PAWR FSCN1 HSP90B1 PPP1R9A MET BAIAP2 ADD2 EVL ABL1 CARMIL1 SHROOM1	NO
GO_ACTIN_FILAMENT_DEPOLYMERIZATION	0.29595	0.7013	0.141225	-0.291219	-1.06903	46	TMOD4 CARMIL2 PLEKHH2 SPTBN5 MICAL3 SPTBN1 VILL SPTAN1 ADD2 CARMIL1	NO
GO_ACTIN_FILAMENT_ORGANIZATION	0.447368	0.822693	0.197822	-0.209128	-1.00517	293	WNT11 SYNPO RAPGEF3 SORBS3 MYO1B FSCN2 CCN2 TMOD4 KANK3 C15orf62 CARMIL2 PLEKHH2 SPTBN5 MICAL3 HIP1R TCAP ARHGEF5 PHACTR1 PRKN ASAP3 PAWR FSCN1 PLEKHG2 SPTBN1 ANG RHOBTB2 MYOM1 TTN MYO1C HSP90B1 VILL SPTAN1 PPP1R9A MET BAIAP2 ADD2 EVL MYOM2 CCR7 ABL1	NO
GO_ACTIN_FILAMENT_POLYMERIZATION	0.680556	0.944427	0.0422468	0.239499	0.900107	141	AIF1 GMFG SPTA1 CAPZA2 WASF3 FMN1 ARPC3 SPTB TWF1 WASHC3 JAK2 SPIRE1 CAPZA1 CDC42EP3 HCK WASF1 ICAM1 CYFIP1 PSTPIP2 WASHC1 ARPC5 MSRB1 SPIRE2 ARPIN ARPC2 TMOD1 RICTOR AP1AR DIAPH3 ABITRAM BAG4 PYCARD GMFB ARHGAP18 BRK1 PRKCD ACTR2 EPS8 TMSB4Y NCK1 RAC1 TMOD2 GSN RHOA CDC42EP2 PTK2B ARPC4 IQGAP2 ACTR3 ARPC1A CDC42EP4 WIPF1 DMTN SCIN BBS4 MTPN ARPC5L	NO
GO_ACTIN_MEDIATED_CELL_CONTRACTION	0.0394366	0.275006	0.271289	0.419736	1.40675	60	FGF13 TRPM4 DSC2 SGCD MYL6 KCNJ2 KCND3 TNNT1 MYBPC3 MYL4 SHTN1 SCN1B	NO
GO_ACTIN_MONOMER_BINDING	0.943299	1	0.0601186	-0.219897	-0.652756	20	NOS3 ABL1 COBLL1	NO
GO_ACTIN_NUCLEATION	0.0930576	0.399111	0.176694	0.423095	1.33352	44	GMFG FMN1 ARPC3 SPIRE1 WASF1 CYFIP1 WASHC1 ARPC5 SPIRE2 ARPIN ARPC2 AP1AR GMFB BRK1 ACTR2 GSN ARPC4 IQGAP2 ACTR3 ARPC1A WIPF1 SCIN ARPC5L	NO
GO_ACTIN_POLYMERIZATION_OR_DEPOLYMERIZATION	0.718482	0.961383	0.0383206	0.230668	0.883226	164	AIF1 GMFG SPTA1 CAPZA2 WASF3 FMN1 ARPC3 SPTB TWF1 WASHC3 JAK2 SPIRE1 PLEK CAPZA1 CDC42EP3 HCK WASF1 ICAM1 CYFIP1 PSTPIP2 WASHC1 ARPC5 MSRB1 SPIRE2 ARPIN ARPC2 SSH2 TMOD1 SEMA5A RICTOR AP1AR MICAL2 DIAPH3 ABITRAM BAG4 PYCARD GMFB ARHGAP18 BRK1 DSTN PRKCD ACTR2 EPS8 ABI1 CAP1 TMSB4Y NCK1 RAC1 TMOD2 GSN RHOA CDC42EP2 PTK2B ARPC4 IQGAP2 ACTR3 ARPC1A CDC42EP4 CFL2 WIPF1 CFL1 DMTN SCIN BBS4 MTPN SSH3 A…	NO
GO_ACTION_POTENTIAL	0.162088	0.527574	0.125033	0.349838	1.21874	73	FGF13 NTSR1 TRPM4 DSC2 SLC8A1 HCN2 KCNJ2 KCND3 SCN1B FKBP1B CD36 SCN9A GBA SUMO1 RNF207 P2RX1	NO
GO_ACTIVATED_T_CELL_PROLIFERATION	0.28012	0.684537	0.0956031	0.386816	1.15287	33	IGF2 ARG1 CLC LGALS9 PDCD1LG2 HMGB1 IL23R IL18 RIPK3 CASP3 PYCARD PRKAR1A	NO
GO_ACTIVATING_TRANSCRIPTION_FACTOR_BINDING	0.170418	0.541722	0.193813	-0.318424	-1.20259	51	ATOH8 ZFPM1 WFS1 CIITA HOXB4 BHLHE41 IFI27 JUN MYC HCFC1 LDB2 HDAC7 MEF2D TP53BP1 LDB1	NO
GO_ACTIVATION_OF_ADENYLATE_CYCLASE_ACTIVITY	0.0394662	0.275006	0.321776	-0.571032	-1.62799	17	TMIGD3 ADRB1 P2RY11 GIPR ADCY3 ADORA2B LGR4	NO
GO_ACTIVATION_OF_CYSTEINE_TYPE_ENDOPEPTIDASE_ACTIVITY_INVOLVED_IN_APOPTOTIC_PROCESS	0.00679947	0.0982281	0.407018	0.471224	1.64162	73	S100A8 CASP5 S100A9 DLC1 HSPE1 CASP1 F2R BAD FAS SNCA JAK2 TNFSF15 PMAIP1 NLRC4 CASP4 P2RX1 DIABLO TNF CTSH TNFSF10 BID CASP8 PYCARD ROBO1 CARD8 COL4A3 IFT57 RIPK1 CASP8AP2	NO
GO_ACTIVATION_OF_GTPASE_ACTIVITY	0.0598097	0.328296	0.321776	-0.344813	-1.36511	73	USP6 TBC1D3C TBC1D3D SCRIB FOXJ1 TBC1D7 PLEKHG4 SGSM2 SGSM3 TBC1D16 CCR7 RASGRP1 AKT2 RCC2 RANGAP1 TBC1D4 RAPGEF1 EVI5L TSC1 EPHA1 USP6NL TBC1D13	NO
GO_ACTIVATION_OF_IMMUNE_RESPONSE	0.00075347	0.0213132	0.477271	0.336996	1.40715	492	S100A8 LY96 C3 MYO10 TNIP3 C1QB HLA-DQA2 S100A9 COLEC12 CLEC4D PSMA4 TLR5 DOCK1 RSAD2 PLSCR1 LILRA4 C4A RIOK3 PSMA3 LGALS3 C3AR1 LILRB4 C1QA CFH FFAR2 PSMA6 TLR8 FPR2 FCGR1A RPS27A ALPK1 IRAK3 ARPC3 PSMC6 TREX1 TLR4 CD3D FCGR2A FPR3 TLR3 TBK1 FPR1 CLEC4A PSMA2 C5AR1 MNDA CMKLR1 PSMB9 PIK3AP1 CLEC7A TLR2 TSPAN6 CD36 C1R TNFRSF21 CD14 PROS1 FCER1G BIRC2 PGLYRP1 LYN DUSP3 TANK UBE2D1 NLRC4 MYD88 FGR…	YES
GO_ACTIVATION_OF_INNATE_IMMUNE_RESPONSE	5.09504e-06	0.000380122	0.610527	0.435121	1.74717	260	S100A8 LY96 TNIP3 S100A9 COLEC12 CLEC4D PSMA4 TLR5 RSAD2 LILRA4 RIOK3 PSMA3 FFAR2 PSMA6 TLR8 RPS27A ALPK1 IRAK3 PSMC6 TLR4 TLR3 TBK1 CLEC4A PSMA2 MNDA PSMB9 PIK3AP1 CLEC7A TLR2 TSPAN6 CD36 CD14 FCER1G BIRC2 PGLYRP1 LYN TANK UBE2D1 NLRC4 MYD88 TLR7 HMGB1 IFI16 LTF TLR6 CD300LF KLRK1 CARD9 HCK FCN1 DDX60 CLEC4E TLR1 CTSS CTSL FLOT1 CTSB CLEC6A UNC93B1 TIFA UBE2D3 TICAM2 WDFY1 NOD2 PELI1 CLEC10A PSM…	YES
GO_ACTIVATION_OF_JUN_KINASE_ACTIVITY	0.88253	1	0.0383996	0.240094	0.715578	33	MAP3K20 MLKL MAP3K6 MAP3K13 RIPK2 TNFSF11 MAP4K5 MAP3K5 RIPK1	NO
GO_ACTIVATION_OF_MAPKK_ACTIVITY	0.217327	0.608156	0.109684	0.371726	1.18609	46	MAP3K20 GADD45B F2R JAK2 LAMTOR3 MLKL LRRK2 EGF MAP3K6 ADAM9 MAP3K13 RIPK2 CRK TGFBR1 PSEN1 MAP3K8 MAP3K5 RIPK1	NO
GO_ACTIVATION_OF_MAPK_ACTIVITY	0.111111	0.436566	0.151149	0.340304	1.24032	110	LPAR3 NRG1 LPAR1 IL1B MAP3K20 RPS27A TLR4 FPR1 PROK2 C5AR1 P2RX7 DUSP6 C5 MLKL HGF LRRK2 EGF TNF MAP3K6 NOD2 MAPK14 MAP3K13 RIPK2 TNFSF11 MAP2K6 ITGA1 AVPI1 MAP4K5 MAP3K5 MAP2K3 PTPRC RIPK1 TAB3 PEA15 FRS2 UBE2N S1PR2 MAP2K4 MAP2K2 SOD1 CXCR4 MAPK1	NO
GO_ACTIVATION_OF_NF_KAPPAB_INDUCING_KINASE_ACTIVITY	0.425743	0.803386	0.0774768	0.407252	1.02612	15	TLR3 TNFSF15 TLR6 COPS8	NO
GO_ACTIVATION_OF_PHOSPHOLIPASE_C_ACTIVITY	0.189369	0.570305	0.127505	0.489555	1.2563	17	P2RY6 LPAR1 C5AR1 P2RY12 RASGRP4	NO
GO_ACTIVATION_OF_PROTEIN_KINASE_ACTIVITY	0.0851554	0.381454	0.161979	0.307052	1.2289	248	FGF13 LPAR3 EFNA5 NRG1 LPAR1 ADRA2A IL1B MAP3K20 STRADB PDGFC STK3 RPS27A TLR4 PRLR GADD45B F2R TLR3 FPR1 PROK2 C5AR1 TXN P2RX7 JAK2 TNFSF15 LAMTOR3 DUSP6 SLC11A1 IL23R GAS6 PRKAG2 TLR6 C5 MLKL HGF LRRK2 OSBPL8 KIF14 EGF TNF MAP3K6 NOD2 CCDC88A MAPK14 ADAM9 IL18 PDGFB MAP3K13 RIPK3 RIPK2 RICTOR CD300A SOCS1 TNFSF11 MAP2K6 CRK TGFBR1 PRKAR1A ADRB2 ITGA1 AVPI1 PSEN1 CCL5 SRC MAP3K8 COPS8 MAP4K5 MAP…	NO
GO_ACTIVATION_OF_PROTEIN_KINASE_B_ACTIVITY	0.0977564	0.407743	0.179782	0.505949	1.36424	22	NRG1 ADRA2A TXN GAS6 OSBPL8 CCDC88A IL18 PDGFB RICTOR	NO
GO_ACTIVE_ION_TRANSMEMBRANE_TRANSPORTER_ACTIVITY	0.356006	0.757038	0.0799859	0.329754	1.07461	51	ATP6V1G1 ANXA5 ATP5MG ATP5F1C ATP1B3 MT-ATP6 ATP5F1E ATP5PO ATP5PB ATP6V1B2 ATP5F1D ATP6V1C1 ATP6V1E1 ATP1B2 ATP6V0E1 ATP6V1F ATP6V1D TCIRG1 ABCC4 ATP6V0B ATP5PD ATP7A ATP6V0C	NO
GO_ACTIVE_TRANSMEMBRANE_TRANSPORTER_ACTIVITY	0.111498	0.437662	0.140406	0.304136	1.20594	223	SLC18A1 SLC4A3 SLC1A7 SLC2A12 ABCA13 ABCG2 SLC26A8 SLC8A1 SLC4A10 SLC4A1 SLC5A9 SLC1A3 ATP6V1G1 ANXA5 SLC35E4 ABCC6 SLC46A2 ATP5MG SLC1A5 ABCA1 SLC22A1 ATP5F1C SLC22A4 TAP2 SLCO4C1 SLC11A1 ATP1B3 TIMM17A ABCA11P SLC15A4 MT-ATP6 TAP1 SLC6A12 ATP5F1E SLC24A4 SLC16A6 ATP5PO SLC36A1 ATP5PB ATP6V1B2 SLC15A3 SLC9B1 SLC6A6 SEC61G ABCB10 ATP5F1D SLC20A1 ATP6V1C1 SLC35D2 MCU ATP6V1E1 SLC6A8 SLC16A3 ATP1B2…	NO
GO_ACTIVIN_RECEPTOR_SIGNALING_PATHWAY	0.782946	0.987994	0.0452247	0.279804	0.781968	25	INHBB ACVR1C ACVR2A TGFBR1 INHBA FKBP1A FSTL3 ACVR1B	NO
GO_ACTOMYOSIN	0.544139	0.874996	0.0588438	0.293607	0.95681	51	NEBL PGM5 XIRP2 CDC42BPA KAT2B	NO
GO_ACTOMYOSIN_STRUCTURE_ORGANIZATION	0.270064	0.674765	0.0880945	0.292029	1.09363	133	RTKN NEBL PGM5 FRMD3 LPAR1 NRP1 CDC42BPA DLC1 SH3PXD2B TACSTD2 TNNT1 EPB41L3 MYBPC3 CNN3 PDGFRA MEF2A GPR65 ANLN EPB41L4A SERPINF2 SDC4	NO
GO_ACUTE_INFLAMMATORY_RESPONSE	1.32774e-05	0.000866246	0.593325	0.586143	2.00773	66	S100A8 C3 FFAR3 ORM2 IL31RA IL20RB DNASE1L3 IL1B ORM1 PLSCR1 F8 HP FFAR2 OSM F12 SERPINA1 FCER1G CEBPB TFR2 SERPINF2 ICAM1 CXCR2 TNF PTGS2 ELANE CD163 TREM1 APOL2 EIF2AK1	NO
GO_ACUTE_INFLAMMATORY_RESPONSE_TO_ANTIGENIC_STIMULUS	0.142857	0.493473	0.148262	0.508095	1.31913	18	C3 IL31RA IL20RB FCER1G ICAM1 CXCR2 ELANE	NO
GO_ACUTE_PHASE_RESPONSE	0.00359653	0.0653841	0.431708	0.633616	1.73976	24	ORM2 IL1B ORM1 PLSCR1 F8 HP SERPINA1 CEBPB TFR2 SERPINF2 TNF PTGS2 CD163 APOL2 TNFSF11	NO
GO_ACYLGLYCEROL_METABOLIC_PROCESS	0.682963	0.944834	0.049391	0.28064	0.863911	39	LPL DGKK GK SLC22A4 DGAT2 PGS1 INSIG1 SLC27A5 PANK2	NO
GO_ACYLGLYCEROL_O_ACYLTRANSFERASE_ACTIVITY	0.226073	0.620915	0.114751	0.482451	1.21559	15	MBOAT2 LPCAT2 DGAT2 LPGAT1 ABHD5 CRLS1 MBOAT7 AGPAT3	NO
GO_ADAPTIVE_IMMUNE_RESPONSE	0.0148776	0.161992	0.38073	0.330027	1.34426	322	C3 C1QB ARG2 TRPM4 CLEC4D IL31RA IL20RB IL1B RSAD2 C4A B2M IL18RAP LILRB4 C1QA ANXA1 TLR8 LILRB1 LILRB3 SEMA4A TREX1 FZD5 TLR4 CD3D ARG1 HPRT1 CLEC4G CLEC4A NBN CLC IL1R1 P2RX7 JAK2 BCL3 C1R SAMSN1 TNFRSF21 FCER1G LYN BATF CR1 TAP2 HMGB1 BTNL8 LOXL3 SLC11A1 SHLD3 MCOLN1 IL23R APLF C5 KLRK1 LILRA6 ICAM1 PRDM1 TAP1 SIGLEC10 CD1D CTSS CTSL ATAD5 TNFSF13 CLEC6A UNC93B1 TNF NFKBIZ CTSH CD160 SHLD2 IL1…	YES
GO_ADAPTIVE_IMMUNE_RESPONSE_BASED_ON_SOMATIC_RECOMBINATION_OF_IMMUNE_RECEPTORS_BUILT_FROM_IMMUNOGLOBULIN_SUPERFAMILY_DOMAINS	0.0106111	0.131233	0.38073	0.354204	1.39508	211	C3 C1QB TRPM4 IL31RA IL20RB IL1B RSAD2 C4A B2M IL18RAP C1QA ANXA1 TLR8 LILRB1 SEMA4A TREX1 FZD5 TLR4 ARG1 HPRT1 CLEC4G NBN CLC IL1R1 P2RX7 BCL3 C1R FCER1G BATF CR1 HMGB1 LOXL3 SLC11A1 SHLD3 IL23R APLF C5 ICAM1 CD1D ATAD5 TNFSF13 TNF NFKBIZ CTSH SHLD2 IL18R1 CD55 IL18 TFRC HAVCR2 BCL6 RIPK3 RIPK2 CCR2	YES
GO_ADAPTIVE_THERMOGENESIS	0.136304	0.483004	0.134273	0.333609	1.21804	111	ACHE PPARGC1A LCN2 PEMT IL15 PDGFC ACSL1 LEPR TLR4 PRLR DDIT3 G0S2 ADIPOR1 CMKLR1 EPAS1 JAK2 CD36 RHEB CEBPB IL18R1 IL18 ADAMTS5 CCR2 OMA1 RBPJ NRDC MAP2K6 ARRDC3 ADRB2 PCTP APC ACOT13	NO
GO_ADENYLATE_CYCLASE_ACTIVATING_G_PROTEIN_COUPLED_RECEPTOR_SIGNALING_PATHWAY	0.690883	0.948616	0.04707	0.261632	0.863797	56	ADRA2A ADM CXCL10 ADGRG6 GPR65 ABCA1 CALCRL ADGRE2 GNAL ADGRE3 ADGRG3 GNA13 ARRDC3 ADRB2 ADGRD1 OPRL1 CALCB ADGRB3 ADGRE1 PTGER3	NO
GO_ADENYLATE_CYCLASE_INHIBITING_G_PROTEIN_COUPLED_RECEPTOR_SIGNALING_PATHWAY	0.0590015	0.32604	0.227987	0.459654	1.39735	37	FFAR3 LPAR1 ADRA2A FPR2 RGS2 AKAP5 P2RY12 S1PR3 GNAL PSAP GNAI3 EDN1 PDE2A	NO
GO_ADENYLYLTRANSFERASE_ACTIVITY	0.912698	1	0.0629395	-0.223969	-0.682141	22	GPHN TUT1 ABL1 OAS2	NO
GO_ADHERENS_JUNCTION_ASSEMBLY	0.389503	0.777551	0.0728939	0.301434	1.04568	71	MMP14 EFNA5 NRP1 DLC1 FMN1 DUSP3 SDC4 LRP1 SORBS1 TRIP6 PTEN IQGAP1 TEK	NO
GO_ADHERENS_JUNCTION_ORGANIZATION	0.551948	0.880105	0.0531298	0.262731	0.956879	102	MMP14 EFNA5 RASSF8 NRP1 DLC1 NECTIN3 FMN1 AFDN DUSP3 CDH1 NUMB SDC4 LRP1 RAB8B SORBS1 TRIP6 PTEN	NO
GO_ADIPOSE_TISSUE_DEVELOPMENT	0.591528	0.901726	0.057006	0.301723	0.917237	37	TRPM4 UMODL1 PPARGC1A SH3PXD2B	NO
GO_ADP_BINDING	0.966767	1	0.0342688	0.202183	0.609339	35	MYO6 ME1 PRKAG2 TAP1 ATP5F1D PRKAG1 GCLC PGK1 P2RY1	NO
GO_ADRENERGIC_RECEPTOR_BINDING	0.843434	1	0.0455878	0.279965	0.708909	16	ADRA2A AKAP5 ARRDC3 NEDD4 ARRB2 ARRB1 RAPGEF2	NO
GO_ADULT_BEHAVIOR	0.586538	0.90074	0.052913	0.270883	0.927861	66	NTSR1 NRXN3 NRXN1 CRHBP SNCA TPGS1 SEZ6L NTAN1 CSTB PTEN NCSTN TMOD1 CDK5 CHRNB1	NO
GO_ADULT_LOCOMOTORY_BEHAVIOR	0.911111	1	0.0361492	0.223898	0.689239	39	NTSR1 SNCA SEZ6L NTAN1 CSTB TMOD1	NO
GO_AEROBIC_ELECTRON_TRANSPORT_CHAIN	0.0541872	0.314924	0.248911	0.577445	1.49918	18	COX6C NDUFA4 COX7B COX7C COX6A1 COX5B COX7A2L COX15	NO
GO_AEROBIC_RESPIRATION	0.0762943	0.3673	0.188204	0.375571	1.32289	78	COX6C UQCRB NDUFA4 UQCRH UQCRHL COX7B MT-ND1 COX7C COX6A1 BLOC1S1 MT-ND4 COX5B UQCRC2 DLD SLC25A14 ME3 HIF1A SUCLG1 UQCR10 PANK2 IDH1 SDHB COX7A2L COX15	NO
GO_AGGRESOME	0.387283	0.776101	0.116234	-0.301797	-1.05462	36	KLHL14 KLF8 PRKN POLD1 CABIN1 HSPA1B DVL2 BAG3 TRIM66	NO
GO_AGING	0.321387	0.726466	0.0736213	0.269998	1.07428	229	RETN BCL2A1 ARG2 KL NUAK1 PPARGC1A ADM C1QA PNPT1 IL15 GNAO1 CISD2 PLK2 RWDD1 TREX1 KYNU NAMPT ARG1 ROMO1 BRCA2 FOXO3 SNCA TRPC6 SRR POLB NQO1 CD68 ICAM1 LRRK2 MT-ATP6 MORC3 LRP1 FBXO4 PICALM LITAF PTGS2 MAPK14 SERP1 PTEN BCL6 GLRX2 NDUFS6 MT-ND4 FOS EDN1 MME CDKN1C TIMP2 TNFRSF1B CDKN2B DLD PSEN1 KCNMB1 CDKN1A CTSC NFE2L2 PRKCD CGAS HMGCR HRAS CARM1 WNT16 PPP3CA EEF1E1 CTNNA1 FOXO4 ZNF277 KRAS G…	NO
GO_ALCOHOL_BINDING	0.0677233	0.348525	0.206588	0.419579	1.36371	50	TSPO2 RPH3A RBP7 SCARB2 TRPC6 ABCA1 ADAP2 NPC2 GRAMD1B OSBPL8 STARD4 OSBPL1A STARD5	NO
GO_ALCOHOL_BIOSYNTHETIC_PROCESS	0.714286	0.959258	0.0404935	0.238938	0.892937	130	NTSR1 P2RY6 IL1B NFYB CES1 IDI1 ARV1 SNCA ASAH1 PLEK IPMK GBA TNF CYP51A1 CNBP ASAH2 IFNG KPNB1 ACAA2 SPTLC2 CACNA1H IMPA2 CD244 ACER3 MSMO1 PLCB1 SPHK1 SP1 INSIG1 EBP SC5D PTAFR HMGCS1 HMGCR IMPA1 PMVK GGPS1 LBR IPPK ASAH2B FDPS ELOVL6 SOD1 PTK2B NUS1 P2RY1 VDR DKK3	NO
GO_ALCOHOL_CATABOLIC_PROCESS	0.217523	0.608281	0.111463	0.398201	1.2001	35	NTSR1 CYP46A1 HSD3B7 AKR1C3 GK SULT1B1 SYNJ1 PTEN IMPA2	NO
GO_ALCOHOL_METABOLIC_PROCESS	0.778052	0.986659	0.0349401	0.225347	0.858945	156	AKR1C1 MYOF DPM1 CES1 AKR1C3 LEPR ARV1 DYSF GK ABCA1 CYP1B1 IPMK GBA NUDT4 NPC2 PLB1 OSBPL1A COQ3 RDH5 SYNJ1 ASAH2 DGAT2 PTEN DPM2 APOL2 CACNA1H IMPA2 GDE1 SORL1 RDH14 PLCB1 SPHK1 ITPK1 GALK1 EBP	NO
GO_ALPHA_ACTININ_BINDING	0.514851	0.857379	0.0678338	0.379038	0.955028	15	XIRP2 MYBPC3 PALLD	NO
GO_ALPHA_AMINO_ACID_BIOSYNTHETIC_PROCESS	0.405844	0.79039	0.120985	-0.272143	-1.0206	50	GLUD2 CAD GGT7 PHGDH PYCR3 PYCR1 SHMT1 CTH MTHFD1 ASNS ALDH18A1 AASS SERINC5 PYCR2 SHMT2 GOT1 CBS SEPHS1 PLOD3	NO
GO_ALPHA_AMINO_ACID_CATABOLIC_PROCESS	0.105763	0.426744	0.287805	-0.353596	-1.3246	53	GLDC GPT2 ALDH8A1 NOS3 ALDH7A1 BCAT2 SARDH HYKK HAAO GLUD2 GCAT SHMT1 KYAT1	NO
GO_ALPHA_AMINO_ACID_METABOLIC_PROCESS	0.449782	0.823829	0.135002	-0.231917	-0.987244	121	GLDC GPT2 NOS3 GAMT ALDH7A1 GNMT HYKK PFAS HAAO GLUD2 CAD GGT7 PHGDH PYCR3 GCAT PYCR1 SHMT1 KYAT1 CTH MTHFD1 ASNS ALDH18A1 NIT2	NO
GO_ALPHA_BETA_T_CELL_ACTIVATION	0.244186	0.648433	0.0946646	0.306175	1.12907	118	ARG2 RSAD2 ANXA1 IL15 LILRB1 SEMA4A CLEC4A LGALS9 BCL3 BATF HMGB1 LOXL3 IL23R PRDM1 NFKBIZ ELF4 CD160 IL18R1 CD55 IL18 TWSG1 SH3RF1 BCL6 IFNG RIPK2 CCR2 CD300A SOCS1 MYB	YES
GO_ALPHA_BETA_T_CELL_DIFFERENTIATION	0.693029	0.949181	0.0441523	0.247342	0.880981	88	RSAD2 ANXA1 SEMA4A LGALS9 BCL3 BATF HMGB1 LOXL3 IL23R PRDM1 NFKBIZ IL18R1 IL18 SH3RF1 BCL6 IFNG RIPK2 SOCS1 MYB	YES
GO_ALPHA_BETA_T_CELL_LINEAGE_COMMITMENT	0.6525	0.933107	0.0768737	-0.305441	-0.8708	17	ZFPM1 IRF4 IL23A FOXP3	NO
GO_ALPHA_BETA_T_CELL_PROLIFERATION	0.092145	0.396729	0.179782	0.469724	1.36	29	ARG2 IL15 LGALS9 ELF4 CD55 IL18 TWSG1 SH3RF1 RIPK2 CCR2	NO
GO_ALPHA_TUBULIN_BINDING	0.176744	0.552122	0.127505	0.441851	1.25377	27	PPARGC1A DYSF SNCA WASHC1 TTLL7 SPAST ARL8B FAM110C BBS4 ARL8A TAOK1 FNTA NDEL1	NO
GO_ALTERNATIVE_MRNA_SPLICING_VIA_SPLICEOSOME	0.443983	0.819889	0.0664364	0.299361	1.01905	63	RBFOX2 MBNL3 SLU7 RSRC1 RBM11 SCNM1 RBM8A MAGOH FMR1 RBM7	NO
GO_AMEBOIDAL_TYPE_CELL_MIGRATION	0.844215	1	0.0273075	0.208848	0.838746	264	SEMA3D NRP1 ANXA3 SEMA3A DOCK1 SLC8A1 PLPP3 ANXA1 PDCD10 TACSTD2 PLK2 SEMA3C SEMA6B SEMA4A S100P ADIPOR1 PTPRG SRGAP2 STARD13 GLUL CYP1B1 P2RY12 HMGB1 PLEKHG5 ANLN ADTRP ACVR1C PTPRM SDC4 SVBP DOCK5 FBXW7 KLF4 CTSH ZEB2 PTGS2 SASH1 ADAM9 GRN PDGFB PTEN EFNA1 SEMA5A IFNG GLIPR2 SEMA3B RTN4 PKN2 ZFAND5 EDN1 KANK2 TEK BAG4 AMOTL1 ROBO1 DDR2 SP1 TGFBR1 RAB11A SP100	NO
GO_AMIDE_BINDING	0.889401	1	0.0248494	0.203679	0.812464	236	FOLR3 MSR1 DBI ACHE C1QA CRHBP FPR2 MGST1 TMEM158 LEPR FZD5 TLR4 PRLR SRP14 FBXO2 ANXA5 FOLR2 TLR2 LDLRAD3 CD36 CD14 PPP3R1 NQO2 CALCRL TLR6 CD300LF PPIG TAP1 LRP1 TLR1 CD1D PICALM NOD2 PPIF PSAP PANK1 LILRB2 KPNB1 RANBP6 CLTB SLC40A1 MTHFS MME SORL1 TPP1 PGRMC1 NFKBIA ACBD5 ITGAM PPWD1 CST3 DLD KDELR1 ADRB2 FCGR2B	YES
GO_AMIDE_TRANSMEMBRANE_TRANSPORTER_ACTIVITY	0.143722	0.49498	0.141225	0.418968	1.27366	37	TOMM7 AQP9 TAP2 TIMM17A SLC15A4 TAP1 SLC14A1 SLC15A3 SEC61G TIMM23 MCL1	NO
GO_AMINE_BIOSYNTHETIC_PROCESS	0.279412	0.683532	0.127505	-0.397032	-1.118	16	PAOX MOXD1 SMOX SRM AGMAT	NO
GO_AMINE_CATABOLIC_PROCESS	0.0784314	0.370625	0.252961	-0.50483	-1.42154	16	PAOX CHDH ALDH7A1 SARDH HAAO SMOX KYAT1	NO
GO_AMINE_METABOLIC_PROCESS	0.478375	0.837492	0.0602484	0.274227	0.992827	99	PSMA4 MAOA SAT1 PSMA3 PSMA6 HNMT PSMC6 KYNU HPRT1 PSMA2 SIRT4 SLC7A7 SNCA PSMB9 NQO1 SULT1B1 ODC1 PSMC2 PSMB1 SAT2 GDE1 AMD1 PSME2 OAZ1 ITGAM PSMB8 PSME1 OAZ2 ATP7A PSMD10 PSMA1 AZIN1 PSMD9 PSMB7 SLC7A11 PSMF1 SMS PSMD13 PSMB10	NO
GO_AMINE_TRANSPORT	0.0518666	0.308984	0.321776	0.477558	1.45964	38	SLC18A1 NTSR1 FFAR3 ADRA2A SLC22A16 AQP9 ARG1 SNCA P2RX7 RGS2 P2RY12	NO
GO_AMINOGLYCAN_BIOSYNTHETIC_PROCESS	0.519231	0.860769	0.0585938	0.27877	0.971159	73	GALNT5 IL1B HAS3 VCAN B4GALT5 CHSY1 ST3GAL4 SDC4 B4GAT1 B3GNT5 EGF CHST7 ST3GAL6 PDGFB B4GALT6 AP2A1 SLC35D2 CHST15 CSGALNACT2 DSE DSEL	NO
GO_AMINOGLYCAN_CATABOLIC_PROCESS	0.0780388	0.36985	0.287805	-0.40355	-1.41259	37	SDC1 FGF2 HSPG2 GPC2 OVGP1 AGRN LYG1	NO
GO_AMINOGLYCAN_METABOLIC_PROCESS	0.213225	0.603144	0.105521	0.331294	1.172	83	GALNT5 FOXC1 IL1B HAS3 IL15 VCAN B4GALT5 CHSY1 ITIH1 ST3GAL4 HGF SDC4 B4GAT1 B3GNT5 EGF CHST7 ST3GAL6 PDGFB B4GALT6 AP2A1 SLC35D2 CHST15 CSGALNACT2 DSE B3GAT1 DSEL	NO
GO_AMINOPEPTIDASE_ACTIVITY	0.953243	1	0.0348652	0.208094	0.62281	34	MMP14 CTSH METAP1D ANPEP METAP2 NPEPPS NPEPL1 LTA4H AOPEP PRCP	NO
GO_AMINO_ACID_ACTIVATION	0.606509	0.911679	0.0899861	-0.277872	-0.92105	30	MARS2 SARS2 AIMP2 VARS2 AARS2 NARS2 LARS2 FARSA AARSD1 EARS2 FARSB DALRD3 QRSL1 GATB TARS2 WARS2	NO
GO_AMINO_ACID_BINDING	0.091716	0.396146	0.257206	-0.401116	-1.32956	30	GLDC NOS3 GNMT GLUD2 GRIN3A CAD GCHFR SHMT1	NO
GO_AMINO_ACID_TRANSMEMBRANE_TRANSPORT	0.0910426	0.3943	0.17822	0.419091	1.33722	46	NTSR1 SLC1A7 SLC1A3 SLC7A7 RGS2 SLC1A5 SLC15A4 SLC38A5 SLC6A12 ARL6IP1 SLC36A1 SLC6A6	NO
GO_AMINO_ACID_TRANSMEMBRANE_TRANSPORTER_ACTIVITY	0.256716	0.660956	0.100279	0.37909	1.15868	38	SLC1A7 SLC1A3 SLC7A7 SLC1A5 SLC15A4 SLC38A5 SLC6A12 SLC36A1 SLC6A6 SLC6A8	NO
GO_AMINO_ACID_TRANSPORT	0.442779	0.819078	0.0658312	0.288382	1.01578	78	NTSR1 SLC1A7 SLC1A3 ARG1 SLC7A7 SNCA P2RX7 RGS2 SLC1A5 SLC11A1 SLC15A4 SLC38A5 SLC6A12 ARL6IP1 SLC36A1 XK SLC6A6	NO
GO_AMINO_SUGAR_METABOLIC_PROCESS	0.0881355	0.388377	0.287805	-0.520315	-1.46514	16	FN3K MGAT3	NO
GO_AMMONIUM_ION_BINDING	0.616246	0.915566	0.0860347	-0.284041	-0.907741	27	JCHAIN PLTP PITPNM2 CHRNA7 RASGRP1 ESYT1 CHRM3 PITPNM1	NO
GO_AMMONIUM_ION_METABOLIC_PROCESS	0.639939	0.926967	0.0533478	0.292238	0.888402	37	DBI MBOAT2 PLA2G4A PLBD1 PLB1 LPCAT2 PLA2G7	NO
GO_AMMONIUM_TRANSMEMBRANE_TRANSPORTER_ACTIVITY	0.00816984	0.111834	0.38073	0.659046	1.73463	19	SLC18A1 SLC22A16 RHCE AQP1 RHD SLC22A1 SLC22A4 RHAG	NO
GO_AMMONIUM_TRANSPORT	0.0360231	0.26663	0.287857	0.448755	1.45854	50	SLC18A1 SLC22A16 RHCE LILRB1 AQP1 RHD SNCA FCER1G SLC22A1 LYN SLC22A4 TAF7 RHAG P2RX1 VAMP7 VAMP8 TOR1A EDN1 SLC6A8 DTNBP1 PSEN1	NO
GO_AMYLOID_BETA_BINDING	0.35378	0.756802	0.0795565	0.325754	1.07539	54	MSR1 ACHE C1QA FPR2 FZD5 TLR4 FBXO2 TLR2 LDLRAD3 CD36 TLR6 LRP1 PICALM LILRB2 SORL1 PGRMC1 ITGAM CST3 ADRB2 FCGR2B	NO
GO_AMYLOID_BETA_CLEARANCE	0.0452418	0.292612	0.266351	0.521512	1.46476	26	C3 MSR1 C5AR1 CD36 LRP1 PICALM CYP51A1 RAB5A MME ITGAM RAB11A HMGCR MARCO IGF1R	NO
GO_AMYLOID_BETA_FORMATION	0.678973	0.944427	0.0533478	0.306059	0.840367	24	PICALM NCSTN EFNA1 CASP3 SORL1 PSEN1 PSENEN GSAP ADAM10 PRNP ROCK1 GSK3A DYRK1A	NO
GO_AMYLOID_BETA_METABOLIC_PROCESS	0.371681	0.766285	0.120433	-0.310595	-1.05403	34	MGAT3 UNC13A ABCA7 BACE2 CHRNA7 BIN1 BACE1 SPON1	NO
GO_AMYLOID_PRECURSOR_PROTEIN_CATABOLIC_PROCESS	0.674141	0.942558	0.0503964	0.291449	0.863246	32	LYN PICALM NCSTN EFNA1 CASP3 SORL1 FLOT2 PSEN1 PSENEN GSAP ADAM10 PRNP FKBP1A ROCK1 PSEN2 GSK3A DYRK1A	NO
GO_AMYLOID_PRECURSOR_PROTEIN_METABOLIC_PROCESS	0.589506	0.901365	0.0940503	-0.254329	-0.928068	45	ITM2C UNC13A LDLRAP1 PAWR ABCA7 BACE2 CHRNA7 BIN1 NSG1	NO
GO_ANAPHASE_PROMOTING_COMPLEX	0.0809399	0.373476	0.257206	-0.469579	-1.41888	21	CDC20 UBE2C ANAPC15 ANAPC2 CUL7	NO
GO_ANAPHASE_PROMOTING_COMPLEX_DEPENDENT_CATABOLIC_PROCESS	0.80274	0.995901	0.0383996	0.229107	0.804821	77	PSMA4 PSMA3 PSMA6 RPS27A PSMC6 PSMA2 PSMB9 UBE2D1 CDC27 PSMC2 AURKA PSMB1 PSME2 PSMB8 UBE2E1 ANAPC4 PSME1 CDC26 PSMD10 PSMA1 PSMD9 PSMB7 PSMF1 PSMD13 PSMB10	NO
GO_ANATOMICAL_STRUCTURE_HOMEOSTASIS	0.927928	1	0.135002	-0.181533	-0.870621	306	PIF1 RECQL4 NEK2 JCHAIN CCN2 NOS3 ILDR2 CCNE1 TNFRSF11A BGLAP ZG16B WHRN LARGE2 NAPSA PRKN RAD51 HAAO HUS1B TLR9 XRCC3 TNKS1BP1 CD38 FLT3LG CSF1 EXO1 POLD1 SLX4 NCDN DMD CROCC XRCC1 BAG3 TSPOAP1 MYC LARGE1 PARP1 CUBN PRKCA ANKRD11 RTEL1 HSPB1 AUTS2 PML	NO
GO_ANATOMICAL_STRUCTURE_MATURATION	0.602108	0.908948	0.0497903	0.25566	0.932587	109	C3 NTN4 TBX6 C1QA FAM210B B4GALT5 DDIT3 BRCA2 FOXO3 SCLT1 CX3CR1 LTF DMC1 LRRK2 TRIM58 EPB42 MAP3K13 SLFN14 AURKA B4GALT6 FLVCR1 RBPJ CDKN1C HIF1A TAL1 CDKN1A ADGRB3 TUT7 ALDH1A2	NO
GO_ANCHORED_COMPONENT_OF_MEMBRANE	0.000880082	0.0234979	0.477271	0.509733	1.78305	76	CD177 FOLR3 EFNA5 LPL ACHE NTNG2 GAS1 ITLN1 NRN1 CEACAM8 LYPD2 ALPL FCGR3B MELTF VNN2 FOLR2 CA4 CD14 BST2 TFPI OMG TNFRSF10C PLAUR BST1 CD52 CD59 SVIP CD160 ZFAND2B CD55 RAB5A CD48	NO
GO_ANCHORED_COMPONENT_OF_PLASMA_MEMBRANE	0.0511628	0.307053	0.248911	0.520185	1.45376	25	FOLR3 EFNA5 NTNG2 GAS1 MELTF FOLR2 CA4 CD14 CD59 CD160 EFNA1	NO
GO_ANCHORING_JUNCTION	0.311493	0.717787	0.0714786	0.255218	1.05839	446	RPL23 RPL7 PGM5 MMP14 EFNA5 RPS3A XIRP2 RPS7 RPS17 RPL9 PARD3B POF1B DSC2 NRP1 B2M PLPP3 FRMD4A DLC1 RPL27 RPL31 ANXA1 FZD1 MARCKS LIN7A FAT1 NECTIN3 RPL30 FMN1 ARPC3 CNN3 TWF1 PPP1CB RPS18 AFDN ANXA5 JAK2 LAMTOR3 RHOU PALLD SCARB2 RPS29 LYN ARHGAP26 CDH1 NUMB RPL5 LRRC7 PTPRM HCK SDC4 WASF1 DLL1 ICAM1 MPZL1 CYFIP1 ARPC5 LRP1 PLAUR S100A11 RPS11 NEXN CD59 ADAM15 FLOT1 FRMD4B STARD8 ARPC2 SORBS1 R…	NO
GO_ANDROGEN_RECEPTOR_BINDING	0.889571	1	0.0714786	-0.205837	-0.734494	40	GRIP1 CCNE1	NO
GO_ANDROGEN_RECEPTOR_SIGNALING_PATHWAY	0.364217	0.762632	0.127505	-0.281067	-1.03937	48	NKX3-1 GRIP1 CCNE1 PMEPA1	NO
GO_ANIMAL_ORGAN_FORMATION	0.984615	1	0.0342688	0.184522	0.529704	28	SMARCD3 GNG5 RBPJ ROBO1 FGFR2 FRS2 MAPK1 NOTCH1 AR RDH10 NOG WNT2B PIM1	NO
GO_ANIMAL_ORGAN_MATURATION	0.272059	0.677009	0.129443	-0.401715	-1.13118	16	LEP DCHS1	NO
GO_ANIMAL_ORGAN_REGENERATION	0.295389	0.700791	0.0899861	0.344026	1.11815	50	ANXA3 ADM PNPT1 C5AR1 CEBPB GAS6 HGF AXL TGFBR3 AURKA IGF2R CDKN1A EZH2 CDK4 RAP1A LCP1	NO
GO_ANION_ANION_ANTIPORTER_ACTIVITY	0.0387592	0.274821	0.321776	0.604633	1.56976	18	SLC4A3 SLC26A8 SLC4A10 SLC4A1	NO
GO_ANION_CHANNEL_ACTIVITY	0.196375	0.578119	0.118288	0.406858	1.22619	35	ANO5 SLC26A8 CLIC2 GABRR2 BEST1 CLIC1	NO
GO_ANION_HOMEOSTASIS	0.992248	1	0.0342688	0.177181	0.495167	25	ABCA1 DGAT2 SLC12A3 SLC12A6 SLC12A9 SLC7A11 FASLG DGAT1 GPAM	NO
GO_ANION_TRANSMEMBRANE_TRANSPORT	0.112346	0.438913	0.144631	0.32195	1.22436	153	NTSR1 SLC4A3 SLC1A7 SLC26A8 SLC4A10 CLIC2 GABRR2 AQP9 SLC4A1 SLC1A3 SLC7A7 BEST1 SLC35A1 FOLR2 CLIC1 RGS2 SLC1A5 ABCA1 PRKAG2 SLC15A4 SLC38A5 SLC6A12 ARL6IP1 SLC36A1 MPC1 SLC6A6 MPC2 SLC20A1 SLC35D2 SLC6A8 SLC16A3 SLC12A3 EMB PSEN1 SLC25A14 SLC27A5 PTAFR RIPK1 ARL6IP5 SLC12A6 SLC7A5 IRS2 SLC12A9 CPT2 CLCN5 SLC7A11 SLC37A2	NO
GO_ANION_TRANSMEMBRANE_TRANSPORTER_ACTIVITY	0.285539	0.690793	0.0828962	0.28428	1.08796	163	SLC18A1 ANO5 SLC4A3 SLC1A7 SLC26A8 SLC4A10 CLIC2 GABRR2 AQP9 SLC4A1 SLC1A3 SLC7A7 BEST1 SLC35A1 CLIC1 SLC1A5 ABCA1 SLC22A1 SLCO4C1 SLC15A4 SLC38A5 SLC6A12 SLC16A6 SLC36A1 GPR89A MPC1 SLC6A6 MPC2 SLC35D2 SLC6A8 SLC16A3 SLC12A3	NO
GO_ANION_TRANSPORT	0.0609756	0.331729	0.190023	0.303669	1.24138	346	HBB FOLR3 PLSCR4 NTSR1 ANO5 SLC4A3 SLC1A7 P2RY6 CA1 ATP5PF HBA2 HBA1 IL1B AKR1C1 PLSCR1 SLC26A8 SLC4A10 CLIC2 GABRR2 AQP9 ANXA1 ACSL1 SLC4A1 AQP1 TRIAP1 SLC27A3 SLC1A3 PLA2G4A CA3 ARG1 SLC7A7 BEST1 SNCA SLC35A1 P2RX7 FOLR2 CLIC1 CA4 RGS2 CD36 SCARB2 SLC1A5 ABCA1 SLCO4C1 SLC11A1 CEBPB PRKAG2 NPC2 SLC15A4 SPX SLC38A5 RHAG OSBPL8 SLC6A12 SLC16A6 PRELID2 ATP8B4 ARL6IP1 SLC36A1 GPR89A ACSL4 PRELID1 CY…	YES
GO_ANOIKIS	0.652941	0.933107	0.0855357	-0.271533	-0.883613	29	SIK1 MYBBP1A TLE1	NO
GO_ANTERIOR_POSTERIOR_AXIS_SPECIFICATION	0.315705	0.721281	0.0922597	0.42039	1.13354	22	TBX6 FZD5 DDIT3 BASP1 ETS2 AURKA FRS2 TMED2 RNF2 TIFAB	NO
GO_ANTERIOR_POSTERIOR_PATTERN_SPECIFICATION	0.858871	1	0.0878313	-0.200535	-0.824559	96	NKX3-1 CELSR1 TCAP FUZ NKD1 HOXB4 HES1 BHLHE41 KAT2A AXIN2 LRP6 CDON	NO
GO_ANTIBACTERIAL_HUMORAL_RESPONSE	0.0813953	0.373678	0.202072	0.557382	1.43036	17	SEMG1 SLPI RPL39 DEFA4 DEFA1 CAMP RNASE3 LTF	NO
GO_ANTIBIOTIC_CATABOLIC_PROCESS	0.0355487	0.264183	0.321776	0.536344	1.5596	30	HBB HBA2 HBA1 HP AKR1C3 SNCA PRDX5 SULT1B1 PRDX6	NO
GO_ANTIBIOTIC_METABOLIC_PROCESS	0.0301548	0.244442	0.352488	0.457668	1.50443	52	HBB HBA2 HBA1 AKR1C1 HP AKR1C3 SNCA PRDX5 CYBB SULT1B1 PRDX6	NO
GO_ANTIGEN_BINDING	0.147692	0.502761	0.204295	-0.333528	-1.21284	44	HLA-DRB5 JCHAIN HLA-G HLA-DQB1 CD1A HLA-DQA1 SLAMF1	NO
GO_ANTIGEN_PROCESSING_AND_PRESENTATION	0.0685579	0.350778	0.184706	0.321136	1.26116	198	HLA-DQA2 PSMA4 LAG3 B2M PSMA3 CAPZA2 PSMA6 CTSE FCGR1A PSMC6 TREX1 IFI30 AP1S2 CLEC4A PSMA2 PSMB9 CYBB CD36 FCER1G TAP2 CAPZA1 CD68 SLC11A1 DYNC1LI1 DCTN6 KIF18A ICAM1 RAB32 AP1S1 TAP1 OSBPL1A RILP CD1D CTSS VAMP3 CTSL RAB6A VAMP8 RAB8B CTSH NOD2 PSMC2 ACTR10 ATG5 LILRB2 PSMB1 AP2A1 PSME2 ITGAV PYCARD CYBA SEC24D PSMB8 RAB27A NCF2 FCGR2B DCTN4 AP1S3 HLA-F PSME1 NCF4 RAB10 NCF1 PSMD10 CHUK PSMA1 P…	NO
GO_ANTIGEN_PROCESSING_AND_PRESENTATION_OF_ENDOGENOUS_ANTIGEN	0.82439	1	0.0450443	0.276709	0.728306	19	B2M TAP2 TAP1 CD1D ATG5 HLA-F HLA-B TAPBP CD1E	NO
GO_ANTIGEN_PROCESSING_AND_PRESENTATION_OF_EXOGENOUS_PEPTIDE_ANTIGEN_VIA_MHC_CLASS_I	0.00294542	0.056332	0.431708	0.494696	1.72459	74	PSMA4 B2M PSMA3 PSMA6 FCGR1A PSMC6 IFI30 CLEC4A PSMA2 PSMB9 CYBB CD36 FCER1G TAP2 TAP1 VAMP3 VAMP8 PSMC2 PSMB1 PSME2 ITGAV CYBA PSMB8 NCF2 HLA-F PSME1 NCF4 NCF1 PSMD10 CHUK PSMA1 PSMD9 PSMB7 PSMF1 HLA-B PSMD13 PSMB10 TAPBP	NO
GO_ANTIGEN_PROCESSING_AND_PRESENTATION_OF_PEPTIDE_ANTIGEN	0.0693431	0.352422	0.186433	0.333686	1.28277	168	HLA-DQA2 PSMA4 LAG3 B2M PSMA3 CAPZA2 PSMA6 CTSE FCGR1A PSMC6 IFI30 AP1S2 CLEC4A PSMA2 PSMB9 CYBB CD36 FCER1G TAP2 CAPZA1 SLC11A1 DYNC1LI1 DCTN6 KIF18A AP1S1 TAP1 OSBPL1A RILP CTSS VAMP3 CTSL VAMP8 PSMC2 ACTR10 PSMB1 AP2A1 PSME2 ITGAV PYCARD CYBA SEC24D PSMB8 NCF2 FCGR2B DCTN4 AP1S3 HLA-F PSME1 NCF4 NCF1 PSMD10 CHUK PSMA1 PSMD9 PSMB7 DYNLL1 PSMF1 AP2M1 HLA-B PSMD13 PSMB10 TAPBP HLA-DQB2 CENPE LGMN…	NO
GO_ANTIGEN_PROCESSING_AND_PRESENTATION_OF_PEPTIDE_ANTIGEN_VIA_MHC_CLASS_I	0.00244611	0.0497212	0.431708	0.451373	1.60718	90	PSMA4 B2M PSMA3 PSMA6 FCGR1A PSMC6 IFI30 CLEC4A PSMA2 PSMB9 CYBB CD36 FCER1G TAP2 TAP1 VAMP3 VAMP8 PSMC2 PSMB1 PSME2 ITGAV CYBA SEC24D PSMB8 NCF2 HLA-F PSME1 NCF4 NCF1 PSMD10 CHUK PSMA1 PSMD9 PSMB7 PSMF1 HLA-B PSMD13 PSMB10 TAPBP PSMD4 SEC24B CANX	NO
GO_ANTIGEN_PROCESSING_AND_PRESENTATION_OF_PEPTIDE_OR_POLYSACCHARIDE_ANTIGEN_VIA_MHC_CLASS_II	0.535666	0.869522	0.0561767	0.269286	0.958757	89	HLA-DQA2 LAG3 CAPZA2 CTSE IFI30 AP1S2 FCER1G CAPZA1 DYNC1LI1 DCTN6 KIF18A AP1S1 OSBPL1A RILP CTSS CTSL ACTR10 AP2A1 PYCARD SEC24D FCGR2B DCTN4 AP1S3	NO
GO_ANTIGEN_RECEPTOR_MEDIATED_SIGNALING_PATHWAY	0.786207	0.989486	0.127505	-0.19085	-0.888198	218	HLA-DRB5 CACNB3 PAX5 HLA-DQB1 ICOSLG CD22 CD19 BLK GCSAML CD79A HLA-DQA1 PAWR CD38 CD79B PLCG1 TESPA1 ADA BTNL9 UBASH3A ZAP70 BTNL3 CEACAM1 SH2B2 CCR7 CARD11 ABL1 FOXP3	NO
GO_ANTIMICROBIAL_HUMORAL_IMMUNE_RESPONSE_MEDIATED_BY_ANTIMICROBIAL_PEPTIDE	0.000214734	0.00800552	0.518848	0.677243	1.94415	28	SEMG1 S100A12 RPL39 DEFA4 S100A9 RPL30 CXCL10 ROMO1 PPBP DEFA1 CAMP RNASE3 PGLYRP1 LTF CXCL1 ELANE CXCL5 DEFA3	NO
GO_ANTIMICROBIAL_HUMORAL_RESPONSE	3.95561e-05	0.00207798	0.557332	0.61852	1.99674	48	S100A8 SEMG1 S100A12 SLPI RPL39 DEFA4 S100A9 ITLN1 PI3 LCN2 RPL30 CXCL10 ROMO1 PPBP LYZ DEFA1 BCL3 CAMP RNASE3 PGLYRP1 SLC11A1 LTF BPI CXCL1	NO
GO_ANTIOXIDANT_ACTIVITY	0.119149	0.452569	0.151149	0.378839	1.26563	59	HBB S100A9 HBA2 HBA1 HP CLIC2 MGST1 TXN PRDX5 NQO1 PRDX6 MGST3 PTGS2 PRXL2C SRXN1	NO
GO_ANTIPORTER_ACTIVITY	0.472103	0.835188	0.0650878	0.300506	0.997102	58	SLC4A3 SLC26A8 SLC8A1 SLC4A10 SLC4A1 SLC35E4 SLC22A4 SLC11A1 SLC24A4	NO
GO_AORTA_DEVELOPMENT	0.126844	0.466271	0.216543	-0.372899	-1.26547	34	NKX3-1 LEP EFNB2 HES1 ENG TAB1 ADAMTS6 PRICKLE1 PLXND1 CHD7 SRF	NO
GO_AORTA_MORPHOGENESIS	0.816176	0.99833	0.0646485	-0.275818	-0.77667	16	EFNB2 HES1 ENG	NO
GO_AORTIC_VALVE_DEVELOPMENT	0.343434	0.74748	0.11524	-0.37995	-1.05297	15	NOS3 EMILIN1	NO
GO_APICAL_JUNCTION_ASSEMBLY	0.900289	1	0.035542	0.223861	0.706393	43	POF1B FZD5 MARVELD2 AFDN TNF PRKCI PKN2 PARD3 APC GPBAR1 F11R RHOC CTNNA1	NO
GO_APICAL_JUNCTION_COMPLEX	0.312236	0.718019	0.161979	-0.25925	-1.05577	95	SYNPO SAPCD2 AOC1 CCDC85C CGN TJP3 PLEKHA7 CCND1 EPPK1 CLDN7 FRMD6 WNK3 CLDN15 PLXDC1 SYMPK SHROOM1 NECTIN2 JAM3 TJAP1 MXRA8	NO
GO_APICAL_PART_OF_CELL	0.461176	0.831127	0.0568864	0.255183	1.00413	206	SLC25A27 P2RY6 PARD3B KL DYNC2LI1 MYO6 ANXA1 MGST1 FAT1 AQP1 C5AR1 IFIT5 KCNMA1 SNX10 MARVELD2 EDA ABCC6 CA4 CD36 BST2 MGAM SRR SLC22A4 GM2A NUMB PLB1 DRAM2 DLL1 LRP1 SVBP VAMP3 VAMP7 AJAP1 PRKCI STX3 PTEN STXBP3 KCNE1 AP2A1 ADCY10 ATP6V1C1 TEK ATP6V1E1 PLD1 ATP1B2 SLC12A3 AMOTL1 CYBA ITPK1 DDR2 RAB27A ADRB2 NHS PARD3 CNKSR3 TMEM30A FZD3 TCIRG1	NO
GO_APICAL_PLASMA_MEMBRANE	0.748148	0.973543	0.036839	0.228032	0.86921	161	P2RY6 PARD3B KL ANXA1 FAT1 AQP1 KCNMA1 MARVELD2 ABCC6 CA4 CD36 BST2 MGAM SLC22A4 GM2A PLB1 DRAM2 DLL1 VAMP3 AJAP1 PRKCI STX3 PTEN STXBP3 KCNE1 AP2A1 ADCY10 TEK ATP6V1E1 PLD1 ATP1B2 SLC12A3 AMOTL1 CYBA ITPK1 DDR2 RAB27A ADRB2 NHS PARD3 CNKSR3 TMEM30A FZD3 TCIRG1 CD9	NO
GO_APOPTOTIC_CELL_CLEARANCE	0.170953	0.542783	0.128143	0.407602	1.23911	37	C3 C4A TREX1 CD36 MERTK HMGB1 GAS6 CD300LF FCN1 AXL LRP1	NO
GO_APOPTOTIC_DNA_FRAGMENTATION	0.180488	0.557156	0.129443	0.480933	1.26583	19	HMGB2 DNASE1L3 HMGB1 PAM16 KPNB1 CASP3	NO
GO_APOPTOTIC_MITOCHONDRIAL_CHANGES	0.778068	0.986659	0.0376143	0.231042	0.837866	100	BNIP3L BLOC1S2 TRIAP1 BAD ATG3 PMAIP1 PPP3R1 GZMB GGCT HIGD1A HGF PLAUR PRELID1 TNFSF10 PAM16 PPIF HK2 TFDP1 ACAA2 BID RHOT1 CASP8 PYCARD	NO
GO_APOPTOTIC_PROCESS_INVOLVED_IN_DEVELOPMENT	0.495935	0.848371	0.0689567	0.372555	0.980576	19	FOXC1 FZD5 SPI1 TNFRSF1A TNFRSF1B BCL2L11	NO
GO_APOPTOTIC_SIGNALING_PATHWAY	0.014722	0.161165	0.38073	0.314522	1.30962	474	S100A8 CASP5 RPL26 INHBB LY96 BCL2A1 RPS7 S100A9 RPL11 HMGB2 NRP1 TPT1 IL1B TCF7L2 LGALS3 ATF3 BNIP3L LCN2 GZMH SORT1 STRADB ST18 SELENOK PDCD10 YBX3 BLOC1S2 STK3 TRIAP1 TLR4 CASP1 SRGN TLR3 BAD DDIT3 SIAH2 NBN BRCA2 FAS FOXO3 G0S2 P2RX7 LGALS9 JAK2 BCL3 HINT1 PMAIP1 DNAJA1 CD14 PPP3R1 CX3CR1 CYP1B1 GZMB POLB IFI16 CEBPB GGCT HIGD1A TNFRSF12A HGF ICAM1 LRRK2 TNFRSF10C PLAUR SGK3 TYROBP CASP4 RRM2…	NO
GO_APPENDAGE_DEVELOPMENT	0.898936	1	0.031637	0.208315	0.748258	94	MAP3K20 SEMA3C FMN1 KAT2B FBN2 BBS7 ZNF141 CYP26B1 LNPK ASPH TMEM107 SLC39A1 PLXNA2	NO
GO_APPENDAGE_MORPHOGENESIS	0.963215	1	0.0294228	0.192368	0.677585	78	MAP3K20 SEMA3C FMN1 FBN2 ZNF141 CYP26B1 LNPK ASPH TMEM107 PLXNA2 FLVCR1 PSEN1 BCL2L11 ALDH1A2 FGFR2 HDAC2 SFRP2 IFT52 ECE1 TMEM231 NOTCH1 BAX SOX4 RDH10 NIPBL FZD6 NOG MBNL1	NO
GO_AP_TYPE_MEMBRANE_COAT_ADAPTOR_COMPLEX	0.455202	0.827989	0.0673624	0.321171	1.01345	43	AP3B2 AP1S2 AP5B1 AP1S1 PICALM AP3S1 FCHO2 AP2A1	NO
GO_ARACHIDONIC_ACID_METABOLIC_PROCESS	0.56	0.883291	0.0603786	0.324144	0.930515	28	AKR1C3 DAGLA PTGDS PLA2G4A CYP1B1 PTGS2 PNPLA8 TBXAS1 PTGES3	NO
GO_ARF_GUANYL_NUCLEOTIDE_EXCHANGE_FACTOR_ACTIVITY	0.975	1	0.0571259	-0.189387	-0.539935	17	PSD	NO
GO_ARF_PROTEIN_SIGNAL_TRANSDUCTION	0.3475	0.751678	0.113787	-0.370919	-1.05748	17	PSD ARFGAP1 CYTH3 MAPRE2	NO
GO_ARP2_3_COMPLEX_MEDIATED_ACTIN_NUCLEATION	0.215361	0.605102	0.111918	0.413223	1.20985	31	GMFG ARPC3 WASF1 CYFIP1 WASHC1 ARPC5 ARPC2 AP1AR GMFB BRK1 ACTR2 ARPC4 IQGAP2 ACTR3 ARPC1A ARPC5L	NO
GO_ARTERY_DEVELOPMENT	0.116883	0.448357	0.237794	-0.334521	-1.25453	50	WNT11 NKX3-1 LEP HOXA1 EFNB2 HES1 ENG	NO
GO_ARTERY_MORPHOGENESIS	0.498498	0.849538	0.102449	-0.288492	-0.964113	32	WNT11 HOXA1 EFNB2 HES1 ENG	NO
GO_ASPARTATE_FAMILY_AMINO_ACID_BIOSYNTHETIC_PROCESS	0.99187	1	0.0365315	0.170776	0.449488	19	ASNSD1 PLOD2 APIP	NO
GO_ASPARTATE_FAMILY_AMINO_ACID_CATABOLIC_PROCESS	0.378788	0.770335	0.10882	-0.371954	-1.03081	15	ALDH7A1 HYKK GCAT PHYKPL AASS GCDH DLST GOT1 PIPOX	NO
GO_ASPARTATE_FAMILY_AMINO_ACID_METABOLIC_PROCESS	0.387283	0.776101	0.116234	-0.301047	-1.052	36	ALDH7A1 GNMT HYKK PHGDH GCAT MTHFD1 ASNS NIT2 PHYKPL AASS GCDH DLST GOT1 PIPOX	NO
GO_ASPARTIC_TYPE_PEPTIDASE_ACTIVITY	0.790404	0.991375	0.067676	-0.286315	-0.793476	15	NAPSA SPPL2B BACE2	NO
GO_ASSOCIATIVE_LEARNING	0.504615	0.850897	0.103197	-0.264415	-0.961519	44	SYNPO TNR RAG1 SYNGAP1 PDE1B	NO
GO_ASTROCYTE_DEVELOPMENT	0.0272723	0.230339	0.352488	0.56847	1.5887	25	S100A8 IL1B C1QA FPR2 TLR4 C5AR1 TSPAN2 DLL1 LRP1 TNF GRN	NO
GO_ASTROCYTE_DIFFERENTIATION	0.0200851	0.192559	0.352488	0.469741	1.51644	48	S100A8 S100B IL1B SOX6 C1QA FPR2 TLR4 C5AR1 TSPAN2 DLL1 LRP1 GCM1 TNF GRN	NO
GO_ATPASE_ACTIVATOR_ACTIVITY	0.04368	0.288779	0.321776	0.538121	1.47756	24	MYBPC3 DNAJB4 DNAJA1 ATP1B3 DNAJC19 DNAJC1 ATP1B2 NCAPH TOR1AIP1 DNAJB6 ATP1B1 DNAJC15 DNAJA2 TOR1AIP2	NO
GO_ATPASE_ACTIVITY	0.982475	1	0.0155349	0.180126	0.740692	366	DNAH14 AK6 MYO10 ATP5PF ABCA13 ABCG2 DSCC1 MYL6 DDX43 DYNC2LI1 ANXA1 TNNT1 PSMC6 ATP6V1G1 RFC4 NBN KIF20B ANXA5 ABCC6 ATP5MG DNAH17 ABCA1 TDRD9 ATP5F1C ATP5ME TAP2 ATP1B3 DMC1 FIGNL2 ABCA11P KIF18A MT-ATP6 TAP1 HSPA14 ATP5F1E KIF14 ATP5PO SMCHD1 ATAD5 HSPA6 KATNA1 ATP8B4 PSMC2 ATP5PB ATP6V1B2 CDK7 DHX32 TOR1A MT-ATP8 BRIP1 ABCB10 ATP5F1D ATP6V1C1 SPAST ATP6V1E1 KIF1B ATP1B2 ATP8B3 KIF13A ATP6V0E1…	NO
GO_ATPASE_ACTIVITY_COUPLED	0.805369	0.995901	0.0285039	0.213588	0.86687	297	DNAH14 MYO10 ABCA13 ABCG2 DSCC1 MYL6 DDX43 DYNC2LI1 ANXA1 TNNT1 PSMC6 ATP6V1G1 RFC4 NBN KIF20B ANXA5 ABCC6 ATP5MG DNAH17 ABCA1 TDRD9 ATP5F1C TAP2 ATP1B3 DMC1 FIGNL2 ABCA11P KIF18A MT-ATP6 TAP1 HSPA14 ATP5F1E KIF14 ATP5PO ATAD5 HSPA6 KATNA1 ATP8B4 PSMC2 ATP5PB ATP6V1B2 CDK7 DHX32 BRIP1 ABCB10 ATP5F1D ATP6V1C1 SPAST ATP6V1E1 KIF1B ATP1B2 ATP8B3 ATP6V0E1 ATP6V1F DNA2 KIF19 DNAH6 CHD1 TMEM30A ATP9A A…	NO
GO_ATPASE_ACTIVITY_COUPLED_TO_MOVEMENT_OF_SUBSTANCES	0.259502	0.662285	0.0919686	0.308331	1.1163	99	ABCA13 ABCG2 ATP6V1G1 ANXA5 ABCC6 ATP5MG ABCA1 ATP5F1C TAP2 ATP1B3 ABCA11P MT-ATP6 TAP1 ATP5F1E ATP5PO ATP8B4 ATP5PB ATP6V1B2 ABCB10 ATP5F1D ATP6V1C1 ATP6V1E1 ATP1B2 ATP8B3 ATP6V0E1 ATP6V1F TMEM30A ATP9A ATP6V1D TCIRG1 ATP11B LMBRD1 ABCC4 ATP6V0B ATP5PD ATP7A ATP6V0C	NO
GO_ATPASE_ACTIVITY_COUPLED_TO_TRANSMEMBRANE_MOVEMENT_OF_IONS_PHOSPHORYLATIVE_MECHANISM	0.689295	0.948297	0.0762797	-0.282426	-0.85338	21	FXYD2 ATP2C2 ATP2A3 ATP6V1G2	NO
GO_ATPASE_ACTIVITY_COUPLED_TO_TRANSMEMBRANE_MOVEMENT_OF_IONS_ROTATIONAL_MECHANISM	0.0677711	0.348549	0.2114	0.477636	1.38889	30	ATP5MG ATP5F1C MT-ATP6 ATP5F1E ATP5PO ATP5PB ATP6V1B2 ATP5F1D ATP6V1C1 ATP6V1E1 ATP6V0E1 ATP6V1F ATP6V1D TCIRG1 ATP6V0B ATP5PD ATP6V0C ATP6V1A ATP6AP1	NO
GO_ATPASE_BINDING	0.473611	0.835501	0.0635008	0.2947	1.00051	64	ATP6V1G1 SNX10 GABARAPL2 TRPC6 ABCA1 ATP1B3 RALB SVIP VCPKMT TAF9 ADCY10 ATP6V1E1 ATP1B2 CHMP4A USP25 TCIRG1 PKD2 NOP58 TOR1AIP1 RAC1 ATP1B1	NO
GO_ATPASE_COMPLEX	0.197674	0.580256	0.197822	-0.291375	-1.17026	84	FXYD2 MTA1 DPF3 ABCA7 CHD3 ABCB8 SMARCA1 SMARCC2 SMARCB1 ABCA2 INO80B SRCAP ABCD4 TRRAP RUVBL1 MTA3 SMARCA4 ACTL6A NFRKB INO80E RUVBL2 ACTR5 CHD4 BICRA MTA2 SMARCD2 SLC9A1 GATAD2B DPF2 HDAC1 ARID1B BRD8 EP400 BPTF NCR1 MCRS1	NO
GO_ATPASE_REGULATOR_ACTIVITY	0.151286	0.508688	0.137251	0.415453	1.26298	37	MYBPC3 BAG1 DNAJB4 DNAJA1 ATP1B3 DNAJC19 DNAJC1 ATP1B2 NCAPH FNIP1 TOR1AIP1 FNIP2 DNAJB6 ATP1B1 DNAJC15 DNAJA2 TOR1AIP2	NO
GO_ATP_BIOSYNTHETIC_PROCESS	0.0335833	0.260409	0.321776	0.495862	1.53096	40	ATP5PF PPARGC1A ATP5MG ATP5F1C ATP5ME PRKAG2 PID1 MT-ATP6 ATP5F1E ATP5PO ATP5PB MT-ATP8 ATP5F1D COX5B UQCC3	NO
GO_ATP_DEPENDENT_CHROMATIN_REMODELING	1	1	0.0689567	-0.133742	-0.515868	57	CENPK SMARCA1 SMARCC2 SMARCB1 CENPU SRCAP HJURP RUVBL1 SMARCA4 RNF8 ACTL6A CENPC CHD4 MTA2 SMARCD2 GATAD2B HDAC1 CENPX	NO
GO_ATP_DEPENDENT_DNA_HELICASE_ACTIVITY	0.0127699	0.146745	0.38073	-0.472994	-1.65567	37	PIF1 RECQL4 CHD3 DDX11 ERCC2 MCM4 MCM7 RTEL1 RUVBL1 RUVBL2 CHD4 DHX30 DHX36 IGHMBP2 BLM HELB	NO
GO_ATP_DEPENDENT_MICROTUBULE_MOTOR_ACTIVITY	0.350453	0.753474	0.0831291	0.382327	1.10696	29	DNAH14 DYNC2LI1 KIF20B DNAH17 KIF18A KIF14 KIF1B KIF19 DNAH6 DNAH7 DYNLL1	NO
GO_ATP_DEPENDENT_MICROTUBULE_MOTOR_ACTIVITY_PLUS_END_DIRECTED	0.70598	0.95505	0.0531298	0.323764	0.830848	17	KIF20B KIF18A KIF14 KIF1B KIF19 DYNLL1	NO
GO_ATP_HYDROLYSIS_COUPLED_CATION_TRANSMEMBRANE_TRANSPORT	0.258493	0.661022	0.0992333	0.364659	1.14934	44	ANXA5 ATP5MG ATP5F1C MT-ATP6 ATP5F1E P2RX1 ATP5PO ATP5PB ATP6V1B2 ATP5F1D ATP6V1C1 ATP6V1E1 ATP6V0E1 ATP6V1F TCIRG1 ATP6V0B ATP5PD ATP7A ATP6V0C	NO
GO_ATP_HYDROLYSIS_COUPLED_TRANSMEMBRANE_TRANSPORT	0.722955	0.962979	0.0743625	-0.265317	-0.834028	24	FXYD2 ATP6V0E2	NO
GO_ATP_METABOLIC_PROCESS	0.963415	1	0.0348652	0.20559	0.6213	36	BAD AK1 NADK ATP6V1B2 AK4 GUK1 ENPP3 ATP1B1 ATP6V1A OLA1 FAM20C HSPA8 CLPX ENTPD5 TSPO	NO
GO_ATP_SYNTHESIS_COUPLED_ELECTRON_TRANSPORT	1.73379e-05	0.00103899	0.57561	0.533183	1.89848	90	NDUFB3 COX6C UQCRB NDUFA4 NDUFA5 NDUFB1 NDUFA1 UQCRH UQCRHL NDUFA6 UQCRQ COX7B SNCA NDUFS5 NDUFA3 MT-ND1 MT-ND2 NDUFA2 NDUFS4 COX7C COX6A1 NDUFAB1 NDUFB6 NDUFS6 MT-ND4 BID MT-ND4L COX5B UQCRC2 NDUFB5 COA6 DLD UQCC3	NO
GO_ATTACHMENT_OF_SPINDLE_MICROTUBULES_TO_KINETOCHORE	0.135294	0.481535	0.208955	-0.384836	-1.25232	29	KIF2C NEK2 SGO1 MAD1L1 RCC2 SEH1L CDT1 SPAG5 CENPC	NO
GO_AUTONOMIC_NERVOUS_SYSTEM_DEVELOPMENT	0.307494	0.714629	0.124434	-0.377132	-1.09974	19	NTRK1 TP63 PLXNA3 HES1 NRP2 ADARB1 SOX8	NO
GO_AUTOPHAGOSOME	0.0189516	0.188121	0.352488	0.431112	1.52391	81	PEG3 WDFY3 RAB23 C9orf72 MEFV RAB24 GABARAPL2 VMP1 CALCOCO2 LRRK2 WASHC1 OPTN FTH1 FTL PIP4K2A SH3GLB1 ATG5 NCOA4 RAB12 MAP1LC3B GABARAP WIPI1 NRBF2 TRIM21 MAP1LC3B2 LAMP2 TBC1D17 ATG12	NO
GO_AUTOPHAGOSOME_MATURATION	0.497738	0.84937	0.0650878	0.326411	0.976923	34	GABARAPL2 CALCOCO2 MCOLN1 VAMP8 MAP1LC3B GABARAP ADRB2 RUBCN LAMP2 SNAPIN CHMP3 SNX14 GABARAPL1 SNAP29	NO
GO_AUTOPHAGOSOME_MEMBRANE	0.175385	0.550542	0.127505	0.436255	1.25235	28	WDFY3 GABARAPL2 VMP1 CALCOCO2 SH3GLB1 MAP1LC3B GABARAP WIPI1 MAP1LC3B2 LAMP2	NO
GO_AUTOPHAGOSOME_ORGANIZATION	0.101604	0.417853	0.159647	0.354382	1.26719	91	NPRL3 RAB33B RAB23 C9orf72 GABARAPL2 VMP1 ATG3 GBA RALB LRRK2 EMC6 RB1CC1 RAB5A PIP4K2A SH3GLB1 ATG5 MAP1LC3B GABARAP WIPI1 CHMP4A FEZ2 PSEN1 MAP1LC3B2 UBXN2B SCFD1 WDR45 STX12 ATG12 RAB1A TRAPPC8 PINK1 ATG101 TBC1D14 FEZ1 NSFL1C SMURF1 ULK2 RAB7A RAB3GAP2 BECN1 GABARAPL1 CHMP4B SYNPO2	NO
GO_AUTOPHAGY_OF_MITOCHONDRION	0.0686813	0.350778	0.199915	0.387142	1.34011	70	TOMM7 PPARGC1A BNIP3L CISD2 FZD5 FBXO7 GABARAPL2 ATG3 GBA OPTN FBXW7 RB1CC1 ATG5 HK2 MAP1LC3B GABARAP WIPI1 MAP1LC3B2 HIF1A WDR45 ATG12 USP30 TIGAR PINK1 CTSK CAMKK2 FUNDC2 SMURF1 BECN1 GABARAPL1 PARK7 TSPO GSK3A FIS1 HAX1 FUNDC1	NO
GO_AU_RICH_ELEMENT_BINDING	0.888889	1	0.0642141	-0.23424	-0.713424	22	EXOSC7 CPSF1 RBMS3 ELAVL1 MEX3D KHSRP ILF3	NO
GO_AXIS_ELONGATION	0.000530131	0.0162453	0.477271	-0.726851	-2.01435	15	WNT11 NKD1 SPRY2 ESR1 PTK7 LRP6 TRIM28	NO
GO_AXIS_SPECIFICATION	0.0777126	0.368885	0.193813	0.439892	1.36715	41	CXXC4 TBX6 FZD5 DDIT3 BASP1 STIL ARL13B DLL1 ETS2 AURKA	NO
GO_AXON	0.17519	0.550404	0.104344	0.273642	1.12678	388	FGF13 SLC18A1 AP3B2 LPAR3 NTSR1 MAP1B NRG1 NEFL SPOCK1 NTNG2 IL31RA NRP1 ANXA3 SEMA3A C4A LAMP5 DTNA SPTA1 BLOC1S2 TIAM2 CRHBP DAGLA TSHZ3 EPB41L3 NECTIN3 WDFY3 FZD5 SHTN1 ROGDI LSM1 KIF20B SCN1B STAT1 C9orf72 BASP1 SNCA NGDN EPHB1 PALLD TNFRSF21 GLUL ZNF804A SCN9A CPEB4 TPGS1 LRRC7 BLVRB LRRK2 NPTXR CYFIP1 NEK3 AP1S1 ARPC5 LRP1 NEXN EXOC6 RGS10 AP3S1 RAB5A SYNJ1 BLOC1S6 STX3 ITSN1 CDK5 AURKA MAP…	NO
GO_AXONAL_FASCICULATION	0.58804	0.901203	0.0617054	0.351852	0.90293	17	NRP1 SEMA3A TNFRSF21 SEMA5A RTN4 CASP3	NO
GO_AXONAL_GROWTH_CONE	0.726979	0.965452	0.0504983	0.304819	0.813677	21	SHTN1 C9orf72 CYFIP1 LRP1 OLFM1 PARD3 TRAK2 HSP90AA1	NO
GO_AXONAL_TRANSPORT	0.372981	0.767086	0.0782955	0.335366	1.07007	46	AP3B2 NEFL BLOC1S2 AP3S1 BLOC1S6 MAP1A BLOC1S1 FMR1 SPAST KIF1B ARL8B DTNBP1 HIF1A TRAK2 AP3S2 DST SNAPIN SOD1 OPA1 RAB21	NO
GO_AXONEME_ASSEMBLY	0.224615	0.617864	0.110565	0.42064	1.20753	28	RSPH9 DNAAF4 CCDC65 UBE2B RSPH4A TPGS1 GAS8 IQCG SPAG16 SPAG1 TTC26	NO
GO_AXONEME_PART	0.485	0.842525	0.0931455	-0.341344	-0.973159	17	SAXO2	NO
GO_AXON_CYTOPLASM	0.248186	0.652314	0.100633	0.358411	1.15704	48	AP3B2 NEFL BLOC1S2 AP3S1 BLOC1S6 MAP1A BLOC1S1 FMR1 SPAST KIF1B ARL8B DTNBP1 HIF1A TRAK2 DYNLL1 AP3S2 DST SNAPIN SOD1 OPA1 RAB21	NO
GO_AXON_DEVELOPMENT	0.151111	0.508311	0.11524	0.281415	1.14781	330	FGF13 LPAR3 SEMA3D S100B EFNA5 MAP1B CDKL3 NEFL RAP1GAP FSTL4 NTNG2 NRP1 NRXN3 SEMA3A NTN4 NRXN1 CHN1 SPTA1 ISL2 SEMA3C SEMA6B SEMA4A SHTN1 B4GALT5 SPTB SCN1B FKBP1B C9orf72 RPL24 S100A6 JAK2 EPHB1 PALLD SLIT1 TNFRSF21 PTPRA OMG DOK4 NUMB TSPAN2 TNFRSF12A PTPRM RAPH1 CYFIP1 LRP1 B4GAT1 NEXN PLXNC1 PICALM FLOT1 KLF4 ZEB2 SSH2 GRN PLXNA2 DRAXIN PTEN XK FBXO45 EFNA1 MAP3K13 CDK5 SEMA5A MAP1A PLXNB2 …	NO
GO_AXON_EXTENSION	0.46988	0.834866	0.0621124	0.280422	0.999841	87	SEMA3D MAP1B CDKL3 NRP1 SEMA3A SEMA3C SEMA6B SEMA4A SHTN1 C9orf72 SLIT1 TNFRSF12A RAPH1 CYFIP1 LRP1 DRAXIN MAP3K13 CDK5 SEMA5A SEMA3B RTN4 IFRD1	NO
GO_AXON_PART	0.211316	0.599632	0.096563	0.278948	1.11662	254	FGF13 SLC18A1 AP3B2 NTSR1 NEFL SPOCK1 NRP1 LAMP5 BLOC1S2 TIAM2 CRHBP DAGLA TSHZ3 EPB41L3 SHTN1 KIF20B SCN1B C9orf72 BASP1 SNCA PALLD GLUL ZNF804A CPEB4 LRRC7 BLVRB LRRK2 NPTXR CYFIP1 AP1S1 ARPC5 LRP1 EXOC6 RGS10 AP3S1 RAB5A SYNJ1 BLOC1S6 STX3 ITSN1 CDK5 AURKA MAP1A BLOC1S1 TOR1A IQGAP1 FKBP15 FMR1 ADCY10 SPAST ABITRAM KIF1B TIMP2 TNFRSF1B ANKRD9 ARL8B CABP4 DTNBP1 OLFM1 PSEN1 ALS2 PARD3 HIF1A CTSZ	NO
GO_AXON_REGENERATION	0.886878	1	0.0382417	0.237865	0.71191	34	NEFL FKBP1B JAK2 LRP1 KLF4 GRN PTEN SPP1	NO
GO_AXO_DENDRITIC_TRANSPORT	0.472934	0.835501	0.0647943	0.301539	0.995555	56	AP3B2 NEFL BLOC1S2 WASF1 AP3S1 BLOC1S6 MAP1A BLOC1S1 FMR1 SPAST KIF1B ARL8B DTNBP1 FLOT2 HIF1A TRAK2 AP3S2 SPG11 DST SNAPIN SOD1 OPA1 RAB21 HSPA8 ARL8A	NO
GO_AZUROPHIL_GRANULE	4.18962e-06	0.000333097	0.610527	0.496427	1.86576	142	RETN C3 ORM2 DEFA4 ABCA13 CEACAM8 C3AR1 MGST1 GCA STOM RNASE2 ARG1 FPR1 CREG1 LYZ DEFA1 MNDA RNASE3 BST2 GM2A SLCO4C1 CD68 CMTM6 NPC2 PRDX6 TMEM179B GNS DNAJC3 BPI FUCA2 NFAM1 VAMP7 VAMP8 GLIPR1 PADI2 FTL GRN STX3 ELANE PSAP NCSTN ACTR10 CPPED1 CD63 PRSS57 CKAP4 GAA DEFA3 CCT2 PYCARD RAP1B PSEN1 SYNGR1 LAMP2 VNN1 ADA2 TMEM30A CTSC BRI3 VAPA HEXB RNASET2 ATP11B PRKCD RAB3D GDI2 ACTR2 ATP6V0C DNAJC…	NO
GO_AZUROPHIL_GRANULE_LUMEN	0.0127347	0.146693	0.38073	0.444663	1.57487	82	RETN C3 ORM2 GCA RNASE2 ARG1 CREG1 LYZ DEFA1 MNDA RNASE3 GM2A NPC2 PRDX6 GNS DNAJC3 BPI FUCA2 PADI2 FTL GRN ELANE ACTR10 CPPED1 PRSS57 DEFA3 CCT2 PYCARD ADA2 CTSC HEXB RNASET2 PRKCD GDI2 ACTR2 SDCBP NHLRC3 PA2G4 CAP1 C6orf120	NO
GO_AZUROPHIL_GRANULE_MEMBRANE	0.000348133	0.0117793	0.498493	0.567432	1.87322	54	ABCA13 CEACAM8 C3AR1 MGST1 STOM FPR1 BST2 SLCO4C1 CD68 CMTM6 TMEM179B NFAM1 VAMP7 VAMP8 GLIPR1 PSAP NCSTN CD63 CKAP4 GAA RAP1B PSEN1 SYNGR1 LAMP2 VNN1 TMEM30A BRI3 VAPA ATP11B RAB3D ATP6V0C DNAJC13	NO
GO_A_BAND	0.772213	0.984432	0.0477342	0.292349	0.780389	21	MYBPC3 MYL4 LRRC39 KAT2B CMYA5 PPP2R5A KCTD6 DST PPP1R12A	NO
GO_BARBED_END_ACTIN_FILAMENT_CAPPING	0.724138	0.963849	0.0514265	0.310968	0.807343	18	CAPZA2 TWF1 CAPZA1	NO
GO_BASAL_PART_OF_CELL	0.805882	0.995901	0.0743625	-0.235095	-0.807028	35	MUC20 MYO1A LDLRAP1 MYO1C MET CEACAM1	NO
GO_BASAL_PLASMA_MEMBRANE	0.47619	0.836679	0.0975449	-0.320379	-0.988916	23	MUC20 MYO1A LDLRAP1 MYO1C MET CEACAM1	NO
GO_BASAL_TRANSCRIPTION_MACHINERY_BINDING	0.995745	1	0.0297775	0.158637	0.52524	55	ELOF1 GTF2B TAF7 RTRAF GTF2E2	NO
GO_BASEMENT_MEMBRANE	0.0791542	0.371883	0.287805	-0.368399	-1.35235	46	COL7A1 HSPG2 LAMB3 COL4A4 COL4A1 LAMA5 LOXL2 FBN1 AGRN ANG CD151 RELL2 EFEMP2 HMCN1 LAMC1	NO
GO_BASE_CONVERSION_OR_SUBSTITUTION_EDITING	0.612211	0.914396	0.059476	0.353418	0.890476	15	APOBEC3A APOBEC3B ADAT3 RBM47 ADAR APOBEC3H NUDT16	NO
GO_BASE_EXCISION_REPAIR	0.380368	0.770836	0.121543	-0.291699	-1.04088	40	RECQL4 NEIL1 POLD1 POLL XRCC1 APEX2 POLG HMGA1 NEIL2 POLE LIG1 RPA1 TP53 SMUG1 UNG HUWE1 POLQ LIG3 PRMT6 APEX1 FEN1	NO
GO_BASOLATERAL_PLASMA_MEMBRANE	0.31864	0.725118	0.0785029	0.285675	1.07203	138	P2RY6 ADRA2A SLC4A10 AQP9 ANXA1 LIN7A SLC4A1 TACSTD2 AQP1 LEPR C5AR1 SLC7A7 BEST1 MARVELD2 ABCC6 NAIP SLC22A1 P2RY12 GM2A SLCO4C1 NUMB LRRC7 CA11 LRP1 CD1D SLC14A1 FLOT1 AJAP1 NOD2 ITGA9 ADAM9 TFRC PDGFB STXBP3 AP2A1 SLC40A1 MPZ TEK	NO
GO_BEHAVIOR	0.769231	0.982605	0.155242	-0.191941	-0.916734	313	MDK SYNPO APBA1 LEP PAX5 KCNA2 TNR GPRC5B SOBP HOXA1 MTA1 CELSR1 ADM2 WFS1 MMP17 KALRN RAG1 CRTC1 PRKN NTRK1 OLFM2 APBA2 PER3 KAT2A STRBP GNB1L ITPR3 BHLHB9 ABCA7 SYNGAP1 JUN ADA PLA2G6 MSS51 CHRNA7 GNG7 PDE1B	NO
GO_BETA_CATENIN_BINDING	0.134021	0.479032	0.227987	-0.320762	-1.2507	62	GRIP1 DACT1 BCL9L PRKN PTPRK TCF7 ESR1 AXIN2 CBY1 LEF1 DLG5 SMAD7 SETD1A KANK1 CDH2 DVL3 FOXO1 CXADR DVL1 BCL9 AMER1 RUVBL2 AXIN1	NO
GO_BETA_CATENIN_DESTRUCTION_COMPLEX_DISASSEMBLY	0.822259	0.999861	0.0461379	0.28452	0.73014	17	FZD1 FZD5 FRAT2 APC FRAT1 CSNK1A1 FZD2 GSK3B	NO
GO_BETA_CATENIN_TCF_COMPLEX_ASSEMBLY	0.0261919	0.222576	0.352488	-0.50165	-1.60318	27	DACT1 BCL9L TCF7 AXIN2 PYGO2 TLE1 MYC LEF1 MEN1 TRRAP RUVBL1 SMARCA4 BCL9	NO
GO_BETA_TUBULIN_BINDING	0.10241	0.419916	0.169571	0.446335	1.33026	33	FGF13 SNCA GABARAPL2 RGS2 TTLL7 GABARAP SPAST TBCA ARL8B IFT74 SYT11 BBS4 ARL8A PDCD5 TAOK1 GABARAPL1 NDEL1	NO
GO_BHLH_TRANSCRIPTION_FACTOR_BINDING	0.68299	0.944834	0.0760837	-0.291367	-0.864911	20	IKZF4 BHLHE41 UBE2I TCF3 MAP3K10 TCF4	NO
GO_BICARBONATE_TRANSPORT	0.000119922	0.00524417	0.538434	0.709736	1.9835	25	HBB SLC4A3 CA1 HBA2 HBA1 SLC26A8 SLC4A10 SLC4A1 AQP1 CA3 CA4 RHAG CYB5R4	NO
GO_BILE_ACID_BIOSYNTHETIC_PROCESS	0.494309	0.847596	0.0691198	0.375429	0.988141	19	CYP46A1 HSD3B7 STARD4 OSBPL1A SLC27A5 SLC27A2 OSBPL2 OSBPL6 ACOT8 OSBPL9 SCP2	NO
GO_BILE_ACID_METABOLIC_PROCESS	0.434109	0.810646	0.0732559	0.362973	1.02995	27	CYP46A1 AKR1C1 HSD3B7 ARV1 STARD4 OSBPL1A	NO
GO_BINDING_OF_SPERM_TO_ZONA_PELLUCIDA	0.0196052	0.190297	0.352488	-0.572266	-1.64964	18	POMZP3 ZP3 SPA17 OVGP1	NO
GO_BIOMINERAL_TISSUE_DEVELOPMENT	0.0847914	0.38038	0.176694	0.365213	1.29935	86	FAM20A TRPM4 KL ISG15 SLC8A1 ASGR2 ALPL KLF10 ADGRV1 SBDS SRGN CCR1 SNX10 P2RX7 FBN2 FGR LTF CEBPB GAS6	NO
GO_BLASTOCYST_DEVELOPMENT	0.752762	0.976563	0.0417397	0.239162	0.836589	76	SF3B6 LPAR6 PEMT HOPX SBDS COPS2 NBN BRCA2 HORMAD1 NDUFA2 JUNB RBBP8 RTN4	NO
GO_BLASTOCYST_FORMATION	0.747692	0.973263	0.0469759	0.281505	0.808112	28	SF3B6 HOPX JUNB RTN4 SP3 EOMES GABPA	NO
GO_BLASTOCYST_GROWTH	0.326599	0.731376	0.0931455	0.437992	1.10905	16	SBDS COPS2 NBN BRCA2	NO
GO_BLOC_COMPLEX	0.528455	0.864901	0.0658312	0.361813	0.952304	19	BLOC1S2 BLOC1S6 BLOC1S1 HPS1 DTNBP1 WASHC4 STX12 SNAPIN	NO
GO_BLOOD_MICROPARTICLE	5.8272e-05	0.00285709	0.557332	0.587022	1.94778	58	HBB C3 ORM2 C1QB HBA2 HBA1 ORM1 C4A HP LGALS3BP CFH SLC4A1 STOM ANXA5 CLIC1 KDM4D C1R PROS1 ITIH1 SERPINF2 EIF2A	NO
GO_BLOOD_VESSEL_ENDOTHELIAL_CELL_MIGRATION	0.988372	1	0.0780892	-0.176482	-0.700561	80	FGF2 NOS3 ALOX12 EFNB2 TBXA2R PLCG1 SCARB1 ABL1 PRKCA HSPB1 GPLD1 ETS1 HDAC9 CD40 HDAC7 HDAC5 MYH9 EPHB4 SRF SH3BP1	NO
GO_BLOOD_VESSEL_MORPHOGENESIS	0.648412	0.93115	0.0379271	0.228015	0.93664	362	MMP14 C3 FOXC1 SGCD NRP1 IL1B ANXA3 NPRL3 SAT1 ADM C3AR1 ANXA1 STAB1 PDCD10 PLK2 AQP1 SEMA4A LEPR FZD5 CXCL10 PDGFRA HPSE TLR3 PROK2 C5AR1 DYSF STAT1 CYBB EPAS1 EPHB1 LRG1 STARD13 GLUL CX3CR1 CYP1B1 CALCRL ADTRP SERPINF2 TNFRSF12A C5 PTPRM HGF DLL1 ISM1 ADAM12 ZFP36L1 PRDM1 LRP1 EGF CXCR2 FBXW7 ADAM15 JUNB TGFBR3 KLF5 KLF4 CTSH CD160 PTGS2 SASH1 MAPK14 IL18 SPI1 GRN THSD7A PTPRB PTEN EFNA1 SEMA5A…	NO
GO_BLOOD_VESSEL_REMODELING	0.421705	0.802729	0.0747385	0.367366	1.04241	27	FOXC1 SEMA3C EPAS1 AXL ATG5 CCR2 RBPJ CST3 ATP7A MDM2 TGM2	NO
GO_BODY_FLUID_SECRETION	0.845361	1	0.0799859	-0.20967	-0.811746	61	CCND1 KALRN CAD ADA WNK3 MTX1 OAS2 GUCA1B CHRM3	NO
GO_BODY_MORPHOGENESIS	0.920588	1	0.067676	-0.204267	-0.701201	35	FUZ LRP6 CDON LEF1 ANKRD11 SKI ARID5B	NO
GO_BONE_CELL_DEVELOPMENT	0.585843	0.900185	0.0572461	0.312723	0.915598	31	LILRB1 LTF TYROBP FBXW7 PIP4K2A NOTCH2 TNFSF11 SRC TAL1 ZNF385A ABI1 FLI1 ATP6AP1 FAM20C	NO
GO_BONE_DEVELOPMENT	0.923954	1	0.0278699	0.206211	0.773089	137	MMP14 FOXC1 COL13A1 SH3PXD2B PDGFC ALPL LILRB1 SBDS VIT PLS3 RAB23 CHSY1 CYP26B1 LTF	NO
GO_BONE_GROWTH	0.514512	0.857167	0.0928481	-0.306439	-0.963293	24	LEP COL7A1 COL6A3	NO
GO_BONE_MINERALIZATION	0.168056	0.536568	0.123257	0.3586	1.21745	64	TRPM4 KL ISG15 SLC8A1 ASGR2 KLF10 ADGRV1 SBDS SRGN CCR1 SNX10 P2RX7 FBN2 FGR LTF	NO
GO_BONE_MORPHOGENESIS	0.220315	0.612069	0.10714	0.355425	1.17933	58	MMP14 FOXC1 COL13A1 ALPL VIT RAB23 CHSY1 CYP26B1 LTF	NO
GO_BONE_REMODELING	0.784792	0.989398	0.0415718	0.246657	0.815594	57	PDK4 LEPR SNX10 P2RX7 ZNF675 TFRC NOTCH2 MITF TNFAIP3 SPP1 TPP1 TNFSF11 ADRB2 SUCO SRC RAB3D CA2 CSF1R WNT16 RAC1 PTK2B ATP6AP1 CTSK RASSF2	NO
GO_BONE_RESORPTION	0.706997	0.955494	0.04707	0.27179	0.848283	42	PDK4 SNX10 P2RX7 ZNF675 TFRC TNFAIP3 SPP1 TPP1 TNFSF11 ADRB2 SRC RAB3D CA2 CSF1R RAC1 PTK2B ATP6AP1	NO
GO_BRAIN_MORPHOGENESIS	0.405449	0.78981	0.0785029	0.392074	1.05719	22	SLC4A10 OTX1 FOXO3 SLIT1 PTEN PSEN1 FZD3 FANCC BBS4 NF1 MKKS FZD6	NO
GO_BRANCHED_CHAIN_AMINO_ACID_CATABOLIC_PROCESS	0.555556	0.881175	0.0873098	-0.318609	-0.929087	19	BCAT2 IVD BCKDHB ALDH6A1 MCCC2 HIBCH HIBADH DBT	NO
GO_BRANCHING_INVOLVED_IN_BLOOD_VESSEL_MORPHOGENESIS	0.659033	0.936844	0.0772747	-0.299467	-0.86326	18	COL4A1 ENG ABL1 LEF1 PLXND1 SRF	NO
GO_BRANCHING_INVOLVED_IN_SALIVARY_GLAND_MORPHOGENESIS	0.151815	0.50923	0.143759	0.52594	1.32516	15	NRP1 SEMA3A NTN4 SEMA3C HGF TNF	NO
GO_BRANCHING_MORPHOGENESIS_OF_AN_EPITHELIAL_TUBE	0.0123228	0.144086	0.38073	-0.380179	-1.52255	76	NKX3-1 FGF2 COL4A1 CELSR1 PKD1 LAMA5 SPRY2 DCHS1 TIMELESS ESR1 CSF1 ENG LRP6 MET MYC ABL1 LEF1 DLG5 SOX8 PML	NO
GO_BROWN_FAT_CELL_DIFFERENTIATION	0.644886	0.92927	0.0843144	-0.278108	-0.893804	28	LEP ADRB1 LAMB3	NO
GO_BRUSH_BORDER	0.701408	0.952239	0.045862	0.256326	0.859075	60	ITLN1 MYL6 CAPZA2 PEMT AQP1 CLIC1 CA4 CD36 PLB1	NO
GO_BRUSH_BORDER_MEMBRANE	0.229457	0.625652	0.109684	0.430872	1.20416	25	ITLN1 PEMT AQP1 CA4 CD36 PLB1 GNA13 CYBRD1 ATP7A SLC7A11	NO
GO_B_CELL_ACTIVATION	0.5	0.849611	0.154191	-0.212807	-0.973978	197	TNFRSF13C ICOSLG CD22 CD19 BLNK FOXJ1 FCRL1 CD79A RAG1 NTRK1 TLR9 CD81 PAWR CD38 CD79B EXO1 CD27 ADA CD320 CD180 BANK1 CR2 ZAP70 CCR6 MS4A1 POLM CARD11 ABL1 TPD52 FOXP3 LEF1 TNFRSF4 PAXIP1 SLA2 CD40LG CXCR5 TCF3 SWAP70 HDAC9 CD40 DOCK10 PCID2 IL27RA CTLA4 RNF8 HDAC5 TP53BP1 NSD2 FCRL3 CD28 MZB1 IKZF3 PRKDC ITFG2 TBC1D10C	NO
GO_B_CELL_ACTIVATION_INVOLVED_IN_IMMUNE_RESPONSE	0.774898	0.985964	0.0398407	0.236153	0.812126	67	TLR4 NBN BCL3 BATF SHLD3 APLF DLL1 ATAD5 TNFSF13 SHLD2 TFRC BCL6 NOTCH2 LIG4 LGALS1 FCGR2B PTPRC GAPT	NO
GO_B_CELL_APOPTOTIC_PROCESS	0.723127	0.962979	0.0511148	0.305642	0.808063	20	TNFRSF21 LYN PTEN BCL6 FNIP1 BCL2L11 IRS2	NO
GO_B_CELL_DIFFERENTIATION	0.838174	1	0.0908241	-0.203347	-0.831714	97	CD19 BLNK CD79A RAG1 NTRK1 TLR9 CD79B CD27 ADA CR2 POLM CARD11 ABL1 TPD52	NO
GO_B_CELL_HOMEOSTASIS	0.627841	0.920318	0.0857844	-0.280289	-0.900814	28	TNFRSF13C ADA SH2B2 ABL1 FOXP3	NO
GO_B_CELL_MEDIATED_IMMUNITY	0.329787	0.735183	0.0795565	0.297491	1.06858	94	C3 C1QB C4A C1QA TLR8 TREX1 NBN BCL3 C1R FCER1G BATF CR1 SHLD3 APLF C5 ATAD5 TNFSF13 TNF SHLD2 CD55 TFRC BCL6	NO
GO_B_CELL_PROLIFERATION	0.0985401	0.408396	0.276501	-0.327171	-1.27892	66	TNFRSF13C CD22 CD19 CD79A TLR9 CD81 PAWR CD38 ADA CD320 CD180 CR2 MS4A1 CARD11 ABL1 LEF1 TNFRSF4 CD40LG	NO
GO_B_CELL_RECEPTOR_SIGNALING_PATHWAY	0.109792	0.434937	0.287805	-0.347494	-1.30174	53	PAX5 CD22 CD19 BLK GCSAML CD79A CD38 CD79B ABL1 CTLA4 LCK FOXP1 RFTN1 LIME1 ITK FCRL3 TEC NFATC2 STAP1	NO
GO_C21_STEROID_HORMONE_BIOSYNTHETIC_PROCESS	0.832226	1	0.0455878	0.282938	0.726081	17	PPARGC1A ADM CACNA1H STARD3NL	NO
GO_C21_STEROID_HORMONE_METABOLIC_PROCESS	0.115385	0.444958	0.164406	0.48676	1.32519	23	CYP46A1 AKR1C1 PPARGC1A ADM AKR1C3	NO
GO_CADHERIN_BINDING	0.913143	1	0.0229406	0.199118	0.799146	261	RPL34 CHMP5 OLFM4 ANXA1 TACSTD2 CNN3 SHTN1 CTNNAL1 TWF1 STAT1 TXNDC9 S100P AFDN EPS8L1 RPL24 CLIC1 ZC3H15 PCMT1 CDH1 CAPZA1 NUMB ANLN TRIM25 PRDX6 PTPRM EIF2A EIF3E PLIN3 S100A11 PICALM UBAP2 SNX2 SH3GLB1 CHMP2B RTN4 PKN2 IQGAP1 CIP2A DIAPH3 ASAP1 EFHD2 RPL15 CD46 KTN1 BZW1 PSEN1 BSG CAST SRC ARHGAP18 VAPA PKP2 IDH1 F11R RAB10 DDX3X RAB1A PPME1 PDLIM5 CTNNA1 EEF1G CBL	NO
GO_CAJAL_BODY	0.590585	0.901365	0.0543434	0.279623	0.9231	54	AK6 ISG20 SMN2 FMR1 SCARNA13 SNRPC FAM118B SCARNA5 NOP10 SMNDC1 NOP58	NO
GO_CALCINEURIN_MEDIATED_SIGNALING	0.930723	1	0.0359209	0.227656	0.666536	31	NRG1 PPP3R1 TNF RCAN1 CHP1 PPP3CA PRNP SPPL3 ATP2B4 NFAT5 GSK3B MAPK7	NO
GO_CALCIUM_ACTIVATED_CATION_CHANNEL_ACTIVITY	0.486799	0.843235	0.0706196	0.38794	0.977457	15	TRPM4 KCNMA1 TMEM63B CATSPER2 TMEM63C KCNMB4 CATSPER1 KCNMB1 ANO10	NO
GO_CALCIUM_CHANNEL_COMPLEX	0.190769	0.57199	0.17822	-0.317182	-1.1534	44	CACNB3 CATSPERB CACHD1 PKD1 CATSPERE CACNG6 CACNB4 CACNB1	NO
GO_CALCIUM_CHANNEL_REGULATOR_ACTIVITY	0.582353	0.898405	0.0919686	-0.285959	-0.930557	29	CACNB3 STX1A CACNG6 CACNG8 ITPR1 PRKG1	NO
GO_CALCIUM_DEPENDENT_CELL_CELL_ADHESION_VIA_PLASMA_MEMBRANE_CELL_ADHESION_MOLECULES	0.536545	0.869611	0.0661326	0.370476	0.950721	17	PCDHGC3 PCDH12 PCDHGB4 CDH1	NO
GO_CALCIUM_DEPENDENT_PHOSPHOLIPID_BINDING	0.165367	0.533368	0.132846	0.454085	1.27538	26	ANXA3 RPH3A ANXA1 ANXA9 PLA2G4A DYSF ANXA5	NO
GO_CALCIUM_DEPENDENT_PROTEIN_BINDING	0.107038	0.42932	0.16318	0.423008	1.31467	41	CD177 S100B ANXA3 ANXA1 S100P S100A6	NO
GO_CALCIUM_ION_BINDING	0.00194647	0.0416792	0.45506	0.348464	1.43639	381	S100A8 RCVRN S100A12 PLSCR4 S100B CACNA1E FKBP7 SPOCK1 PRRG1 LPL TRPM4 S100A9 FSTL4 DSC2 PCDHGC3 TPT1 ITLN1 DNASE1L3 ANXA3 AIF1 PLSCR1 MYL6 SLC8A1 UMODL1 PCDH12 NRXN1 SPTA1 RPH3A ANXA1 PCDHGB3 S100Z EYS STAB1 VCAN ANXA9 FAT1 TNNT1 GCA PCDHGB5 TBC1D8B F12 ADGRV1 PLA2G4A MYL4 CLEC4A PLS3 PCDHGB4 PCDHGA10 PRRG4 DYSF SNCA S100P ANXA5 MYL12B S100A6 CD69 FBN2 VWCE SLIT1 C1R PROS1 PPP3R1 GALNT3 RCN2 SRR…	NO
GO_CALCIUM_ION_IMPORT	0.10279	0.419965	0.166934	0.41286	1.31734	46	SEMG1 CACNA1E SLC8A1 LGALS3 DYSF MICU2 EGF PDGFB CDK5 CACNA1H MCU SLC30A1 PKD2 MAIP1 MICU1 PRNP ZMPSTE24	NO
GO_CALCIUM_ION_REGULATED_EXOCYTOSIS	0.443137	0.819078	0.128143	-0.2427	-0.997047	92	STX1A APBA1 SCRIB SCAMP5 SYT15 SNPH UNC13A ZP3 GRIN3A APBA2 WNT7A ADORA2A SNAP47	NO
GO_CALCIUM_ION_TRANSMEMBRANE_IMPORT_INTO_CYTOSOL	0.512097	0.855597	0.0582216	0.272419	0.967398	84	NTSR1 P2RY6 SLC8A1 CLIC2 CXCL10 F2R DDIT3 FKBP1B SNCA P2RX7 LYN MCOLN1	NO
GO_CALCIUM_ION_TRANSMEMBRANE_TRANSPORT	0.717004	0.960817	0.0370705	0.227554	0.891987	195	NTSR1 CACNA1E GEM P2RY6 TRPM4 ADRA2A CACNA2D2 SLC8A1 CLIC2 CXCL10 F2R CACNA2D3 DDIT3 DYSF FKBP1B SNCA P2RX7 ANXA5 TRPC6 LYN P2RY12 MCOLN1 GAS6 MICU2 SUMO1 STAC3 NIPSNAP2 SLC24A4 CATSPER2 CACNA2D4 ATG5 FMR1 CACNA1H CALM2 PDE2A MCU TMCO1 GSTO1 ITGAV CCR5 CYBA PLCB1 CATSPER1 MCOLN2 TRPC1 PSEN1 OPRL1 PMPCB TSPAN13 KCNE3 PTPRC	NO
GO_CALCIUM_ION_TRANSMEMBRANE_TRANSPORTER_ACTIVITY	0.678284	0.944427	0.0451344	0.249505	0.881958	81	CACNA1E TRPM4 CACNA2D2 SLC8A1 CACNA2D3 FKBP1B ANXA5 TRPC6 MCOLN1 GAS6 SLC24A4 CATSPER2 CACNA2D4 CDK5 CACNA1H PDE2A MCU TMCO1 ITGAV CATSPER1 MCOLN2 TRPC1 PSEN1	NO
GO_CALCIUM_MEDIATED_SIGNALING	0.455696	0.827989	0.0609039	0.268365	1.00777	143	NRG1 P2RY6 TRPM4 SGCD SLC8A1 CLIC2 SELENOK FPR2 CCR1 FKBP1B CMKLR1 P2RX7 PLEK HINT1 CCRL2 PPP3R1 CX3CR1 P2RY12 NUDT4 MCOLN1 CXCR1 LRRK2 MCTP1 BST1 CXCR2 TNF CCR2 EDN1 MCTP2 CALM2 MCU GSTO1 CCL4 CALML4 LAT2 CCR5 TNFSF11 SPHK1 RCAN1 CXCR6 TMBIM4	NO
GO_CALCIUM_RELEASE_CHANNEL_ACTIVITY	0.823232	0.999914	0.0656814	-0.278697	-0.772365	15	ITPR3 ITPR1 TPCN1 RASA3	NO
GO_CALMODULIN_BINDING	0.0026858	0.053114	0.431708	-0.356217	-1.53719	127	USP6 KCNN3 MYO1B NOS3 KCNQ5 KCNQ3 PHKA1 OBSCN WFS1 MAP2 ARPP21 UNC13A MYO1A SPA17 SPTBN1 AEBP1 RGS1 PLA2G6 TTN ORAI1 MYO1C PDE1B SPTAN1 MYO1E ITPKB ADD2 CEACAM1 EEF2K CTH ENKUR CALD1 ADCY3	NO
GO_CALMODULIN_DEPENDENT_PROTEIN_KINASE_ACTIVITY	0.643411	0.929001	0.0793435	-0.304713	-0.888564	19	PHKA1 EEF2K CAMK4	NO
GO_CAMERA_TYPE_EYE_DEVELOPMENT	0.479903	0.839248	0.0566484	0.258442	0.993644	170	PFDN5 RORB FOXC1 MYH15 ACHE NRP1 SMARCD3 FAT1 NECTIN3 FZD5 PDGFRA LIMK2 RPL24 FBN2 EPHB1 CYP1B1 MERTK PTPRM DLL1 KLF4 ZEB2 TWSG1 FKBP8 TMOD1 MITF CDKN1C PDE6B NINJ1 CABP4 TGFBR1 SP3 NHS XRN2 PSEN1 TOPORS BFSP1 HIF1A LAMB2 RARA TENT2 ALDH1A2 CDK4	NO
GO_CAMERA_TYPE_EYE_MORPHOGENESIS	0.706553	0.955375	0.0460458	0.25877	0.854351	56	RORB FAT1 NECTIN3 FZD5 EPHB1 PTPRM DLL1	NO
GO_CANONICAL_WNT_SIGNALING_PATHWAY	0.919708	1	0.120433	-0.183501	-0.856091	229	WNT11 SDC1 WNT10A GPRC5B DACT1 BCL9L BICC1 GLI1 WNT5B DIXDC1 FUZ NKD1 PRKN BAMBI TCF7 LZTS2 IGFBP4 PTK7 AXIN2 WNT7A DAAM2 LRP6 RBMS3 DVL2 PYGO2 TLE1 WNT10B LEF1 JRK CCAR2 CSNK1E EGR1 INVS KANK1 FZD8 LGR4 RUVBL1 PRICKLE1 CDH2 NPHP4 ZNRF3 DVL3 ASPM RAPGEF1 FOXO1 PSME3 LIMD1 DVL1 RNF220 MKS1 PSMC5 PSMD3 BCL9 AMER1 RUVBL2 AXIN1	NO
GO_CARBOHYDRATE_BINDING	0.000323845	0.0111962	0.498493	0.425116	1.65141	187	GALNT5 P4HA2 SIGLEC16 CLEC2B P3H3 COLEC12 KLRF1 OLR1 SIGLEC14 CLEC4D SIGLEC11 ITLN1 CLEC9A ASGR2 KLRB1 LGALS3 RPIA VCAN LGALS2 LGALS4 ALPK1 FBXO6 CLEC11A CLEC4G CLEC12A CLEC4A CLEC1A CLC ASGR1 FBXO2 MRC1 CD69 LGALS9 CLEC7A CLEC12B HK3 LGALSL CLEC5A GALNT3 MGAM CLECL1 P3H2 KLRK1 FCN1 SIGLEC10 CLEC4E KLRC2 SLC2A3 CD302 SIGLEC1 GPCPD1 CLEC6A CRYBG3 CD33 CLEC10A PYGL UGP2 PLOD2 HK2 GALNT4 KRT1 GAA	NO
GO_CARBOHYDRATE_BIOSYNTHETIC_PROCESS	0.824475	1	0.0322878	0.219696	0.835725	154	NTSR1 P2RY6 HAS3 B3GALT2 PPARGC1A ATF3 LEPR IGF2 B4GALT5 SNCA PPP1CB KAT2B PLEK GYG1 ST3GAL4 B3GNT5 EGF SORBS1 UGP2 DGAT2 PDGFB SDHAF3 AP2A1 PPP1R3B PPP1R3D IMPA2 CHST15 CD244 CSGALNACT2	NO
GO_CARBOHYDRATE_CATABOLIC_PROCESS	0.677903	0.944427	0.0419082	0.238649	0.899592	146	BPGM PPARGC1A TREX1 BAD PFKFB3 GK PPP1CB P2RX7 SCARB2 HK3 MGAM GM2A PRKAG2 IDNK PFKFB4 PYGL AOAH PRXL2C NAGA HK2 CTBS GAA PPP1R3B PPP1R3D CHIT1 FUT10 GALK1 HIF1A ADPGK HEXB STBD1 PRKAG1 PFKFB2 GALE NUP58 MANBA PGK1 STAT3 GLB1 FUT4 NUP98 GPD2 TIGAR FUT7 NUP54 NUP50 ABHD10 NEU1 PHKG2 NUP214 DDIT4 TKTL1 LDHA ENTPD5 TPI1	NO
GO_CARBOHYDRATE_DERIVATIVE_CATABOLIC_PROCESS	0.682028	0.944427	0.109684	-0.213449	-0.923666	133	SDC1 FGF2 HSPG2 NUDT11 GPC2 UPB1 NEIL1 PDE7B ACOT7 APOBEC3D OVGP1 AGRN LYG1 ADA MYORG MLYCD	NO
GO_CARBOHYDRATE_DERIVATIVE_TRANSMEMBRANE_TRANSPORTER_ACTIVITY	0.564565	0.886343	0.0949752	-0.279836	-0.935185	32	SLC29A2 SLC25A42 SLC29A3 SLC35A2 SLC37A4 SLC29A1 SLC37A1 SLC35D1 SLC25A17 SLC35A4 SLC35B4	NO
GO_CARBOHYDRATE_DERIVATIVE_TRANSPORT	0.973422	1	0.0709609	-0.184128	-0.696846	54	SLC29A2 ADA SCARB1 SLC25A42 SLC29A3 SLC35A2 SLC37A4	NO
GO_CARBOHYDRATE_HOMEOSTASIS	0.551171	0.880105	0.0508054	0.252378	0.961975	156	EFNA5 TRPM4 ADRA2A PDK4 TCF7L2 PPARGC1A FFAR2 LEPR BAD FOXO3 FKBP1B ADIPOR1 SUCNR1 HK3 RPS6 GPR27 GAS6 ICAM1 LRP1 CYB5R4 NADK PYGL NDUFAF2 HMGN3 STXBP3 HK2 MPC2 FAM3B RMI1 MCU ENY2 CYBA LGALS1 SESN3 HIF1A USF1 HMGCR PIM3 PPP3CA RAP1A PTPRN2 IRS2 FOXO4	NO
GO_CARBOHYDRATE_KINASE_ACTIVITY	0.879675	1	0.0420772	0.259869	0.683983	19	PFKFB3 HK3 PFKFB4 FGGY HK2 GALK1 NAGK PFKFB2	NO
GO_CARBOHYDRATE_METABOLIC_PROCESS	0.55235	0.880105	0.0441523	0.236179	0.977958	418	PGM5 NTSR1 IGFBP3 P2RY6 KL HAS3 MYOF PDK4 BPGM B3GALT2 PPARGC1A PCDH12 ATF3 RPIA AMY1C LEPR TREX1 IGF2 B4GALT5 BAD PFKFB3 DYSF GK SNCA SLC35A1 PPP1CB ADIPOR1 KAT2B P2RX7 PLEK PMAIP1 SCARB2 ME1 HK3 GYG1 GALNT3 MGAM MIDN PRKAG2 ST3GAL4 IDNK B3GNT5 SLC2A3 EGF FUCA2 CHST7 COQ3 UEVLD DUSP12 TNF SORBS1 ST3GAL6 DPM3 PFKFB4 MAPK14 SERP1 SYNJ1 PYGL UGP2 DGAT2 AOAH PRXL2C PDGFB PTEN FGGY NAGA HK2 B4GALT6 S…	NO
GO_CARBOHYDRATE_PHOSPHORYLATION	0.684295	0.945735	0.052913	0.308125	0.838864	23	PFKFB3 HK3 PFKFB4 FGGY HK2 ITPK1 GALK1 NAGK PFKFB2 IPPK	NO
GO_CARBOHYDRATE_TRANSMEMBRANE_TRANSPORT	0.00499436	0.0804868	0.407018	0.485158	1.69133	74	C3 SLC25A27 SLC2A12 SLC2A14 ITLN1 IL1B SORT1 SLC5A9 TMEM144 MFSD4A CLTCL1 PPBP MEF2A RTN2 PRKAG2 PID1 OSBPL8 RHOQ SLC2A3 RAB4B TNF SORBS1 PRKCI MAPK14 STXBP3 HK2 EDN1	NO
GO_CARBOHYDRATE_TRANSMEMBRANE_TRANSPORTER_ACTIVITY	0.00614342	0.0918675	0.407018	0.638123	1.72063	22	SLC2A12 SLC2A14 AQP9 SLC5A9 TMEM144 AQP1 MFSD4A PPBP SLC2A3	NO
GO_CARBOHYDRATE_TRANSPORT	0.00526857	0.0829502	0.407018	0.437285	1.58965	101	C3 SLC25A27 SLC2A12 SLC2A14 ITLN1 IL1B AQP9 SORT1 SLC5A9 TMEM144 AQP1 MFSD4A CLTCL1 PPBP SLC35A1 MEF2A RTN2 PRKAG2 PID1 OSBPL8 RHOQ SLC2A3 SLC37A3 RAB4B TNF SORBS1 PRKCI MAPK14 STXBP3 HK2 EDN1 SLC35D2	NO
GO_CARBON_CARBON_LYASE_ACTIVITY	0.97654	1	0.0646485	-0.176677	-0.618442	37	CLYBL PCK2 MLYCD SHMT1 AZIN2 TYW1B SHMT2 GOT1 MVD	NO
GO_CARBON_OXYGEN_LYASE_ACTIVITY	0.670959	0.941624	0.0486034	0.2643	0.876967	58	NEIL3 CA1 CA3 CDYL CA4 APLF	NO
GO_CARBOXYLIC_ESTER_HYDROLASE_ACTIVITY	0.52957	0.865525	0.0566484	0.27053	0.96069	84	LPL CA1 ACHE CES1 GDPD3 PTRH1 PLA2G4A PRORSD1P CLC PRDX6 PLB1 PLA2G7 NCEH1 MRPL58 LIPH APMAP AOAH CES4A ABHD2 PTRHD1 PNPLA8 GDE1	NO
GO_CARBOXYPEPTIDASE_ACTIVITY	0.851163	1	0.0414044	0.255655	0.71448	25	MINDY4 AGTPBP1 MINDY2 CTSZ CPQ MINDY3 CPM AGBL5 CPVL PRCP SCPEP1	NO
GO_CARBOXY_LYASE_ACTIVITY	0.845554	1	0.0419926	0.263445	0.739933	26	ME1 ODC1 AMD1 PPCDC ME3 PISD ECHDC1 AZIN1 FAHD1 CSAD	NO
GO_CARBOXY_TERMINAL_DOMAIN_PROTEIN_KINASE_COMPLEX	0.742671	0.971416	0.0498907	0.299871	0.792804	20	GTF2H5 CDK7 CCNK MNAT1 GTF2H1 CCNT2 CCNT1 GTF2H2 GTF2H3 SNW1 RB1 GTF2H2C	NO
GO_CARDIAC_CELL_DEVELOPMENT	0.233672	0.632256	0.104344	0.361606	1.16736	48	NEBL SGCD SLC8A1 MYBPC3 PDGFRA MEF2A RGS2 TGFBR3 ATG5 EDN1	NO
GO_CARDIAC_CHAMBER_DEVELOPMENT	0.484967	0.842525	0.059476	0.274387	0.991043	95	FOXC1 XIRP2 NRG1 NRP1 NPRL3 FZD1 SMARCD3 SEMA3C MYBPC3 ADGRG6	NO
GO_CARDIAC_CHAMBER_MORPHOGENESIS	0.581044	0.897412	0.0533478	0.27236	0.932919	66	FOXC1 NRG1 NRP1 FZD1 SMARCD3 SEMA3C MYBPC3 ADGRG6	NO
GO_CARDIAC_CONDUCTION	0.0849078	0.380556	0.287805	-0.3235	-1.29556	76	DSG2 CACNB3 FXYD2 DSP DMPK KCND1 NPR2 CACNG6 EHD3 CACNB4 KCNJ14 CACNB1 ITPR3 ATP2A3 KCNA5 CACNG8 BIN1 ITPR1	NO
GO_CARDIAC_EPITHELIAL_TO_MESENCHYMAL_TRANSITION	0.357143	0.758144	0.0873098	0.423594	1.08703	17	ADAM15 TGFBR3 EFNA1 RTN4 RBPJ TGFBR1 OLFM1 WNT16	NO
GO_CARDIAC_MUSCLE_CELL_ACTION_POTENTIAL	0.0488166	0.301971	0.248911	0.4598	1.41962	40	FGF13 TRPM4 DSC2 SLC8A1 HCN2 KCNJ2 KCND3 SCN1B	NO
GO_CARDIAC_MUSCLE_CELL_ACTION_POTENTIAL_INVOLVED_IN_CONTRACTION	0.474259	0.835888	0.0691198	0.352374	0.989708	26	TRPM4 DSC2 KCNJ2 KCND3 SCN1B RNF207	NO
GO_CARDIAC_MUSCLE_CELL_CONTRACTION	0.0378215	0.272949	0.287857	0.472744	1.43714	37	FGF13 TRPM4 DSC2 SGCD KCNJ2 KCND3 SCN1B SUMO1 RNF207	NO
GO_CARDIAC_MUSCLE_CELL_DIFFERENTIATION	0.320055	0.72546	0.0828962	0.320942	1.09933	66	NEBL NRG1 SGCD SLC8A1 SOX6 MYBPC3 PDGFRA MEF2A RGS2	NO
GO_CARDIAC_MUSCLE_CELL_MEMBRANE_REPOLARIZATION	0.267101	0.67003	0.103197	0.444015	1.1739	20	KCNJ2 KCND3 SCN1B RNF207 KCNE1 KCNE3 KCNH2 ATP1B1 ZMPSTE24	NO
GO_CARDIAC_MUSCLE_CELL_PROLIFERATION	0.652108	0.933107	0.0522693	0.294755	0.878488	33	FOXC1 TENM4 TGFBR3 MAPK14 PTEN RBPJ TGFBR1 PRKAR1A RIPK1 FGFR2 DIPK2A MAPK1	NO
GO_CARDIAC_MUSCLE_CONTRACTION	0.152589	0.510733	0.128789	0.346841	1.22169	78	FGF13 TRPM4 DSC2 SGCD SLC8A1 CLIC2 KCNJ2 KCND3 TNNT1 MYBPC3 MYL4 SCN1B FKBP1B RGS2 SUMO1 RNF207	NO
GO_CARDIAC_MUSCLE_TISSUE_DEVELOPMENT	0.604167	0.910747	0.049094	0.252618	0.92717	115	NEBL FOXC1 XIRP2 NRG1 SGCD SLC8A1 NPRL3 SOX6 MYBPC3 PDGFRA TENM4 MEF2A RGS2	NO
GO_CARDIAC_MUSCLE_TISSUE_MORPHOGENESIS	0.497758	0.84937	0.0646485	0.332691	0.985399	32	FOXC1 XIRP2 NRG1 MYBPC3	NO
GO_CARDIAC_SEPTUM_DEVELOPMENT	0.727612	0.965488	0.0928481	-0.222216	-0.86829	68	WNT11 NOS3 ZFPM1 HES1 CRELD1 PTK7 ENG NRP2	NO
GO_CARDIAC_SEPTUM_MORPHOGENESIS	0.294479	0.700088	0.140406	-0.307961	-1.0989	40	WNT11 NOS3 ZFPM1 HES1 ENG NRP2	NO
GO_CARDIAC_VENTRICLE_DEVELOPMENT	0.426796	0.803906	0.0683111	0.294307	1.02096	71	FOXC1 XIRP2 NRG1 NPRL3 FZD1 SMARCD3 SEMA3C MYBPC3	NO
GO_CARDIAC_VENTRICLE_MORPHOGENESIS	0.301829	0.708045	0.0919686	0.37234	1.12522	36	FOXC1 NRG1 SMARCD3 SEMA3C MYBPC3 TGFBR3 RBPJ TGFBR1 HIF1A PKP2 FGFR2	NO
GO_CARDIOCYTE_DIFFERENTIATION	0.310992	0.717196	0.0831291	0.312016	1.10293	81	NEBL NRG1 SGCD SLC8A1 SOX6 SEMA3C MYBPC3 PDGFRA TENM4 MEF2A RGS2	NO
GO_CARDIOVASCULAR_SYSTEM_DEVELOPMENT	0.850698	1	0.0234376	0.208947	0.866502	446	MMP14 C3 FOXC1 SGCD NRP1 IL1B ANXA3 TCF7L2 NPRL3 SAT1 ADM C3AR1 ANXA1 ERRFI1 STAB1 PDCD10 PLK2 AQP1 SEMA3C SEMA4A LEPR TREX1 FZD5 CXCL10 SOCS3 PDGFRA HPSE TLR3 DDIT3 PROK2 C5AR1 DYSF STAT1 CYBB EPAS1 EPHB1 LRG1 STARD13 GLUL CX3CR1 CYP1B1 CALCRL ADTRP SERPINF2 TNFRSF12A C5 PTPRM HGF DLL1 ISM1 ADAM12 ZFP36L1 PRDM1 LRP1 EGF CXCR2 FBXW7 ADAM15 JUNB TGFBR3 KLF5 KLF4 PDGFD CTSH CD160 PTGS2 SASH1 MAPK14…	NO
GO_CARGO_RECEPTOR_ACTIVITY	0.043662	0.288779	0.257206	0.416741	1.39671	60	MSR1 CD163L1 COLEC12 ASGR2 LGALS3BP STAB1 FPR2 SCARA5 ASGR1 MRC1 FOLR2 CD36 SCARB2 ABCA1 LOXL3 TFR2 CXCL16 LRP1	NO
GO_CARTILAGE_DEVELOPMENT	0.0177454	0.181399	0.352488	-0.33576	-1.39006	105	WNT11 BMP8B SOX5 FGF2 LEP COL7A1 CCN2 PKD1 WNT5B LOXL2 BMP3 COL6A3 CCN3 AXIN2 WNT7A LRP6	NO
GO_CARTILAGE_DEVELOPMENT_INVOLVED_IN_ENDOCHONDRAL_BONE_MORPHOGENESIS	0.274151	0.678622	0.133555	-0.376443	-1.13746	21	COL7A1 COL6A3 AXIN2 SERPINH1 SMPD3 MATN2 ANXA6 RARG COL6A2	NO
GO_CATALYTIC_ACTIVITY_ACTING_ON_A_GLYCOPROTEIN	0.0665281	0.345229	0.287805	-0.543141	-1.54847	17	MGAT2 MGAT3 FUT8 B4GALNT3 MGAT5	NO
GO_CATALYTIC_ACTIVITY_ACTING_ON_A_RRNA	0.990244	1	0.0366082	0.180493	0.475064	19	MRM3 TFB2M BMT2 FDXACB1 EMG1	NO
GO_CATALYTIC_ACTIVITY_ACTING_ON_A_TRNA	0.995763	1	0.0824344	-0.174161	-0.714322	100	METTL1 WDR4 TRPT1 TRMT61A QTRT1 MARS2 SARS2 BCDIN3D FTO VARS2 AARS2 TRMT2B CDKAL1 NARS2 LARS2 FARSA TYW1B AARSD1 TRMT1 DUS1L FTSJ1 EARS2 LRRC47 TRMT44 TRMT61B FARSB PUS1 TSEN54 TRDMT1 ELAC2 DALRD3 QRSL1 DUS3L GATB NSUN6 NSUN2	NO
GO_CATALYTIC_ACTIVITY_ACTING_ON_DNA	0.144444	0.496595	0.282013	-0.25291	-1.1316	168	PIF1 RECQL4 NEIL1 DNTT CDC45 GINS1 RAD51 XRCC3 EXO1 GINS4 POLD1 SLX4 CHD3 DDX11 POLL XRCC1 SMARCA1 DNMT3A GINS2 ERCC2 ERCC6L POLM MCM4 DFFB MCM7 RTEL1 FTO EME2 EXOG TATDN2 DNASE1 APEX2 POLG TOP3B HMGA1 RAD9A POLD2 SMARCAL1 NEIL2 POLE RUVBL1 N6AMT1 LIG1	NO
GO_CATALYTIC_ACTIVITY_ACTING_ON_RNA	1	1	0.127505	-0.131181	-0.629242	303	PIF1 NOCT METTL1 EDC3 WDR4 RPAP1 PIWIL2 MRM1 DGCR8 ANG EXO1 TRPT1 TRMT61A QTRT1 POLR2I HELZ2 EXOSC7 TUT1 DHX37 MARS2 POLR3H SARS2 POLRMT MOV10 BCDIN3D FTO POLR3G EXOG EXOSC5 PCIF1 VARS2 AARS2 MEPCE TRMT2B CDKAL1 DCPS NARS2 METTL16 POLR2J2 EXOSC2 NOP2 DROSHA LARS2 FARSA DDX24 TYW1B SKIV2L POLR2D RNASEH1 CMTR1 AARSD1 DDX54 TRMT1 DUS1L FTSJ1 PRPF8 EARS2 POLR3A TUT4 LRRC47 FTSJ3 TRMT44 EIF4A3 POLR3D …	NO
GO_CATALYTIC_STEP_2_SPLICEOSOME	0.283984	0.688481	0.0883594	0.313836	1.11656	86	SF3B6 LSM3 SNRPG SNRPD2 SNRPD1 CWC15 BCAS2 SYF2 SNRPB2 SNRPE SLU7 SNRPD3 RBM8A MAGOH BUD31 SNRPF PPWD1 GPATCH1 ISY1 CWC22 DHX35 PPIL3 MAGOHB	NO
GO_CATECHOLAMINE_METABOLIC_PROCESS	0.566502	0.887403	0.0629395	0.354926	0.921468	18	HPRT1 SNCA EPAS1 ITGAM SULT1A4 ATP7A	NO
GO_CATECHOLAMINE_SECRETION	0.42268	0.803151	0.103197	-0.340873	-1.01187	20	STX1A KCNA2 SYT15 PRKN ADORA2A	NO
GO_CATION_CATION_ANTIPORTER_ACTIVITY	0.619601	0.916086	0.0592219	0.344561	0.884219	17	SLC8A1 SLC22A4 SLC11A1 SLC24A4	NO
GO_CATION_CHANNEL_ACTIVITY	0.0293285	0.240985	0.352488	-0.29777	-1.28855	133	KCNN3 CACNB3 KCNA2 KCNQ5 CACHD1 KCNQ3 SCNN1D PKD1 KCND1 TMEM38A KCNG1 CACNG6 TMEM63A CACNB4 KCNK13 GRIN3A SCN3A P2RX5 KCNJ14 CACNB1 KCNK5 ITPR3 KCNH8 ORAI1 CHRNA7 PIEZO1 HCN3 KCNA5 SLC24A3 CACNG8 TSPOAP1 KCNA3 ITPR1 TPCN1 RASA3 HVCN1 SCN2A KCNC4	NO
GO_CATION_CHANNEL_COMPLEX	0.107759	0.43126	0.287857	-0.304349	-1.25538	102	CACNB3 STX1A KCNA2 KCNQ5 CATSPERB CACHD1 KCNQ3 PKD1 KCND1 KCNG1 CATSPERE CACNG6 CACNB4 GRIN3A SCN3A OLFM2 KCNJ14 CACNB1 AMIGO1 KCNA5 CACNG8 KCNA3 ABHD12	NO
GO_CATION_TRANSMEMBRANE_TRANSPORT	0.0729387	0.358708	0.168238	0.283175	1.18355	493	NTSR1 CACNA1E SLC25A27 NEFL GEM P2RY6 TRPM4 COX6C SLC2A12 COX7A2 ATP5PF ADRA2A ANXA3 NDUFA4 CACNA2D2 SLC8A1 SLC4A10 SLC22A16 CLIC2 PPARGC1A KCNK10 HCN2 KCNS1 RHCE KCNJ2 CRHBP KCND3 GLRX AQP1 STOM RHD SLC1A3 CXCL10 ATP6V1G1 F2R SCARA5 CACNA2D3 SLC25A37 DDIT3 COX7B SCN1B DYSF FKBP1B KCNMA1 SNCA P2RX7 ANXA5 ATP5MG RGS2 SLC1A5 TRPC6 KCNJ15 SLC22A1 ATP5F1C LYN ATP5ME P2RY12 SLC22A4 SCN9A SLC11A1 ATP1B…	NO
GO_CATION_TRANSMEMBRANE_TRANSPORTER_ACTIVITY	0.0815877	0.373963	0.161979	0.296224	1.21159	339	SLC18A1 CACNA1E TRPM4 COX6C SLC2A12 COX7A2 ATP5PF NDUFA4 CACNA2D2 SLC8A1 SLC4A10 SLC22A16 KCNK10 HCN2 KCNS1 RHCE KCNJ2 SLC5A9 KCND3 AQP1 RHD SLC1A3 ATP6V1G1 CACNA2D3 SLC25A37 COX7B SCN1B FKBP1B KCNMA1 P2RX7 ANXA5 ATP5MG SLC1A5 TRPC6 KCNJ15 SLC22A1 ATP5F1C ATP5ME SLC22A4 SCN9A SLC11A1 ATP1B3 MCOLN1 GAS6 TFR2 SLC15A4 SLC38A5 RHAG ZDHHC17 MT-ATP6 TMEM63B SLC6A12 ATP5F1E SLC24A4 P2RX1 ATP5PO COX7C CA…	NO
GO_CAVEOLA	0.0836879	0.377599	0.183024	0.402338	1.33212	55	EFNA5 MYOF DLC1 F2R KCNMA1 JAK2 TFPI P2RY12 CDH1 ATP1B3 ADTRP HCK KIF18A LRRK2 FLOT1 CAVIN2 PTGS2 ASAH2	NO
GO_CCR4_NOT_COMPLEX	0.636964	0.92564	0.0576091	0.348247	0.877446	15	PATL1 CPEB3 ZFP36 CNOT8 CNOT7 CNOT6 TOB1	NO
GO_CD4_POSITIVE_ALPHA_BETA_T_CELL_ACTIVATION	0.0876712	0.388377	0.175204	0.370186	1.30041	77	ARG2 RSAD2 ANXA1 SEMA4A LGALS9 BCL3 BATF HMGB1 LOXL3 IL23R NFKBIZ CD160 IL18R1 CD55 IL18 TWSG1 SH3RF1 BCL6 IFNG RIPK2 SOCS1 MYB	YES
GO_CD4_POSITIVE_ALPHA_BETA_T_CELL_CYTOKINE_PRODUCTION	0.000508088	0.0159319	0.477271	0.771358	1.94352	15	IL31RA IL1B RSAD2 IL18RAP ARG1 IL1R1 IL18R1 CD55 IL18	NO
GO_CD4_POSITIVE_ALPHA_BETA_T_CELL_LINEAGE_COMMITMENT	0.550505	0.879808	0.08654	-0.334786	-0.927806	15	ZFPM1 IRF4 IL23A FOXP3	NO
GO_CD4_POSITIVE_OR_CD8_POSITIVE_ALPHA_BETA_T_CELL_LINEAGE_COMMITMENT	0.585242	0.899727	0.0835991	-0.316415	-0.912112	18	ZFPM1 IRF4 IL23A FOXP3	NO
GO_CD8_POSITIVE_ALPHA_BETA_T_CELL_ACTIVATION	0.530945	0.866917	0.0656814	0.359235	0.949751	20	LILRB1 CLEC4A SH3RF1 SOCS1 EOMES IRF1 VSIR CBFB HLA-E	NO
GO_CELLULAR_ALDEHYDE_METABOLIC_PROCESS	0.369318	0.765729	0.118288	-0.324189	-1.0419	28	ALDH8A1 ALDH7A1 CLCN2 AKR7A3	NO
GO_CELLULAR_AMINO_ACID_BIOSYNTHETIC_PROCESS	0.15016	0.506815	0.206588	-0.33093	-1.21642	47	GPT2 BCAT2 RIMKLA PHGDH PYCR3 PYCR1 SHMT1 KYAT1 MTHFD1 ASNS ALDH18A1 NAT8L AASS SERINC5 PYCR2 SHMT2	NO
GO_CELLULAR_AMINO_ACID_CATABOLIC_PROCESS	0.503546	0.850897	0.0615707	0.293517	0.980584	59	RIDA IL4I1 ARG2 AMDHD1 HNMT GCSH ARG1 HGD	NO
GO_CELLULAR_AMINO_ACID_METABOLIC_PROCESS	0.964953	1	0.0210003	0.191214	0.754506	216	RIDA P4HA2 ARG2 THNSL2 PSMA4 PSMA3 PEMT PSMA6 GCSH PSMC6 SLC1A3 KYNU ARG1 HGD PSMA2 SIRT4 SLC7A7 PSMB9 GLUL SRR NQO1 ASNSD1 NAGS OAT ODC1 PSMC2 PPA2 RARS2 CARS2 SLC6A6 PLOD2 APIP PSMB1 PPA1 MTHFS PARS2 PSME2 OAZ1 EGLN1 PSMB8 DLD ALDH4A1 KYAT3 PSME1 OAZ2 PADI4 ATP7A PSMD10 EEF1E1 SEPSECS PSMA1 SLC7A5 ADHFE1 AZIN1 MSRA PSMD9 PSMB7 SLC7A11	NO
GO_CELLULAR_BIOGENIC_AMINE_METABOLIC_PROCESS	0.193548	0.573456	0.172324	-0.337	-1.17964	37	PAOX CHDH ALDH7A1 MOXD1 SARDH HAAO SMOX SRM AGMAT KYAT1	NO
GO_CELLULAR_CARBOHYDRATE_BIOSYNTHETIC_PROCESS	0.722603	0.962979	0.0883594	-0.226168	-0.872976	60	LEP NR1D1 B3GNT7 IRS1 PASK PCK2 PPP1R3F ISYNA1 AKT2	NO
GO_CELLULAR_CARBOHYDRATE_CATABOLIC_PROCESS	0.544629	0.875432	0.0609039	0.314038	0.954676	37	GK PPP1CB SCARB2 MGAM IDNK PYGL AOAH GAA PPP1R3B PPP1R3D STBD1 MANBA GPD2 TIGAR ABHD10 PHKG2	NO
GO_CELLULAR_CARBOHYDRATE_METABOLIC_PROCESS	0.219976	0.611496	0.0959207	0.286285	1.1222	195	NTSR1 IGFBP3 P2RY6 HAS3 MYOF PDK4 PPARGC1A PCDH12 LEPR IGF2 B4GALT5 BAD PFKFB3 DYSF GK SNCA PPP1CB ADIPOR1 PLEK PMAIP1 SCARB2 HK3 GYG1 MGAM MIDN PRKAG2 IDNK B3GNT5 COQ3 DUSP12 SORBS1 PFKFB4 SYNJ1 PYGL UGP2 DGAT2 AOAH PTEN FGGY HK2 GAA PPP1R3B PPP1R3D IMPA2 CD244 CSGALNACT2	NO
GO_CELLULAR_COMPONENT_ASSEMBLY_INVOLVED_IN_MORPHOGENESIS	0.26301	0.666888	0.095288	0.340128	1.14684	62	NEBL PGM5 TNNT1 EPB41L3 MYBPC3 PDGFRA TENM4 MEF2A TLR2 PMP22	NO
GO_CELLULAR_COMPONENT_DISASSEMBLY	0.025458	0.219568	0.352488	0.310503	1.29226	455	FGF13 RPL23 MMP14 C3 MMP8 MAP1B CHMP5 C1QB TOMM7 HMGB2 DNAJC6 DNASE1L3 MRPS18C PPARGC1A MRPL1 BNIP3L SPTA1 SH3PXD2B CAPZA2 C1QA VRK1 FZD1 SMARCD3 CISD2 IRAK3 MELTF FZD5 FBXO7 SPTB MAP6D1 TWF1 MRPL13 MCTS1 ZFAND1 GABARAPL2 CALCOCO2 MRPL47 PLEK ATG3 MRPL52 MRPL40 MRPL36 CX3CR1 DUSP3 HMGB1 GBA CAPZA1 MCOLN1 MRPS28 MTIF3 ACVR1C KIF18A MRPL3 BMERB1 ASPH WASHC1 TRIM58 LRP1 GSPT1 CTSS OPTN MRPS33 MRPS22…	NO
GO_CELLULAR_COMPONENT_DISASSEMBLY_INVOLVED_IN_EXECUTION_PHASE_OF_APOPTOSIS	0.223077	0.616567	0.111011	0.421373	1.20963	28	HMGB2 DNASE1L3 HMGB1 ACVR1C SHARPIN PAM16 KPNB1 CASP3	NO
GO_CELLULAR_COMPONENT_MAINTENANCE	0.569971	0.889097	0.057006	0.296651	0.925876	42	CD177 RASSF8 F2R ZNF804A LNPK CTBP2 FCGR2B ADGRB3 PKP2 CSF1R TANC1 OPHN1 ABHD17B PRNP IGF1R	NO
GO_CELLULAR_DEFENSE_RESPONSE	0.346821	0.751209	0.0813027	0.346434	1.09317	43	LY96 LGALS3BP C5AR1 RAB23 MNDA CLEC5A CX3CR1 KLRC2 TYROBP CXCR2 SH2D1A CCR2 LILRB2 CCR5 NCF2 TCIRG1 CD300C NCF1	NO
GO_CELLULAR_DETOXIFICATION	0.289041	0.693664	0.0883594	0.316066	1.11029	77	HBB S100A9 HBA2 HBA1 HP CLIC2 MGST1 TXN PRDX5 CD36 NQO1 PRDX6 MGST3 TNF PTGS2 PRXL2C SRXN1	NO
GO_CELLULAR_EXTRAVASATION	0.312046	0.717787	0.0873098	0.344999	1.10822	47	CD177 IL1R1 CX3CR1 ICAM1 BST1 TNF PDGFD ELANE RIPK3 CCR2 SIRPA PLCB1 CRK ITGA1 JAML PTAFR PODXL2 PECAM1 GCNT1 ITGB1	NO
GO_CELLULAR_GLUCOSE_HOMEOSTASIS	0.293578	0.698954	0.0850427	0.300134	1.08662	99	EFNA5 TRPM4 ADRA2A PPARGC1A BAD FOXO3 FKBP1B HK3 GPR27 GAS6 ICAM1 LRP1 NADK NDUFAF2 HMGN3 STXBP3 HK2 MPC2 ENY2 CYBA LGALS1 HIF1A HMGCR PIM3 PPP3CA RAP1A PTPRN2 IRS2 DYNLL1	NO
GO_CELLULAR_HORMONE_METABOLIC_PROCESS	0.539797	0.872542	0.0592219	0.294905	0.961041	51	CYP46A1 AKR1C1 PPARGC1A ADM AKR1C3 PDGFRA CYP1B1 PLB1 RDH5 DGAT2 CACNA1H HSD17B8 RDH14	NO
GO_CELLULAR_ION_HOMEOSTASIS	0.0252183	0.218896	0.352488	0.313503	1.29813	421	CCL8 S100A8 LPAR3 NTSR1 SLC25A27 SLC4A3 P2RY6 TRPM4 S100A9 LPAR1 TPT1 ABCG2 LPAR6 SLC8A1 SLC4A10 CLIC2 ADM C3AR1 LCN2 SELENOK KCNJ2 SLC4A1 FPR2 RAB39A CXCL10 ATP6V1G1 F2R PDGFRA ROGDI SCARA5 FPR3 CCR1 FPR1 DDIT3 TMEM165 PROK2 C5AR1 FKBP1B KCNMA1 ALAS2 SNCA CMKLR1 P2RX7 MT1E ANXA5 JAK2 GPR65 CD36 CCRL2 TRPC6 LYN CX3CR1 HMGB1 SLC11A1 ATP1B3 LTF MCOLN1 S1PR3 CXCR1 MICU2 TFR2 RHAG LRRK2 TESMIN LRP1 F…	NO
GO_CELLULAR_IRON_ION_HOMEOSTASIS	0.0419682	0.283407	0.266351	0.439712	1.43294	51	ABCG2 LCN2 ATP6V1G1 SCARA5 ALAS2 SLC11A1 LTF TFR2 FBXL5 PICALM FTH1 FTL TFRC NCOA4 SLC40A1 FLVCR1 EGLN1 HIF1A CYBRD1 SKP1 ATP6V1A NEDD8 SOD1 ATP6AP1	NO
GO_CELLULAR_KETONE_METABOLIC_PROCESS	0.0632911	0.337229	0.199915	0.342944	1.28784	143	CYP46A1 PSMA4 AKR1C1 PDK4 PSMA3 PPARGC1A ADM PSMA6 AKR1C3 PSMC6 TREX1 PSMA2 SIRT4 SLC7A7 SNCA PLIN5 PSMB9 NQO1 PRKAG2 STARD4 COQ10B ETFBKMT COQ3 ODC1 PSMC2 DGAT2 PSMB1 CACNA1H PSME2 OAZ1 PSMB8 KYAT3 PSME1 PANK2 OAZ2 GSTZ1 COQ2 GLO1 HMGCR PSMD10 PSMA1 IRS2 AZIN1 PSMD9 PSMB7 COQ5 SLC7A11 PDP1 PSMF1 CPT1A PSMD13 PSMB10 GPD2 COQ7 SRD5A1 PSMD4	NO
GO_CELLULAR_LIPID_CATABOLIC_PROCESS	0.953144	1	0.024779	0.195106	0.743676	156	LPL AKR1C3 DAGLA GDPD3 PLA2G4A PLIN5 ASAH1 CYP1B1 GM2A GBA ADTRP PRDX6 LRP1 GPCPD1 AIG1 ETFBKMT GALC ASAH2 AOAH PSAP NAGA ACOXL ACAA2 ABHD2 PNPLA8 GDE1 ACADM ACBD5 ACER3 SPHK1 ABHD5 BDH2 AUH HEXB ECHDC1 PPT1 PRKCD IDH1 IRS2 MGST2 CPT2 ALDH3A2 SLC27A2 ASAH2B ABCD3 ABHD3 CPT1A	NO
GO_CELLULAR_METABOLIC_COMPOUND_SALVAGE	0.885542	1	0.0382417	0.243352	0.707629	30	HPRT1 APIP HDDC2 PUDP GMPR GMPR2 AMPD2 TK2 UPP1 DCK	NO
GO_CELLULAR_MODIFIED_AMINO_ACID_BIOSYNTHETIC_PROCESS	0.260116	0.662783	0.145516	-0.326386	-1.14054	36	CHDH GAMT ALDH7A1 GGT7 MTHFD1L SHMT1 PTDSS2 MTHFD1	NO
GO_CELLULAR_MODIFIED_AMINO_ACID_METABOLIC_PROCESS	0.462279	0.831127	0.0718276	0.370031	1.01602	24	P4HA2 SULT1B1 APIP EGLN1 CPQ	NO
GO_CELLULAR_MONOVALENT_INORGANIC_CATION_HOMEOSTASIS	0.025664	0.220406	0.352488	0.419719	1.4825	80	SLC4A3 SLC8A1 SLC4A10 KCNJ2 SLC4A1 RAB39A ATP6V1G1 ROGDI TMEM165 KCNMA1 SLC11A1 ATP1B3 LRRK2 GPR89A GRN ATP6V1B2 DMXL2 SLC9B1 ATP6V1C1 ATP6V1E1 ATP1B2 ATP6V0E1 ATP6V1F ATP6V1D TCIRG1 PPT1 ATP6V0B CHP1 RAB20 CA2 ATP6V0C SLAMF8 ATP1B1 SNAPIN AVPR1A TM9SF4 ATP6V1A MAPK1 ATP6AP1 FASLG	NO
GO_CELLULAR_PIGMENTATION	0.760997	0.980329	0.0439759	0.263601	0.81925	41	BLOC1S2 BBS7 RAB32 ZEB2 BLOC1S6 BLOC1S1 CD63 HPS1 KIF13A DTNBP1 RAB27A RAB11A LYST RAB1A	NO
GO_CELLULAR_PROCESS_INVOLVED_IN_REPRODUCTION_IN_MULTICELLULAR_ORGANISM	0.0835322	0.37738	0.166934	0.318463	1.24651	194	SEMG1 INHBB FOLR3 RETN FOXC1 SPACA6 HMGB2 SLC26A8 PLPP3 RIMBP3C SPESP1 NECTIN3 CCNA1 MASTL TDRD1 CDYL UBE2B BRCA2 FOXO3 FOLR2 KDM1B SPIRE1 TDRD9 MYBL1 CYP26B1 SLIRP SRPK1 DMC1 TPGS1 HORMAD1 KIF18A PRDM1 ETV6 SPIRE2 CATSPER2 IQCG CEP57 SPAG16 SYCP2 FANCA AURKA ABHD2 BRIP1 TTC26 AGO4 PIWIL4 OSBP2 RIMBP3B TGFBR1 NCAPH PRKAR1A DLD PTX3 GDF9 SRC RARA PANK2 TUT7 CD9 HEXB	NO
GO_CELLULAR_PROTEIN_COMPLEX_DISASSEMBLY	0.255675	0.660956	0.0875697	0.28245	1.10473	193	FGF13 MAP1B DNAJC6 MRPS18C MRPL1 SPTA1 CAPZA2 SPTB MAP6D1 TWF1 MRPL13 MRPL47 PLEK MRPL52 MRPL40 MRPL36 CAPZA1 MRPS28 KIF18A MRPL3 BMERB1 ASPH GSPT1 MRPS33 MRPS22 MRPL58 MRPL50 MRPL41 SYNJ1 GADD45GIP1 CHCHD1 TMOD1 SEMA5A NAPA MAP1A MRPS7 MICAL2 MRPL11 MRPL44 SPAST MRPL45 MRPL18 NAPB AURKAIP1 KIF19 MRPL32 MRPL23 APC DSTN MRPL17 MRPL57 MRPL30 MRPS23 CCSAP EPS8 MRPL27 ABCE1 MRPL28 MRPS18A VPS4B GFM2 …	NO
GO_CELLULAR_PROTEIN_CONTAINING_COMPLEX_LOCALIZATION	0.988782	1	0.0359969	0.183259	0.494139	22	SGCD RALB TNFAIP2 MZT1 SNAPIN NACC2 EXOC8 EXOC1 WASL	NO
GO_CELLULAR_RESPIRATION	0.0016028	0.0361125	0.45506	0.402481	1.54771	171	NDUFB3 COX6C UQCRB NDUFA4 NDUFA5 PPARGC1A NDUFB1 PNPT1 NDUFA1 UQCRH UQCRHL TREX1 NDUFA6 UQCRQ COX7B SNCA NDUFS5 NDUFA3 MT-ND1 MT-ND2 NDUFA2 NDUFS4 COQ10B COX7C PRELID1 COX6A1 ETFRF1 NDUFAB1 NDUFAF2 NDUFB6 BLOC1S1 NDUFS6 MT-ND4 BID MT-ND4L COX5B UQCRC2 NDUFB5 COA6 DLD UQCC3 SLC25A14 ME3 HIF1A SUCLG1 UQCR10 PANK2	NO
GO_CELLULAR_RESPONSE_TO_ABIOTIC_STIMULUS	0.323733	0.729526	0.0730744	0.267604	1.06746	236	CASP5 RPL26 RAD51AP1 COPS9 CARD16 IL1B TLR5 MAP3K20 ERRFI1 YBX3 KCNJ2 TLR8 AQP1 TRIAP1 TREX1 TLR4 NAMPT CASP1 TLR3 BAD FAS DYSF KDM4D TANK MYD88 TLR7 IFI16 MCOLN1 ZFP36L1 FBXO4 GTF2H5 PTGS2 MAPK14 PTEN LIG4 FMR1 CASP3 CUL4B TNFRSF1A PDE2A MME CASP8 TNFSF14 PDE6B CYBA RHNO1 NEDD4 CDKN1A TENT2 PTAFR CASP8AP2 METAP2 PKD2 CHP1 HRAS DDX3X SLC12A6 GADD45A POLK SERPINB6 RAC1 MAP2K4 GCLC MDM2 AVPR1A XPA …	NO
GO_CELLULAR_RESPONSE_TO_ACID_CHEMICAL	0.149874	0.506467	0.124434	0.316656	1.18829	138	RORB FFAR3 P2RY6 AKR1C1 PDK4 PPARGC1A FFAR2 PDGFC AKR1C3 AQP1 PDGFRA CASTOR2 FOLR2 CYBB LAMTOR3 ABCA1 LYN CYP26B1 CEBPB CPEB4 PID1 CPEB3 LAMTOR5 PTK6 KLF4 TNF PDGFD DGAT2 PDGFB EDN1 SOCS1 RRAGC MYB CYBA TESC SESN3 KCNMB1 SRC RARA PTAFR ALDH1A2 FGFR2 CDK4 PKD2 ATP7A	NO
GO_CELLULAR_RESPONSE_TO_ALCOHOL	0.149378	0.505845	0.131458	0.365943	1.2457	63	EFNA5 P2RY6 AKR1C3 FOXO3 CYBB ABCA1 CDH1 GRAMD1B XRN1 ADAM15 KLF4 SPI1 PTEN KCNMB1 HMGCS1 BRCA1 CDK4 INHBA GRAMD1A CTNNA1	NO
GO_CELLULAR_RESPONSE_TO_ALKALOID	0.245192	0.649192	0.107554	0.434464	1.18282	23	AIF1 SLC8A1 PPARGC1A CRHBP ICAM1 CASP6 CASP3	NO
GO_CELLULAR_RESPONSE_TO_AMINO_ACID_STIMULUS	0.340087	0.744199	0.0824344	0.333712	1.0875	51	PDGFC PDGFRA CASTOR2 CYBB LAMTOR3 CEBPB CPEB4 CPEB3 LAMTOR5 TNF PDGFD SOCS1 RRAGC CYBA SESN3 ATP7A RRAGD GCLC SESN1 UBR2 OPA1 RRAGA	NO
GO_CELLULAR_RESPONSE_TO_AMMONIUM_ION	0.23494	0.634824	0.157403	-0.327361	-1.14738	38	AOC1 GNA11 PRKN AGRN CHRNA7 HCN3 CCNA2 ABL1 CHRM3	NO
GO_CELLULAR_RESPONSE_TO_ANTIBIOTIC	0.0520833	0.309339	0.224966	0.36259	1.3308	115	RPL23 EFNA5 IL18RAP LCN2 ANXA1 PDCD10 AQP1 PLA2G4A ARG1 FOXO3 TXN CYBB TRPC6 CYP1B1 NQO1 HGF AXL LRRK2 XRN1 KLF4 PDGFD SPI1 PPIF PDGFB PTEN PSAP RIPK3 TNFAIP3 MYB SIRPA SPHK1 KCNMB1 SRC EZH2 MAP3K5 RIPK1 NFE2L2 PRKCD ACTR2 PDE8A ATP7A	NO
GO_CELLULAR_RESPONSE_TO_ARSENIC_CONTAINING_SUBSTANCE	0.349754	0.75297	0.0878313	0.426075	1.10619	18	ATF3 ZFAND1 PPIF CPEB2 ZFAND2A GSTO1 DDX3X HMOX1 ZC3H12A ATF4	NO
GO_CELLULAR_RESPONSE_TO_BIOTIC_STIMULUS	0.000517595	0.0160222	0.477271	0.426576	1.65331	182	PLSCR4 LY96 IL1RN TNIP3 CHMP5 DEFA4 HMGB2 CARD16 IL1B PPARGC1A LCN2 LILRB1 FZD5 CXCL10 TLR4 CASP1 ARG1 PPBP DDIT3 DEFA1 MRC1 TLR2 PDCD1LG2 CD36 LDOC1 CD14 ABCA1 LYN CX3CR1 TFPI LY86 HMGB1 CD68 LTF CEBPB TLR6 KLRK1 HCK AXL ICAM1 TLR1 CXCL1 LITAF TNF TICAM2 NOD2 CD55 SASH1 MAPK14 ADAM9 IL18 TXNIP HAVCR2 RIPK2 LILRB2 SBNO2 CXCL5 PTPN22 ZFP36 TNFAIP3 DEFA3 TMCO1 SIRPA NFKBIA TNFRSF1B PYCARD CCR5 CARD8	YES
GO_CELLULAR_RESPONSE_TO_CADMIUM_ION	0.0775194	0.368587	0.199915	0.502402	1.40406	25	AKR1C3 MT1E CYBB SUMO1 UBE2D3 MT1X FOS ATP7A NCF1 CHUK MMP9 GSN SOD1 MAPK1 HMOX1	NO
GO_CELLULAR_RESPONSE_TO_CALCIUM_ION	0.816501	0.99833	0.0393562	0.236396	0.777069	52	CRHBP AKR1C3 ADGRV1 MEF2A MCOLN1 JUNB CPNE8 PPIF NCSTN IQGAP1 FOS EDN1	NO
GO_CELLULAR_RESPONSE_TO_CAMP	0.510574	0.854844	0.0639272	0.322606	0.97227	35	SLC8A1 HCN2 AQP9 CRHBP AQP1 ZFP36L1 KCNE1 PDE2A RAP1B PTAFR PKD2 RAP1A	NO
GO_CELLULAR_RESPONSE_TO_CARBOHYDRATE_STIMULUS	0.262402	0.666533	0.0911073	0.3079	1.11659	100	EFNA5 TRPM4 COLEC12 ADRA2A PPARGC1A BAD FOXO3 FKBP1B CLEC7A GPR27 CALCRL GAS6 ICAM1 ZFP36L1 LRP1 NADK NDUFAF2 HMGN3 MPC2 ENY2 CYBA MAP2K6 LGALS1 HIF1A HMGCR PIM3 PPP3CA RAP1A PTPRN2 IRS2 DYNLL1 MAP2K4 GCLC	NO
GO_CELLULAR_RESPONSE_TO_COPPER_ION	0.837209	1	0.0453152	0.277959	0.713302	17	AQP1 SNCA MT1E MT1X NFE2L2 ATP7A PRNP	NO
GO_CELLULAR_RESPONSE_TO_CORTICOSTEROID_STIMULUS	0.0441043	0.28891	0.321776	0.475099	1.49917	43	FECH ANXA1 ERRFI1 AKR1C3 AQP1 ARG1 FOXO3 DNMT3B EIF4EBP1 ICAM1 ZFP36L1 EDN1 CFLAR ZFP36	NO
GO_CELLULAR_RESPONSE_TO_DEXAMETHASONE_STIMULUS	0.0769231	0.367604	0.204295	0.526106	1.41859	22	FECH ERRFI1 AQP1 ARG1 DNMT3B EIF4EBP1 ICAM1	NO
GO_CELLULAR_RESPONSE_TO_DRUG	0.0719178	0.357116	0.176694	0.305471	1.22776	265	EFNA5 CHMP5 TRPM4 IL1B FECH AIF1 SLC8A1 IL18RAP PPARGC1A LCN2 ANXA1 ERRFI1 PDCD10 CRHBP AQP1 TREX1 ARG1 TLR3 BAD FOXO3 TXN CASTOR2 P2RX7 CD69 FOLR2 CYBB DNMT3B LDOC1 TRPC6 EIF4EBP1 CYP1B1 P2RY12 NQO1 CDH1 RNF149 GAS6 HGF AXL ICAM1 LRRK2 XRN1 ADAM15 KLF4 TNF PDGFD RGS10 NOD2 PTGS2 SPI1 RAP2A TFRC PPIF PDGFB PTEN PSAP RIPK3 RIPK2 FMR1 EDN1 PTPN22 CFLAR TNFAIP3 PDE2A MYB SIRPA CYBA PLCB1 SPHK1 CRK R…	NO
GO_CELLULAR_RESPONSE_TO_DSRNA	0.0059413	0.0893403	0.407018	0.659154	1.74268	20	COLEC12 IFIT1 RIOK3 TLR3 P2RX7 RALB FLOT1	NO
GO_CELLULAR_RESPONSE_TO_ESTRADIOL_STIMULUS	0.526059	0.864225	0.0661326	0.36131	0.955239	20	PPARGC1A FAM210B CRHBP KIF18A CFLAR	NO
GO_CELLULAR_RESPONSE_TO_EXOGENOUS_DSRNA	0.0250579	0.218683	0.352488	0.641439	1.61618	15	COLEC12 IFIT1 TLR3 RALB FLOT1	NO
GO_CELLULAR_RESPONSE_TO_EXTERNAL_STIMULUS	0.120729	0.454912	0.132846	0.294572	1.18371	262	CASP5 INHBB TRPM4 DSC2 IL1B TLR5 AIF1 PDK4 NPRL3 ATF3 LCN2 IL15 KCNJ2 TLR8 AKR1C3 KLF10 AQP1 TLR4 NAMPT CASP1 TLR3 BAD FAS ASGR1 CASTOR2 P2RX7 FOLR2 CYBB GABARAPL2 PMAIP1 GAS2L1 LYN GLUL P2RY12 MYD88 TLR7 GBA IFI16 CD68 GAS6 CPEB4 RALB HIGD1A AXL ICAM1 LRRK2 PTGS2 FBXO22 TXN2 SH3GLB1 GLRX2 RNF152 ATG5 FOS BRIP1 MAP1LC3B GABARAP TNFRSF1A RRAGC KANK2 PDE2A WIPI1 CASP8 TNFSF14 CDKN2B CYBA SESN3 FNIP…	NO
GO_CELLULAR_RESPONSE_TO_EXTRACELLULAR_STIMULUS	0.272515	0.677422	0.0828962	0.27808	1.09527	207	INHBB TRPM4 DSC2 AIF1 PDK4 NPRL3 ATF3 LCN2 IL15 AKR1C3 KLF10 NAMPT FAS ASGR1 CASTOR2 P2RX7 FOLR2 CYBB GABARAPL2 PMAIP1 GAS2L1 LYN GLUL P2RY12 GBA IFI16 CD68 GAS6 CPEB4 RALB HIGD1A AXL ICAM1 LRRK2 PTGS2 FBXO22 TXN2 SH3GLB1 GLRX2 RNF152 ATG5 FOS BRIP1 MAP1LC3B GABARAP RRAGC KANK2 WIPI1 CDKN2B CYBA SESN3 FNIP1 MAP1LC3B2 LAMP2 CDKN1A BMT2 WDR45 USF1 MAP3K5 PTPRC NFE2L2	NO
GO_CELLULAR_RESPONSE_TO_FATTY_ACID	0.0608014	0.331458	0.321776	0.476913	1.44982	37	FFAR3 P2RY6 PDK4 PPARGC1A FFAR2 AKR1C3 PID1 DGAT2 EDN1 SRC PTAFR CDK4	NO
GO_CELLULAR_RESPONSE_TO_FLUID_SHEAR_STRESS	0.275578	0.679161	0.10208	0.46122	1.16209	15	KLF4 PTGS2 SRC NFE2L2 PKD2 CA2 HDAC3 PTK2B MTSS1 MAPK7	NO
GO_CELLULAR_RESPONSE_TO_GAMMA_RADIATION	0.155039	0.514253	0.137251	0.454748	1.27088	25	RPL26 MAP3K20 TREX1 GTF2H5 CYBA HRAS MDM2 ZMPSTE24	NO
GO_CELLULAR_RESPONSE_TO_GLUCOSE_STARVATION	0.289157	0.693736	0.140406	-0.313828	-1.09994	38	BHLHA15 SIK1	NO
GO_CELLULAR_RESPONSE_TO_GROWTH_HORMONE_STIMULUS	0.29868	0.705495	0.0972151	0.455449	1.14755	15	PRLR JAK2 LYN LEPROT STAT3 JAK3 PXN	NO
GO_CELLULAR_RESPONSE_TO_HEAT	0.986928	1	0.0260438	0.184065	0.674016	112	MYOF RPA3 CXCL10 SCARA5 HSBP1 BAG1 LYN SUMO1 HSPA14 SLU7 HSPA6 PTGS2 BAG4 PTGES3 HIKESHI AKT1S1 CDKN1A HSPA1L HSP90AA1 TFEC PDCD6 DNAJB6 BAG5 NUP58 NUP98 MAPK1 HDAC2 NUP54 NUP50 HMOX1 HSPA8 NUP214	NO
GO_CELLULAR_RESPONSE_TO_HORMONE_STIMULUS	0.0948827	0.402129	0.146416	0.282103	1.17419	472	INHBB RORB EFNA5 FFAR3 P2RY6 LPL KL DNAAF4 ADRA2A IL1B ZNF366 FECH AIF1 AKR1C1 RBFOX2 PDK4 UMODL1 PPARGC1A ANXA1 FAM210B ERRFI1 CRHBP ACSL1 AKR1C3 RWDD1 AQP1 LEPR IGF2 SOCS3 PRLR ATP6V1G1 ARG1 FOXO3 STAT1 DEFA1 ADIPOR1 KAT2B RAB31 ANXA5 LMO2 JAK2 DNMT3B DNAJA1 GAS2L1 EIF4EBP1 LYN PTPRA TFPI TAF7 ADTRP PID1 KIF18A RNF14 ICAM1 OSBPL8 CYFIP1 RHOQ ZFP36L1 CTSS CTSL DUSP1 CTSB JUNB LATS2 RAB8B CTSH SO…	NO
GO_CELLULAR_RESPONSE_TO_HYDROGEN_PEROXIDE	0.0831063	0.376995	0.179782	0.37134	1.30799	78	IL18RAP LCN2 ANXA1 PDCD10 AQP1 ARG1 FOXO3 TXN TRPC6 CYP1B1 NQO1 HGF AXL LRRK2 KLF4 PDGFD PPIF PSAP RIPK3 TNFAIP3 MYB SIRPA SPHK1 SRC EZH2 MAP3K5 RIPK1 NFE2L2 PRKCD PDE8A	NO
GO_CELLULAR_RESPONSE_TO_INORGANIC_SUBSTANCE	0.3	0.707217	0.0813027	0.284887	1.07725	150	B2M XRCC4 PPARGC1A CRHBP AKR1C3 AQP1 ADGRV1 TREX1 BAD SNCA MT1E ANXA5 CYBB MEF2A NQO1 CDH1 MCOLN1 TFR2 SUMO1 LRRK2 JUNB UBE2D3 PTGS2 CPNE8 PPIF MT1X NCSTN SLFN14 IQGAP1 FOS LIG4 FMR1 SLC40A1 EDN1 CACNA1H CFLAR ADCY10	NO
GO_CELLULAR_RESPONSE_TO_INSULIN_STIMULUS	0.167277	0.535313	0.114751	0.303178	1.16237	165	INHBB FFAR3 LPL KL IL1B PDK4 ERRFI1 IGF2 SOCS3 ATP6V1G1 FOXO3 STAT1 ADIPOR1 KAT2B RAB31 EIF4EBP1 PTPRA PID1 OSBPL8 CYFIP1 RHOQ ZFP36L1 RAB8B SORBS1 AP3S1 PRKCI ATP6V1B2 PTEN GKAP1 PTPRE CFLAR SOCS1 ATP6V1C1 CPEB2 ATP6V1E1 ATP6V0E1 SP1 ATP6V1F SESN3 SRC ATP6V1D TCIRG1 USF1 APC CDK4 PRKCD ATP6V0B RAB10 ATP6V0C IRS2 FOXO4 RAB8A GAB1 NCK1 GCLC RPS6KB1 PAK1 ZNF106 ATP6V1A IGF1R ATP6AP1 OPA1 SRD5A1 PIK…	NO
GO_CELLULAR_RESPONSE_TO_INTERFERON_BETA	0.0541872	0.314924	0.248911	0.573362	1.48858	18	PNPT1 TREX1 TLR3 STAT1 MNDA IFI16 CDC34	NO
GO_CELLULAR_RESPONSE_TO_IONIZING_RADIATION	0.189488	0.570305	0.114751	0.35159	1.19684	63	RPL26 RAD51AP1 MAP3K20 TREX1 NAMPT KDM4D TANK IFI16 FBXO4 GTF2H5 MAPK14 LIG4 CYBA RHNO1 CDKN1A HRAS GADD45A	NO
GO_CELLULAR_RESPONSE_TO_KETONE	0.0311845	0.248799	0.352488	0.43979	1.50642	66	EFNA5 P2RY6 FECH ERRFI1 AKR1C3 RWDD1 AQP1 ARG1 FOXO3 DNMT3B EIF4EBP1 ICAM1 XRN1 ADAM15 KLF4	NO
GO_CELLULAR_RESPONSE_TO_LIGHT_STIMULUS	0.796247	0.99249	0.0377705	0.230661	0.821567	88	RPL26 COPS9 CARD16 AQP1 TRIAP1 TREX1	NO
GO_CELLULAR_RESPONSE_TO_LIPID	0.004409	0.0732419	0.407018	0.332475	1.37803	427	PLSCR4 RORB LY96 EFNA5 IL1RN TNIP3 FFAR3 CHMP5 P2RY6 DEFA4 DNAAF4 LPAR1 HMGB2 CARD16 IL1B ZNF366 FECH RBFOX2 PDK4 PPARGC1A LCN2 ANXA1 FAM210B IL15 ERRFI1 FFAR2 CRHBP AKR1C3 LILRB1 RWDD1 AQP1 CXCL10 TLR4 CASP1 ARG1 BAD PPBP FOXO3 DEFA1 MRC1 JAK2 TLR2 PDCD1LG2 CD36 DNMT3B DNAJA1 LDOC1 CD14 ABCA1 EIF4EBP1 LYN CX3CR1 TFPI LY86 HMGB1 CYP26B1 TAF7 CD68 LTF ADTRP CEBPB KLRK1 PID1 HCK KIF18A RNF14 AXL IC…	NO
GO_CELLULAR_RESPONSE_TO_LIPOPROTEIN_PARTICLE_STIMULUS	0.0426563	0.285907	0.321776	0.5475	1.5301	25	LPL TLR4 CD36 FCER1G ABCA1 MYD88 CD68 ADTRP TLR6	NO
GO_CELLULAR_RESPONSE_TO_MECHANICAL_STIMULUS	0.0506329	0.305139	0.237794	0.404973	1.36549	62	CASP5 IL1B TLR5 KCNJ2 TLR8 AQP1 TLR4 CASP1 TLR3 BAD FAS MYD88 TLR7 PTGS2 TNFRSF1A PDE2A CASP8 TNFSF14 CYBA	NO
GO_CELLULAR_RESPONSE_TO_NITROGEN_COMPOUND	0.00924004	0.121246	0.38073	0.314726	1.30633	451	RPL23 INHBB FFAR3 CHMP5 P2RY6 LPL TRPM4 KL COLEC12 IL1B AIF1 PDK4 SLC8A1 IFIT1 UMODL1 RIOK3 PPARGC1A HCN2 AQP9 ERRFI1 PDGFC CRHBP FPR2 KLF10 AQP1 TREX1 IGF2 SOCS3 TLR4 PRLR ATP6V1G1 NAMPT PDGFRA ARG1 TLR3 FOXO3 STAT1 SNCA CASTOR2 ADIPOR1 KAT2B RAB31 P2RX7 ANXA5 FOLR2 CYBB JAK2 LAMTOR3 CD36 LDOC1 EIF4EBP1 LYN PTPRA P2RY12 CDH1 CEBPB TLR6 CPEB4 RALB PID1 CPEB3 ICAM1 LRRK2 OSBPL8 CYFIP1 RHOQ ZFP36L1…	NO
GO_CELLULAR_RESPONSE_TO_NUTRIENT	0.376642	0.769065	0.0774768	0.328699	1.06021	49	TRPM4 IL15 CASTOR2 P2RX7 FOLR2 CYBB P2RY12 GAS6 PTGS2 BRIP1 KANK2 CDKN2B CYBA USF1 NCOA1 MDM2 TRIM24 SOD1 FES OPA1 P2RY1 VDR HMOX1	NO
GO_CELLULAR_RESPONSE_TO_ORGANIC_CYCLIC_COMPOUND	0.0712743	0.355274	0.172324	0.294657	1.21638	393	RORB EFNA5 MSR1 P2RY6 TRPM4 DNAAF4 COLEC12 IL1B ZNF366 FECH AIF1 RBFOX2 SLC8A1 IFIT1 RIOK3 PPARGC1A HCN2 AQP9 ANXA1 FAM210B IL15 ERRFI1 CRHBP AKR1C3 ALPL RWDD1 AQP1 ARG1 TLR3 FOXO3 STAT1 DEFA1 SNCA P2RX7 FOLR2 JAK2 P2RY13 DNMT3B DNAJA1 ABCA1 EIF4EBP1 CYP1B1 TFPI P2RY12 TAF7 CDH1 ADTRP CEBPB RALB KIF18A RNF14 ICAM1 LRRK2 GRAMD1B ZFP36L1 XRN1 FLOT1 KLF5 KLF4 TNF UFM1 NOD2 PTGS2 PADI2 IL18 PDGFB CDK…	NO
GO_CELLULAR_RESPONSE_TO_OSMOTIC_STRESS	0.0468278	0.29626	0.257206	0.494524	1.43181	29	ERRFI1 YBX3 AQP1 BAD DYSF ZFP36L1 PTGS2 CASP3 PKD2 DDX3X SLC12A6 SERPINB6	NO
GO_CELLULAR_RESPONSE_TO_OXIDATIVE_STRESS	0.0322209	0.254282	0.271289	0.331534	1.32425	239	AIF1 NME8 IL18RAP PPARGC1A LCN2 ANXA1 PNPT1 FZD1 PDCD10 AKR1C3 MGST1 RWDD1 AQP1 TREX1 TLR4 FBXO7 PDGFRA ARG1 ROMO1 FOXO3 TXN SNCA PRDX5 CYBB EPAS1 JAK2 CD36 TRPC6 CYP1B1 NQO1 TLR6 PRDX6 HGF AXL LRRK2 GSKIP FBXW7 DIABLO KLF4 TNF PDGFD RBM11 PPIF PSAP GLRX2 RIPK3 SRXN1 VRK2 FOS CFLAR TNFAIP3 MYB CPEB2 SIRPA CYBA SPHK1 CRK NCF2 MCL1 VNN1 HIF1A SRC EZH2 TXNRD1 MAP3K5 RIPK1 NFE2L2 NCF4 PRKCD PKD2 ARL6…	NO
GO_CELLULAR_RESPONSE_TO_OXYGEN_LEVELS	0.0142527	0.157747	0.38073	0.36964	1.43174	181	S100B LPAR1 PSMA4 CARD16 SLC8A1 PSMA3 PPARGC1A BNIP3L PSMA6 RBX1 AQP1 RPS27A PSMC6 ATP6V1G1 NAMPT BAD PSMA2 SIRT4 FAS FOXO3 PSMB9 CYBB EPAS1 MPL PMAIP1 DNMT3B TRPC6 EIF4EBP1 BACH1 CPEB4 HIGD1A ICAM1 ZFP36L1 PTGS2 ELOB PSMC2 PTEN ACAA2 PSMB1 ELOC BRIP1 EDN1 CFLAR RBPJ CPEB2 PSME2 EGLN1 PSMB8 KCNMB1 HIF1A SRC PSME1 NFE2L2 CHCHD2 RWDD3 ATP7A PSMD10 PSMA1 NPEPPS CBL PSMD9 PSMB7 MALAT1 PSMF1 PGK1 MDM2…	NO
GO_CELLULAR_RESPONSE_TO_OXYGEN_RADICAL	0.878489	1	0.0425878	0.266993	0.693175	18	CD36 NQO1 TNF GLRX2 NFE2L2 ATP7A SOD1 FANCC GCH1 PARK7	NO
GO_CELLULAR_RESPONSE_TO_PEPTIDE	0.0119514	0.142187	0.38073	0.34067	1.36981	269	RPL23 INHBB FFAR3 CHMP5 LPL KL IL1B PDK4 UMODL1 ERRFI1 CRHBP FPR2 KLF10 IGF2 SOCS3 TLR4 PRLR ATP6V1G1 NAMPT ARG1 FOXO3 STAT1 ADIPOR1 KAT2B RAB31 ANXA5 JAK2 CD36 LDOC1 EIF4EBP1 LYN PTPRA TLR6 PID1 ICAM1 OSBPL8 CYFIP1 RHOQ ZFP36L1 LRP1 CASP4 SNX6 KLF5 KLF4 RAB8B SORBS1 AP3S1 PRKCI NOD2 ATP6V1B2 PTEN GKAP1 AGTRAP CDK5 PTPRE RIPK2 BRIP1 EDN1 PTPN22 CFLAR SOCS1 ATP6V1C1 CPEB2 ATP6V1E1 CYBA ATP6V0E1 SP…	NO
GO_CELLULAR_RESPONSE_TO_PEPTIDE_HORMONE_STIMULUS	0.119767	0.453281	0.135002	0.300106	1.19036	222	INHBB FFAR3 LPL KL IL1B PDK4 UMODL1 ERRFI1 CRHBP IGF2 SOCS3 PRLR ATP6V1G1 ARG1 FOXO3 STAT1 ADIPOR1 KAT2B RAB31 ANXA5 JAK2 EIF4EBP1 LYN PTPRA PID1 OSBPL8 CYFIP1 RHOQ ZFP36L1 RAB8B SORBS1 AP3S1 PRKCI ATP6V1B2 PTEN GKAP1 AGTRAP PTPRE BRIP1 EDN1 CFLAR SOCS1 ATP6V1C1 CPEB2 ATP6V1E1 CYBA ATP6V0E1 SP1 ATP6V1F CRK SESN3 PRKAR1A RAP1B SRC ATP6V1D TCIRG1 USF1 APC NFE2L2 CDK4 LEPROT PRKCD ATP6V0B RAB10 CA2 …	NO
GO_CELLULAR_RESPONSE_TO_RADIATION	0.789141	0.990406	0.0353911	0.224816	0.844923	141	RPL26 RAD51AP1 COPS9 CARD16 MAP3K20 AQP1 TRIAP1 TREX1 NAMPT KDM4D TANK IFI16 FBXO4 GTF2H5 PTGS2 MAPK14 LIG4 FMR1 CUL4B MME PDE6B CYBA RHNO1 NEDD4 CDKN1A TENT2 METAP2 HRAS GADD45A POLK MDM2 XPA ZMPSTE24 NPM1 PPEF1 OPN3 PPID SFRP2 IMPACT BMF TLK2 GRK4 ECT2 RHBDD1 BAX TSPYL5 ATF4 FNTA	NO
GO_CELLULAR_RESPONSE_TO_REACTIVE_NITROGEN_SPECIES	0.455446	0.827989	0.0739901	0.395398	0.996249	15	PPARGC1A AQP1 CFLAR CRK MAP3K5 GUCY1B1	NO
GO_CELLULAR_RESPONSE_TO_REACTIVE_OXYGEN_SPECIES	0.043257	0.288014	0.245042	0.357231	1.33675	131	NME8 IL18RAP LCN2 ANXA1 PDCD10 AKR1C3 AQP1 TREX1 PDGFRA ARG1 ROMO1 FOXO3 TXN PRDX5 CD36 TRPC6 CYP1B1 NQO1 HGF AXL LRRK2 KLF4 TNF PDGFD PPIF PSAP GLRX2 RIPK3 FOS CFLAR TNFAIP3 MYB SIRPA SPHK1 CRK SRC EZH2 MAP3K5 RIPK1 NFE2L2 PRKCD PKD2 PRDX3 PDE8A ATP7A NCF1 CHUK ZNF277 GUCY1B1 MDM2 MMP9 SOD1 MAPK1 TPM1 FANCC HDAC2 PINK1 IMPACT	NO
GO_CELLULAR_RESPONSE_TO_RETINOIC_ACID	0.612717	0.914396	0.0880945	-0.258088	-0.901879	36	WNT11 LEP WNT5B	NO
GO_CELLULAR_RESPONSE_TO_STARVATION	0.457847	0.829306	0.0618406	0.27127	0.999012	122	INHBB DSC2 PDK4 NPRL3 ATF3 AKR1C3 KLF10 FAS GABARAPL2 PMAIP1 GAS2L1 GLUL GBA IFI16 GAS6 CPEB4 RALB HIGD1A LRRK2 FBXO22 SH3GLB1 RNF152 ATG5 MAP1LC3B GABARAP RRAGC WIPI1 SESN3 FNIP1 MAP1LC3B2 LAMP2 CDKN1A BMT2 WDR45 MAP3K5 NFE2L2	NO
GO_CELLULAR_RESPONSE_TO_STEROID_HORMONE_STIMULUS	0.335366	0.73995	0.0741759	0.274887	1.06472	183	RORB DNAAF4 ZNF366 FECH RBFOX2 PPARGC1A ANXA1 ERRFI1 AKR1C3 RWDD1 AQP1 ARG1 FOXO3 DEFA1 JAK2 DNMT3B DNAJA1 EIF4EBP1 TFPI TAF7 ADTRP RNF14 ICAM1 ZFP36L1 UFM1 PADI2 CDK7 NCOA4 ABHD2 EDN1 WBP2 CFLAR ZFP36 KANK2 DEFA3	NO
GO_CELLULAR_RESPONSE_TO_STEROL	0.641196	0.92778	0.0576091	0.338163	0.8678	17	ABCA1 GRAMD1B INSIG1 HMGCS1 INHBA GRAMD1A MLC1	NO
GO_CELLULAR_RESPONSE_TO_TOPOLOGICALLY_INCORRECT_PROTEIN	0.4375	0.812672	0.144631	-0.230205	-1.00277	138	BHLHA15 DERL3 CREB3L4 WFS1 CCND1 PLA2G4B PRKN DDX11 ARFGAP1 HSPA1B MYDGF HSP90B1 PDIA5 BAG3 LMNA CTH ASNS TSPYL2 BOK TATDN2 CUL7	NO
GO_CELLULAR_RESPONSE_TO_TOXIC_SUBSTANCE	0.137303	0.484882	0.128143	0.308604	1.19318	179	HBB S100A9 HBA2 HBA1 IL18RAP HP CLIC2 PPARGC1A LCN2 ANXA1 PDCD10 MGST1 AQP1 ARG1 BAD FOXO3 TXN PRDX5 CYBB CD36 TRPC6 CYP1B1 NQO1 PRDX6 HGF AXL LRRK2 XRN1 MGST3 KLF4 TNF PDGFD PTGS2 SPI1 ABTB2 PPIF PRXL2C PDGFB PTEN PSAP RIPK3 SRXN1 TNFAIP3 MYB GSTO1 SIRPA SPHK1 PXDNL KCNMB1 SRC EZH2 TXNRD1 MAP3K5 RIPK1 NFE2L2 GSTZ1 PRKCD PRDX3 PDE8A ATP7A	NO
GO_CELLULAR_RESPONSE_TO_UV	0.446866	0.822483	0.0653834	0.290494	1.00233	68	RPL26 COPS9 CARD16 AQP1 TRIAP1 TREX1	NO
GO_CELLULAR_RESPONSE_TO_VASCULAR_ENDOTHELIAL_GROWTH_FACTOR_STIMULUS	0.185351	0.564199	0.121543	0.420859	1.24654	32	FOXC1 GAS1 NRP1 ANXA1 CADM4 PDGFRA DLL1 MAPK14 CD63	NO
GO_CELLULAR_RESPONSE_TO_VIRUS	0.401773	0.787672	0.0747385	0.331291	1.04417	44	RIOK3 BAD LGALS9 VWCE TSPAN6 BIRC2 DDX60 GSDME MAPK14 FMR1	NO
GO_CELLULAR_RESPONSE_TO_VITAMIN	0.681934	0.944427	0.0755015	-0.295895	-0.852962	18	LEP BGLAP	NO
GO_CELLULAR_RESPONSE_TO_XENOBIOTIC_STIMULUS	0.00599979	0.0900526	0.407018	0.425416	1.54173	98	S100A12 CYP46A1 FECH AIF1 APOBEC3A AKR1C1 SLC8A1 PPARGC1A ERRFI1 CES1 CRHBP ACSL1 MGST1 AQP1 ARG1 CBR3 DNMT3B EIF4EBP1 CYP1B1 CYP26B1 NQO1 NQO2 SULT1B1 ICAM1 NAT1 MGST3	NO
GO_CELLULAR_SENESCENCE	0.46933	0.834866	0.0652353	0.304198	1.00423	54	ARG2 NUAK1 PNPT1 PLK2 NAMPT MAPK14 BCL6 CDKN2B CDKN1A PRKCD CGAS HRAS WNT16 EEF1E1 ZNF277 KRAS ZMPSTE24 CDKN2A RSL1D1 OPA1 NEK4 NEK6 RBL1 YPEL3 MAP3K3 ID2	NO
GO_CELLULAR_TRANSITION_METAL_ION_HOMEOSTASIS	0.0127347	0.146693	0.38073	0.444558	1.5745	82	S100A8 S100A9 ABCG2 LCN2 ATP6V1G1 SCARA5 ALAS2 MT1E SLC11A1 LTF TFR2 FBXL5 PICALM FTH1 FTL TFRC MT1X NCOA4 SLC40A1 FLVCR1 SLC39A8 EGLN1 SLC31A2 SLC30A1 HIF1A SLC30A9 CYBRD1 ATP7A SKP1 SLC31A1 SLC39A6 PRNP ATP6V1A NEDD8 SOD1 ATP6AP1	NO
GO_CELL_ADHESION_MEDIATED_BY_INTEGRIN	0.977918	1	0.0681513	-0.180617	-0.676437	49	SERPINE1 FBN1 ADA CCN3 PIEZO1 PLAU PODXL SWAP70 ITGB5 ITGB7	NO
GO_CELL_ADHESION_MEDIATOR_ACTIVITY	0.427746	0.804572	0.109684	-0.290294	-1.01442	36	DSG2 DSP NRCAM EMILIN1 KRT18 ROBO3 PDLIM1 BAIAP2 PAK4	NO
GO_CELL_ADHESION_MOLECULE_BINDING	0.881004	1	0.0223699	0.204164	0.840497	368	RPL34 CD177 MMP14 NLGN4Y NRG1 CHMP5 OLFM4 NRXN3 IL1B NRXN1 ANXA1 TACSTD2 NECTIN3 CNN3 IGF2 SHTN1 CTNNAL1 TWF1 STAT1 TXNDC9 S100P AFDN EPS8L1 RPL24 TENM4 CLIC1 ZC3H15 LYN PCMT1 HMGB1 CDH1 CAPZA1 NUMB S1PR3 ANLN TRIM25 PRDX6 PTPRM ICAM1 EIF2A EIF3E PLIN3 CD1D S100A11 ITGB1BP2 ADAM15 PICALM UBAP2 SNX2	NO
GO_CELL_AGING	0.80589	0.995901	0.0371479	0.226514	0.807634	87	ARG2 NUAK1 PNPT1 PLK2 RWDD1 NAMPT ROMO1 BRCA2 ICAM1 MORC3 MAPK14 PTEN BCL6 MME CDKN2B CDKN1A PRKCD CGAS HRAS WNT16 EEF1E1 ZNF277 KRAS ZMPSTE24 NPM1 SOD1 CDKN2A RSL1D1 OPA1 NEK4 NEK6 RBL1 YPEL3 MAP3K3	NO
GO_CELL_BODY	0.26674	0.669594	0.0806388	0.264316	1.08476	359	NTSR1 S100B MYO10 MAP1B SLC25A27 CAMK2N1 TRPM4 LPAR1 NRP1 ANXA3 AIF1 C4A SLC4A10 GLRX5 PPARGC1A NRXN1 PJVK CNNM1 SORT1 GNAO1 KCNJ2 CRHBP KNDC1 KCND3 WDFY3 SLC1A3 CNN3 FZD5 RIN1 SHTN1 ROGDI ARG1 LSM1 MOB4 SIAH2 C9orf72 SNCA P2RX7 CYBB MPL TLR2 RPS6 GLUL CX3CR1 ZNF804A SRR P2RY12 NQO1 MT-ND1 SERPINI1 LRRK2 NPTXR CYFIP1 XRN1 LRP1 SLC2A3 SEZ6L PICALM RDH5 RGS10 ACSL4 RAB5A TXN2 SMN2 GLRX2 CDK5 AURKA …	NO
GO_CELL_CELL_ADHERENS_JUNCTION	0.473901	0.83581	0.0629395	0.286509	0.995969	72	PGM5 PARD3B DSC2 ANXA1 NECTIN3 CNN3 AFDN LYN CDH1 LRRC7 PTPRM S100A11 FLOT1 SORBS1 AJAP1	NO
GO_CELL_CELL_ADHESION_MEDIATED_BY_CADHERIN	0.719269	0.961769	0.0522693	0.318165	0.81648	17	AFDN CDH1 SERPINF2 NEXMIF FLOT1	NO
GO_CELL_CELL_ADHESION_MEDIATOR_ACTIVITY	0.285294	0.690466	0.1396	-0.331669	-1.07931	29	DSG2 DSP NRCAM KRT18 ROBO3 PDLIM1 BAIAP2 PAK4 CD200	NO
GO_CELL_CELL_ADHESION_VIA_PLASMA_MEMBRANE_ADHESION_MOLECULES	0.106355	0.427429	0.153159	0.33786	1.24425	122	CD177 EFNA5 IL1RN DSC2 PCDHGC3 NTNG2 ANXA3 CEACAM8 PCDH12 NRXN1 PCDHGB3 FAT1 NECTIN3 PCDHGB5 CLDN12 IGSF11 PCDHGB4 PCDHGA10 TENM4 PALLD CDH1 PCDHGA5 PTPRM PCDHGA12 IL1RAP ICAM1	NO
GO_CELL_CELL_CONTACT_ZONE	0.0554765	0.31771	0.227987	0.429548	1.41199	52	FGF13 PGM5 DSC2 SLC8A1 KCNJ2 CADM4 NECTIN3 SCN1B ANKRD23 VAMP5 AFDN RAP2C FLOT1 AJAP1	NO
GO_CELL_CELL_JUNCTION	0.636054	0.925149	0.0404114	0.231902	0.936384	290	FGF13 COL17A1 PGM5 COL13A1 PARD3B POF1B DSC2 CDC42BPA SLC8A1 FRMD4A PCDH12 ANXA1 YBX3 KCNJ2 CADM4 LIN7A TACSTD2 FAT1 EPB41L3 NECTIN3 CNN3 CLDN12 FZD5 IGSF11 SCN1B TWF1 ANKRD23 VAMP5 MARVELD2 P2RX7 AFDN TRPC6 PMP22 LYN CDH1 PLEKHG5 LRRC7 PTPRM RAP2C PCDHGA12	NO
GO_CELL_CELL_JUNCTION_ASSEMBLY	0.343173	0.747314	0.142901	-0.266877	-1.04642	69	WNT11 LSR UGT8 FSCN1 CDHR3 MYO1C CDH24 PRKCA DLG5 PATJ ARVCF ARL2 TBCD HDAC7 CDH2 FBF1 NPHP4 PARD6B	NO
GO_CELL_CELL_JUNCTION_ORGANIZATION	0.0835927	0.37738	0.287805	-0.306107	-1.25091	94	WNT11 DSG2 DSP LSR SDK2 UGT8 PERP WHRN PLEKHA7 LIMS2 FSCN1 CDHR3 MYO1C CDH24 PRKCA SDK1 DLG5 PATJ F2RL1 ARVCF ARL2 TBCD HDAC7 CDH2 FBF1 NPHP4 PARD6B	NO
GO_CELL_CELL_RECOGNITION	0.675556	0.943422	0.0498907	0.281859	0.867661	39	FOLR3 LGALS3 SPESP1 FOLR2 EPHB1 CATSPER2 HAVCR2 ATP8B3 CCT2 CATSPER1 ADAM20 CD9 HSPA1L	NO
GO_CELL_CELL_SIGNALING_BY_WNT	0.954023	1	0.152145	-0.177592	-0.869977	369	WNT11 SDC1 WNT10A ARHGEF19 DEPDC1B GPRC5B CCNE1 CELSR1 PKD1 DACT1 BCL9L BICC1 GLI1 WNT5B CCND1 DIXDC1 FUZ NKD1 PRKN BAMBI TCF7 ESR1 LZTS2 IGFBP4 NFATC1 PTK7 TRABD2A AXIN2 WNT7A CBY1 DAAM2 LRP6 RBMS3 DVL2 PYGO2 TLE1 MET ABL1 TNRC6C FOXP3 MOV10 WNT10B PTPN23 LEF1 JRK ROR1 WWOX ITGA3 CCAR2 PIAS4 CCDC88C CSNK1E EGR1 INVS SKI KANK1 FZD8 LGR4 RUVBL1 PRICKLE1 PAF1 CDH2 NPHP4 GRK5 ZNRF3 DVL3 ASPM SMARCA4…	NO
GO_CELL_CHEMOTAXIS	4.01786e-05	0.00209706	0.557332	0.436205	1.70208	191	CCL8 S100A8 S100A12 DOCK4 IL1RN CCL3L1 TRPM4 S100A9 LPAR1 HMGB2 NRP1 IL1B AIF1 LGALS3 C3AR1 ANXA1 FFAR2 HSD3B7 FPR2 SBDS CXCL10 PDGFRA CCR1 PPBP CKLF C5AR1 DYSF DEFA1 CMKLR1 LGALS9 EPHB1 CCRL2 FCER1G LYN CX3CR1 HMGB1 MTUS1 PLEKHG5 CXCR1 GAS6 CXCL16 C5 KLRK1 HGF MPP1 BST1 CXCL1 CXCR2 PLA2G7 DUSP1 ADGRE2 PDGFD PADI2 ITGA9 MAPK14 CSF3R PDGFB ELMO2 SEMA5A CCR2 MOSPD2 RHOG EDN1 CXCL5	NO
GO_CELL_COMMUNICATION_BY_ELECTRICAL_COUPLING	0.46798	0.834672	0.0723571	0.382641	0.993423	18	SLC8A1 FKBP1B CALM2 ATP1B2 PKP2 ATP1B1	NO
GO_CELL_COMMUNICATION_BY_ELECTRICAL_COUPLING_INVOLVED_IN_CARDIAC_CONDUCTION	0.242424	0.645403	0.111463	0.472194	1.19566	16	SLC8A1 FKBP1B CALM2 ATP1B2 PKP2 ATP1B1 ATP1A3 PRKACA PDE4D	NO
GO_CELL_COMMUNICATION_INVOLVED_IN_CARDIAC_CONDUCTION	0.512048	0.855597	0.0636424	0.331774	0.971376	31	TRPM4 DSC2 SLC8A1 SCN1B FKBP1B RNF207	NO
GO_CELL_CORTEX	0.588098	0.901203	0.0453152	0.241161	0.953003	218	RTKN INSC MYO10 PARD3B GMFG DLC1 SPTA1 CAPZA2 MYO6 MARCKS SLC4A1 SPTB ARV1 SNCA MYL12B SPIRE1 RHOU TRIP10 CDH1 CAPZA1 ANLN ASPH RHOQ MPP1 WASHC1 GYPC CD302 EPB42 FLOT1 SPIRE2 EXOC6 EEF1A1 TMOD1 AGTRAP EPB41 RHOG CLTB MTSS2 PLS1 GMFB TNFAIP2 FLOT2 CTBP2 PSEN1 DCTN4 PARD3 BFSP1 NEDD4 CTSZ RHOBTB3 DSTN ERMN FGFR2 CDC42 PKD2 RAB10 RHOC ACTR2 EPS8	NO
GO_CELL_CORTEX_PART	0.762581	0.981297	0.0380056	0.232815	0.860305	123	RTKN GMFG DLC1 SPTA1 CAPZA2 SLC4A1 SPTB ARV1 MYL12B CDH1 CAPZA1 ANLN ASPH MPP1 WASHC1 GYPC EPB42 FLOT1 EXOC6 EEF1A1 TMOD1 EPB41 CLTB MTSS2 PLS1 GMFB TNFAIP2 FLOT2 CTBP2 CTSZ DSTN PKD2 RAB10 ACTR2	NO
GO_CELL_CORTEX_REGION	0.440341	0.815745	0.10673	-0.312394	-1.004	28	SAPCD2 UNC13A EPB41L2 NUMA1 GNAI1 CTBP1 DCTN1	NO
GO_CELL_CYCLE_ARREST	0.0933806	0.400132	0.156312	0.314954	1.23688	198	HMGN5 RPL23 RPL26 GAS1 TCF7L2 MAP3K20 PNPT1 STRADB PLK2 TRIAP1 DDIT3 NBN KIF20B KLLN KAT2B EVI2B LAMTOR3 GAS2L1 RHEB GAS6 PRKAG2 LAMTOR5 PPM1A DUSP1 PRR11 CDKN2D GADD45GIP1 ZNF268 CDK7 CCNK CDK5 NOTCH2 IFNG AURKA TFDP1 RRAGC MTBP CDKN1C CDKN2B E2F8 PPP2R5B MAP2K6 TGFBR1 PLAGL1 ZFHX3 CDKN1A ZBTB49 ZNF385A CGRRF1 APC BRCA1 CDK4 DDIAS PKD2 HRAS CARM1 INHBA GADD45A PRKAG1 CUL5 FOXO4 RRAGD PA2G4	NO
GO_CELL_CYCLE_CHECKPOINT	0.75	0.974699	0.12564	-0.198083	-0.903479	198	CDC20 PLK1 ZWINT ORC1 CDC45 TRIP13 CCND1 BUB1 ANAPC15 HUS1B XRCC3 TIMELESS GTSE1 CDC6 TNKS1BP1 CENPF MRNIP WEE1	NO
GO_CELL_CYCLE_DNA_REPLICATION	0.957447	1	0.0751182	-0.185585	-0.724374	64	CDC45 GINS1 RAD51 POLD1 NUGGC WDR18 RTEL1 POLD2 E2F7 POLE WIZ DBF4B LIG1 CDT1	NO
GO_CELL_CYCLE_G1_S_PHASE_TRANSITION	0.989583	1	0.0188533	0.178611	0.709473	226	RPL26 AIF1 POLE2 RPA3 CCNE2 ANXA1 PLK2 CCNA1 TRIAP1 FBXO7 RHOU EIF4EBP1 TRIM71 BACH1 GSPT1 BCAT1 KIF14 FBXW7 KLF4 CDC34 LATS2 CDKN2D TMEM14B RBBP8 PTEN CDK7 AURKA TFDP1 BID CUL4B KANK2 MTBP PSME2 CDKN2B CDC7 PLCB1 E2F8 PLAGL1 CACUL1 CDKN1A E2F6 PSME1 ZNF385A EZH2 RIPK1 POLE4 MNAT1 CDK4 ORC5 PKD2 CARM1 DDX3X PPP3CA INHBA GADD45A CUL5 SPDYA RCC1 GMNN ITGB1 RPS6KB1 MDM2 CDKN2C	NO
GO_CELL_CYCLE_G2_M_PHASE_TRANSITION	0.997699	1	0.0179363	0.163759	0.654902	245	CCNB3 PSMA4 PSMA3 HAUS1 PSMA6 RBX1 SMARCD3 PHLDA1 MASTL PSMC6 PSMA2 NBN PPP1CB PSMB9 HAUS4 BACH1 SYF2 KIF14 OPTN TUBA1A ATAD5 PSMC2 MIIP CDK7 CEP57 CEP70 AURKA PSMB1 NAE1 CALM2 CCP110 PSME2 CDKN2B CDC7 HAUS6 PPP2R2A PLCB1 PSMB8 CEP63 FBXL15 RAB11A CDKN1A BRCC3 PSME1 MNAT1 BRCA1 CDK4 HSP90AA1 DYRK3 CEP135 SKP1 PSMD10 PPME1 PSMA1 FOXO4 PSMD9 PSMB7 DYNLL1 LCMT1 VPS4B PSMF1 HAUS7 PPP1R12A PSMD13 NPM1…	NO
GO_CELL_DEATH_IN_RESPONSE_TO_HYDROGEN_PEROXIDE	0.500808	0.850052	0.0681513	0.363932	0.971471	21	PDCD10 FOXO3 TXN HGF LRRK2 PSAP RIPK1 NFE2L2 PDE8A	NO
GO_CELL_DEATH_IN_RESPONSE_TO_OXIDATIVE_STRESS	0.152473	0.510556	0.129443	0.360066	1.23334	66	FZD1 PDCD10 TLR4 FBXO7 FOXO3 TXN JAK2 CYP1B1 TLR6 HGF LRRK2 GSKIP FBXW7 DIABLO PSAP MCL1 VNN1 HIF1A MAP3K5 RIPK1 NFE2L2 PRKCD ARL6IP5 PDE8A SLC7A11 BAG5	NO
GO_CELL_DIFFERENTIATION_INVOLVED_IN_EMBRYONIC_PLACENTA_DEVELOPMENT	0.0697674	0.352929	0.21925	0.57104	1.46541	17	STK3 FZD5 SOCS3 ASCL2 PRDM1 GCM1 CASP8 E2F8 EOMES KRT8 DNAJB6	NO
GO_CELL_DIFFERENTIATION_INVOLVED_IN_KIDNEY_DEVELOPMENT	0.914729	1	0.0380842	0.234326	0.664907	27	STAT1 WWTR1 BASP1 PDGFB IQGAP1 ACTA2 LAMB2	NO
GO_CELL_DIFFERENTIATION_IN_SPINAL_CORD	0.981912	1	0.0583453	-0.17517	-0.510808	19	OLIG2	NO
GO_CELL_DIVISION	0.145528	0.498866	0.249247	-0.222745	-1.10442	494	MDK SPC24 NKX3-1 CDC20 KIF2C SAPCD2 OR2A4 SOX5 BIRC5 FGF2 NEK2 UBE2C PLK1 ZWINT CEP55 CCNB2 CCNE1 CDC25A CDCA2 HAUS5 ORC6 CDCA3 MICAL3 KIFC1 CCNF MACC1 STOX1 CCND1 KIF18B BUB1 DIXDC1 RAB11FIP3 ANAPC15 TP63 VEGFB TIMELESS HOXB4 CDC6 PTTG1 LZTS2 SPTBN1 INCENP CENPF EPB41L2 WEE1 KIF20A SPOUT1 KLHL22 FAM83D SKA1 WNT7A MAPRE3 CNTROB CCNA2 SGO1 MAD1L1 MYC KIF11 ANAPC2 NUMA1 ERCC2 CHMP7 ERCC6L KLHL13 NC…	NO
GO_CELL_DIVISION_SITE	0.410774	0.79447	0.122679	-0.268757	-1.01886	55	OR2A4 CEP55 RAB11FIP3 PSD TUBGCP6 KIF20A PLK4 WDR73 HMCN1 MEN1 PITPNM1	NO
GO_CELL_FATE_COMMITMENT	0.264323	0.668913	0.0905429	0.302763	1.11167	117	SATB2 FGF13 NRG1 GAS1 NRP1 TCF7L2 SOX6 TBX6 SH3PXD2B ISL2 TENM4 EPAS1 BATF CYP26B1 LOXL3 IL23R CEBPB DLL1 PRDM1 ETS2 GCM1 KLF4 TBX19 FKBP8 NOTCH2 CASP3 MITF IFRD1 RBPJ	NO
GO_CELL_FATE_DETERMINATION	0.409241	0.793929	0.0795565	0.411264	1.03623	15	CYP26B1 DLL1 KLF4 NOTCH2 IFRD1 MCL1	NO
GO_CELL_FATE_SPECIFICATION	0.424806	0.803151	0.0743625	0.371157	1.03727	25	NRP1 SOX6 TBX6 ISL2 TENM4 DLL1 FKBP8 RBPJ PSEN1 APC EOMES ITGB1 SFRP2 LMO4 NOTCH1 AR	NO
GO_CELL_GROWTH	0.644444	0.92927	0.0388759	0.230933	0.941899	329	FGF13 S100A8 LPAR3 SEMA3D MMP14 EFNA5 MAP1B CDKL3 IGFBP3 SPOCK1 MEG3 S100A9 FSTL4 NRP1 SEMA3A EPB41L3 SEMA3C SEMA6B SEMA4A SHTN1 C9orf72 ADIPOR1 RGS2 SLIT1 BST2 CHPT1 CXCL16 TNFRSF12A WASF1 RAPH1 CYFIP1 LRP1 KIAA1109 KIF14 SGK3 ADAM15 CDKN2D OSGIN2 ZEB2 DRAXIN BCL6 MAP3K13 CDK5 SEMA5A AURKA TAF9 SEMA3B RTN4 IQGAP1 EDN1 IFRD1	NO
GO_CELL_JUNCTION_ASSEMBLY	0.700122	0.951771	0.0395172	0.233408	0.892543	162	COL17A1 MMP14 KRT5 EFNA5 POF1B NRP1 DLC1 EPB41L3 FMN1 FZD5 MARVELD2 AFDN VMP1 DUSP3 CDH1 CAPZA1 SDC4 LRP1 FLOT1 TNF SORBS1 PRKCI TRIP6 PTEN	NO
GO_CELL_JUNCTION_ORGANIZATION	0.627198	0.920318	0.0425878	0.236558	0.930529	202	CD177 COL17A1 MMP14 KRT5 EFNA5 XIRP2 POF1B RASSF8 NRP1 DLC1 EPB41L3 NECTIN3 FMN1 FZD5 F2R MARVELD2 AFDN VMP1 DUSP3 CDH1 CAPZA1 NUMB SDC4 LRP1 FLOT1 TNF RAB8B SORBS1 PRKCI	NO
GO_CELL_KILLING	0.0097968	0.125207	0.38073	0.423166	1.54232	110	SEMG1 S100A12 DEFA4 DNASE1L3 LAG3 B2M IL18RAP LILRB1 RPL30 KIR3DL1 ARG1 HPRT1 ROMO1 BAD LYZ DEFA1 P2RX7 LGALS9 CLEC12B CAMP PGLYRP1 GZMB LTF IL23R KLRK1 ICAM1 CD1D TYROBP VAMP7 CTSH CD160 IL18 ELANE HAVCR2 SH2D1A IFNG RIPK3 DEFA3 ITGAM CRK RAB27A FCGR2B HLA-F BCL2L11 CTSC LYST PTPRC CEBPG	NO
GO_CELL_LEADING_EDGE	0.223831	0.617619	0.0911073	0.272172	1.10844	311	CD177 S100B MYO10 AIF1 CDC42BPA BSPRY DLC1 LAMP5 MYO6 WASF3 TIAM2 CADM4 FAT1 PLEK2 EPB41L3 ARPC3 ADGRV1 SHTN1 TWF1 DYSF IFIT5 MEFV EPS8L1 S100A6 PLEK SRGAP2 PALLD AKAP5 SAMSN1 FGR FGD4 CDH1 PLEKHG5 TNFRSF12A PTPRM KIF18A WASF1 RAPH1 CYFIP1 ARPC5 S100A11 PTK6 FGD2 FLOT1 FRMD4B FGD6 SCIMP ADGRE2 KLHL2 VAMP7 ARPIN SNX2 ARPC2 PRKCI CCDC88A RAB5A EEF1A1 STX3 ATP6V1B2 ITSN1 SH3RF1	NO
GO_CELL_MATRIX_ADHESION	0.381953	0.772483	0.0683111	0.273756	1.04137	154	COL17A1 MMP14 EFNA5 COL13A1 BCAM NRP1 DLC1 FMN1 HPSE EDA CD36 ITGA10 DUSP3 SDC4 LRP1 BST1 SIGLEC1 NEXMIF ADAM15 SORBS1 AJAP1 ADAM9 TRIP6 PTEN BCL6 CDK5 ZYX CD63 IQGAP1 LYVE1 TEK ITGAV NINJ1 DDR2 TMEM8B	NO
GO_CELL_MATURATION	0.116798	0.448357	0.146416	0.338697	1.23503	107	SEMG1 C3 SLC26A8 NTN4 TBX6 C1QA FAM210B IL15 FZD5 B4GALT5 BRCA2 FOXO3 EPAS1 SCLT1 DMC1 AXL LRRK2 TRIM58 KIF14 EPB42 CATSPER2 MAP3K13 SLFN14 AURKA B4GALT6 ABHD2 FLVCR1 CDKN1C DLD BFSP1 HIF1A TAL1 CDKN1A ADGRB3 TUT7	NO
GO_CELL_MIGRATION_INVOLVED_IN_SPROUTING_ANGIOGENESIS	0.456884	0.829062	0.0694481	0.331074	1.00646	37	NRP1 ANXA1 PDCD10 PLK2 STARD13 ADTRP FBXW7 KLF4 PTGS2	NO
GO_CELL_MORPHOGENESIS_INVOLVED_IN_DIFFERENTIATION	0.219641	0.611247	0.0891647	0.263511	1.10127	489	FGF13 LPAR3 SEMA3D S100B EFNA5 MAP1B CDKL3 NEFL RAP1GAP POF1B OLFM4 FSTL4 NTNG2 NRP1 NRXN3 SEMA3A RBFOX2 DOCK1 NTN4 NRXN1 ZNF365 CHN1 SPTA1 ISL2 KNDC1 TACSTD2 FAT1 SEMA3C SEMA6B SEMA4A MELTF SLC1A3 VIT SHTN1 HPRT1 B4GALT5 SPTB SCN1B C9orf72 RPL24 S100A6 MEF2A MPL EPHB1 SRGAP2 PALLD SLIT1 TRPC6 PTPRA MERTK OMG DOK4 NUMB HRH2 TNFRSF12A PTPRM ARL13B AXL LRRK2 C1GALT1C1 RAPH1 CYFIP1 LRP1 B4GAT1 DOCK5…	NO
GO_CELL_MORPHOGENESIS_INVOLVED_IN_NEURON_DIFFERENTIATION	0.257361	0.661022	0.0822055	0.263771	1.08492	386	FGF13 LPAR3 SEMA3D S100B EFNA5 MAP1B CDKL3 NEFL RAP1GAP FSTL4 NTNG2 NRP1 NRXN3 SEMA3A RBFOX2 NTN4 NRXN1 ZNF365 CHN1 SPTA1 ISL2 KNDC1 SEMA3C SEMA6B SEMA4A SLC1A3 SHTN1 HPRT1 B4GALT5 SPTB SCN1B C9orf72 RPL24 S100A6 MEF2A EPHB1 PALLD SLIT1 TRPC6 PTPRA OMG DOK4 NUMB TNFRSF12A PTPRM LRRK2 RAPH1 CYFIP1 LRP1 B4GAT1 NEXN PLXNC1 PICALM FLOT1 VAMP7 GORASP1 ZEB2 SSH2 RAP2A PLXNA2 DRAXIN PTEN XK FBXO45 EFNA1…	NO
GO_CELL_PART_MORPHOGENESIS	0.415682	0.798212	0.0574877	0.245979	1.02118	452	FGF13 LPAR3 SEMA3D S100B EFNA5 MAP1B CDKL3 NEFL RAP1GAP FSTL4 NTNG2 NRP1 NRXN3 SEMA3A RBFOX2 NTN4 NRXN1 ZNF365 CHN1 SPTA1 ISL2 PNPT1 STRADB KNDC1 EPB41L3 SEMA3C SEMA6B SEMA4A SHTN1 HPRT1 B4GALT5 SPTB KIF20B SCN1B C9orf72 RPL24 S100A6 MEF2A EPHB1 SRGAP2 PALLD SLIT1 TRPC6 PTPRA OMG SLIRP DOK4 NUMB TNFRSF12A PTPRM PID1 WASF1 LRRK2 RAPH1 CYFIP1 NEK3 LRP1 B4GAT1 NEXN PLXNC1 PICALM FLOT1 VAMP7 ARPIN SN…	NO
GO_CELL_PROJECTION_ASSEMBLY	0.535906	0.869522	0.045679	0.23678	0.981889	437	LPAR3 RSPH9 MYO10 DNAAF4 RAP1GAP IFT81 LPAR1 NRP1 AIF1 BBOF1 NME8 DYNC2LI1 HAUS1 CFAP53 CCDC65 CDKL1 WASF3 TACSTD2 PLEK2 SHTN1 SPATA6 MAK DISC1 UBE2B TWF1 RAB23 RSPH4A WWTR1 POC1B SNX10 P2RX7 EPS8L1 ARMC9 HAUS4 ATG3 DZIP1L RHOU SRGAP2 BBS7 PMP22 SCLT1 P2RY12 SRGAP2C FGD4 ANLN CDC42EP3 TPGS1 CCDC66 ARL13B GAS8 ICAM1 CYFIP1 RHOQ WASHC1 RILP TMEM67 TUBA1A FGD2 TMEM107 KLF5 FGD6 ARPC2 SSH2 CCDC88A RA…	NO
GO_CELL_PROJECTION_MEMBRANE	0.946199	1	0.0222268	0.197008	0.775955	207	MYO10 ITLN1 AIF1 DLC1 LAMP5 MYO6 PEMT PLEK2 EPB41L3 AQP1 ADGRV1 TWF1 IFIT5 S100P EPS8L1 EVC PLEK CA4 CD36 AKAP5 BBS7 P2RY12 FGR PLB1 ARL13B PLAUR TMEM67 FGD2 SCIMP ADGRE2 ARPC2	NO
GO_CELL_RECOGNITION	0.350543	0.753474	0.0774768	0.301104	1.06711	85	FOLR3 COLEC12 NRP1 SEMA3A LGALS3 PCDH12 SPESP1 VCAN CNTNAP3 FOLR2 CLEC7A EPHB1 PALLD CD36 TNFRSF21 FCN1 NEXN CATSPER2 HAVCR2 SEMA5A RTN4 CASP3 ATP8B3 CCT2 ROBO1 CATSPER1 ADAM20 EMB BSG NPTN CD9 HSPA1L	NO
GO_CELL_REDOX_HOMEOSTASIS	0.0513889	0.30727	0.234393	0.411065	1.39557	64	NME8 GLRX5 GLRX DDIT3 TXN TXNDC9 PRDX5 CYBB SLC11A1 PRDX6 TMX1 SH3BGRL3 TXN2 GLRX2 TXNDC16 CYBA TXNDC12 DLD NCF2 TXNRD1 TMX3 NFE2L2 NCF4 PRDX3 NCF1 ERP44 TXNL1 GCLC	NO
GO_CELL_SUBSTRATE_ADHESION	0.0901734	0.393659	0.157403	0.307909	1.22513	229	COL17A1 MMP14 EFNA5 COL13A1 SPOCK1 OLFM4 BCAM NRP1 DOCK1 DLC1 TACSTD2 FMN1 MELTF VIT HPSE EDA JAK2 EPHB1 SRGAP2 CD36 ITGA10 DUSP3 MERTK GAS6 TNFRSF12A SDC4 AXL EMILIN2 LRP1 BST1 DOCK5 SIGLEC1 KIF14 VAMP3 NEXMIF ADAM15 ARPC2 SORBS1 AJAP1 ADAM9 TRIP6 PTEN EFNA1 BCL6 CDK5 ZYX CD63 AP1AR IQGAP1 LYVE1 TEK ITGAV NINJ1 DDR2 TMEM8B LGALS1 CRK AKIP1 ITGA1	NO
GO_CELL_SUBSTRATE_JUNCTION	0.145993	0.499402	0.116739	0.280582	1.14976	353	RPL23 COL17A1 RPL7 PGM5 MMP14 RPS3A XIRP2 RPS7 RPS17 RPL9 NRP1 B2M DLC1 RPL27 RPL31 ANXA1 FZD1 MARCKS FAT1 RPL30 ARPC3 CNN3 TWF1 PPP1CB RPS18 ANXA5 JAK2 LAMTOR3 RHOU PALLD SCARB2 RPS29 ARHGAP26 NUMB RPL5 HCK SDC4 WASF1 ICAM1 MPZL1 CYFIP1 ARPC5 LRP1 PLAUR RPS11 NEXN CD59 FLOT1 STARD8 ARPC2 SORBS1 RPS10 AFAP1 ADAM9 PTPN12 TRIP6 NCSTN ZYX IQGAP1 RHOG RPS8 TEK IGF2R MME RPL4 RPL22 ITGAV DCAF6 CD46 CY…	NO
GO_CELL_SUBSTRATE_JUNCTION_ASSEMBLY	0.170833	0.542727	0.122108	0.342904	1.19517	75	COL17A1 MMP14 KRT5 EFNA5 NRP1 DLC1 FMN1 DUSP3 SDC4 LRP1 SORBS1 TRIP6 PTEN IQGAP1 TEK	NO
GO_CELL_SURFACE_RECEPTOR_SIGNALING_PATHWAY_INVOLVED_IN_CELL_CELL_SIGNALING	0.852941	1	0.184706	-0.183778	-0.902341	415	WNT11 SDC1 CACNB3 WNT10A STX1A ARHGEF19 IGSF9B DEPDC1B GPRC5B CCNE1 DMPK CELSR1 PKD1 DACT1 BCL9L NPFF BICC1 GLI1 WNT5B CCND1 DIXDC1 FUZ NKD1 PRKN BAMBI TCF7 ESR1 P2RX5 LZTS2 IGFBP4 NFATC1 PTK7 TRABD2A CHRNA7 AXIN2 WNT7A CBY1 DAAM2 ADORA2A LRP6 RBMS3 DVL2 PYGO2 TLE1 PPP1R9A MET ABL1 TNRC6C FOXP3 MOV10 WNT10B LEF1 JRK ROR1 WWOX ITGA3 CCAR2 PIAS4 CCDC88C CSNK1E EGR1 NLGN3 INVS SKI KANK1 FZD8 MPP2 LG…	NO
GO_CELL_VOLUME_HOMEOSTASIS	0.319871	0.72546	0.0919686	0.418655	1.11755	21	AQP1 KCNMA1 P2RX7 CLNS1A SLC12A3 SLC12A6 SLC12A9	NO
GO_CENTRAL_NERVOUS_SYSTEM_NEURON_AXONOGENESIS	0.381395	0.771951	0.0799859	0.382033	1.06767	25	B4GALT5 SCN1B EPHB1 ZEB2 PTEN FBXO45 B4GALT6 HSP90AA1 NFIB	NO
GO_CENTRAL_NERVOUS_SYSTEM_NEURON_DEVELOPMENT	0.471533	0.835188	0.0661326	0.31106	1.00331	49	NRP1 SEMA3A SLC4A10 HPRT1 B4GALT5 UQCRQ SCN1B EPHB1 ZEB2 PTEN FBXO45 CDK5 B4GALT6 ROBO1 CRK FGFR2 HSP90AA1 ATP7A NFIB	NO
GO_CENTRAL_NERVOUS_SYSTEM_NEURON_DIFFERENTIATION	0.167112	0.535178	0.120985	0.334204	1.19504	91	SATB2 SPOCK1 NRP1 SEMA3A SLC4A10 ISL2 FZD1 KNDC1 HPRT1 B4GALT5 UQCRQ SCN1B EPHB1 AGTPBP1 ZEB2 DRAXIN PTEN FBXO45 CDK5 B4GALT6 ROBO1 CRK PSEN1 C21orf91 TAL1 FGFR2 HSP90AA1 EOMES CSF1R ATP7A INHBA NFIB	NO
GO_CENTRAL_NERVOUS_SYSTEM_PROJECTION_NEURON_AXONOGENESIS	0.558923	0.882452	0.0647943	0.368861	0.934004	16	SCN1B EPHB1 ZEB2 FBXO45 NFIB	NO
GO_CENTRIOLAR_SATELLITE	0.355742	0.756958	0.119888	-0.340621	-1.0688	25	PLK1 KRT18 CEP72 CEP131	NO
GO_CENTRIOLE	0.110169	0.435371	0.282013	-0.286315	-1.21131	113	SAXO2 WDR90 PLK1 CEP55 CCNF HSPA1B TSKS CBY1 CCDC120 STARD9 PLK4 KIF24 CROCC CEP250 CNTROB CCDC92 NEURL4 NUBP2 WDR62 HERC2 ODF2 TUBG1 FBF1 DCTN1 CEP41 CEP83 CEP89	NO
GO_CENTRIOLE_ASSEMBLY	0.984894	1	0.0333827	0.192722	0.580827	35	PLK2 STIL KAT2B CCP110 CHMP2A CEP63 BRCA1 CEP135 VPS4B NPM1 TRIM37	NO
GO_CENTROMERE_COMPLEX_ASSEMBLY	0.838415	1	0.041321	0.247742	0.748685	36	CENPQ CENPN CENPI CENPS SENP6 CENPP MIS18BP1 ITGB3BP MIS12	NO
GO_CENTROSOME	0.873016	1	0.190023	-0.184283	-0.908166	455	CDC20 KIF2C MACROD2 NEK2 SPATC1L PLK1 CEP55 CCNB2 CDKL2 CCNE1 NDN HAUS5 CDC45 EEF1AKMT3 CCNF NINL STOX1 PLEKHA7 KRT18 RAB11FIP3 MTUS2 HOXB4 CEP72 LZTS2 TUBGCP6 CENPF MVB12A KAT2A SPPL2B PROCR CHD3 IFT27 USP20 SPOUT1 DDX11 HSPA1B KLHL22 AXIN2 PLK4 FBXO31 CROCC CEP250 CNTROB SGO1 MAD1L1 NUMA1 CHEK1 CCDC92 POLR3H HASPIN KATNAL1 CEP131 RITA1 BICDL1 NUBP2 NIT2 TRAF5 CUL7 HOOK2 SMAD7 GNAI1 MZT2A B9D2 T…	NO
GO_CENTROSOME_DUPLICATION	0.942254	1	0.0321428	0.202209	0.677703	60	CHMP5 PLK2 BRCA2 STIL KAT2B TMEM67 CHMP2B CCP110 CHMP2A CEP63 BRCA1 CEP135 PKD2 USP33 VPS4B NPM1 TRIM37 CHMP1B CHMP3 NUBP1 ARHGEF10 MDM1 CEP295NL CHMP4B	NO
GO_CERAMIDE_BIOSYNTHETIC_PROCESS	0.316401	0.722251	0.08654	0.34288	1.10141	47	B3GALT2 B4GALT5 P2RX7 ASAH1 GBA P2RX1 TNF UGCG ST6GALNAC3 ASAH2 B4GALT6 SPTLC2 TNFRSF1A SPTSSA DEGS1 NSMAF ST8SIA4 SAMD8 PRKCD SGMS2	NO
GO_CERAMIDE_CATABOLIC_PROCESS	0.0774411	0.368587	0.208955	0.558992	1.41544	16	ASAH1 GM2A GBA GALC ASAH2 PSAP NAGA ACER3 HEXB PRKCD ASAH2B NEU1 GLA	NO
GO_CERAMIDE_METABOLIC_PROCESS	0.95114	1	0.0385579	0.229108	0.60572	20	ST6GALNAC3 ASAH2 NSMAF PPP2CA FUT7 ORMDL1 ITGB8	NO
GO_CEREBELLAR_CORTEX_DEVELOPMENT	0.639053	0.926513	0.0870516	-0.266585	-0.896365	33	MDK WHRN GLI1	NO
GO_CEREBELLAR_CORTEX_MORPHOGENESIS	0.530945	0.866917	0.0656814	0.358606	0.94809	20	ZNF365 KNDC1 AGTPBP1 DLL1 KIF14 CDK5	NO
GO_CEREBELLAR_PURKINJE_CELL_LAYER_DEVELOPMENT	0.378738	0.770335	0.0840746	0.413193	1.06034	17	UQCRQ AGTPBP1 DLL1 KIF14 SEZ6L ATP7A RERE	NO
GO_CEREBRAL_CORTEX_CELL_MIGRATION	0.0193224	0.189186	0.352488	0.539456	1.5619	29	FGF13 NRP1 SEMA3A SRGAP2 P2RY12 SRGAP2C BMERB1 FBXO45 CDK5 RTN4 FUT10 ROBO1 PSEN1	NO
GO_CEREBRAL_CORTEX_DEVELOPMENT	0.290323	0.69518	0.0870516	0.314542	1.11101	80	FGF13 BCL2A1 NEFL NRP1 SEMA3A BAD SRGAP2 P2RY12 SRGAP2C BMERB1 LRP1 KIF14 NOTCH2NLA TMEM14B FBXO45 CDK5 RTN4 FUT10 ROBO1 PLCB1 CRK PSEN1 HIF1A	NO
GO_CEREBRAL_CORTEX_RADIALLY_ORIENTED_CELL_MIGRATION	0.327362	0.732602	0.0911073	0.426396	1.12731	20	SRGAP2 P2RY12 SRGAP2C BMERB1 FBXO45 CDK5 RTN4 FUT10	NO
GO_CGMP_MEDIATED_SIGNALING	0.763547	0.981463	0.0489954	0.299814	0.778386	18	RUNDC3A AQP1 CD36 PDE2A PRKAR1A CGAS GUCY1B1 PTK2B	NO
GO_CHANNEL_INHIBITOR_ACTIVITY	0.934884	1	0.0370705	0.227121	0.634734	25	SCN1B FKBP1B VAMP8 CALM2 VTI1B SLC30A1 NEDD4	NO
GO_CHANNEL_REGULATOR_ACTIVITY	0.671196	0.941624	0.0462303	0.250168	0.886594	85	FGF13 GEM NRXN1 KCNS1 SCN1B FKBP1B SCLT1 SUMO1 SGK3 VAMP8 CNIH3 INAFM1 KCNE1 CALM2 KCNMB4 VTI1B CABP4 ADRB2 KCNMB1 SLC30A1 NEDD4 TSPAN13 KCNE3 PKP2 CHP1	NO
GO_CHAPERONE_BINDING	0.541161	0.873102	0.0558265	0.268892	0.951242	83	PFDN4 TIMM9 HSPE1 BAG1 DNAJB4 SCARB2 DNAJA1 BIRC2 RNF207 DNAJC3 GRN DNAJC1 CDC37L1 TIMM10 BAG4 PTGES3 TBCA FNIP1 CTSC SACS ATP7A ST13 FNIP2 DNAJB6 BAG5 PFDN6 PRNP SOD1	NO
GO_CHAPERONE_COFACTOR_DEPENDENT_PROTEIN_REFOLDING	0.295385	0.700791	0.0937465	0.400673	1.15021	28	HSPE1 BAG1 DNAJB4 HSPA14 HSPA6 TOR1A PTGES3 HSPA1L ST13 DNAJB14 HSPA8 ERO1A	NO
GO_CHAPERONE_COMPLEX	0.643411	0.929001	0.0793435	-0.305063	-0.889584	19	BAG3 PPP5C CCT6B TSC1 CCT3 HSP90AB1	NO
GO_CHAPERONE_MEDIATED_PROTEIN_COMPLEX_ASSEMBLY	0.646962	0.930614	0.0566484	0.33225	0.862597	18	HOPX PTGES3 CCT2 BBS10 BBS12 HSP90AA1 PFDN6	NO
GO_CHAPERONE_MEDIATED_PROTEIN_FOLDING	0.475783	0.836679	0.0645031	0.302033	0.994131	53	HSPE1 FKBP1B BAG1 DNAJB4 HSPA14 HSPA6 FKBP5 TOR1A SGTB PTGES3 CCT2 HSPA1L ST13 DNAJB14 DNAJC5 PPID FKBP1A SGTA HSPA8 ERO1A	NO
GO_CHEMICAL_SYNAPTIC_TRANSMISSION_POSTSYNAPTIC	0.222591	0.615856	0.170932	-0.303384	-1.14818	54	CACNB3 STX1A IGSF9B DMPK NPFF P2RX5 CHRNA7 WNT7A ADORA2A PPP1R9A	NO
GO_CHEMOKINE_ACTIVITY	0.0160294	0.171305	0.352488	0.662116	1.69913	17	CCL8 CCL3L1 CXCL10 PPBP CKLF CXCL16 C5 CXCL1 CXCL5 CCL4 CCL5	NO
GO_CHEMOKINE_BINDING	0.613846	0.91446	0.0560596	0.309548	0.888615	28	ACKR1 CCR1 CCRL2 CX3CR1 HMGB1 CXCR1 CXCR2 CCR2 ZFP36 ITGAV CCR5 CXCR6 PLP2	NO
GO_CHEMOKINE_PRODUCTION	0.000702758	0.0199485	0.477271	0.533666	1.79941	62	S100A8 FFAR3 ARG2 LPL S100A9 IL1B AIF1 SELENOK FFAR2 ACKR1 TLR4 TLR3 MEFV LGALS9 TLR2 TLR7 C5 LRP1 KLF4 TNF IL18 ELANE HAVCR2 RIPK2	NO
GO_CHEMOKINE_RECEPTOR_BINDING	0.0029725	0.0566077	0.431708	0.638865	1.75418	24	CCL8 CCL3L1 CXCL10 PPBP CKLF STAT1 CCRL2 CXCL16 C5 CXCL1 CCR2 CXCL5 CCL4 CCL5	NO
GO_CHEMOKINE_SECRETION	0.132013	0.47593	0.155242	0.536501	1.35177	15	LPL AIF1 SELENOK C5 LRP1 TNF PYCARD MCOLN2	NO
GO_CHEMOREPELLENT_ACTIVITY	0.0454545	0.292612	0.276501	0.598118	1.51451	16	SEMA3D EFNA5 NRG1 SEMA3A SEMA3C SEMA6B SEMA4A	NO
GO_CHLORIDE_CHANNEL_ACTIVITY	0.117829	0.450552	0.159647	0.481101	1.34453	25	ANO5 SLC26A8 CLIC2 GABRR2 BEST1 CLIC1	NO
GO_CHLORIDE_TRANSMEMBRANE_TRANSPORT	0.161145	0.525669	0.132147	0.434465	1.27204	31	SLC26A8 CLIC2 GABRR2 SLC4A1 SLC1A3 BEST1 CLIC1	NO
GO_CHLORIDE_TRANSMEMBRANE_TRANSPORTER_ACTIVITY	0.0168588	0.175757	0.352488	0.514411	1.57228	38	SLC18A1 ANO5 SLC26A8 CLIC2 GABRR2 SLC4A1 BEST1 CLIC1 SLC22A1	NO
GO_CHLORIDE_TRANSPORT	0.0294928	0.241629	0.352488	0.473489	1.49682	45	ANO5 P2RY6 SLC26A8 SLC4A10 CLIC2 GABRR2 SLC4A1 SLC1A3 BEST1 CLIC1	NO
GO_CHOLESTEROL_EFFLUX	0.224868	0.618138	0.15017	-0.390273	-1.18865	22	APOM PLTP ABCA7 SCARB1 SREBF2	NO
GO_CHOLESTEROL_STORAGE	0.0354778	0.264183	0.321776	0.620165	1.56257	15	MSR1 LPL CD36 ABCA1 STARD4	NO
GO_CHONDROCYTE_DEVELOPMENT	0.325397	0.730748	0.122108	-0.35618	-1.08482	22	COL7A1 COL6A3 AXIN2 SERPINH1 SMPD3 EIF2AK3 MATN2 RARG COL6A2	NO
GO_CHONDROCYTE_DIFFERENTIATION	0.0967742	0.406282	0.276501	-0.340356	-1.31973	63	SOX5 COL7A1 CCN2 WNT5B LOXL2 COL6A3 CCN3 AXIN2 WNT7A SERPINH1 WNT10B GPLD1 SMPD3 ZNF219 MEF2D EIF2AK3 MATN2 ANXA6 GLG1 RARG COL6A2 FGFR1	NO
GO_CHONDROCYTE_DIFFERENTIATION_INVOLVED_IN_ENDOCHONDRAL_BONE_MORPHOGENESIS	0.0909091	0.3943	0.237794	-0.508016	-1.40789	15	COL7A1 COL6A3 AXIN2 SERPINH1 SMPD3 MATN2 ANXA6 RARG COL6A2	NO
GO_CHONDROITIN_SULFATE_BIOSYNTHETIC_PROCESS	0.784053	0.988775	0.0483118	0.300081	0.770074	17	VCAN CHSY1 CHST7 CHST15 CSGALNACT2 DSE	NO
GO_CHONDROITIN_SULFATE_PROTEOGLYCAN_BIOSYNTHETIC_PROCESS	0.809446	0.995901	0.0459538	0.280796	0.742375	20	VCAN CHSY1 CHST7 CHST15 CSGALNACT2 DSE B3GAT1	NO
GO_CHONDROITIN_SULFATE_PROTEOGLYCAN_METABOLIC_PROCESS	0.826923	1	0.0442407	0.272593	0.73502	22	VCAN CHSY1 CHST7 CHST15 CSGALNACT2 DSE B3GAT1 DSEL	NO
GO_CHROMATIN	0.957143	1	0.170932	-0.175207	-0.86341	407	STAG3 CBX2 PLK1 NR1D1 MTA1 DNTT DPF3 IRF4 LOXL2 KMT5C RAD51 TP63 TCF7 TIMELESS PAWR ESR1 TNKS1BP1 INCENP CENPF KAT2A MCM2 NFATC1 UHRF1 SLX4 JUN CHD3 DDX11 BEND3 PELP1 ESCO2 TRIM28 XRCC1 CBX7 SMARCA1 DNMT3A L3MBTL1 MYC CHMP7 CBX8 CHEK1 NCAPD3 EHMT2 CDCA5 DFFB MCM7 PPARD SMARCC2 POLR3G EME2 SWI5 SMARCB1 KIF22 EXOSC5 MEN1 PML IPO4 NUFIP1 CCAR2 INO80B TCF3 HMGA1 MORC2 SRCAP ENC1 SETD1A CBX5 ASXL1 TRR…	NO
GO_CHROMATIN_ASSEMBLY	0.977901	1	0.0293519	0.184117	0.644041	76	HMGB2 HAT1 NAP1L2 CENPQ CENPN CENPI SMCHD1 CENPS	NO
GO_CHROMATIN_ASSEMBLY_OR_DISASSEMBLY	1	1	0.0252713	0.155861	0.565226	100	HMGB2 HAT1 NAP1L2 SMARCD3 CENPQ CENPN CENPI SMCHD1 CENPS PADI2 NFE2 CENPP MIS18BP1	NO
GO_CHROMATIN_BINDING	0.984375	1	0.176694	-0.15404	-0.753629	399	STPG4 STAG3 CBX2 ORC1 MTA1 CDC45 PWWP3A GLI1 RAD51 NRL TP63 AJUBA ESR1 CENPF MRNIP KAT2A EXO1 POLD1 PRDM11 NFATC1 UHRF1 BAHD1 CABIN1 JUN DDX11 PELP1 TRIM28 PYGO2 SMARCA1 DNMT3A BAHCC1 L3MBTL1 NCAPD3 EHMT2 CDCA5 SREBF1 TRIM66 HCFC1 LEF1 APBB1 SUPT5H SMARCC2 SMARCB1 AUTS2 MEN1 THRA POLG UBTF ELK1 GRWD1 HMGA1 MORC2 PCLAF EGR1 ING5 CBX5 ASXL1 POLE PAF1 BRD3 PATZ1 HDAC7 MTA3 CDT1 NOC2L SMARCA4 SHMT2 M…	NO
GO_CHROMATIN_DISASSEMBLY	0.653944	0.933382	0.0776799	-0.30068	-0.866756	18	MAP1S SMARCC2 SMARCB1 GRWD1 HMGA1 SMARCA4	NO
GO_CHROMATIN_DNA_BINDING	0.199176	0.58201	0.111011	0.34713	1.18903	66	HMGN5 PRDM5 PPARGC1A FOXO3 KDM4D PRDM1 BCL6 HMGN3 WBP2 GATA1 HMGN4 UTY EZH2 RARA HMGN2 GRHL1 RCC1 JMJD1C SUZ12 STAT3 HDAC2	NO
GO_CHROMATIN_ORGANIZATION_INVOLVED_IN_REGULATION_OF_TRANSCRIPTION	0.947802	1	0.0306323	0.199018	0.691831	72	HAT1 SIRT4 UBE2B ELOF1 HMGB1 SMCHD1 PADI2 ZNFX1 RESF1 MIER1 MSL3 PCGF1	NO
GO_CHROMATIN_REMODELING	0.935115	1	0.027448	0.202476	0.759038	135	SATB2 HMGB2 ACTR6 SMARCD3 CENPQ CENPN KAT2B KDM4D CENPI HMGB1 CBX3 SMCHD1 CENPS	NO
GO_CHROMATIN_REMODELING_AT_CENTROMERE	0.763077	0.981446	0.0460458	0.27875	0.800204	28	CENPQ CENPN CENPI CENPS CENPP MIS18BP1 ITGB3BP SMARCA5 NPM1 CENPH MIS18A KNL1	NO
GO_CHROMOSOMAL_REGION	0.142364	0.493473	0.249247	-0.234346	-1.1255	294	SPC24 KIF2C PIF1 BIRC5 RECQL4 NEK2 STAG3 PLK1 ZWINT ORC1 BUB1 KMT5C RAD51 XRCC3 INCENP PIWIL2 CENPF MCM2 POLD1 CENPK SLX4 SPOUT1 SKA1 ESCO2 XRCC1 SGO1 SUN2 MAD1L1 DNMT3A SYCP2L ERCC6L CHEK1 NCAPD3 CDCA5 PARP1 MCM4 MCM7 CDCA8 RTEL1 KIF22 DOT1L MEN1 PML RCC2 CENPU RANGAP1 SEH1L SPDL1 NAT10 NUP85 HJURP CBX5 DCTN1 CDT1 SPAG5 CTC1 RNF8 RAD51D CDK1 TP53BP1 CENPV CENPC SMC1A PINX1 MCM3 PRKDC RPA1 NSMCE3…	NO
GO_CHROMOSOME_CENTROMERIC_REGION	0.320225	0.72546	0.186433	-0.230751	-1.03443	172	SPC24 KIF2C BIRC5 NEK2 STAG3 PLK1 ZWINT BUB1 KMT5C INCENP CENPF CENPK SPOUT1 SKA1 ESCO2 SGO1 MAD1L1 DNMT3A SYCP2L ERCC6L NCAPD3 CDCA5 CDCA8 KIF22 RCC2 CENPU RANGAP1 SEH1L SPDL1 NUP85 HJURP CBX5	NO
GO_CHROMOSOME_CONDENSATION	0.285319	0.690466	0.135002	-0.350305	-1.11204	26	TTN NCAPD3 CDCA5 DFFB SMC2 ACIN1 AKAP8L CDK1 NCAPD2 CCNB1 NCAPG MCPH1 AIFM1	NO
GO_CHROMOSOME_LOCALIZATION	0.991667	1	0.0289274	0.175187	0.594761	64	CHMP5 GEM CENPQ UBE2B KIF18A KIF14 CHMP2B KPNB1 CHMP2A CHMP4A NDC80 MIS12 RAB11A	NO
GO_CHROMOSOME_ORGANIZATION_INVOLVED_IN_MEIOTIC_CELL_CYCLE	0.281346	0.685568	0.143759	-0.313432	-1.11318	39	STAG3 CCNE1 TRIP13 BUB1 RAD51 RNF212	NO
GO_CHROMOSOME_SEGREGATION	0.162185	0.527574	0.249247	-0.233993	-1.09492	261	CDC20 KIF2C BIRC5 NEK2 STAG3 PLK1 ZWINT CCNE1 TRIP13 KIFC1 KIF18B BUB1 ANAPC15 XRCC3 CDC6 PTTG1 INCENP CENPF RNF212 SLX4 TTN DDX11 KLHL22 AXIN2 FAM83D SKA1 MKI67 ESCO2 SGO1 MAD1L1 NAA10 NUMA1 ERCC2 CHMP7 NCAPD3 CDCA5 HASPIN KIF4A CDCA8 EME2 KIF22 SMC2 RCC2 UBE2I TOP3B	NO
GO_CHROMOSOME_SEPARATION	0.0229367	0.208492	0.352488	-0.356573	-1.41545	80	CDC20 PLK1 TRIP13 BUB1 ANAPC15 XRCC3 CDC6 PTTG1 CENPF SLX4 KLHL22 MAD1L1 NUMA1 NCAPD3	NO
GO_CHROMOSOME_TELOMERIC_REGION	0.321586	0.726646	0.16318	-0.242633	-1.04704	127	PIF1 RECQL4 ORC1 RAD51 XRCC3 MCM2 POLD1 SLX4 XRCC1 SUN2 CHEK1 PARP1 MCM4 MCM7 RTEL1 DOT1L MEN1 PML NAT10 CBX5 CTC1 RNF8 RAD51D CDK1 TP53BP1 PINX1 MCM3 PRKDC RPA1 NSMCE3 TNKS MCM5 GAR1 DHX36 UPF1 SMG6 BLM WRAP53	NO
GO_CILIARY_BASAL_BODY	0.860759	1	0.0902635	-0.2006	-0.816928	95	SAXO2 CFAP410 KIF7 BBS5 WHRN TBC1D7 CENPF	NO
GO_CILIARY_BASAL_BODY_PLASMA_MEMBRANE_DOCKING	0.125984	0.466188	0.252961	-0.29824	-1.22446	91	NEK2 CC2D2A PLK1 HAUS5 NINL CEP72 PLK4 KIF24 CEP250 CEP131 B9D2 CSNK1E HAUS8 ODF2 TUBG1 FBF1 NPHP4 DCTN1 CEP41 CEP83 CEP89 CDK1 MKS1 CENPJ CDK5RAP2	NO
GO_CILIARY_BASE	0.925926	1	0.062249	-0.216058	-0.658046	22	MOK GLI1	NO
GO_CILIARY_MEMBRANE	0.0798722	0.373355	0.287857	-0.357522	-1.3221	48	TAS2R43 PRCD BBS5 SPTBN5 TSPEAR PKD1 EHD3 SSTR3	NO
GO_CILIARY_PART	0.492424	0.847584	0.173748	-0.208501	-0.9939	269	SAXO2 CC2D2A CFAP410 TAS2R43 KIF7 PRCD BBS5 SPTBN5 GNA11 PMFBP1 TSPEAR MOK PKD1 WHRN GLI1 CATSPERE PTPRK EHD3 TBC1D7 SPA17 AKAP3 CENPF SSTR3 IFT27 CBY1 CCDC120 CCR6 CROCC PRKAR1B GSTM3 INPP5E ULK3 CEP131 PTPN23 ENKUR GUCA1B DLG5 MXRA8 DNAH8 B9D2 TMEM80 PEX6 KIF5A TTC30B ODF2 DNAH1 TUBG1 FBF1 NPHP4 CLUAP1 DCTN1 CEP41 DHRS3 CPLANE2 MAP4 NAPEPLD CEP83 CEP89	NO
GO_CILIARY_PLASM	0.308465	0.715037	0.0873098	0.337795	1.11695	57	RSPH9 NME8 DYNC2LI1 CCDC65 MAK RSPH4A DNAH17 BBS7 ARL13B GAS8 SPAG16 ATG5 MAP1LC3B GABARAP PRKAR1A KIF19 DNAH6 IFT57 DNAH7 CCSAP	NO
GO_CILIARY_TIP	0.971256	1	0.0341205	0.200042	0.608127	37	IFT81 DYNC2LI1 IFT22 TTC26 IFT46 IFT57 IFT74 DYNLL1 IFT52 CDKL5 KIF3C	NO
GO_CILIARY_TRANSITION_ZONE	0.667732	0.940458	0.0888945	-0.240599	-0.889724	48	CC2D2A CFAP410 SPTBN5 WHRN	NO
GO_CILIUM	0.962719	1	0.0170763	0.189068	0.776253	361	DNAH14 RSPH9 MAP1B DNAAF4 IFT81 BBOF1 NME8 DYNC2LI1 CFAP53 CCDC65 ANXA1 CDKL1 CFAP58 FLACC1 PDGFRA SPATA6 MAK DISC1 RSPH4A CFAP36 POC1B FBXL13 ARMC9 EVC DZIP1L DNAH17 BBS7 SCLT1 MERTK SLIRP RP2 TPGS1 CCDC66 ARL13B GAS8 RILP CD52 TMEM67 ADAM15 TMEM107 CATSPER2 EFCAB2 CCDC88A IQCG SLC9B1 SPAG16 IFT22 ATG5 AURKA TTLL7 TBC1D30 ABHD2 RILPL2 CLTB TTC26 MAP1LC3B IQCA1 ADCY10 GABARAP CDHR1 IFT46 CCP110 S…	NO
GO_CILIUM_MOVEMENT	0.0830769	0.376995	0.191892	0.475184	1.3641	28	RSPH9 DNAAF4 DPCD CFAP53 CCDC65 RSPH4A GAS8	NO
GO_CILIUM_ORGANIZATION	0.970353	1	0.0191547	0.18905	0.761918	283	RSPH9 DNAAF4 IFT81 BBOF1 NME8 DYNC2LI1 HAUS1 CFAP53 CCDC65 CDKL1 SPATA6 MAK DISC1 UBE2B RAB23 RSPH4A WWTR1 POC1B SNX10 ARMC9 HAUS4 ATG3 DZIP1L BBS7 SCLT1 TPGS1 CCDC66 ARL13B GAS8 RILP TMEM67 TUBA1A TMEM107 CCDC88A IQCG CEP57 SPAG16 CEP70 SPAG1 IFT22 ATG5 TBC1D30 RILPL2 TTC26 ASAP1 IFT46 CCP110 HAUS6 ARL3 TMEM237 CEP63 KIF19 RAB11A ATP6V1D RPGR IFT57 SSX2IP BBS10 BBS12 PIBF1 HSP90AA1 IFT74 ABCC4 C…	NO
GO_CILIUM_OR_FLAGELLUM_DEPENDENT_CELL_MOTILITY	0.416938	0.798694	0.077884	0.394743	1.04363	20	RSPH9 CCDC65 DNAH17 GAS8 CATSPER1 DNAH6 DNAH7 CCSAP	NO
GO_CIRCADIAN_REGULATION_OF_GENE_EXPRESSION	0.0791542	0.371883	0.287805	-0.368101	-1.35125	46	NR1D1 MTA1 NOCT NPAS2 MYBBP1A PER3 BHLHE41 RAI1 PML CSNK1E EGR1 LGR4 CRY2 KMT2A	NO
GO_CIRCADIAN_RHYTHM	0.0116909	0.139497	0.38073	-0.328836	-1.41348	129	SIK1 LEP KCNA2 NR1D1 GNA11 TNFRSF11A MTA1 NOCT SERPINE1 ID3 NPAS2 CRTC1 NTRK1 TIMELESS MYBBP1A PER3 BHLHE41 RAI1 JUN ADA	NO
GO_CIRCULATORY_SYSTEM_PROCESS	0.049217	0.302817	0.213928	0.310498	1.26253	308	FGF13 UTS2 HBB DOCK4 NTSR1 FOXC1 FFAR3 TRPM4 ATP5PF DSC2 OLR1 SGCD ADRA2A SEMA3A MYOF CACNA2D2 SLC8A1 CLIC2 ADM C3AR1 GNAO1 CES1 KCNJ2 F5 KCND3 TNNT1 MYBPC3 TREX1 CXCL10 TBC1D8 MYL4 NAMPT F2R CACNA2D3 SCN1B STAT1 FKBP1B WWTR1 KCNMA1 EPAS1 MEF2A JAK2 RGS2 SUCNR1 ATP1B3 HRH2 GAS6 SUMO1 SERPINF2 PTPRM SPX DLL1 ICAM1 RNF207 ASPH DOCK5 CXCR2 P2RX1	NO
GO_CIS_GOLGI_NETWORK	0.250836	0.655871	0.160801	-0.302744	-1.13414	52	GOLGA8T HLA-G CCN2 RAB30 B3GAT3 TRAPPC6A	NO
GO_CIS_TRANS_ISOMERASE_ACTIVITY	0.45098	0.824224	0.0699459	0.341182	1.02113	34	FKBP7 FKBP3 FKBP1B PIN4 PPIG FKBP9 PPIF FKBP8 FKBP5 PPWD1 GSTZ1 FKBP11 PPIL3 FKBP2 PPID FKBP1A	NO
GO_CLATHRIN_ADAPTOR_COMPLEX	0.99532	1	0.0344175	0.163626	0.459574	26	AP1S1 PICALM FCHO2 AP2A1 AP2M1 AP2S1 EPS15 AP1G1 AP1G2 AFTPH	NO
GO_CLATHRIN_BINDING	0.680597	0.944427	0.0498907	0.282395	0.863134	38	DNAJC6 CLTCL1 TRPC6 SCLT1 LRRK2 LRP1 PICALM AP2A1 CLTB	NO
GO_CLATHRIN_COAT	0.876093	1	0.0372254	0.235606	0.73535	42	CLTCL1 SCLT1 AP1S1 PICALM SYNJ1 FCHO2 AP2A1 CLTB IGF2R	NO
GO_CLATHRIN_COATED_ENDOCYTIC_VESICLE	0.590625	0.901365	0.0946646	-0.254572	-0.911984	41	HLA-DRB5 HLA-DQB1 HIP1R HLA-DQA1 EPN2 DVL2 MYO1E	NO
GO_CLATHRIN_COATED_ENDOCYTIC_VESICLE_MEMBRANE	0.275148	0.678964	0.142901	-0.331909	-1.10016	30	HLA-DRB5 HLA-DQB1 HIP1R HLA-DQA1 EPN2	NO
GO_CLATHRIN_COATED_PIT	0.365193	0.762632	0.077884	0.323052	1.06647	54	MYO6 SORT1 AP1S2 CLTCL1 AP1S1 LRP1 PICALM SYNJ1 TFRC FCHO2 ITSN1 AP2A1 CLTB	NO
GO_CLATHRIN_COATED_VESICLE	0.194937	0.575561	0.10714	0.305547	1.14497	136	SLC18A1 AP3B2 HLA-DQA2 MYO6 SORT1 FCGR1A FZD5 CD3D CLTCL1 SCARB2 NUMB SNX3 AP1S1 LRP1 EGF VAMP3 PICALM VAMP7 VAMP8 RAB8B RAB5A TFRC FCHO2 KIAA0319 AP2A1 CLTB EDN1 WIPI1 IGF2R	NO
GO_CLATHRIN_COATED_VESICLE_MEMBRANE	0.0385969	0.274821	0.321776	0.409633	1.44688	80	SLC18A1 AP3B2 HLA-DQA2 MYO6 FCGR1A FZD5 CD3D CLTCL1 SCARB2 AP1S1 EGF VAMP3 PICALM VAMP7 VAMP8 RAB5A TFRC FCHO2 KIAA0319 AP2A1 CLTB IGF2R	NO
GO_CLATHRIN_COAT_ASSEMBLY	0.70132	0.952239	0.0531298	0.330134	0.831808	15	CLTCL1 PICALM FCHO2 CLTB	NO
GO_CLATHRIN_COAT_OF_COATED_PIT	0.609635	0.913363	0.0599892	0.346339	0.888782	17	PICALM SYNJ1 FCHO2 AP2A1 CLTB AP2M1 AP2S1 EPS15 CLTC	NO
GO_CLATHRIN_DEPENDENT_ENDOCYTOSIS	0.920732	1	0.0369933	0.223804	0.676343	36	DNAJC6 DLL1 PICALM FCHO2 AP2A1 CLTB SMAP1 AP2M1 SYT11 GPR107 SCYL2 CANX DAB2 AP2S1 PIK3CB WASL CLTC	NO
GO_CLATHRIN_VESICLE_COAT	0.811232	0.996488	0.043888	0.271464	0.762457	26	CLTCL1 AP1S1 PICALM FCHO2 AP2A1 CLTB AP2M1 AP2S1 EPS15 AP1G1 AP1G2 AFTPH CLTC NECAP1	NO
GO_CLEAVAGE_FURROW	0.115265	0.444958	0.234393	-0.343332	-1.26033	46	OR2A4 CEP55 RAB11FIP3 PSD KIF20A PLK4 WDR73 HMCN1 MEN1 PITPNM1	NO
GO_CLEAVAGE_INVOLVED_IN_RRNA_PROCESSING	0.804178	0.995901	0.0684715	-0.264146	-0.798144	21	EXOSC7 NOL9 UTP20 BOP1 EXOSC2	NO
GO_CLUSTER_OF_ACTIN_BASED_CELL_PROJECTIONS	0.793801	0.991719	0.0381629	0.23365	0.831947	90	DOCK4 ITLN1 MYL6 CAPZA2 PEMT AQP1 ADGRV1 CLIC1 CA4 CD36 PLB1 MPP1	NO
GO_COAGULATION	0.160138	0.524077	0.113787	0.288735	1.15175	236	HBB SEMG1 CD177 DGKK ADRA2A DOCK1 PLSCR1 F8 CAPZA2 F5 F12 TLR4 F2R PDGFRA HPSE ENPP4 SERPINA1 P2RX7 ANXA5 MPL JAK2 CLIC1 PLEK CD36 TRPC6 PROS1 FCER1G LYN TFPI MERTK P2RY12 CAPZA1 ADTRP LNPK GAS6 SERPINF2 THBD AXL C1GALT1C1 PLAUR P2RX1 CD59 RAB5A PDGFB ENTPD1 STXBP3 NFE2 KRT1 EDN1 MYL12A MYL9 GATA1 ITPK1 GNA13 DTNBP1 RAB27A IRF2 PRKAR1A RCOR1 PSEN1 STXBP1 SRC PHF21A USF1 CD9 NFE2L2 CDC42 PRKCD	NO
GO_COATED_MEMBRANE	0.769746	0.982835	0.0392759	0.234518	0.839391	92	AP3B2 AP1S2 CLTCL1 AP5B1 SCLT1 AP1S1 PICALM AP3S1 SYNJ1 FCHO2 AP2A1 CLTB IGF2R CHMP2A CHMP4A TMED7 SEC24D	NO
GO_COATED_VESICLE	0.30787	0.714888	0.0758887	0.271045	1.07664	226	SLC18A1 AP3B2 HLA-DQA2 SEC16B B2M F8 MYO6 SORT1 F5 FCGR1A FZD5 CD3D CLTCL1 SERPINA1 SCARB2 ERGIC2 NUMB SNX3 AP1S1 LRP1 EGF VAMP3 CD59 PICALM VAMP7 VAMP8 RAB8B TICAM2 CNIH3 CCDC88A RAB5A TFRC FCHO2 KIAA0319 TMED5 AP2A1 CLTB EDN1 WIPI1 IGF2R TMED7 VTI1B SNX18 YIPF6 IER3IP1 SEC24D RAB27A KDELR1 ADRB2	NO
GO_COATED_VESICLE_MEMBRANE	0.156566	0.517821	0.121543	0.31471	1.18165	140	SLC18A1 AP3B2 HLA-DQA2 SEC16B B2M MYO6 FCGR1A FZD5 CD3D CLTCL1 SCARB2 AP1S1 EGF VAMP3 CD59 PICALM VAMP7 VAMP8 CNIH3 RAB5A TFRC FCHO2 KIAA0319 AP2A1 CLTB IGF2R TMED7 VTI1B SEC24D KDELR1 ADRB2	NO
GO_COBALAMIN_METABOLIC_PROCESS	0.484848	0.842525	0.0937465	-0.348246	-0.965108	15	CLYBL CD320 ABCC1 CUBN ABCD4 MMACHC TCN1	NO
GO_COCHLEA_DEVELOPMENT	0.00497997	0.0804868	0.407018	-0.612456	-1.8506	21	SOBP HOXA1 DCHS1 HES1 MCM2 PTK7 IFT27 DVL2 CCNA2	NO
GO_COENZYME_BINDING	0.328571	0.733686	0.208955	-0.222333	-1.03159	225	GLDC GPT2 NOS3 ATAT1 CHDH COQ6 NUDT6 CARNS1 GNMT HSD17B1 MICAL3 GPHN ACOT7 PNPO PYGM PHGDH GCAT NFS1 FASN SIRT3 SHMT1 KYAT1 FMO4 PARP1 CTH PARP15 ACACB DHCR7 FOXRED2 IVD NDOR1 WWOX PCIF1 PYGB ALDH6A1 TM7SF2 GMDS PHYKPL CTBP1 MMACHC NAA80 QDPR OGFOD3 CRY2 SUOX TYW1B	NO
GO_COENZYME_BIOSYNTHETIC_PROCESS	0.90393	1	0.0894367	-0.189717	-0.81701	126	COQ6 GPHN FDXR HAAO ACOT7 NUDT12 PNPO NFS1 FASN MTHFD1L MLYCD QPRT PPT2 ACSS1 MTHFD1 PARP10 ACACB PDSS2 UBIAD1 ACSF3 METTL16 PARP16 NMNAT3 ACACA QDPR HACD1 SLC25A1 HSD17B12 GCDH PANK4	NO
GO_COENZYME_METABOLIC_PROCESS	1	1	0.110122	-0.16885	-0.777623	207	ACOT1 GAMT COQ6 ALDH1L2 GNMT GPHN FDXR HAAO ACOT7 NUDT12 GGH PNPO CD38 NFS1 FASN MTHFD1L MLYCD SHMT1 QPRT PPT2 ACSS1 MTHFD1 PARP10 ACACB PDSS2 UBIAD1 ACSF3 METTL16 NT5E PARP16 NMNAT3 ACACA QDPR HACD1 MCCC2 SHMT2 SLC25A1 HSD17B12 ACBD6 GCDH PANK4 THEM4 DLST MVD NADSYN1 PDP2 PIPOX PDZD11	NO
GO_COFACTOR_BINDING	0.891803	1	0.021724	0.203187	0.836544	370	HBB P4HA2 P3H3 CYP46A1 THNSL2 DBI TCN2 HBA2 HBA1 FECH RSAD2 CYP4F22 GLRX5 ISCA1 LCN2 MGST1 CISD2 KYNU CBR3 CREG1 SIRT4 FLVCR2 ALAS2 CYBB KDM1B LMO2 JAK2 ME1 ACCSL CYP1B1 SRR CYP26B1 NQO2 TPMT P3H2 BACH1 OAT NFU1 HEBP1 COQ10B CYP51A1 PTGS2 CYB5R4 RNLS PYGL NDUFAB1 PLOD2 GLRX2 PANK1 MT-ND4 ACOXL SPTLC2 MICAL2 BRIP1 EIF2AK1 FLVCR1 TBXAS1 DPYD GFER HSD17B8 ACADM EGLN1 ACBD5 ISCA2 CYBA CYB5D2 HPGD DNA…	NO
GO_COFACTOR_BIOSYNTHETIC_PROCESS	0.965937	1	0.0232958	0.191075	0.737533	177	FECH PDK4 SPTA1 ACSL1 KYNU NAMPT ALAS2 SNCA CHAC2 CYBB ME1 HAGH GGCT COQ10B COASY COQ3 PTGS2 ACSL4 NADK MPC1 RNLS PANK1 MPC2 MTHFS HSD17B8 PPCDC ELOVL5 PPCS CYBA ACSL3 DLD BDH2 MAT2B PANK2 NFE2L2 GSTZ1 COQ2 PPT1 SLC25A39 MGST2 COQ5 SLC7A11 COX15 PDHX PDP1 GCLC TMEM14C ELOVL6	NO
GO_COFACTOR_CATABOLIC_PROCESS	0.0902367	0.393659	0.179782	0.436819	1.34866	40	HBB HBA2 HBA1 HP BLVRA CBR3 SNCA PRDX5 CHAC2 PRDX6 BLVRB	NO
GO_COFACTOR_METABOLIC_PROCESS	0.922652	1	0.0203426	0.198595	0.811804	338	HBB DBI TCN2 HBA2 HBA1 FECH AKR1C1 PDK4 HP SPTA1 PEMT ACSL1 AKR1C3 MGST1 BLVRA KYNU NAMPT CBR3 VNN2 ALAS2 SNCA PRDX5 CHAC2 FOLR2 CYBB ME1 FAR2 HAGH GGCT PRDX6 BLVRB MTHFD2 BST1 COQ10B COASY COQ3 PTGS2 ACSL4 NADK MPC1 RNLS DGAT2 OXSM GLRX2 PANK1 APIP MPC2 EIF2AK1 MTHFS HSD17B8 AMD1 PPCDC ELOVL5 PPCS FAR1 CYBA ACSL3 PXDNL DLD BDH2 VNN1 KYAT3 SUCLG1 MAT2B PANK2 NFE2L2 ACOT13 GSTZ1 ACOT4 COQ2 HMGCS1 …	NO
GO_COFACTOR_TRANSMEMBRANE_TRANSPORTER_ACTIVITY	0.888889	1	0.0619763	-0.25501	-0.70672	15	CD320 ABCC1 SLC25A42	NO
GO_COFACTOR_TRANSPORT	0.120482	0.454193	0.155242	0.43614	1.29987	33	FOLR3 TCN2 LCN2 FLVCR2 P2RX7 FOLR2	NO
GO_COGNITION	0.327649	0.732962	0.0753094	0.278378	1.07029	170	FGF13 NTSR1 S100B NLGN4Y NRXN3 SORCS3 NRXN1 KCNK10 CRHBP PLK2 AFF2 RIN1 CBR3 C5AR1 GPR155 TLR2 CX3CR1 GM2A NQO2 CEBPB HRH2 ST3GAL4 CPEB3 CYFIP1 PICALM TNF PAIP2 NTAN1 PTGS2 SYNJ1 PTEN CHMP2B NCSTN CDK5 MAP1A LILRB2 FOS CASP3	NO
GO_COLLAGEN_BINDING	0.253666	0.659701	0.0999277	0.370708	1.15213	41	SPOCK1 ACHE ADGRG6 PODN ITGA10 CTSS CTSL CTSB ITGA9 ADAM9 PDGFB TGFBI DDR2 ITGA1	NO
GO_COLLAGEN_BIOSYNTHETIC_PROCESS	0.746154	0.972512	0.04707	0.281701	0.808674	28	P3H3 ERRFI1 F2R ARG1 SERPINF2	NO
GO_COLLAGEN_CATABOLIC_PROCESS	0.371795	0.766324	0.0831291	0.401255	1.08194	22	MMP14 MMP8 COL13A1 CTSS CTSL ADAM15 CTSB	NO
GO_COLLAGEN_CONTAINING_EXTRACELLULAR_MATRIX	0.0380499	0.273621	0.252961	0.33659	1.3194	195	S100A8 COL10A1 COL17A1 SLPI MMP8 EFNA5 ORM2 C1QB COL13A1 S100A9 COL11A2 ACHE BCAM ORM1 PLSCR1 NTN4 LGALS3 LGALS3BP MXRA7 C1QA ANXA1 VCAN LGALS4 F12 ADAMTSL4 SERPINB1 VIT PODN DEFA1 SERPINA1 CLC ANXA5 S100A6 FGL2 FBN2 LGALS9	NO
GO_COLLAGEN_FIBRIL_ORGANIZATION	0.715385	0.960096	0.0489954	0.288704	0.828778	28	FOXC1 COL11A2 CYP1B1 LOXL3 SERPINF2 PLOD2 DDR2 TGFBR1	NO
GO_COLLAGEN_TRIMER	0.0256248	0.220302	0.352488	0.518022	1.5504	34	COL10A1 COL17A1 MSR1 C1QB COL13A1 COL11A2 COLEC12 C1QA EDA FCN1 EMILIN2	NO
GO_COLLATERAL_SPROUTING	0.00355759	0.0648218	0.431708	0.696754	1.80893	18	FGF13 LPAR3 EFNA5 FSTL4 LRP1 ZEB2 IFRD1 SPP1	NO
GO_COLUMNAR_CUBOIDAL_EPITHELIAL_CELL_DEVELOPMENT	0.698795	0.95151	0.049094	0.282492	0.841941	33	BAD RHEB DLL1 PRDM1 KLF5 YIPF6 HIF1A CDKN1A C1GALT1 RARA SOD1 TIGAR SEC24B	NO
GO_COLUMNAR_CUBOIDAL_EPITHELIAL_CELL_DIFFERENTIATION	0.491749	0.846977	0.10925	-0.252878	-0.976102	58	WNT11 SCRIB SERPINE1 WHRN TP63 HES1	NO
GO_COMPLEMENT_ACTIVATION	0.00982376	0.125263	0.38073	0.556557	1.66573	34	C3 C1QB C4A C3AR1 C1QA CFH C5AR1 C1R PROS1 CR1 C5 FCN1 CD59 CD55 KRT1 CFD CD46	NO
GO_CONDENSED_CHROMOSOME	0.0129217	0.14765	0.38073	-0.300755	-1.36161	180	SPC24 KIF2C BIRC5 NEK2 STAG3 PLK1 ZWINT BUB1 KMT5C RAD51 HUS1B INCENP CENPF RNF212 CENPK TTN SPOUT1 DDX11 SKA1 MKI67 SGO1 SUN2 MAD1L1 L3MBTL1 SYCP2L ERCC6L CHEK1 NCAPD3 CDCA5 SMC2 UBE2I TOP3B CENPU RANGAP1 RGS12 SEH1L SPDL1 NUP85 HJURP RAD9A HSPA2	NO
GO_CONDENSED_CHROMOSOME_CENTROMERIC_REGION	0.0190904	0.189035	0.352488	-0.331066	-1.3658	103	SPC24 KIF2C BIRC5 NEK2 PLK1 ZWINT BUB1 KMT5C INCENP CENPF CENPK SPOUT1 SKA1 SGO1 MAD1L1 SYCP2L ERCC6L NCAPD3 CENPU RANGAP1 SEH1L SPDL1 NUP85 HJURP	NO
GO_CONDENSED_NUCLEAR_CHROMOSOME	0.0213257	0.198761	0.352488	-0.375031	-1.47419	70	NEK2 STAG3 PLK1 BUB1 KMT5C RAD51 HUS1B INCENP RNF212 TTN SUN2 SYCP2L CHEK1 NCAPD3 UBE2I RGS12 RAD9A HSPA2 NOL6 TUBG1	NO
GO_CONDENSED_NUCLEAR_CHROMOSOME_CENTROMERIC_REGION	0.224227	0.617628	0.148262	-0.396446	-1.17683	20	PLK1 BUB1 KMT5C SYCP2L	NO
GO_CONNECTIVE_TISSUE_DEVELOPMENT	0.202073	0.58489	0.227987	-0.253288	-1.12524	152	WNT11 BMP8B SOX5 FGF2 LEP COL7A1 CCN2 PKD1 WNT5B LOXL2 BMP3 COL6A3 CSF1 CCN3 AXIN2 WNT7A LRP6 SERPINH1 WNT10B PPARD FTO SELENOM PAXIP1 SOX8 THRA DYRK1B GPLD1 BMP1 SMPD3 EGR1 ARID5B HYAL2	NO
GO_CONTRACTILE_ACTIN_FILAMENT_BUNDLE_ASSEMBLY	0.227612	0.622211	0.179782	-0.284824	-1.13413	78	WNT11 RAPGEF3 SORBS3 CCN2 ARHGEF5 PHACTR1 ASAP3 PPP1R9A MET EVL ABL1 CARMIL1	NO
GO_CONTRACTILE_FIBER	0.363057	0.762129	0.0723571	0.280525	1.05055	133	NEBL PGM5 XIRP2 MYH15 SLC8A1 PSMA6 SLC4A1 TNNT1 MYBPC3 MYL4 LRRC39 TWF1 ANKRD23 FKBP1B KAT2B DEK PALLD SDC4 NEXN CMYA5 ITGB1BP2 MYL6B FBXO22 SMN2 TMOD1	NO
GO_COP9_SIGNALOSOME	0.626888	0.920255	0.0542316	0.29654	0.893714	35	COPS9 COPS2 BASP1 COPS5 COPS4 FLOT1 HSPA6 COPS3 TMOD1 AMOTL1 COPS8 HSPA1L	NO
GO_COPII_COATED_ER_TO_GOLGI_TRANSPORT_VESICLE	0.744624	0.972105	0.0409884	0.239226	0.844978	80	HLA-DQA2 SEC16B B2M F8 F5 SERPINA1 ERGIC2 CD59 TICAM2 CNIH3 TMED5 TMED7 VTI1B YIPF6 IER3IP1 SEC24D HLA-F CTSZ CTSC	NO
GO_COPII_COATED_VESICLE_BUDDING	0.402473	0.787672	0.0709609	0.301783	1.0337	66	SEC16B F8 F5 SERPINA1 CD59 GORASP1 CNIH3 NAPA SEC24D INSIG1 CTSZ TRAPPC6B CTSC SCFD1 VAPA RAB1A PDCD6 TMED2 SEC23IP SEC24B PPP6C TGFA MIA3 USO1 CNIH1 BET1 TRAPPC5	NO
GO_COPII_VESICLE_COAT	0.607261	0.91247	0.0598603	0.355503	0.895729	15	TMED7 SEC24D PDCD6 SEC24B KLHL12 SEC24A SAR1B SEC23A SAR1A	NO
GO_COPI_COATED_VESICLE	0.333333	0.738004	0.0873098	0.394667	1.10298	25	AP3B2 CCDC88A TMED7 KDELR1 DIPK2A TMED2 ARFGAP3	NO
GO_COPI_COATED_VESICLE_MEMBRANE	0.865353	1	0.0432769	0.273469	0.709987	18	TMED7 KDELR1 DIPK2A TMED2 ARFGAP3 COPB1 COPE ARCN1 COPA	NO
GO_COPI_VESICLE_COAT	0.953795	1	0.0390355	0.22259	0.560841	15	TMED7 DIPK2A ARFGAP3 COPB1 COPE ARCN1 COPA	NO
GO_COPPER_ION_BINDING	0.40367	0.787672	0.11725	-0.290732	-1.03256	39	S100A13 AOC1 MOXD1 LOXL2 AOC3 ANG	NO
GO_COPPER_ION_HOMEOSTASIS	0.886139	1	0.042417	0.268381	0.676216	15	SLC31A2 ATP7A SLC31A1 CUTC PRNP ARF1 XIAP	NO
GO_CORECEPTOR_ACTIVITY	0.612368	0.914396	0.0552496	0.299461	0.896264	34	LY96 NRP1 LILRA4 LRP1 TGFBR3 ITGAV ACVR2A CCR5 CXCR6	NO
GO_CORE_PROMOTER_BINDING	0.540123	0.872698	0.0992333	-0.26075	-0.951496	45	POU2AF1 PRDM11 ZNF462 TAF1C ZFP64 SMARCB1 ZNF827 SOX8 UBTF ZNF335 TBP SMARCA4 PIH1D1 ZNF507 RUVBL2 TP53	NO
GO_CORE_PROMOTER_SEQUENCE_SPECIFIC_DNA_BINDING	0.486804	0.843235	0.102449	-0.279652	-0.978893	37	POU2AF1 ZNF462 TAF1C ZFP64 SMARCB1 ZNF827 SOX8 UBTF ZNF335 TBP SMARCA4 PIH1D1 ZNF507 RUVBL2 TP53	NO
GO_CORNIFICATION	0.554217	0.880348	0.0598603	0.321169	0.940326	31	KRT5 DSC2 PI3 CSTA	NO
GO_CORNIFIED_ENVELOPE	0.461794	0.831127	0.0736213	0.387167	0.993554	17	DSC2 PI3 CSTA ANXA1	NO
GO_CORONARY_VASCULATURE_DEVELOPMENT	0.763827	0.981463	0.0446854	0.267325	0.791792	32	SGCD NRP1 PRDM1 TGFBR3	NO
GO_CORTICAL_ACTIN_CYTOSKELETON	0.661041	0.937556	0.048506	0.263749	0.887367	61	RTKN GMFG DLC1 SPTA1 CAPZA2 SPTB CDH1 CAPZA1 ANLN	NO
GO_CORTICAL_CYTOSKELETON	0.540323	0.872725	0.0557104	0.270618	0.95586	80	RTKN GMFG DLC1 SPTA1 CAPZA2 SLC4A1 SPTB CDH1 CAPZA1 ANLN MPP1 GYPC EPB42 FLOT1 EEF1A1 TMOD1 EPB41 MTSS2 PLS1 GMFB	NO
GO_CORTICAL_CYTOSKELETON_ORGANIZATION	0.137313	0.484882	0.143759	0.416799	1.27393	38	RTKN EPB41L3 PLEK ANLN RHOQ TNF CDK5 EPB41 PLS1	NO
GO_COTRANSLATIONAL_PROTEIN_TARGETING_TO_MEMBRANE	1.90358e-12	1.01586e-09	0.898671	0.65639	2.38038	100	RPL34 RPS24 RPL17 RPL23 RPL26 RPL7 RPL36A RPL39 RPS3A RPS7 RPS17 RPL9 RPL21 RPL11 RPS25 RPL41 RPL27 RPL31 RPL35A RPS27A RPL30 RPS20 RPL35 SRP14 SRP9 RPS18 RPL24 RPS29 RPS6 RPL5 SRP19 RPS11 ARL6IP1 RPS10 ZFAND2B RPS4Y1 RPL27A RPS12 RPS8 SEC62 RPL15 RPL4 RPL22 SSR2	NO
GO_COVALENT_CHROMATIN_MODIFICATION	1	1	0.013628	0.138615	0.570774	388	PRDM5 HAT1 IL1B NAP1L2 DPY30 PPARGC1A VRK1 YEATS4 IGF2 NEK11 UBE2B BRCA2 SAP30 SNCA KAT2B GTF2B KDM1B JAK2 KDM4D DNMT3B TAF7 TET2 USP15 LRRK2 USP16 SETD3 PADI2 SPI1 RESF1 EID1 BCL6 CDK5 ATG5 AURKA TAF9 BAZ1A MIER1 MRGBP FMR1 MSL3 CUL4B WBP2 ENY2 MYB PCGF1 RLF PCGF6 PCGF5 UBE2E1 RCOR1 ARID4B MSL1 ARID4A CHD1 UTY BRCC3 EZH2 KDM7A SETD7 SUDS3 POLE4 PADI4 BRCA1 PRKCD CARM1 WAC SKP1 TRIP12 UBE2A NCOA1…	NO
GO_CRANIAL_NERVE_DEVELOPMENT	0.129808	0.471128	0.154191	0.486017	1.31049	22	LPAR1 NRP1 SEMA3A MAFB TMEM126A SLC1A3 RPL24 EPHB1	NO
GO_CRANIAL_SKELETAL_SYSTEM_DEVELOPMENT	0.619632	0.916086	0.0908241	-0.251185	-0.896311	40	PAX5 CEP55 HOXA1 TP63 MTHFD1L MTHFD1 AUTS2	NO
GO_CRISTAE_FORMATION	0.0501374	0.304057	0.321776	0.498937	1.47781	32	ATP5PF ATP5MG ATP5F1C ATP5ME MT-ATP6 MICOS13 ATP5F1E ATP5PO ATP5PB MT-ATP8 ATP5F1D OMA1 UQCC3 ATP5PD APOO PINK1 ATP5MF	NO
GO_CUL3_RING_UBIQUITIN_LIGASE_COMPLEX	1	1	0.0326513	0.157186	0.473727	35	RBX1 RNF7 KLHL2 SPOPL PDCD6 KLHL9 KBTBD8 GLMN KLHL8 KLHL7 KLHL24 KLHL15 KLHL12	NO
GO_CUL4_RING_E3_UBIQUITIN_LIGASE_COMPLEX	0.317771	0.723782	0.0883594	0.381458	1.11684	31	RBX1 DCAF12 RNF7 CUL4B COP1 DCAF13 DCAF6 CRBN	NO
GO_CULLIN_FAMILY_PROTEIN_BINDING	0.581281	0.897499	0.0617054	0.351836	0.913448	18	RBX1 DCUN1D1 DCUN1D5 RNF7 SKP1 KCTD6 DCUN1D3 DCUN1D4	NO
GO_CULLIN_RING_UBIQUITIN_LIGASE_COMPLEX	1	1	0.0231538	0.15639	0.588288	144	RBX1 FBXO6 FBXO7 DCAF12 FBXO39 CKS2 FBXO2 FBXL13 FBXO4 FBXL5 RNF7 FBXW7 KLHL2 CDC27 SPOPL ELOB FBXO45 FBXO9 CUL4B ZSWIM6 COP1 DCAF13 DCAF6 ZER1 TRIM21 ANAPC4 FBXL15 CRBN CDC26 FBXL3 SKP1 CUL5 PDCD6 KLHL9 CKS1B AMN1 KBTBD8	NO
GO_CYCLIC_NUCLEOTIDE_BINDING	0.359173	0.759663	0.113787	-0.362684	-1.05761	19	RAPGEF3 HCN3 PRKAR1B PRKG1 POPDC2	NO
GO_CYCLIC_NUCLEOTIDE_MEDIATED_SIGNALING	0.46912	0.834866	0.0613026	0.275301	0.997006	97	LPAR1 ADRA2A ADM RUNDC3A AQP1 CXCL10 ADGRG6 UBE2B RGS2 GPR65 CD36 ABCA1 CALCRL NUDT4 NDUFS4 ADGRE2 CDC34 GNAL CALM2 PDE2A ADGRE3 ADGRG3 GNA13 PRKAR1A ARRDC3 ADRB2 ADGRD1 OPRL1 CALCB ADGRB3	NO
GO_CYCLIC_NUCLEOTIDE_PHOSPHODIESTERASE_ACTIVITY	0.963918	1	0.0590955	-0.206881	-0.614118	20	PDE7B PDE1B PRKAR1B PDE3A CNP PDE7A	NO
GO_CYCLIN_BINDING	0.98892	1	0.0613026	-0.180956	-0.574443	26	UBE3D FBXO31 PROCA1 CDK6 CDK1	NO
GO_CYCLIN_DEPENDENT_PROTEIN_KINASE_ACTIVITY	0.613293	0.91446	0.0552496	0.3067	0.887995	29	CDKL3 CDKL1 CDK15 CDK7 CCNK CDK5 CDK17 CDK8 CDK4 CDK11A	NO
GO_CYCLIN_DEPENDENT_PROTEIN_KINASE_HOLOENZYME_COMPLEX	0.678899	0.944427	0.0855357	-0.246771	-0.876432	39	CCNB2 CCNE1 CCNF CCND1 CCNI2	NO
GO_CYCLIN_DEPENDENT_PROTEIN_SERINE_THREONINE_KINASE_REGULATOR_ACTIVITY	0.599711	0.907459	0.0542316	0.287987	0.908743	43	CCNB3 CCNE2 CCNA1 CKS2 KAT2B HEXIM2 CDKN2D CCNK CCNC CASP3 CDKN1C CDKN2B CDKN1A MNAT1 CDK4 CCNL1 CCNT2 CKS1B CDKN2C CDKN2A CCNI CCNG1 CCNG2 CCNT1	NO
GO_CYCLOSPORIN_A_BINDING	0.595588	0.906038	0.0806388	-0.317841	-0.895001	16	PPIAL4F PPIAL4E	NO
GO_CYSTEINE_TYPE_ENDOPEPTIDASE_ACTIVATOR_ACTIVITY_INVOLVED_IN_APOPTOTIC_PROCESS	0.734848	0.969296	0.0713053	-0.297774	-0.825234	15	NKX3-1	NO
GO_CYSTEINE_TYPE_ENDOPEPTIDASE_ACTIVITY	0.442935	0.819078	0.0656814	0.287408	1.01353	79	CASP5 CARD16 USP12 CASP1 CLC USP15 USP16 CTSS CASP4 CTSL CTSB CTSH SENP6 CTSO CASP6 CASP3 CFLAR CASP8 USP1 PYCARD CTSW USP25 CTSZ CTSC ESPL1	NO
GO_CYSTEINE_TYPE_ENDOPEPTIDASE_INHIBITOR_ACTIVITY	0.0453172	0.292612	0.261664	0.496432	1.43733	29	SPOCK1 CARD16 CSTA CST7 SNCA PRDX5 NAIP BIRC2 LTF GAS6 CSTB TNFSF14 CST3 CAST	NO
GO_CYSTEINE_TYPE_ENDOPEPTIDASE_INHIBITOR_ACTIVITY_INVOLVED_IN_APOPTOTIC_PROCESS	0.255814	0.660956	0.10714	0.464563	1.19217	17	SNCA PRDX5 NAIP BIRC2 GAS6 TNFSF14 PRDX3	NO
GO_CYSTEINE_TYPE_ENDOPEPTIDASE_REGULATOR_ACTIVITY_INVOLVED_IN_APOPTOTIC_PROCESS	0.42003	0.800481	0.0730744	0.3537	1.04763	32	CASP1 BAD SNCA PRDX5 NAIP BIRC2 GAS6 CTSH TNFSF14 PYCARD CARD8 CASP8AP2 PRDX3	NO
GO_CYSTEINE_TYPE_PEPTIDASE_ACTIVITY	0.346784	0.751209	0.0741759	0.281666	1.05861	142	CASP5 CARD16 YOD1 USP12 CASP1 CLC MINDY4 COPS5 TANK COPS4 ZUP1 USP15 USP16 CTSS CASP4 CTSL CTSB CTSH ZRANB1 SENP6 CTSO CASP6 CASP3 CFLAR TNFAIP3 CASP8 USP1 PYCARD USP39 MINDY2 CTSW USP32 USP25 VCPIP1 CTSZ UCHL3 CTSC BRCC3 ESPL1 USP31 JOSD2 SENP7 MINDY3 USP33 USP30 USP54	NO
GO_CYTOCHROME_COMPLEX	0.0292006	0.240563	0.352488	0.557888	1.53183	24	UQCRB NDUFA4 UQCRH UQCRHL UQCRQ COX7B COX6A1 UQCRC2 UQCC3 UQCR10	NO
GO_CYTOCHROME_COMPLEX_ASSEMBLY	0.426205	0.8035	0.0727141	0.349537	1.04176	33	UQCRB SMIM20 PET100 COA5 CYBA COA6 UQCC3 COA4 UQCR10 COX16 COX15 COX14 TTC19 MT-CO3 HCCS SURF1 COA3	NO
GO_CYTOKINESIS	0.908163	1	0.0290688	0.209653	0.783496	130	RTKN CHMP5 NUSAP1 PLK2 BRCA2 KIF20B SPIRE1 MITD1 ANLN KIF14 SPIRE2 SH3GLB1 CHMP2B AURKA MAP9 PKN2 CALM2 SPAST CCP110 CHMP2A CHMP4A SNX18 KIF13A ARL3 E2F8 RAB11A ESPL1 PRPF40A APC CDC42 CSPP1 RHOC ACTR2 JTB	NO
GO_CYTOKINETIC_PROCESS	0.129573	0.471128	0.15017	0.426512	1.28893	36	RTKN CHMP5 KIF20B SPIRE1 MITD1 ANLN SPIRE2 CHMP2B SPAST CHMP2A CHMP4A SNX18	NO
GO_CYTOKINE_ACTIVITY	0.00248907	0.0504512	0.431708	0.478559	1.69943	84	CCL8 INHBB NRG1 IL1RN CCL3L1 THNSL2 IL1B SECTM1 IL15 OSM CXCL10 NAMPT PPBP CKLF CMTM2 TNFSF15 HMGB1 CXCL16 C5 CXCL1 TNFSF13 TNF TNFSF10 IL18 GRN IFNG FAM3B EDN1 CXCL5 SPP1 CCL4 TNFSF14 TNFSF13B TNFSF11 CCL5 VSTM1 GDF9	NO
GO_CYTOKINE_BINDING	0.203457	0.587218	0.107554	0.324306	1.16489	94	IL1RN IL31RA IL20RB NRP1 ACKR1 LEPR PRLR CCR1 IL1R1 IL1R2 CD36 CCRL2 COPS5 CX3CR1 IFNGR1 HMGB1 IL23R CXCR1 IL13RA1 CXCR2 TGFBR3 IL18R1 ELANE CSF3R TWSG1 CSF2RA CCR2 ZFP36 TNFRSF1A ITGAV TNFRSF1B CCR5 TGFBR1 CXCR6	NO
GO_CYTOKINE_METABOLIC_PROCESS	0.0335121	0.260185	0.287857	0.401192	1.42896	88	INHBB IL1B LAG3 ERRFI1 TLR8 LILRB1 NMI TLR4 TLR3 TBK1 IGF2BP2 CYBB BCL3 TNFSF15 CX3CR1 TLR7 CEBPB TLR6 CARD9 IGF2BP3 IL1RAP TLR1 TYROBP KLF4 TNF IL18 ELANE CCR2	NO
GO_CYTOKINE_PRODUCTION_INVOLVED_IN_IMMUNE_RESPONSE	0.0001052	0.00466434	0.538434	0.532036	1.88432	82	FFAR3 TRPM4 IL31RA IL1B RSAD2 B2M IL18RAP FFAR2 LILRB1 IRAK3 FZD5 TLR4 ARG1 TLR3 CLC IL1R1 TLR2 CD36 FCER1G BST2 SLC11A1 GAS6 TNF CD160 NOD2 IL18R1 CD55 MAPK14 IL18 BCL6 ATG5 CCR2	NO
GO_CYTOKINE_PRODUCTION_INVOLVED_IN_INFLAMMATORY_RESPONSE	0.611446	0.914174	0.0552496	0.307955	0.901639	31	TLR4 MEFV IL1R2 MYD88 TLR6 NOD2 MAPK14 IL17RA SIRPA PYCARD	NO
GO_CYTOKINE_RECEPTOR_ACTIVITY	0.0807114	0.373359	0.183024	0.383274	1.32495	69	IL31RA IL20RB IL18RAP LEPR PRLR CCR1 IL1R1 CMKLR1 IL1R2 MPL CCRL2 CX3CR1 IFNGR1 IL23R CXCR1 IL1RAP CSF2RB IL13RA1 CXCR2 IL18R1 CSF3R CSF2RA IFNGR2 CCR2 IL15RA IL17RA CCR5 CXCR6	NO
GO_CYTOKINE_RECEPTOR_BINDING	0.00961904	0.123914	0.38073	0.39704	1.49665	146	CCL8 INHBB EFNA5 IL1RN CCL3L1 IL1B TLR5 IL15 CADM4 OSM CXCL10 PPBP CKLF STAT1 EDA JAK2 TNFSF15 LRG1 CCRL2 MYD88 IL23R CXCL16 CD300LF C5 USP15 CXCL1 TNFSF13 TGFBR3 TNF TNFSF10 IL18 TRIP6 SPRED2 IFNG CCR2 CASP3 BID CXCL5 CFLAR CASP8 ACVR2A CCL4 TNFSF14 TNFSF13B PYCARD TNFSF11 TGFBR1 CCL5 GDF9 RIPK1 PIBF1 CASP8AP2 IRAK4	NO
GO_CYTOKINE_SECRETION	3.57652e-05	0.00191616	0.557332	0.463451	1.76491	158	S100A12 MMP8 ORM2 ARG2 LPL CARD16 IL1B ORM1 TLR5 AIF1 CLEC9A ANXA1 SELENOK FFAR2 TLR8 OSM LILRB1 FZD5 LILRA5 TLR4 CASP1 F2R SRGN DYSF P2RX7 IL1R2 LGALS9 TLR2 CD36 TNFRSF21 CD14 ABCA1 LYN CLEC5A NLRC4 FGR CLECL1 HMGB1 GAS6 TLR6 C5 FCN1 IL1RAP LRRK2 LRP1 CLEC4E TLR1 CLEC6A TNF CD160 NOD2 MAPK14 HAVCR2 ATG5 RIPK2 PTPN22 CD58 SOCS1 TNFAIP3 RBPJ CD244 IL17RA ITGAV TNFRSF1B PYCARD CARD8 MCOLN2	NO
GO_CYTOLYSIS	0.0038302	0.0669251	0.431708	0.668976	1.76865	20	GZMA GZMH LILRB1 ROMO1 LYZ P2RX7 PGLYRP1 GZMB C5	NO
GO_CYTOPLASMIC_DYNEIN_COMPLEX	0.0709571	0.354754	0.216543	0.568393	1.43213	15	DYNC2LI1 DYNLT3 DYNC1LI1 DYNLT1 TOPORS SNX4 DYNLL1	NO
GO_CYTOPLASMIC_MICROTUBULE	0.136667	0.483866	0.222056	-0.330543	-1.23824	53	SAXO2 KIF2C SNPH KIF18B MTUS2 GTSE1 GRAMD2B MAPRE3 NUMA1 TMEM214 FAM161B BICD1 TUBG2 TUBG1 MAPRE2	NO
GO_CYTOPLASMIC_MICROTUBULE_ORGANIZATION	0.571885	0.89101	0.0978773	-0.252734	-0.928993	47	TUBGCP6 NUMA1 WDR73 KATNAL1 HOOK2 CCDC88C STMN3 TUBG2 TUBG1 KATNAL2 CAMSAP2 DVL1 CCDC13 TUBGCP2 CCDC88B IFT172	NO
GO_CYTOPLASMIC_MRNA_PROCESSING_BODY_ASSEMBLY	0.791237	0.991719	0.0686326	-0.270961	-0.804337	20	NOCT EDC3 ATXN2L	NO
GO_CYTOPLASMIC_PATTERN_RECOGNITION_RECEPTOR_SIGNALING_PATHWAY	0.200286	0.582891	0.113313	0.358959	1.19105	58	RIOK3 RPS27A ALPK1 TLR4 TSPAN6 BIRC2 DDX60 TIFA NOD2 RIPK2 PTPN22 TNFAIP3 CASP8 NFKBIA MAP2K6	YES
GO_CYTOPLASMIC_PATTERN_RECOGNITION_RECEPTOR_SIGNALING_PATHWAY_IN_RESPONSE_TO_VIRUS	0.365971	0.763265	0.0840746	0.395066	1.08476	24	RIOK3 TSPAN6 BIRC2 DDX60	NO
GO_CYTOPLASMIC_REGION	0.293275	0.698437	0.0758887	0.262926	1.0754	339	AP3B2 RTKN RSPH9 INSC MYO10 NEFL PARD3B NME8 GMFG DLC1 DYNC2LI1 SPTA1 CAPZA2 CCDC65 MYO6 MARCKS BLOC1S2 SLC4A1 SPTB MAK ARV1 RSPH4A SNCA MYL12B SPIRE1 RHOU TRIP10 DNAH17 BBS7 CDH1 CAPZA1 ANLN ARL13B WASF1 GAS8 LRRK2 ASPH RHOQ MPP1 WASHC1 GYPC CD302 EPB42 FLOT1 SPIRE2 EXOC6 AP3S1 EEF1A1 BLOC1S6 SPAG16 TMOD1 AGTRAP ATG5 MAP1A BLOC1S1 EPB41 FMR1 RHOG CLTB MAP1LC3B GABARAP SPAST KIF1B MTSS2 PLS1 GMFB…	NO
GO_CYTOPLASMIC_SEQUESTERING_OF_PROTEIN	0.989691	1	0.057853	-0.163281	-0.484691	20	PKD1 TONSL DBN1	NO
GO_CYTOPLASMIC_SEQUESTERING_OF_TRANSCRIPTION_FACTOR	0.942244	1	0.0395979	0.234283	0.590302	15	MXI1 NFKBIA NFKBIE PKD2 PSMD10 NFKBIL1	YES
GO_CYTOPLASMIC_SIDE_OF_MEMBRANE	0.0131119	0.148982	0.38073	0.38477	1.44611	142	PGM5 NTSR1 GEM STYK1 GNG10 RPL27 DTNA SPTA1 GNG11 ERRFI1 GNAO1 SPTB PTP4A1 S100A6 RGS2 AKAP5 DNAJA1 RPS29 BIRC2 LYN FGR GM2A CDH1 HCK STAC3 LRRK2 NPTXR GNG5 PTK6 DIABLO LITAF AJAP1 RAB5A GNAL EEF1A1 PTEN GNGT2 GNAI3 EPB41 IQGAP1	NO
GO_CYTOPLASMIC_STRESS_GRANULE	0.987138	1	0.0686326	-0.167427	-0.632324	51	CTSG ATXN2L RPTOR MOV10 ELAVL1 PABPC3 KHSRP PABPC1L	NO
GO_CYTOPLASMIC_TRANSLATION	1.46252e-08	2.19107e-06	0.74774	0.61416	2.18978	87	RPL17 RPL26 TMA7 RPL36A RPL39 RPL26L1 RPL9 RPL11 RPL41 RPL31 RPL35A YBX3 RWDD1 RPL30 MCTS1 RPL24 ZC3H15 RPS29 EIF4EBP1 CPEB4 CPEB3 EIF3E HSPA14 GSPT1 EIF2S3B	NO
GO_CYTOPLASMIC_TRANSLATIONAL_INITIATION	0.35994	0.760291	0.0815265	0.374809	1.08989	30	MCTS1 EIF4EBP1 EIF3E EIF2S3B DENR RPL13A EIF5 NCK1 EIF3M EIF3K EIF3L EIF3H EIF4B EIF3C EIF3J EIF4H EIF3G EIF2S3	NO
GO_CYTOSKELETON_DEPENDENT_CYTOKINESIS	0.540802	0.872923	0.057006	0.274622	0.957375	74	RTKN CHMP5 NUSAP1 BRCA2 KIF20B SPIRE1 MITD1 ANLN SPIRE2 CHMP2B MAP9 SPAST CHMP2A CHMP4A SNX18 ARL3 ESPL1 APC RHOC ACTR2 JTB VPS4B RHOA CHMP1B CKAP2 CHMP3 ACTR3 CFL1 BBS4 TTC19	NO
GO_CYTOSKELETON_DEPENDENT_INTRACELLULAR_TRANSPORT	0.422744	0.803151	0.0633597	0.268942	1.02306	154	AP3B2 MYO10 MAP1B NEFL IFT81 DYNC2LI1 BLOC1S2 MAK MAP6D1 WASF1 TRIM58 TUBA1A RAB6A VAMP7 AP3S1 CCDC88A BLOC1S6 IFT22 MAP1A BLOC1S1 FMR1 TTC26 RHOT1 SPAST IFT46 KIF1B KIF13A ARL8B ARL3 DTNBP1 FLOT2 HIF1A RPGR IFT57 SSX2IP BBS12 TRAK2 CDC42 IFT74	NO
GO_CYTOSOLIC_CALCIUM_ION_TRANSPORT	0.707113	0.955494	0.101351	-0.216228	-0.898895	106	CACNB3 FGF2 CCN2 F2RL3 CD19 TMEM38A PLCH2 P2RX5 ITPR3 PLCG1 DMD CCR7 ABL1 ITPR1 TPCN1 CHERP RASA3 LETM1 PML	NO
GO_CYTOSOLIC_LARGE_RIBOSOMAL_SUBUNIT	3.39367e-12	1.44499e-09	0.898671	0.753311	2.4909	57	RPL34 RPL17 RPL23 RPL26 RPL7 RPL36A RPL39 RPL26L1 RSL24D1 RPL9 RPL21 RPL11 RPL41 RPL27 RPL31 MRPL1 RPL35A RPL30 RPL35 RPL22L1 RPL24	NO
GO_CYTOSOLIC_PART	4.36732e-10	9.2978e-08	0.814036	0.508501	2.01899	225	RPL34 RPS24 RPL17 HBB CASP5 RPL23 RPL26 RPL7 RPL36A RPL39 RPL26L1 RSL24D1 RPS3A RPS7 RPS17 RPL9 RPL21 HBA2 HBA1 RPL11 RPS25 RPL41 PPARGC1A RPL27 RPL31 MRPL1 RPL35A BLOC1S2 RPS27A RPL30 PSMC6 RPS20 RPL35 CASP1 RPL22L1 IFIT5 MCTS1 AHSP RPS18 RPL24 RPS29 RPS6 EIF4EBP1 NLRC4 RPL5 LRRK2 EIF2A RPS11 CASP4 RPS10 BORCS7 CIAO2A BLOC1S6 RPS4Y1 PTEN FBXO45 RPL27A RPS12 BLOC1S1 HPS1 SGTB CFLAR RPS8 CASP8 RPL…	NO
GO_CYTOSOLIC_RIBOSOME	1.03073e-16	4.1693e-13	1.05746	0.693814	2.52677	105	RPL34 RPS24 RPL17 RPL23 RPL26 RPL7 RPL36A RPL39 RPL26L1 RSL24D1 RPS3A RPS7 RPS17 RPL9 RPL21 HBA2 HBA1 RPL11 RPS25 RPL41 PPARGC1A RPL27 RPL31 MRPL1 RPL35A RPS27A RPL30 RPS20 RPL35 RPL22L1 MCTS1 RPS18 RPL24 RPS29 RPS6	NO
GO_CYTOSOLIC_SMALL_RIBOSOMAL_SUBUNIT	5.44985e-06	0.000398462	0.610527	0.665372	2.09958	43	RPS24 RPS3A RPS7 RPS17 HBA2 HBA1 RPS25 RPS27A RPS20 MCTS1 RPS18 RPS29 RPS6 EIF2A RPS11 RPS10 RPS4Y1 RPS12	NO
GO_CYTOSOLIC_TRANSPORT	0.684343	0.945735	0.0419926	0.238717	0.897169	141	SORT1 RAB9B CES1 CLTCL1 VPS29 SNX3 LRRK2 AP1S1 WASHC1 RILP VAMP3 EVI5 SNX6 RAB6A RAB9A SNX2 ANKFY1 RAB5A BET1L DENND5A AP1AR AP2A1 WIPI1 KIF1B SORL1 VTI1B VPS26A SRC TBC1D17 RHOBTB3 TBC1D23 RAB29 ACTR2 DNAJC13 RAB14 SNX12 CCDC91 HEATR5A MAP2K2 MAPK1 CHMP3 TBC1D14 RAB21 GCC2 VPS35 VPS54 RIC1 PLEKHJ1 RAB7A DAB2 BECN1 TMEM87B DOP1A WASHC2C KIF5B SRSF10 EPS15 AKTIP GBF1	NO
GO_C_C_CHEMOKINE_BINDING	0.608355	0.91319	0.0828962	-0.295814	-0.893833	21	CCR8 CXCR3 CCR9 CCR6 ACKR2 CCR7 CXCR5 CCR4 ACKR3	NO
GO_DAMAGED_DNA_BINDING	0.627747	0.920318	0.0497903	0.264658	0.90654	66	NEIL3 HMGB2 RPA3 NBN KDM4D POLB HMGB1	NO
GO_DEACETYLASE_ACTIVITY	0.985337	1	0.0642141	-0.168211	-0.588808	37	MACROD2	NO
GO_DEAMINASE_ACTIVITY	0.621705	0.91714	0.0558265	0.31992	0.894082	25	RIDA APOBEC3A APOBEC3B ADAT3 ADAR APOBEC3H	NO
GO_DEFENSE_RESPONSE_TO_BACTERIUM	2.09564e-08	3.08249e-06	0.733762	0.558101	2.06231	123	S100A8 SEMG1 S100A12 SLPI RPL39 SIGLEC16 ARG2 DEFA4 S100A9 CLEC4D HMGB2 SIGLEC11 ISG15 TLR5 ANXA3 HP LCN2 STAB1 RPL30 TLR4 ROMO1 TLR3 TBK1 PPBP LYZ C5AR1 DEFA1 GBP6 P2RX7 BCL3 TLR2 CAMP CD36 RNASE3 FCER1G PGLYRP1 NLRC4 MYD88 FGR SLC11A1 LTF IL23R CEBPB TLR6 KLRK1 CARD9 CLEC4E BPI OPTN TNF CD160 NOD2 GRN ELANE HAVCR2 ADAMTS5 RIPK2	NO
GO_DEFENSE_RESPONSE_TO_FUNGUS	0.0301176	0.244404	0.352488	0.575056	1.55058	22	S100A8 S100A12 DEFA4 S100A9 ARG1 DEFA1 LTF CLEC6A ELANE DEFA3 IL17RA	NO
GO_DEFENSE_RESPONSE_TO_GRAM_NEGATIVE_BACTERIUM	0.154312	0.513859	0.135741	0.413925	1.25833	37	DEFA4 HMGB2 RPL30 TLR4 ROMO1 LYZ DEFA1 CAMP RNASE3 SLC11A1 LTF IL23R BPI OPTN CD160 ELANE	NO
GO_DEFENSE_RESPONSE_TO_GRAM_POSITIVE_BACTERIUM	0.00391719	0.0675694	0.407018	0.5584	1.72404	40	RPL39 DEFA4 HMGB2 ROMO1 TBK1 LYZ C5AR1 DEFA1 P2RX7 TLR2 CAMP CD36 RNASE3 PGLYRP1 MYD88 FGR KLRK1 CARD9 TNF HAVCR2 RIPK2	NO
GO_DEFENSE_RESPONSE_TO_OTHER_ORGANISM	5.47564e-11	1.38431e-08	0.851339	0.481979	1.9632	322	S100A8 SEMG1 S100A12 SLPI HERC5 RPL39 SIGLEC16 ARG2 DEFA4 S100A9 CLEC4D IL31RA HMGB2 SIGLEC11 ISG15 IL1B NT5C3A TLR5 ANXA3 APOBEC3A RSAD2 PLSCR1 IFIT1 RIOK3 HP BNIP3L ISG20 LCN2 IL15 SELENOK STAB1 TLR8 IFIT1B APOBEC3B LILRB1 RPL30 TREX1 CXCL10 TLR4 IFI44L RNASE2 ARG1 ROMO1 TLR3 IFITM1 TBK1 PPBP IFITM2 LYZ C5AR1 STAT1 DEFA1 IFIT5 GBP6 P2RX7 CLEC7A BCL3 TLR2 CALCOCO2 TSPAN6 PMAIP1 CAMP CD36 RNASE3 …	NO
GO_DEFENSE_RESPONSE_TO_VIRUS	0.000975669	0.0251345	0.477271	0.407176	1.59608	195	HERC5 ISG15 IL1B NT5C3A APOBEC3A RSAD2 PLSCR1 IFIT1 RIOK3 BNIP3L ISG20 IL15 SELENOK TLR8 IFIT1B APOBEC3B LILRB1 TREX1 CXCL10 IFI44L RNASE2 TLR3 IFITM1 TBK1 IFITM2 STAT1 DEFA1 IFIT5 TSPAN6 PMAIP1 BIRC2 BST2 TLR7 IFI16 OAS3 IL23R TRIM25 CARD9 DDX60 IRF5 DNAJC3 POLR3F ADAR APOBEC3H UNC93B1	NO
GO_DEFINITIVE_HEMOPOIESIS	0.710963	0.957658	0.052805	0.321636	0.825388	17	RBFOX2 TGFBR3 TEK GATA1 SP3 TAL1 HOXB3	NO
GO_DEMETHYLASE_ACTIVITY	0.953313	1	0.0347904	0.210266	0.626677	33	KDM1B KDM4D CYP51A1 ALKBH1 UTY KDM7A JMJD6 JMJD1C	NO
GO_DEMETHYLATION	0.726106	0.964722	0.0448645	0.254342	0.839642	54	APOBEC3A APOBEC3B UBE2B KDM1B KDM4D TET2 APOBEC3H CYP51A1 ALKBH1 UTY KDM7A APOBEC3F PPME1 APOBEC3G JMJD6 JMJD1C TET3	NO
GO_DENDRITE_CYTOPLASM	0.817175	0.99833	0.0706196	-0.245447	-0.779169	26	HIP1R MAP2 ADA ABHD12	NO
GO_DENDRITE_DEVELOPMENT	0.524272	0.863652	0.0523759	0.253773	0.975727	167	MAP1B CDKL3 FSTL4 LPAR1 NRP1 SEMA3A RBFOX2 ZNF365 KNDC1 PLK2 HPRT1 MEF2A EPHB1 SRGAP2 TRPC6 SRGAP2C CPEB3 LRRK2 CYFIP1 PICALM VAMP7 GORASP1 ACSL4 RAP2A PTEN KIAA0319 EFNA1 CDK5 MAP1A IQGAP1 FMR1 ASAP1 ABITRAM MAPK6 LST1 ARHGAP33 DTNBP1 CRK PSEN1 C21orf91 NEDD4 ADGRB3 EZH2 TRAK2 CDC42 CARM1 ACTR2 PPP3CA ADAM10 PDLIM5 ARF4 RERE HECW2 ABI1	NO
GO_DENDRITE_EXTENSION	0.286822	0.691209	0.129443	-0.381188	-1.11157	19	CPNE5 UNC13A PRKN BCL11A RNF157 AUTS2	NO
GO_DENDRITE_MORPHOGENESIS	0.515584	0.858423	0.0562941	0.267764	0.975031	103	CDKL3 NRP1 SEMA3A RBFOX2 ZNF365 KNDC1 HPRT1 MEF2A EPHB1 TRPC6 LRRK2 PICALM VAMP7 GORASP1 RAP2A PTEN EFNA1 CDK5 FMR1 ABITRAM ARHGAP33 DTNBP1 NEDD4 ADGRB3 TRAK2 CDC42 ACTR2 PPP3CA ADAM10 PDLIM5 RERE HECW2 ABI1 ITGB1 KIDINS220 OPA1 CUX1 RAB21 VLDLR CFL1	NO
GO_DENDRITIC_CELL_DIFFERENTIATION	0.064759	0.340195	0.216543	0.472835	1.38438	31	LILRB1 LGALS9 LYN BATF3 BATF HMGB1 CEBPB GAS6 TMEM176A AZI2 AXL SPI1 LILRB2 RBPJ GATA1 PSEN1 FCGR2B TMEM176B	NO
GO_DENDRITIC_CELL_MIGRATION	0.155039	0.514253	0.137251	0.456498	1.27578	25	TRPM4 CCR1 LGALS9 HMGB1 CXCR1 GAS6 CXCR2 CCR2 CCR5 CCL5 EPS8 SLAMF8 DOCK8 CXCR4 GPR183	NO
GO_DENDRITIC_SHAFT	0.396469	0.782605	0.0797706	0.385052	1.05727	24	NTSR1 LPAR1 SLC8A1 ZNF804A CNIH3 MAP1A	NO
GO_DENDRITIC_SPINE_DEVELOPMENT	0.46978	0.834866	0.0633597	0.28784	1.00059	72	FSTL4 LPAR1 ZNF365 PLK2 EPHB1 SRGAP2 SRGAP2C CPEB3 LRRK2 ACSL4 PTEN EFNA1 CDK5 FMR1 ASAP1 MAPK6 ARHGAP33 PSEN1 C21orf91 CDC42 ACTR2 ADAM10 PDLIM5 ARF4	NO
GO_DENDRITIC_SPINE_MAINTENANCE	0.569307	0.888958	0.0629395	0.365053	0.919792	15	ZNF804A FCGR2B TANC1 ABHD17B PRNP IGF1R VPS35 HOMER1 INSR	NO
GO_DENDRITIC_SPINE_MORPHOGENESIS	0.94375	1	0.0694481	-0.191981	-0.687758	41	KALRN BHLHB9 LZTS3 WNT7A PPP1R9A EEF2K DBN1 NLGN3 DOCK10 EPHB2 DVL1 CDK5R1 ABI2 DHX36	NO
GO_DENDRITIC_TREE	0.482124	0.841143	0.0510114	0.242817	1.00084	375	FGF13 RCVRN NTSR1 MAP1B CAMK2N1 CYP46A1 LPAR1 ANXA3 SEMA3A C4A SLC8A1 SLC4A10 GLRX5 PPARGC1A CNNM1 SORT1 GNAO1 KCNJ2 CRHBP KNDC1 KCND3 NECTIN3 PLK2 CNN3 FZD5 RIN1 ROGDI LSM1 MOB4 STAT1 C9orf72 FBXO2 NGDN CYBB EPHB1 SRGAP2 AKAP5 RPS6 CX3CR1 ZNF804A NQO1 HRH2 MT-ND1 CPEB4 SUMO1 TPGS1 CPEB3 WASF1 LRRK2 NPTXR RBM3 CYFIP1 XRN1 LRP1 RGS10 CNIH3 RAB5A SHARPIN PSMC2 TXN2 STX3 HTR7 PTEN GLRX2 CDK5 MAP1A C…	NO
GO_DEOXYRIBONUCLEASE_ACTIVITY	0.294872	0.70018	0.0894367	0.340521	1.12081	53	SLX1B TATDN1 DNASE1L3 ISG20 TREX1	NO
GO_DEOXYRIBOSE_PHOSPHATE_CATABOLIC_PROCESS	0.536082	0.869522	0.0891647	-0.31707	-0.941209	20	NEIL1 ADA DCTPP1 NEIL2 NT5C SMUG1 UNG	NO
GO_DEPHOSPHORYLATION	0.608981	0.91319	0.0408229	0.23048	0.947751	366	IGFBP3 THNSL2 DNAJC6 NT5C3A NUAK1 PLPP3 DLC1 LGALS3 ALPL MASTL CA3 PFKFB3 FKBP1B DAPP1 PTP4A1 PPP1CB PTPRG JAK2 PLEK MDP1 CTTNBP2NL PPP3R1 PTPRA PPP1R17 DUSP3 POLB DUSP6 GBA PPP4R1 PTPRM NT5C3B PPM1A DUSP23 DUSP1 NT5M CNEP1R1 DUSP12 TNF PPM1J NT5C2 SSH2 PFKFB4 PTPMT1 PTPN20 SYNJ1 PTPN12 PTPRB PPA2 PTEN NUDT16 IFNG IGBP1 PTPRE RIPK3 CPPED1 LILRB2 IQGAP1 CD300A FKBP15 PTP4A2 PPP1R3B CALM2 PTPN22 PP…	NO
GO_DESMOSOME	0.21883	0.609408	0.149208	-0.413948	-1.19327	18	DSG2 DSP PERP EVPL	NO
GO_DETECTION_OF_ABIOTIC_STIMULUS	0.66323	0.939015	0.0934449	-0.231378	-0.895788	61	CACNB3 GNA11 PKD1 WHRN TCAP NTRK1 TIMELESS PLEKHB1 TTN PIEZO1 GUCA1B CAMKMT PITPNM1 NMT2 BACE1	NO
GO_DETECTION_OF_BIOTIC_STIMULUS	0.0026606	0.0528852	0.431708	0.728592	1.83577	15	LY96 TREX1 TLR4 TLR2 PGLYRP1 NLRC4 TLR6 TLR1 CD1D NOD2	NO
GO_DETECTION_OF_CHEMICAL_STIMULUS_INVOLVED_IN_SENSORY_PERCEPTION_OF_TASTE	0.060062	0.329202	0.321776	-0.516211	-1.48805	18	TAS1R3 TAS2R43 TAS2R10 TAS2R50 TAS2R13 TAS2R3 TAS2R5 TAS2R30 TAS2R19 TAS2R46	NO
GO_DETECTION_OF_LIGHT_STIMULUS	0.61991	0.916167	0.0546808	0.298044	0.892023	34	RCVRN EYS BEST1 CCDC66 CACNA2D4 GNGT2 PDE6B CABP4 METAP2 GNAQ PPEF1 OPN3 ELOVL4 ARRB1 GRK4 FNTA	NO
GO_DETECTION_OF_MECHANICAL_STIMULUS	0.0237137	0.212451	0.352488	-0.550588	-1.6344	20	CACNB3 PKD1 WHRN TCAP NTRK1 TTN PIEZO1	NO
GO_DETECTION_OF_STIMULUS	0.314356	0.720461	0.0782955	0.282593	1.07292	151	RCVRN NTSR1 LY96 OR52K2 RPA3 OR52K1 OR5B21 EYS RBX1 TAS2R60 RPS27A ADGRV1 TREX1 TLR4 RFC4 UBE2B BEST1 TLR2 EPHB1 DNAJA1 PGLYRP1 NLRC4 PHF24 TLR6 TAS2R41 CCDC66 OR2W3 TLR1 CD1D	NO
GO_DETECTION_OF_STIMULUS_INVOLVED_IN_SENSORY_PERCEPTION	0.487874	0.843918	0.0633597	0.299372	0.988295	54	NTSR1 OR52K2 OR52K1 OR5B21 EYS TAS2R60 ADGRV1 BEST1 EPHB1 PHF24 TAS2R41 CCDC66 OR2W3	NO
GO_DETECTION_OF_VISIBLE_LIGHT	0.901716	1	0.0390355	0.244789	0.687534	26	EYS BEST1 CCDC66 CACNA2D4 PDE6B METAP2 GNAQ PPEF1 OPN3 ELOVL4 GRK4 FNTA	NO
GO_DETERMINATION_OF_HEART_LEFT_RIGHT_ASYMMETRY	0.555891	0.881175	0.0598603	0.320975	0.929325	29	STIL BBS7 ARL13B DLL1 RNF207 MICAL2 PSEN1 HIF1A IFT57 PKD2 TMED2 IFT52 BBS4 NOTCH1 MKKS SETDB2	NO
GO_DETOXIFICATION	0.287449	0.691485	0.0878313	0.313631	1.10951	83	HBB S100A9 HBA2 HBA1 HP CLIC2 MGST1 TXN MT1E PRDX5 CD36 NQO1 PRDX6 MGST3 TNF PTGS2 PRXL2C MT1X SRXN1	NO
GO_DEVELOPMENTAL_CELL_GROWTH	0.148564	0.504327	0.124434	0.314109	1.18404	146	FGF13 LPAR3 SEMA3D EFNA5 MAP1B CDKL3 FSTL4 NRP1 SEMA3A SEMA3C SEMA6B SEMA4A SHTN1 C9orf72 RGS2 SLIT1 TNFRSF12A WASF1 RAPH1 CYFIP1 LRP1 ZEB2 DRAXIN MAP3K13 CDK5 SEMA5A AURKA SEMA3B RTN4 IQGAP1 EDN1 IFRD1 SPP1	NO
GO_DEVELOPMENTAL_GROWTH	0.624866	0.919121	0.0386372	0.230006	0.950924	411	FGF13 LPAR3 SEMA3D EFNA5 FOXC1 MAP1B CDKL3 FSTL4 GAS1 NRP1 SEMA3A CACNA2D2 SLC4A10 ADM SH3PXD2B ANXA1 EYS YBX3 STK3 SEMA3C SEMA6B SEMA4A FMN1 LEPR SBDS IGF2 COPS2 VIT SHTN1 NBN BRCA2 FOXO3 DYSF WWTR1 C9orf72 BASP1 STIL TENM4 EVC RGS2 SLIT1 DUSP6 TNFRSF12A WASF1 DLL1 RAPH1 CYFIP1 ZFP36L1 LRP1 WWC2 ADAM15 TGFBR3 LATS2 ZEB2 MAPK14 SERP1 BNC2 DRAXIN PTPN12 PTEN PSAP FKBP8 MAP3K13 CDK5 SEMA5A AURKA ND…	NO
GO_DEVELOPMENTAL_GROWTH_INVOLVED_IN_MORPHOGENESIS	0.505	0.850897	0.0554793	0.258514	0.977526	150	FGF13 LPAR3 SEMA3D EFNA5 MAP1B CDKL3 FSTL4 NRP1 SEMA3A SEMA3C SEMA6B SEMA4A FMN1 SHTN1 C9orf72 SLIT1 TNFRSF12A WASF1 RAPH1 CYFIP1 LRP1 ZEB2 DRAXIN MAP3K13 CDK5 SEMA5A AURKA SEMA3B RTN4 IQGAP1 IFRD1 SPP1	NO
GO_DEVELOPMENTAL_MATURATION	0.26764	0.671158	0.0860347	0.283987	1.09361	174	SEMG1 C3 NEFL SLC26A8 NTN4 NRXN1 TBX6 C1QA FAM210B IL15 FZD5 B4GALT5 DDIT3 BRCA2 FOXO3 EPAS1 SCLT1 CX3CR1 LTF NFIA DMC1 AXL LRRK2 RAB32 TRIM58 KIF14 SEZ6L EPB42 PICALM CATSPER2 BLOC1S6 PTEN MAP3K13 SLFN14 AURKA CD63 B4GALT6 ABHD2	NO
GO_DEVELOPMENTAL_PIGMENTATION	0.876471	1	0.0701132	-0.232287	-0.7559	29	RAB38 GNA11	NO
GO_DEVELOPMENTAL_PROCESS_INVOLVED_IN_REPRODUCTION	0.378088	0.770335	0.0619763	0.251723	1.04034	395	STOX2 SEMG1 INHBB RETN MMP14 FOXC1 HMGB2 IL1B SEMA3A SLC26A8 RIMBP3C UMODL1 PCDH12 ADM ANXA1 YBX3 AKR1C3 STK3 MGST1 ALPL NECTIN3 IGF2 FZD5 TDRD1 SOCS3 PDGFRA TLR3 CDYL UBE2B BRCA2 FOXO3 BASP1 LHFPL2 EPAS1 LDOC1 BIRC2 MERTK CENPI SLIRP CEBPB SRPK1 DMC1 TPGS1 HORMAD1 KIF18A AXL ICAM1 ASCL2 ZFP36L1 PRDM1 GCM1 DNAJC19 ADAM15 CTSB JUNB CATSPER2 PTGS2 MAPK14 TNFSF10 IQCG PDGFB PTEN PSAP CEP57 SPAG16 SY…	NO
GO_DEVELOPMENT_OF_PRIMARY_FEMALE_SEXUAL_CHARACTERISTICS	0.0700549	0.352936	0.197822	0.395555	1.3549	66	INHBB RETN MMP14 FOXC1 UMODL1 PDGFRA BRCA2 FOXO3 LHFPL2 CEBPB DMC1 ICAM1	NO
GO_DEVELOPMENT_OF_PRIMARY_SEXUAL_CHARACTERISTICS	0.42298	0.803151	0.0643583	0.27161	1.01982	140	INHBB RETN MMP14 FOXC1 HMGB2 SEMA3A UMODL1 YBX3 AKR1C3 MGST1 PDGFRA TLR3 BRCA2 FOXO3 BASP1 LHFPL2 CEBPB DMC1 KIF18A ICAM1 ADAM15 TNFSF10 FANCA NCOA4 BRIP1 CASP3 AGO4 ACVR2A GATA1 TESC TGFBR1 PTX3 ARID4B GDF9 ARID4A SRC BCL2L11 EIF2S2 RARA RHOBTB3 BCL2L2 HMGCS1 IDH1 INHBA CTNNA1 NCOA1 CBL	NO
GO_DE_NOVO_PROTEIN_FOLDING	0.173979	0.54833	0.126876	0.407143	1.23771	37	HSPE1 FKBP1B BAG1 DNAJB4 HSPA14 HSPA6 TOR1A PTGES3 CCT2 HSPA1L ST13 DNAJB14 FKBP1A SELENOF HSPA8 ERO1A	NO
GO_DICARBOXYLIC_ACID_METABOLIC_PROCESS	0.981308	1	0.0673624	-0.186479	-0.684539	46	GPT2 HAAO GLUD2 GGT7	NO
GO_DICARBOXYLIC_ACID_TRANSMEMBRANE_TRANSPORTER_ACTIVITY	0.0673144	0.347526	0.287805	0.57852	1.52268	19	SLC1A7 SLC26A8 SLC1A3 SLC25A14 SLC7A11 SLC25A30	NO
GO_DICARBOXYLIC_ACID_TRANSPORT	0.108108	0.43126	0.159647	0.39369	1.29412	52	FOLR3 NTSR1 SLC1A7 SLC26A8 SLC1A3 SNCA P2RX7 FOLR2	NO
GO_DIENCEPHALON_DEVELOPMENT	0.0966767	0.406282	0.175204	0.463811	1.34288	29	HESX1 NRP1 SEMA3A UQCRQ OTX1 CDH1 ZEB2 TBX19 SEMA5A RBPJ	NO
GO_DIGESTION	0.61396	0.91446	0.0524828	0.276958	0.911599	53	ADRA2A AKR1C1 PPARGC1A AQP1 TLR4 SNX10 CD36 MGAM HRH2 NOD2 ASAH2 CHIT1 PLS1 OPRL1 F11R STRAP PTGER3	NO
GO_DIGESTIVE_SYSTEM_DEVELOPMENT	0.114391	0.443319	0.257206	-0.321527	-1.2607	69	WNT11 PKD1 DACT1 HIP1R GLI1 DCHS1 TP63 TCF7 HES1 ADA	NO
GO_DIGESTIVE_SYSTEM_PROCESS	0.740203	0.971416	0.0447749	0.256195	0.822958	47	ADRA2A AKR1C1 AQP1 TLR4 SNX10 CD36 HRH2	NO
GO_DIGESTIVE_TRACT_MORPHOGENESIS	0.0211748	0.19781	0.352488	-0.534806	-1.62886	22	WNT11 DACT1 GLI1 TP63 TCF7	NO
GO_DIOL_BIOSYNTHETIC_PROCESS	0.551724	0.880105	0.0642141	0.358429	0.930563	18	ASAH1 GBA ASAH2 SPTLC2 ACER3 SPHK1	NO
GO_DIOXYGENASE_ACTIVITY	0.915746	1	0.0325785	0.209301	0.732136	76	P4HA2 P3H3 HGD KDM4D P3H2 TET2 ASPH PTGS2 PLOD2 ALOX5 TYW5 EGLN1 ALKBH1 UTY KDM7A	NO
GO_DISORDERED_DOMAIN_SPECIFIC_BINDING	0.99169	1	0.0611693	-0.169756	-0.538889	26	NUMA1 DFFB HSPA2 TP53 RRM1 HSP90AB1 EZR AP2A2	NO
GO_DISTAL_AXON	0.243276	0.646977	0.0916795	0.287036	1.11221	184	FGF13 SLC18A1 NTSR1 NEFL NRP1 LAMP5 TIAM2 CRHBP TSHZ3 SHTN1 KIF20B C9orf72 BASP1 SNCA PALLD GLUL ZNF804A CPEB4 BLVRB LRRK2 NPTXR CYFIP1 AP1S1 ARPC5 LRP1 EXOC6 RGS10 RAB5A SYNJ1 STX3 ITSN1 CDK5 TOR1A IQGAP1 FKBP15 FMR1 ADCY10 ABITRAM TIMP2 CABP4 DTNBP1 OLFM1 PSEN1 ALS2 PARD3 CTSZ	NO
GO_DISULFIDE_OXIDOREDUCTASE_ACTIVITY	0.286576	0.691209	0.0943564	0.380482	1.13875	34	GLRX5 STAB1 GLRX TXN TMX1 SH3BGRL3 TXN2 GLRX2 GFER GSTO1 TXNDC12 TXNRD1 TXNL1 PGK1 ERO1A GSTK1 SELENOT	NO
GO_DITERPENOID_METABOLIC_PROCESS	0.108434	0.431707	0.237794	-0.362662	-1.2711	38	SDC1 APOM ALDH8A1 HSPG2 GPC2	NO
GO_DIVALENT_INORGANIC_CATION_HOMEOSTASIS	0.030303	0.244902	0.276501	0.319266	1.29669	306	CCL8 S100A8 LPAR3 FAM20A NTSR1 SLC25A27 P2RY6 TRPM4 KL S100A9 LPAR1 SGCD TPT1 LPAR6 SLC8A1 CLIC2 ADM C3AR1 SELENOK FPR2 CXCL10 F2R PDGFRA FPR3 CCR1 FPR1 DDIT3 TMEM165 PROK2 C5AR1 FKBP1B SNCA SNX10 CMKLR1 P2RX7 MT1E ANXA5 JAK2 GPR65 CD36 CCRL2 TMTC2 TRPC6 LYN CX3CR1 HMGB1 SLC11A1 MCOLN1 S1PR3 CXCR1 MICU2	NO
GO_DIVALENT_INORGANIC_CATION_TRANSMEMBRANE_TRANSPORTER_ACTIVITY	0.585366	0.899727	0.0609039	0.34573	0.909973	19	SLC39A1 SLC41A2 SLC40A1 SLC39A8 SLC30A1 MMGT1 SLC39A11 SLC39A6	NO
GO_DIVALENT_INORGANIC_CATION_TRANSPORT	0.0482063	0.300454	0.216543	0.31156	1.26424	301	CCL8 LPAR3 RCVRN SEMG1 NTSR1 CACNA1E GEM P2RY6 TRPM4 TCN2 TPT1 ADRA2A CACNA2D2 SLC8A1 BSPRY CLIC2 LGALS3 SELENOK GNAO1 KCNJ2 LILRB1 CXCL10 LILRA5 F2R CCR1 CACNA2D3 DDIT3 TMEM165 DYSF FKBP1B BEST1 SNCA P2RX7 ANXA5 TRPC6 LYN P2RY12 CALCRL SLC11A1 MCOLN1 GAS6 MICU2 SUMO1 RGS9 STAC3 ICAM1 ZDHHC17 NIPSNAP2 SLC24A4 EGF P2RX1 CATSPER2 CACNA2D4 SLC39A1 PTGS2 SLC41A2 PDGFB CDK5 ATG5 LILRB2 FMR1 SLC40A1 ZD…	NO
GO_DNA_BINDING_TRANSCRIPTION_ACTIVATOR_ACTIVITY	0.509872	0.854224	0.0516356	0.247969	0.985506	231	SATB2 RORB FOXC1 ERG MAFB MEF2B PLSCR1 ZNF300 ATF3 ST18 KLF10 VENTX YBX1 DDIT3 OTX1 FOXO3 EPAS1 MEF2A LMO2 CSRNP1 SUB1 MYBL1 BATF CEBPB NFIA BACH1 IRF5 GCM1 ETV6 JUNB KLF5 LITAF KLF4 ELF4 ZEB2 TBX19 SPI1 ATF6 TFDP1 FOS MITF CEBPD ZSCAN21 PLAGL2 RBPJ MYB GATA1 CEBPZ SP1 IRF2 PLAGL1 KLF6	NO
GO_DNA_BINDING_TRANSCRIPTION_FACTOR_BINDING	0.98521	1	0.0180135	0.179093	0.722846	282	COMMD6 PRDM5 DNAAF4 ZNF366 TCF7L2 NFYB PPARGC1A TBX6 PSMA6 SMARCD3 DDIT3 STAT1 MEF2A GTF2B LMO2 BBS7 DNAJA1 GAS2L1 HMGB1 TAF7 CEBPB SUMO1 RNF14 DLL1 SETD3 ETS2 KLF4 PADI2 MAPK14 SPI1 RBBP8 TRIP6 CDK7 HMGN3 TAF9 NCOA4 MIER1 FOS UBA3 WBP2 RBPJ WIPI1 BUD31 GTF2A2 DCAF13 NFKBIA TRIP4 SP1 NCOA2 CTBP2 MED4 HIF1A SRC BBS10 USF1 SLC30A9 LRIF1 NFE2L2 BRCA1 MED30 EOMES TRIP12 NCOA1 PSMD9 TAF11 NRIP1 HHEX G…	YES
GO_DNA_BINDING_TRANSCRIPTION_REPRESSOR_ACTIVITY_RNA_POLYMERASE_II_SPECIFIC	0.903465	1	0.0277996	0.207503	0.787828	151	PRDM5 SOX6 ATF3 NFIL3 YBX3 MXI1 FOXO3 BATF3 MXD1 IFI16 CEBPB BACH1 ZNF350 ASCL2 PRDM1 ETS2 ETV6 ZEB2 NFE2L3 SPI1 CNBP	NO
GO_DNA_BIOSYNTHETIC_PROCESS	1	1	0.0220834	0.148448	0.565891	160	ISG15 POLE2 DSCC1 RPA3 UBE2L6 RPS27A TREX1 RFC4 POLB TRIM25 HGF XRN1 FBXO4 DUSP1 KLF4 CDKN2D PDGFB TFDP1 LIG4 NEK7 LIN9 PTGES3 CCT2 SPHK1 POLI TEN1 SRC POLE4 HSP90AA1 NOP10 DCP2 POLD3	NO
GO_DNA_CATABOLIC_PROCESS	0.126506	0.466188	0.151149	0.444583	1.30166	31	HMGB2 DNASE1L3 ISG20 TREX1 HMGB1 PAM16 KPNB1 CASP3 XRN2 KPNA1 ERI1 DNASE1L1 BAX DICER1 DNASE2 CECR2 APAF1	NO
GO_DNA_CATABOLIC_PROCESS_ENDONUCLEOLYTIC	0.269767	0.674419	0.0995791	0.416386	1.16367	25	HMGB2 DNASE1L3 HMGB1 PAM16 KPNB1 CASP3 KPNA1 DNASE1L1 BAX DICER1 DNASE2 CECR2 APAF1	NO
GO_DNA_CONFORMATION_CHANGE	0.489933	0.845093	0.16318	-0.216761	-0.987549	201	PIF1 RECQL4 CDC45 GINS1 RAD51 MCM2 GINS4 BAHD1 CABIN1 CENPK CHD3 TTN DDX11 NAA10 SMARCA1 GINS2 ERCC2 NCAPD3 ABL1 CDCA5 PARP1 MCM4 DFFB PARP10 MCM7 TSPYL2 RTEL1 SMC2 TSSK6 IPO4 TOP3B GRWD1 CENPU HMGA1 TSPYL4 ACIN1 HJURP CDAN1 SMARCAL1 RUVBL1 PAF1 AKAP8L NOC2L NAP1L5 RNF8 CDK1 HMGB3 CENPV CENPC RUVBL2 RPA1 CHD4 NAA60 TOP1MT TP53 CHAF1A DHX30 DHX36 NCAPD2 IGHMBP2 DAXX BLM CCNB1 HELB	NO
GO_DNA_DAMAGE_RESPONSE_DETECTION_OF_DNA_DAMAGE	0.298507	0.705495	0.0913924	0.367655	1.12373	38	RPA3 RBX1 RPS27A TREX1 RFC4 UBE2B DNAJA1	NO
GO_DNA_DAMAGE_RESPONSE_SIGNAL_TRANSDUCTION_BY_P53_CLASS_MEDIATOR	0.0585106	0.325929	0.213928	0.375957	1.35042	94	RPS6KA6 RPL26 MYO6 PLK2 TRIAP1 NBN BRCA2 FOXO3 BCL3 PMAIP1 BATF SPRED2 AURKA TFDP1 E2F8 PLAGL1 SP100 CDKN1A ZNF385A BRCA1 DYRK3 CARM1 PSMD10 GADD45A HIC1 EEF1E1	NO
GO_DNA_DAMAGE_RESPONSE_SIGNAL_TRANSDUCTION_RESULTING_IN_TRANSCRIPTION	0.0243049	0.214425	0.352488	0.646423	1.63683	16	RPS6KA6 RPL26 BRCA2 SP100 ZNF385A BRCA1	NO
GO_DNA_DEALKYLATION	0.912308	1	0.0378488	0.232705	0.668023	28	APOBEC3A APOBEC3B TET2 APOBEC3H ALKBH1 APOBEC3F APOBEC3G TET3 APOBEC3C ALKBH3	NO
GO_DNA_DEMETHYLATION	0.889423	1	0.0409056	0.254489	0.686202	22	APOBEC3A APOBEC3B TET2 APOBEC3H ALKBH1 APOBEC3F APOBEC3G TET3 APOBEC3C ALKBH3	NO
GO_DNA_DEPENDENT_ATPASE_ACTIVITY	0.319549	0.72546	0.15017	-0.25839	-1.04626	85	PIF1 RECQL4 RAD51 XRCC3 CHD3 DDX11 SMARCA1 ERCC2 ERCC6L MCM4 MCM7 RTEL1 CHTF18 SMARCAL1 RUVBL1 SMARCA4 RAD51D RUVBL2 CHD4 DHX30 DHX36 IGHMBP2 BLM HELB RFC3 TTF2 POLQ	NO
GO_DNA_DEPENDENT_DNA_REPLICATION	0.480952	0.840368	0.13649	-0.225654	-0.988654	141	ORC1 CCNE1 CDC45 ORC6 GINS1 RAD51 TIMELESS CDC6 MCM2 GINS4 POLD1 DDX11 NUGGC MCM10 GINS2 MCM4 MCM7 WDR18 RTEL1 EME2 TONSL POLG HMGA1 CHTF18 POLD2 E2F7 SMARCAL1 POLE WIZ STOML2 DBF4B LIG1 CDT1 RPAIN	NO
GO_DNA_DEPENDENT_DNA_REPLICATION_MAINTENANCE_OF_FIDELITY	0.671875	0.941859	0.0873098	-0.244614	-0.876309	41	RAD51 TIMELESS POLD1 DDX11 RTEL1 EME2 TONSL SMARCAL1 POLE	NO
GO_DNA_DIRECTED_DNA_POLYMERASE_ACTIVITY	0.605042	0.910998	0.0870516	-0.289481	-0.908333	25	DNTT POLD1 POLL POLM POLG POLD2 POLE	NO
GO_DNA_DOUBLE_STRAND_BREAK_PROCESSING	0.11859	0.452116	0.161979	0.483551	1.31646	23	SLX1B NBN RBBP8 RNF138 BRIP1 DNA2 UBE2V2 BRCA1 UBE2N	NO
GO_DNA_GEOMETRIC_CHANGE	0.286275	0.691125	0.16318	-0.26356	-1.08274	92	PIF1 RECQL4 CDC45 GINS1 RAD51 MCM2 GINS4 CHD3 DDX11 SMARCA1 GINS2 ERCC2 PARP1 MCM4 MCM7 RTEL1	NO
GO_DNA_HELICASE_ACTIVITY	0.00224075	0.046573	0.431708	-0.480009	-1.77505	48	PIF1 RECQL4 CDC45 GINS1 GINS4 CHD3 DDX11 GINS2 ERCC2 MCM4 MCM7 RTEL1 RUVBL1 RUVBL2 CHD4 DHX30 DHX36 IGHMBP2 BLM HELB	NO
GO_DNA_HELICASE_COMPLEX	0.20202	0.58489	0.155242	-0.440983	-1.22211	15	INO80B RUVBL1 ACTL6A NFRKB INO80E RUVBL2 ACTR5	NO
GO_DNA_INTEGRITY_CHECKPOINT	0.987578	1	0.0232248	0.182674	0.691067	148	RPL26 MAP3K20 PLK2 FBXO6 TRIAP1 TREX1 NEK11 NBN ETAA1 SYF2 FBXO4 MAPK14 AURKA TFDP1 BRIP1 NAE1 STK33 E2F8 DNA2 RHNO1 PLAGL1 CEP63 TIPRL CDKN1A BRCC3 ZNF385A PPP1R10 BRCA1 PEA15 CARM1 WAC GADD45A FOXO4	NO
GO_DNA_LIGATION	0.141196	0.491936	0.15017	0.515227	1.32219	17	HMGB2 XRCC4 POLB HMGB1 APLF LIG4	NO
GO_DNA_METHYLATION	0.211039	0.599176	0.173748	-0.309235	-1.1597	50	STPG4 ZFP57 HEMK1 PIWIL2 BEND3 TRIM28 TDRKH DNMT3A MYC EHMT2 PARP1	NO
GO_DNA_METHYLATION_OR_DEMETHYLATION	0.630996	0.921953	0.100633	-0.231541	-0.907864	69	STPG4 ZFP57 HEMK1 APOBEC3D PIWIL2 BEND3 TRIM28 TDRKH DNMT3A MYC EHMT2 PARP1 FTO	NO
GO_DNA_MODIFICATION	0.397638	0.783461	0.13649	-0.245514	-1.00799	91	STPG4 ZFP57 NEIL1 DNTT HEMK1 APOBEC3D PIWIL2 BEND3 TRIM28 TDRKH DNMT3A MYC EHMT2 PARP1 FTO EXOSC5 PRMT7 NEIL2 EHMT1 N6AMT1	NO
GO_DNA_PACKAGING	0.970833	1	0.0828962	-0.181782	-0.758073	108	MCM2 BAHD1 CABIN1 CENPK TTN NAA10 NCAPD3 CDCA5 DFFB PARP10 TSPYL2 SMC2 TSSK6 IPO4 GRWD1 CENPU HMGA1 TSPYL4 ACIN1 HJURP CDAN1 RUVBL1 PAF1 AKAP8L NOC2L NAP1L5 RNF8 CDK1 CENPV CENPC NAA60 TP53 CHAF1A NCAPD2 DAXX CCNB1 KAT6B SHPRH	NO
GO_DNA_PACKAGING_COMPLEX	0.953488	1	0.0597318	-0.218964	-0.638514	19	IRF4 NCAPD3 SMC2 NCAPD2 KAT6B SHPRH NCAPG	NO
GO_DNA_POLYMERASE_ACTIVITY	0.807692	0.995901	0.0745501	-0.243463	-0.806998	30	DNTT POLD1 POLL POLM POLG POLD2 POLE	NO
GO_DNA_POLYMERASE_BINDING	0.2025	0.585917	0.154191	-0.421651	-1.20211	17	RAD51 LONP1 RTEL1 NAT10 CDT1 SMARCA4 CDK2AP1 FANCD2 SMG6 HSP90AB1	NO
GO_DNA_RECOMBINATION	0.877698	1	0.122679	-0.187449	-0.876906	232	PIF1 RECQL4 CDC45 TRIP13 AP5S1 RAG1 RAD51 C11orf80 HUS1B TCF7 XRCC3 TIMELESS MRNIP EXO1 RNF212 GINS4 SLX4 POLL CCR6 XRCC1 GINS2 ERCC2 CHEK1 POLM FOXP3 PARP1 LEF1 RTEL1 EME2 SWI5 PAXIP1 TONSL APEX2 INO80B CD40LG RBM14 TCF3 SWAP70 CD40 RUVBL1 AP5Z1 RPAIN BCL11B IL27RA RNF8 SWSAP1 RAD51D ACTL6A TP53BP1 NSD2 NFRKB HMGB3 KLHDC3 CD28 MAGEF1 MCM8 INO80E RUVBL2 ACTR5 PRKDC RPA1 NSMCE3	NO
GO_DNA_REPAIR	0.998941	1	0.0113146	0.168936	0.704998	483	SLX1B NEIL3 FANCL POLR2K RAD51AP1 ATP23 HMGB2 ISG15 POLE2 XRCC4 ZNF365 RPA3 UBE2L6 RBX1 RPS27A FBXO6 TREX1 COPS2 RFC4 NBN UBE2B BRCA2 PARPBP ETAA1 DEK NABP1 KDM4D SPIRE1 COPS5 COPS4 POLB HMGB1 SFR1 SHLD3 TRIM25 APLF BACH1 DMC1 SUMO1 FIGNL2	NO
GO_DNA_REPAIR_COMPLEX	0.836611	1	0.0410713	0.24716	0.751366	37	ATP23 XRCC4 LIG4 RCOR1 PHF21A MLH3 ZSWIM7 XPA PMS1 RAD23B	NO
GO_DNA_REPLICATION	0.227941	0.622357	0.257206	-0.226625	-1.06661	254	PIF1 RECQL4 RRM2 ORC1 CCNE1 CDC45 ORC6 GINS1 ID3 GLI1 RAD51 TIMELESS CDC6 EXO1 MCM2 GINS4 POLD1 SLX4 JUN DDX11 POLL ESCO2 NUGGC CCNA2 MCM10 GINS2 CHEK1 EHMT2 MCM4 MCM7 WDR18 TSPYL2 RTEL1 EME2 TONSL POLG GRWD1 RBM14 HMGA1 PCLAF ING5 CHTF18 RAD9A REPIN1 POLD2 CDAN1 E2F7 SMARCAL1 POLE WIZ STOML2 DBF4B LIG1 CDT1 RPAIN	NO
GO_DNA_REPLICATION_CHECKPOINT	0.0436614	0.288779	0.321776	-0.560618	-1.55366	15	ORC1 CDC45 HUS1B TIMELESS CDC6	NO
GO_DNA_REPLICATION_FACTOR_A_COMPLEX	0.806397	0.995901	0.0476387	0.297482	0.753263	16	RPA3 BCAS2	NO
GO_DNA_REPLICATION_INDEPENDENT_NUCLEOSOME_ORGANIZATION	0.685801	0.946456	0.0500923	0.28513	0.859326	35	HAT1 CENPQ CENPN CENPI CENPS CENPP MIS18BP1 ITGB3BP	NO
GO_DNA_REPLICATION_INITIATION	0.0714034	0.355479	0.287805	-0.402313	-1.36528	34	ORC1 CCNE1 CDC45 ORC6 CDC6 MCM2 MCM10 MCM4 MCM7 WDR18	NO
GO_DNA_REPLICATION_ORIGIN_BINDING	0.000872385	0.0234472	0.477271	-0.71596	-2.04117	17	ORC1 CDC45 ORC6 CDC6 MCM2 DDX11 MCM10 GRWD1	NO
GO_DNA_SECONDARY_STRUCTURE_BINDING	0.597111	0.906863	0.0593488	0.328791	0.902786	24	NEIL3 HMGB2 HMGB1 RBBP8	NO
GO_DNA_STRAND_ELONGATION	0.533505	0.869087	0.0894367	-0.318254	-0.944722	20	GINS1 GINS4 GINS2 POLD2 POLE LIG1	NO
GO_DNA_SYNTHESIS_INVOLVED_IN_DNA_REPAIR	0.0725689	0.357817	0.199915	0.422561	1.36413	48	ISG15 POLE2 RPA3 UBE2L6 RPS27A TREX1 RFC4 TRIM25 CDKN2D	NO
GO_DNA_TEMPLATED_TRANSCRIPTION_ELONGATION	1	1	0.0831291	-0.101684	-0.418058	101	ELL3 POLR2I NELFA ERCC2 TAF1C SUPT5H TCEA2 UBTF CCAR2 NELFB PAF1 CTDP1 TBP POLR2D PCID2 RNF8 LDB1 SSRP1 POLR1B RTF1 POLR2E SUPT6H ELP2 DDX39B ALYREF POLR1A NCBP1	NO
GO_DNA_TEMPLATED_TRANSCRIPTION_INITIATION	1	1	0.0978773	-0.137481	-0.627203	186	CCN2 NR1D1 CCND1 ESR1 ESR2 BRF1 MAZ JUN MED24 POLR2I MED26 TRIM28 TAF4B ERCC2 TAF6L POLR3H TAF1C POLRMT WNT10B PPARD SMARCB1 PAXIP1 THRA UBTF GTF2I GTF3C1 NR2C2AP TAF4 TAF3 TBP POLR2D SMARCA4 NR3C2 PIH1D1 CDK1 TAF6 SRF PSMC5	NO
GO_DNA_TEMPLATED_TRANSCRIPTION_TERMINATION	0.912449	1	0.0322878	0.213086	0.73662	69	POLR2K SNRPG SNRPE GTF2H5 SNRPD3 CDK7 SMN2 TAF1B SNRPF XRN2 MNAT1 MED18 TAF1D GTF2H1 POLR2H	NO
GO_DOPAMINE_RECEPTOR_SIGNALING_PATHWAY	0.955128	1	0.0376143	0.227279	0.618762	23	GNAO1 RGS9 LRRK2 NCSTN GNAI3 DTNBP1	NO
GO_DORSAL_VENTRAL_PATTERN_FORMATION	0.670695	0.941624	0.0511148	0.287668	0.866974	35	CXXC4 DDIT3 ARL13B AIDA FKBP8 EDN1 FBXL15 PSEN1	NO
GO_DOSAGE_COMPENSATION	0.159933	0.523625	0.141225	0.51107	1.2941	16	CDYL SMCHD1 PCGF6 PCGF5 EIF1 LRIF1 BRCA1 RLIM	NO
GO_DOUBLE_STRANDED_RNA_BINDING	0.98893	1	0.0755015	-0.171043	-0.670652	69	ADARB2 DGCR8 STRBP ADARB1 OAS2 OASL ELAVL1 DHX58	NO
GO_DOUBLE_STRAND_BREAK_REPAIR	0.970554	1	0.0211456	0.18674	0.734301	204	SLX1B RAD51AP1 ATP23 XRCC4 ZNF365 RPA3 NBN BRCA2 PARPBP DEK NABP1 KDM4D SPIRE1 POLB SFR1 SHLD3 APLF DMC1 SUMO1 FIGNL2 SMCHD1 TDP2 SPIRE2 SHLD2 RBBP8 NUDT16 RNF138 BRIP1 LIG4 PPP4R2 RMI1	NO
GO_DRUG_CATABOLIC_PROCESS	0.374486	0.767848	0.0745501	0.308561	1.05287	65	HBB RIDA ACHE HBA2 HBA1 MAOA HP SNCA PRDX5 SULT1B1 PRDX6	NO
GO_DRUG_METABOLIC_PROCESS	0.632319	0.922752	0.0421619	0.23729	0.935851	217	HBB RIDA CYP46A1 ACHE TCN2 HBA2 HBA1 NT5C3A AKR1C1 MAOA HP PEMT AKR1C3 HPRT1 BAD SNCA PRDX5 FOLR2 CYBB TLR2 AK1 SRR SULT1B1 TPMT TLR6 PRDX6 MTHFD2	NO
GO_DRUG_TRANSMEMBRANE_TRANSPORT	0.0148739	0.161992	0.38073	0.495291	1.59099	47	SLC18A1 NTSR1 SLC1A7 ABCG2 AQP1 SLC1A3 FOLR2 RGS2 SLC1A5 SLC22A1 SLC15A4 RHAG	NO
GO_DRUG_TRANSMEMBRANE_TRANSPORTER_ACTIVITY	0.0740741	0.361813	0.195789	0.408313	1.34808	56	SLC18A1 SLC1A7 ABCG2 AQP1 SLC1A3 SLC1A5 SLC22A1 SLC15A4 SLC38A5 RHAG	NO
GO_DRUG_TRANSPORT	0.0155474	0.167259	0.38073	0.413237	1.50495	105	SLC18A1 HBB FOLR3 RETN NTSR1 SLC1A7 TCN2 HBA2 HBA1 ABCG2 AQP1 SLC1A3 ARG1 SNCA FOLR2 RGS2 SLC1A5 SLC22A1 TAF7 SLC11A1 SLC15A4 SLC38A5 RHAG	NO
GO_DYNEIN_COMPLEX	0.0596165	0.328296	0.321776	0.501751	1.46904	31	DNAH14 NME8 DYNC2LI1 CCDC65 DYNLT3 DNAH17 DYNC1LI1 DYNLT1	NO
GO_DYNEIN_COMPLEX_BINDING	0.615	0.915091	0.0799859	-0.31169	-0.888617	17	NEFH CENPF NUMA1 BICD1 DCTN1	NO
GO_DYNEIN_INTERMEDIATE_CHAIN_BINDING	0.703704	0.953915	0.0758887	-0.276587	-0.842402	22	SPTBN5 DNAH10 DNAAF5 BAG3 DNAH8 BICD1 DNHD1 DNAH1	NO
GO_DYNEIN_LIGHT_INTERMEDIATE_CHAIN_BINDING	0.645265	0.92927	0.0557104	0.314407	0.863289	24	DNAH14 DNAH17 RILP CCDC88A RILPL2 DNAH6 DNAH7 DYNLL1 RILPL1	NO
GO_EARLY_ENDOSOME	0.740614	0.971416	0.0334562	0.221632	0.893853	275	NRP1 RABGEF1 B2M LAMP5 ANXA1 SORT1 ACKR1 FCGR1A FZD5 TLR4 F2R TLR3 TMEM165 SIAH2 RNF11 DYSF UBXN6 PTP4A1 VPS29 RAB31 WASHC3 EPHB1 NUMB SNX3 CMTM6 RAB32 SNX21 WASHC1 LRP1 SGK3 FGD2 PICALM SNX6 FLOT1 LITAF TMEM9B SNX2 VAMP8 TICAM2 WDFY1 ANKFY1 RAB5A TFRC KIAA0319 HAVCR2 NCSTN AP1AR FKBP15 PTP4A2 IGF2R MME ZFYVE16 SORL1 VTI1B ARRDC3 ADRB2 PSEN1 ALS2 RUBCN WASHC4 VPS26A HLA-F ATP9A MMGT1 STX12 TRAK2 …	NO
GO_EARLY_ENDOSOME_MEMBRANE	0.432115	0.808654	0.0649408	0.276172	1.01267	113	RABGEF1 B2M LAMP5 ANXA1 FCGR1A FZD5 TMEM165 UBXN6 RAB31 EPHB1 SNX3 CMTM6 SNX21 WASHC1 FGD2 SNX6 LITAF TMEM9B SNX2 VAMP8 TICAM2 RAB5A KIAA0319	NO
GO_EAR_DEVELOPMENT	0.333333	0.738004	0.158514	-0.253694	-1.04447	104	SOBP HOXA1 CELSR1 SCRIB WHRN STOX1 TCAP SPRY2 DCHS1 TMIE HES1 MCM2 PTK7 IFT27 DVL2 CCNA2 TPRN	NO
GO_EAR_MORPHOGENESIS	0.0302719	0.2449	0.352488	-0.398165	-1.49161	52	SOBP HOXA1 CELSR1 SCRIB WHRN STOX1 TCAP SPRY2 TMIE PTK7 DVL2	NO
GO_ELECTRON_TRANSFER_ACTIVITY	0.0709505	0.354754	0.193813	0.37069	1.32678	92	P4HA2 COX6C COX7A2 UQCRB NDUFA4 GLRX5 GLRX UQCRH UQCRHL UQCRQ COX7B CYBB ME1 NQO1 NQO2 ASPH COX7C SH3BGRL3 COX6A1 NDUFAF2 GLRX2 NDUFS6 COX5B CYBA DEGS1 DLD NCF2 ALDH4A1 TXNRD1 UQCR10 NCF1 ALDH2 SDHB COX7A2L NDUFA12 STEAP4 COX15	NO
GO_ELECTRON_TRANSPORT_CHAIN	0.00194743	0.0416792	0.45506	0.407168	1.55058	158	NDUFB3 P4HA2 COX6C COX7A2 UQCRB NDUFA4 NDUFA5 GLRX5 PPARGC1A NDUFB1 NDUFA1 GLRX UQCRH UQCRHL NDUFA6 UQCRQ COX7B SNCA NDUFS5 CYBB ME1 NDUFA3 NQO1 NQO2 MT-ND1 MT-ND2 ASPH NDUFA2 NDUFS4 COX7C SH3BGRL3 COX6A1 ETFRF1 NDUFAB1 NDUFAF2 GLRX2 NDUFB6 NDUFS6 MT-ND4 BID MT-ND4L COX5B UQCRC2 NDUFB5 CYBA DEGS1 COA6 DLD UQCC3 NCF2 ALDH4A1	NO
GO_EMBRYONIC_AXIS_SPECIFICATION	0.0193395	0.189186	0.352488	0.631082	1.66103	19	CXXC4 TBX6 FZD5 BASP1 STIL	NO
GO_EMBRYONIC_CAMERA_TYPE_EYE_DEVELOPMENT	0.984536	1	0.0580984	-0.178195	-0.528963	20	PPP1R13L LRP6	NO
GO_EMBRYONIC_CRANIAL_SKELETON_MORPHOGENESIS	0.809659	0.995905	0.0723571	-0.249264	-0.801105	28	PAX5 HOXA1 MTHFD1L MTHFD1 AUTS2	NO
GO_EMBRYONIC_DIGIT_MORPHOGENESIS	0.574018	0.892314	0.0583453	0.307131	0.925634	35	MAP3K20 LNPK TMEM107 FLVCR1 BCL2L11 HDAC2 SFRP2 IFT52 ECE1 TMEM231 NOTCH1 BAX FZD6 NOG INTU TBC1D32 IFT122	NO
GO_EMBRYONIC_HEART_TUBE_DEVELOPMENT	0.515885	0.858747	0.0635008	0.319333	0.970773	37	FOXC1 STIL BBS7 ARL13B DLL1 RNF207 MICAL2 PSEN1 HIF1A IFT57 PKD2	NO
GO_EMBRYONIC_HEMOPOIESIS	0.9175	1	0.0599892	-0.246187	-0.701869	17	ZFPM1 FLT3LG	NO
GO_EMBRYONIC_MORPHOGENESIS	0.651376	0.933107	0.165657	-0.198579	-0.952442	315	WNT11 FGF2 PAX5 COL7A1 CC2D2A ATOH8 LAMB3 SOBP BBS5 HOXA1 CELSR1 DACT1 SCRIB WHRN STOX1 GLI1 AFF3 LAMA5 TCAP FUZ SPRY2 TP63 FLT1 TCF7 TMIE HOXB4 HES1 FBN1 KAT2A PTK7 ENG WNT7A MTHFD1L LRP6 DVL2 CDON ARFRP1 TRIM28	NO
GO_EMBRYONIC_ORGAN_DEVELOPMENT	0.244604	0.648803	0.245042	-0.227417	-1.06255	230	WNT11 PAX5 CC2D2A SOBP BBS5 HOXA1 PPP1R13L CELSR1 PKD1 ZFPM1 SCRIB WHRN ID3 STOX1 GLI1 TCAP FUZ SPRY2 TCF7 TMIE HOXB4 FLT3LG HES1 FBN1 ADA PTK7 ENG FBXW8 MTHFD1L PLK4 LRP6 DVL2 TRIM28	NO
GO_EMBRYONIC_ORGAN_MORPHOGENESIS	0.0547427	0.316539	0.321776	-0.289397	-1.25567	132	WNT11 PAX5 SOBP BBS5 HOXA1 CELSR1 SCRIB WHRN STOX1 GLI1 TCAP FUZ SPRY2 TCF7 TMIE HOXB4 HES1 FBN1 PTK7 ENG MTHFD1L LRP6 DVL2	NO
GO_EMBRYONIC_PATTERN_SPECIFICATION	0.00098871	0.0251345	0.45506	0.618912	1.85236	34	SATB2 CXXC4 NRP1 SEMA3A TBX6 FZD5 BASP1 STIL DLL1	NO
GO_EMBRYONIC_PLACENTA_DEVELOPMENT	0.0366197	0.269077	0.282013	0.426178	1.42833	60	PCDH12 ADM STK3 IGF2 FZD5 SOCS3 EPAS1 CEBPB ASCL2 ZFP36L1 PRDM1 GCM1 JUNB PDGFB RBPJ CASP8 CDKN1C EGLN1 E2F8 SP3 HIF1A FGFR2 PKD2 EOMES NCOA1 KRT8 DNAJB6 TMED2 ZNF568 MAPK1	NO
GO_EMBRYONIC_PLACENTA_MORPHOGENESIS	0.090312	0.393659	0.190023	0.537104	1.39444	18	ADM IGF2 FZD5 SOCS3 ZFP36L1 GCM1 CDKN1C FGFR2 NCOA1 DNAJB6 ZNF568	NO
GO_EMBRYONIC_SKELETAL_SYSTEM_DEVELOPMENT	0.698006	0.951305	0.0466015	0.26198	0.8623	53	SATB2 MMP14 PDGFRA	NO
GO_EMBRYONIC_SKELETAL_SYSTEM_MORPHOGENESIS	0.358519	0.759414	0.0808589	0.349471	1.0758	39	SATB2 MMP14 PDGFRA	NO
GO_EMBRYO_DEVELOPMENT_ENDING_IN_BIRTH_OR_EGG_HATCHING	0.922747	1	0.0184736	0.19863	0.820415	409	SATB2 STOX2 MMP14 FOXC1 RPS7 SF3B6 LPAR6 DLC1 SOX6 PCDH12 ADM TBX6 PEMT HOPX FZD1 YBX3 STK3 SEMA3C SBDS IGF2 FZD5 SOCS3 COPS2 PDGFRA NBN UBE2B BRCA2 KIF20B STIL EPAS1 TRIM71 CEBPB C5 SYF2 HORMAD1 ARL13B SDC4 DLL1 ASCL2 BTF3 ZFP36L1 NDUFA2 PRDM1 GCM1 JUNB TMEM107 SLC39A1 ZEB2 ACSL4 PLXNA2 RBBP8 PDGFB FKBP8 COPS3 PLXNB2 MT-ND4 RICTOR RTN4 ZFAND5 LIG4 EDN1 FLVCR1 RBPJ CASP8 CDKN1C ACVR2A AKIRIN2 EGL…	NO
GO_EMBRYO_IMPLANTATION	0.349398	0.752964	0.0831291	0.379394	1.10322	30	IL1B PRLR VMP1 ACVR1C PTGS2 SPP1 IGFBP7 BSG MMP9 AGO2 SOD1 TIMP1 ACVR1B SMURF2	NO
GO_ENDOCARDIAL_CUSHION_DEVELOPMENT	0.132316	0.476383	0.195789	-0.455208	-1.3122	18	NOS3 DCHS1 CRELD1 ENG	NO
GO_ENDOCHONDRAL_BONE_MORPHOGENESIS	0.192537	0.572868	0.118815	0.400309	1.22353	38	MMP14 FOXC1 COL13A1 ALPL VIT	NO
GO_ENDOCRINE_HORMONE_SECRETION	0.275969	0.679218	0.0982123	0.413992	1.15698	25	INHBB RETN IL1B CRHBP HCAR2	NO
GO_ENDOCRINE_PANCREAS_DEVELOPMENT	0.55609	0.881175	0.0626618	0.343536	0.926308	22	ANXA1 BAD RHEB DLL1	NO
GO_ENDOCRINE_PROCESS	0.477504	0.837351	0.0652353	0.310469	0.997299	47	INHBB RETN IL1B CES1 CRHBP F2R SUCNR1 HCAR2 SERPINF2	NO
GO_ENDOCRINE_SYSTEM_DEVELOPMENT	0.769339	0.982605	0.0415718	0.242165	0.816531	62	HESX1 ANXA1 PDGFRA BAD CDH1 RHEB DLL1	NO
GO_ENDOCYTIC_RECYCLING	1	1	0.0635008	-0.133599	-0.467651	37	RAB11FIP3 EHD3 PTPN23 DENND1C VPS51 INPP5F CCDC22 SNX17 EIPR1 MICALL1	NO
GO_ENDOCYTIC_VESICLE	0.0202424	0.193111	0.352488	0.339625	1.35452	235	HBB MSR1 HLA-DQA2 COLEC12 HBA2 LPAR1 HBA1 ANXA3 B2M HP MYO6 RAB9B STAB1 FCGR1A RPS27A RAB39A FZD5 CLTCL1 DYSF RAB23 RAB31 RAB24 CYBB TLR2 SRGAP2 CD36 SCARB2 ABCA1 PGLYRP1 TLR7 TAP2 PLEKHG5 SLC11A1 LTF MCOLN1 SNX3 TLR6 RAB32 TAP1 LRP1 RILP TLR1 VAMP3 PICALM UNC93B1 RAB9A VAMP7 VAMP8 RAB8B RAB5A FCHO2 ITSN1 CD163 STXBP3 ATG5 ZYX RAB12 AP2A1 CLTB IGF2R PLD1 ITGAV CYBA ATP6V0E1 FLOT2 NCF2 RAB11A LPAR…	NO
GO_ENDOCYTIC_VESICLE_MEMBRANE	0.0567742	0.321416	0.213928	0.352286	1.31112	127	MSR1 HLA-DQA2 COLEC12 ANXA3 B2M RAB9B STAB1 FCGR1A RPS27A RAB39A FZD5 RAB23 RAB31 CYBB TLR2 CD36 SCARB2 TAP2 SLC11A1 MCOLN1 TLR6 RAB32 TAP1 LRP1 RILP TLR1 VAMP3 PICALM RAB9A VAMP7 VAMP8 RAB8B RAB5A FCHO2 CD163 ATG5	NO
GO_ENDOCYTOSIS	0.00348449	0.0639218	0.431708	0.331286	1.36912	394	HBB CD177 C3 MSR1 NLGN4Y CD163L1 ACHE COLEC12 HBA2 HBA1 DNAJC6 AIF1 CLEC9A DOCK1 RABGEF1 B2M ASGR2 HP LGALS3 RIN2 LGALS3BP ADM MYO6 SORT1 STAB1 FPR2 FCGR1A LILRB1 RIN1 CLTCL1 SCARA5 ASGR1 C9orf72 SNCA SNX10 RAB31 MRC1 FOLR2 CLEC7A LDLRAD3 RHOU CD36 TRIP10 SCARB2 CD14 FCER1G ABCA1 CALCRL LOXL3 NUMB CXCR1 TFR2 CXCL16 FCN1 WASF1 DLL1 AXL LRRK2 RHOQ AP1S1 LRP1 MCTP1 KIAA1109 SIGLEC1 EGF CXCR2 RAB4B P…	NO
GO_ENDODEOXYRIBONUCLEASE_ACTIVITY	0.233232	0.631685	0.107554	0.391044	1.18175	36	SLX1B TATDN1 DNASE1L3 APLF	NO
GO_ENDODEOXYRIBONUCLEASE_ACTIVITY_PRODUCING_5_PHOSPHOMONOESTERS	0.0463939	0.295766	0.321776	0.607571	1.53084	15	SLX1B TATDN1 DNASE1L3	NO
GO_ENDODERM_DEVELOPMENT	0.611852	0.914396	0.0544556	0.293447	0.903336	39	MMP14 MMP8 HSBP1 ZFP36L1	NO
GO_ENDODERM_FORMATION	0.395349	0.782381	0.0780892	0.378648	1.05821	25	MMP14 MMP8 HSBP1	NO
GO_ENDOLYSOSOME	0.275862	0.679161	0.101714	0.452409	1.17456	18	TLR8 TLR3 TLR7 CTSS CTSL CTSB AP2A1	NO
GO_ENDOMEMBRANE_SYSTEM_ORGANIZATION	0.911991	1	0.0207818	0.200844	0.822714	348	PLSCR4 CHMP5 MYOF PLSCR1 SEC16B SPTA1 VRK1 PDCD10 BLOC1S2 EPB41L3 SHTN1 F2R SRGN RAB33B ARV1 DYSF SNX10 P2RX7 VMP1 SCARB2 ABCA1 SNX3 LNPK LRRK2 RILP OPTN FLOT1 CNEP1R1 ATP8B4 ARL6IP1 TICAM2 GORASP1 RTN3 CAVIN2 SERP1 SYNJ1 RAB2A SH3GLB1 PTEN FCHO2 PSAP CHMP2B BLOC1S1 PI4K2B BNIP1 TMED5 GOLGA8H RTN4 TOR1A ASAP1 SPAST MTSS2 DNAJC28 CHMP2A CHMP4A TMED7 ATP8B3 HIKESHI VPS37A PPP2R2A DTNBP1 PARP11 RAB2…	NO
GO_ENDONUCLEASE_ACTIVITY	0.690695	0.948616	0.0432769	0.243141	0.886334	106	SLX1B RIDA TATDN1 DNASE1L3 RNASE2 YBEY RNASE3 APLF ZC3H12C RNASE4 LACTB2 RBBP8 NUDT16 SLFN14 TSNAX TSEN15 MRPL44 DNA2 PXDNL RNASEK	NO
GO_ENDONUCLEASE_ACTIVITY_ACTIVE_WITH_EITHER_RIBO_OR_DEOXYRIBONUCLEIC_ACIDS_AND_PRODUCING_3_PHOSPHOMONOESTERS	0.16113	0.525669	0.1396	0.507149	1.30145	17	SLX1B RIDA RNASE2 RNASE4 TSEN15	NO
GO_ENDONUCLEASE_ACTIVITY_ACTIVE_WITH_EITHER_RIBO_OR_DEOXYRIBONUCLEIC_ACIDS_AND_PRODUCING_5_PHOSPHOMONOESTERS	0.261194	0.664527	0.0992333	0.376336	1.15026	38	SLX1B TATDN1 DNASE1L3	NO
GO_ENDONUCLEASE_COMPLEX	0.850769	1	0.0410713	0.258301	0.741502	28	TRMT10C ZFP36 AGO4 TSEN34 POP5 RPP25 AGO2 TARBP2 DICER1 RPP14 RPP40 ERN1	NO
GO_ENDOPEPTIDASE_ACTIVITY	0.400697	0.786903	0.0629395	0.258925	1.03007	233	CASP5 MMP14 MMP8 ATP23 GZMA PSMA4 CARD16 HP PSMA3 PRSS36 GZMH PSMA6 CTSE F12 USP12 PRSS23 CASP1 PSMA2 YBEY CLC PSMB9 C1R COPS5 GZMB LTF USP15 HGF ADAM12 USP16 CTSS CASP4 CTSL ADAM15 CTSB CTSH ADAM9 ELANE NCSTN ADAMTS5 SENP6 CTSO PRSS57 PSMB1 CASP6 CASP3 CFLAR OMA1 MME CASP8 TPP1 CFD USP1 PYCARD UQCRC2 TMEM59 NRDC ADAM20 PSMB8 CTSW PSEN1 USP25 LMLN CTSZ CTSC PMPCB ESPL1 GZMK TMPRSS9 PITRM1 ADAM10 …	NO
GO_ENDOPEPTIDASE_COMPLEX	0.150761	0.507583	0.130777	0.36501	1.24252	63	PSMA4 PSMA3 PSMA6 PSMC6 PSMA2 PSMB9 ZFAND2B PSMC2 PSMB1 ZFAND2A PSME2 PSMB8 PSME1 PSMD10 PSMA1 PSMD9 PSMB7 TXNL1 PSMF1 PSMD13 PSMB10 PSMD4 RAD23B RAD23A PSMB6 PSMB4 ECPAS PSME4 PSMB3 PSMC1 PSMD7 UCHL5 PSMC3	NO
GO_ENDOPEPTIDASE_REGULATOR_ACTIVITY	0.00197162	0.0420855	0.431708	0.468882	1.66819	86	SLPI C3 SPOCK1 CARD16 PI3 C4A CSTA CST7 SERPINI2 SERPINB1 SERPINB10 SERPINA1 SNCA PRDX5 NAIP PROS1 BIRC2 BST2 TFPI LTF GAS6 ITIH1 SERPINF2 C5 PAPLN SERPINI1	NO
GO_ENDOPLASMIC_RETICULUM_CALCIUM_ION_HOMEOSTASIS	0.998384	1	0.0359209	0.169446	0.452316	21	SELENOK GRINA TMCO1 PSEN1 TGM2 BAX HERPUD1 FIS1	NO
GO_ENDOPLASMIC_RETICULUM_EXIT_SITE	0.944625	1	0.0388759	0.233597	0.617589	20	SEC16B LRRK2 TMED5 PDCD6 YIPF5 MIA3 MIA2 SAR1B PDCD6IP SEC23A SAR1A CTAGE15	NO
GO_ENDOPLASMIC_RETICULUM_GOLGI_INTERMEDIATE_COMPARTMENT	0.230668	0.627474	0.0988903	0.309232	1.12726	106	F8 LAMP5 F5 TRAPPC2B PRRG4 SERPINA1 VMP1 CA4 ERGIC2 TAP2 UGGT2 HMGB1 TAP1 CD59 TICAM2 GORASP1 CNIH3 CD55 RAB2A TMED5 TMED7 ROBO1 KDELR1 CTSZ CTSC ANPEP CHP1 ERP44 GNPNAT1 TMED2 ATP6AP1 TAPBP SPPL3 CNIH4 SEC23IP NUCB1 MAN1A1 STK17B TGFA DICER1 CNIH1 BET1 TRAPPC5 ECPAS PTPN2	NO
GO_ENDOPLASMIC_RETICULUM_GOLGI_INTERMEDIATE_COMPARTMENT_MEMBRANE	0.0411348	0.28059	0.266351	0.430674	1.4388	59	F8 LAMP5 F5 PRRG4 SERPINA1 VMP1 ERGIC2 TAP2 TAP1 CD59 GORASP1 CNIH3 CD55 RAB2A TMED5 TMED7 ROBO1 KDELR1 CTSZ CTSC	NO
GO_ENDOPLASMIC_RETICULUM_LUMEN	0.126202	0.466188	0.133555	0.309076	1.20602	191	COL10A1 COL17A1 C3 P4HA2 IGFBP3 FKBP7 COL13A1 DBI COL11A2 C4A B2M F8 PDGFC VCAN CES1 F5 ADAMTSL4 MELTF PRSS23 SERPINA1 RCN2 UGGT2 P3H2 GAS6 DNAJC3 TSPAN5 PLAUR FUCA2 RDH5 PDGFD PTGS2 PDGFB ADAMTS5 CKAP4 TOR1A EDN1 TXNDC16 SPP1 GOLM1 IGFBP7 KTN1 TXNDC12 SHISA5 LGALS1 CST3 ARSK VCPIP1 CTSZ LAMB2 CTSC COL4A3	NO
GO_ENDOPLASMIC_RETICULUM_MANNOSE_TRIMMING	0.524752	0.863652	0.0668966	0.376223	0.947936	15	UGGT2 RNF139 RNF103 SEL1L OS9 TRIM13 EDEM2 AMFR	NO
GO_ENDOPLASMIC_RETICULUM_ORGANIZATION	0.772526	0.984483	0.0436251	0.256162	0.807378	44	SEC16B SHTN1 LNPK LRRK2 ARL6IP1 RTN3 BNIP1 RTN4 STX18 TMEM33 RAB18 RAB10 SGTA ATL2 TOR1AIP2 RAB3GAP2 CCDC47 MIA3 TMEM170A	NO
GO_ENDOPLASMIC_RETICULUM_QUALITY_CONTROL_COMPARTMENT	0.137821	0.486084	0.149208	0.483415	1.30348	22	ASGR2 FBXO6 UGGT2 RNF139 ERLEC1 RNF103 SEL1L CANX OS9 RHBDD1 TRIM13 EDEM2	NO
GO_ENDOPLASMIC_RETICULUM_SUBCOMPARTMENT	0.0710824	0.354754	0.213928	0.537785	1.43555	21	ARV1 RTN2 LNPK ASPH KPNB1 RTN4 REEP5 RAB18 RAB10	NO
GO_ENDOPLASMIC_RETICULUM_TO_CYTOSOL_TRANSPORT	0.942636	1	0.036685	0.220974	0.627022	27	YOD1 SVIP UBE2J1 ERLEC1 DERL1 SEL1L SEC61B OS9 RHBDD1 EDEM2 HERPUD1 SELENOS AUP1	NO
GO_ENDOPLASMIC_RETICULUM_TO_GOLGI_VESICLE_MEDIATED_TRANSPORT	0.190244	0.571721	0.106323	0.297222	1.15123	183	GAS1 SEC16B F8 SPTA1 CAPZA2 F5 TRAPPC2B SPTB RAB33B SERPINA1 PROS1 ERGIC2 CAPZA1 DYNC1LI1 BCAP29 GAS6 DCTN6 LRRK2 CD59 VAMP7 TICAM2 GORASP1 CNIH3 CD55 BET1L ACTR10 NAPA TMED5 RAB12 RNF139 SPAST SORL1 TMED7 VTI1B IER3IP1 SEC24D STX18 INSIG1 KDELR1 DCTN4 CTSZ TRAPPC6B CTSC SCFD1	NO
GO_ENDOPLASMIC_RETICULUM_TUBULAR_NETWORK	0.0738916	0.361635	0.2114	0.556835	1.44567	18	ARV1 LNPK ASPH KPNB1 RTN4 REEP5 RAB18 RAB10	NO
GO_ENDOPLASMIC_RETICULUM_UNFOLDED_PROTEIN_RESPONSE	0.206897	0.593123	0.204295	-0.272925	-1.12594	103	BHLHA15 DERL3 CREB3L4 WFS1 CCND1 PLA2G4B DDX11 ARFGAP1 MYDGF HSP90B1 PDIA5 LMNA CTH ASNS TSPYL2 BOK TATDN2 CUL7	NO
GO_ENDORIBONUCLEASE_ACTIVITY	0.576923	0.893436	0.0553643	0.283281	0.932408	53	RIDA RNASE2 YBEY RNASE4 LACTB2 NUDT16 SLFN14 TSNAX TSEN15 MRPL44 RNASEK RNASET2 TSEN34 POP5 RPP25 AGO2 RNASEL DBR1 RCL1 ZC3H12A RNASEH2B RNASEH2A DICER1 RPP14	NO
GO_ENDORIBONUCLEASE_ACTIVITY_PRODUCING_5_PHOSPHOMONOESTERS	0.851541	1	0.0691198	-0.24308	-0.776837	27	EDC3 DGCR8 EXO1	NO
GO_ENDOSOMAL_PART	0.3394	0.744199	0.0670513	0.253458	1.05006	430	LY96 CHMP5 HLA-DQA2 RABGEF1 B2M LAMP5 ANXA1 SORT1 TLR8 FCGR1A RPS27A FZD5 TLR4 PRLR TLR3 TBK1 TMEM165 RAB23 UBXN6 SNX10 VPS29 RAB31 MRC1 JAK2 EPHB1 LAMTOR3 SCARB2 SCAMP4 CD14 MYD88 TLR7 CCZ1B CD68 SLC11A1 MITD1 MCOLN1 SNX3 CMTM6 RAP2C LRRK2 LAMTOR5 SNX21 WASHC1 PLIN3 RILP CD1D RNF13 CTSS OPTN VAMP3 FGD2 CTSL SNX6 CTSB LAPTM4A LITAF VAMP7 TMEM9B SNX2 UBE2D3 VAMP8 RAB8B CTSH TICAM2 ANKFY1 RAB5A RAP…	NO
GO_ENDOSOMAL_TRANSPORT	0.259976	0.662783	0.0873098	0.283186	1.10181	190	CHMP5 DPY30 SORT1 RAB9B BLOC1S2 RPS27A CLTCL1 UBXN6 VPS29 ABCA1 AP5B1 CMTM6 LRRC7 LRRK2 AP1S1 WASHC1 RILP VAMP3 EVI5 PICALM SNX6 RAB6A RAB9A SNX2 ANKFY1 BET1L CHMP2B BLOC1S1 DENND5A ZFYVE16 TMEM50A SORL1 CHMP2A CHMP4A VTI1B SNX18 VPS37A VPS50 RAB11A TMEM50B ANKRD50 ALS2 WASHC4 VPS26A TBC1D17 RHOBTB3 LYST TBC1D23 LEPROT RAB29 SNX4 RAB10 VTA1 RAB14 LAPTM4B RAB8A HEATR5A VPS4B UBAP1 CORO1C VPS25 STA…	NO
GO_ENDOSOME_LUMEN	0.0781759	0.370283	0.204295	0.534783	1.41387	20	B2M PRLR JAK2 CTSS CTSL CTSB CTSH CD63	NO
GO_ENDOSOME_ORGANIZATION	0.616758	0.915686	0.0506004	0.262714	0.909395	70	CHMP5 SNX10 SCARB2 SNX3 RILP SYNJ1 CHMP2B PI4K2B CHMP2A CHMP4A VPS37A RAB27A RAB11A ALS2 WASHC4 VTA1 DNAJC13 LAPTM4B VPS4B CORO1C VPS25 STAM2 CHMP1B FASLG CHMP3 PLEKHJ1 TMEM127 RAB7A EXOC8 CHMP4B VPS33B AKTIP PLEKHF1 RAB22A USP8 STX6 VPS36 SNF8	NO
GO_ENDOSOME_TO_LYSOSOME_TRANSPORT	0.323657	0.729526	0.0852885	0.340984	1.09532	47	CHMP5 SORT1 UBXN6 RILP VAMP7 CHMP2B RAB12 KIF13A ADRB2 DENND3 LYST TRAK2 VPS4B SNAPIN SCYL2 CHMP3	NO
GO_ENDOSOME_TRANSPORT_VIA_MULTIVESICULAR_BODY_SORTING_PATHWAY	0.0214581	0.19885	0.352488	0.592991	1.61441	23	SORT1 UBXN6 RILP CHMP2B TMEM50A CHMP2A VPS37A TMEM50B LYST LEPROT LAPTM4B VPS4B VPS25 CHMP1B CHMP3	NO
GO_ENDOTHELIAL_CELL_APOPTOTIC_PROCESS	0.710448	0.957656	0.0479259	0.276552	0.845274	38	AKR1C3 FOXO3 GAS6 ICAM1 TNF CD160 PRKCI SEMA5A TNFAIP3 TEK COL4A3 MAP3K5 NFE2L2	NO
GO_ENDOTHELIAL_CELL_CHEMOTAXIS	0.620098	0.916167	0.0785029	-0.314376	-0.885247	16	FGF2 CCN3 MET HSPB1	NO
GO_ENDOTHELIAL_CELL_DEVELOPMENT	0.667732	0.940458	0.0888945	-0.239357	-0.879822	47	RAPGEF3 COL4A4 ENG FASN WNT7A MET GSTM3 PPP1R16B F2RL1 PTPRS	NO
GO_ENDOTHELIAL_CELL_MIGRATION	0.933081	1	0.027167	0.201776	0.757613	140	NRP1 ANXA3 PLPP3 ANXA1 PDCD10 PLK2 SEMA4A S100P STARD13 GLUL CYP1B1 HMGB1 PLEKHG5 ADTRP PTPRM SVBP FBXW7 KLF4 PTGS2 SASH1 GRN PDGFB PTEN EFNA1 SEMA5A EDN1 TEK AMOTL1 ROBO1 SP1 TGFBR1 SP100	NO
GO_ENDOTHELIAL_CELL_PROLIFERATION	0.440154	0.815586	0.127505	-0.246448	-0.995615	86	FGF2 LEP ATOH8 CAV2 LOXL2 FLT1 VEGFB ANG PLCG1 JUN MYDGF NRP2 RPTOR SCARB1	NO
GO_ENDOTHELIUM_DEVELOPMENT	0.844086	1	0.0351652	0.222697	0.786597	80	NRG1 NRP1 IL1B CXCL10 MARVELD2 AFDN STARD13 S1PR3 RAP2C DLL1 ICAM1 TNF SLC40A1 TNFRSF1A PDE2A RBPJ	NO
GO_ENERGY_COUPLED_PROTON_TRANSMEMBRANE_TRANSPORT_AGAINST_ELECTROCHEMICAL_GRADIENT	0.817054	0.99833	0.0432769	0.270169	0.755043	25	ATP6V1B2 MT-ND4 ATP6V1C1 ATP6V1E1 ATP6V0E1 ATP6V1F TCIRG1 ATP6V0B ATP6V0C ATP6V1A ATP6AP1	NO
GO_ENERGY_COUPLED_PROTON_TRANSPORT_DOWN_ELECTROCHEMICAL_GRADIENT	0.039755	0.276542	0.321776	0.55665	1.51547	23	ATP5PF ATP5MG ATP5F1C ATP5ME MT-ATP6 ATP5F1E ATP5PO ATP5PB MT-ATP8 ATP5F1D COX5B	NO
GO_ENERGY_DERIVATION_BY_OXIDATION_OF_ORGANIC_COMPOUNDS	0.0369089	0.270172	0.252961	0.334217	1.33174	234	NDUFB3 KL COX6C UQCRB NDUFA4 NDUFA5 PPARGC1A PCDH12 NDUFB1 PNPT1 NDUFA1 UQCRH LEPR UQCRHL TREX1 IGF2 NDUFA6 UQCRQ COX7B SNCA PPP1CB NDUFS5 NDUFA3 GYG1 MT-ND1 PRKAG2 PID1 MT-ND2 NDUFA2 NDUFS4 COQ10B COX7C SORBS1 PRELID1 COX6A1 ETFRF1 PYGL UGP2 NDUFAB1 NDUFAF2 NDUFB6 BLOC1S1 NDUFS6 MT-ND4 BID GAA PPP1R3B PPP1R3D MT-ND4L COX5B UQCRC2 NDUFB5 COA6 DLD UQCC3 SLC25A14 ME3 HIF1A SUCLG1 UQCR10 PANK2 STBD1…	NO
GO_ENERGY_HOMEOSTASIS	0.929487	1	0.0388759	0.239115	0.650985	23	PPARGC1A LEPR CD36 DLL1 METRNL OMA1 AMPD2 NR1D2 STAT3 PIK3CA PRCP	NO
GO_ENERGY_RESERVE_METABOLIC_PROCESS	0.429553	0.80591	0.120985	-0.258071	-0.99913	61	LEP NR1D1 PHKA1 GNMT IRS1 PASK PYGM KHK	NO
GO_ENHANCER_BINDING	0.617761	0.916	0.104733	-0.225581	-0.922023	89	MTA1 ELL3 NPAS2 SPIB BHLHE41 BACH2 NFATC1 RAI1 JUN LEF1 SMARCC2 SMARCB1 TCF3 HMGA1 IRF7 SMARCA4 KMT2A ACTL6A LDB1 RUVBL2 ZNF395 CHD4 TP53	NO
GO_ENSHEATHMENT_OF_NEURONS	0.104418	0.423692	0.157403	0.350884	1.25589	92	S100B NRG1 LPAR1 WASF3 EPB41L3 BCAS1 ADGRG6 B4GALT5 TENM4 TLR2 TNFRSF21 PMP22 TSPAN2 SBF2 HGF MARVELD1 KIF14 GALC PTEN PSAP XK NCSTN RNF10 B4GALT6 MPZ TNFRSF1B ACER3 PARD3 NAB1 RARA CD9 HEXB	NO
GO_ENTRAINMENT_OF_CIRCADIAN_CLOCK	0.0140799	0.156465	0.38073	-0.551981	-1.68117	22	SIK1 GNA11 MTA1 CRTC1 PER3	NO
GO_ENTRAINMENT_OF_CIRCADIAN_CLOCK_BY_PHOTOPERIOD	0.0348322	0.263802	0.321776	-0.549507	-1.58404	18	SIK1 MTA1 CRTC1 PER3	NO
GO_ENTRY_INTO_OTHER_ORGANISM_INVOLVED_IN_SYMBIOTIC_INTERACTION	0.382082	0.772483	0.0714786	0.285518	1.0415	109	GYPA CLEC4G IFITM1 IFITM2 MRC1 LGALS9 SCARB2 SLC1A5 CLEC5A CR1 CDH1 SNX3 TRIM25 DYNLT1 GAS6 FCN1 AXL ICAM1 FUCA2 CTSB VAMP8 CD55 TFRC ITGAV CD46 CCR5 LGALS1 TRIM21 PTX3 SRC ANPEP TNFRSF14 F11R	NO
GO_ENZYME_ACTIVATOR_ACTIVITY	0.130901	0.47361	0.122679	0.278357	1.15208	425	CCL8 FGF13 RCVRN FAM20A DOCK4 EFNA5 NRG1 IGFBP3 RAP1GAP NRP1 DOCK1 NPRL3 GMFG DLC1 RIN2 CHN1 SH3PXD2B ERRFI1 TIAM2 SIPA1L2 STK3 TBC1D8B MYBPC3 ARHGAP29 IGF2 PRLR TBC1D8 RIN1 CASP1 RGS18 BAD ETAA1 CKS2 SGSM1 DNAJB4 LAMTOR3 RGS2 SRGAP2 DNAJA1 STARD13 ARHGEF12 ARHGAP26 RGPD3 TANK GM2A NCF1C ATP1B3 LTF RP2 GAS6 ADAP2 PRKAG2 RGS9 LRRK2 RGS5 TBC1D12 CXCL1 EGF EVI5 DNAJC19 STARD8 CTSH RGS10 DNAJC1 PDGFB…	NO
GO_ENZYME_INHIBITOR_ACTIVITY	0.00253697	0.0509282	0.431708	0.383064	1.51084	215	RTKN RPL23 SLPI C3 CAMK2N1 RPS7 SPOCK1 RPL11 CARD16 ANXA3 PI3 C4A CSTA UMODL1 GMFG CST7 LGALS3 SERPINI2 ANXA1 SERPINB1 SERPINB10 SOCS3 SERPINA1 SNCA KAT2B PRDX5 ANXA5 NAIP PROS1 BIRC2 PPP1R17 BST2 TFPI LTF RPL5 GAS6 PRKAG2 ITIH1 SERPINF2 C5 PAPLN SERPINI1 LRRK2 DNAJC3 HEXIM2 GSKIP CDKN2D CSTB TXNIP SPRED2 IQGAP1 CASP3 SOCS1 CPEB2 PPP1R35 CDKN1C TIMP2 OAZ1 TNFSF14 CDKN2B GMFB TESC PRKAR1A CST3 FNI…	NO
GO_EPHRIN_RECEPTOR_BINDING	0.339744	0.744199	0.0880945	0.412932	1.11343	22	EFNA5 CHN1 LYN EFNA1 CDK5 CRK SRC CBL NCK1	NO
GO_EPHRIN_RECEPTOR_SIGNALING_PATHWAY	0.29275	0.69825	0.0875697	0.322078	1.1134	69	EFNA5 ARHGEF28 CHN1 ARPC3 EPHB1 LYN ARPC5 ARPC2 ITSN1 NCSTN EFNA1 AP2A1 RBPJ CRK PSEN1 SRC PSENEN CDC42 HRAS ACTR2 SDCBP APH1B NCK1 AP2M1 RAC1 PAK1 MMP9 RHOA ARPC4 ACTR3 ARPC1A	NO
GO_EPIBOLY	0.397759	0.783509	0.112379	-0.330497	-1.03703	25	CARMIL2 AJUBA CD151 WNT7A CEACAM1	NO
GO_EPIDERMAL_CELL_DIFFERENTIATION	0.775457	0.985964	0.0377705	0.23127	0.84802	113	KRT5 FOXC1 DSC2 PI3 CSTA ANXA1 ERRFI1 AKR1C3 ASAH1 PALLD CYP26B1 DLL1 ZFP36L1 CTSL KLF4 ADAM9 SHARPIN TXNIP PSAP KRT1 CASP3 ZFP36 RBPJ	NO
GO_EPIDERMAL_GROWTH_FACTOR_RECEPTOR_BINDING	0.671474	0.941624	0.0537873	0.314003	0.854866	23	PLSCR1 EGF SNX2 SNX4 CBL ARF4	NO
GO_EPIDERMAL_GROWTH_FACTOR_RECEPTOR_SIGNALING_PATHWAY	0.520107	0.860769	0.0573667	0.271951	0.968632	88	ADRA2A ERRFI1 DUSP3 REPS2 PLAUR PTK6 EGF FBXW7 SNX6 PTPN12 AFAP1L2 IQGAP1 CAMLG ITGA1 RHBDF2 PSEN1 SOCS4 SRC CDC42 EPS8 NCF1 CBL ARF4 GAB1 VPS25 PTPRJ MMP9 STAM2 ERBIN PTK2B FASLG PIK3CA RPS6KA5 SHKBP1 RASSF2	NO
GO_EPIDERMIS_DEVELOPMENT	0.233333	0.631749	0.21925	-0.239701	-1.08017	174	DSG2 WNT10A DSP COL7A1 CCN2 LAMB3 CELSR1 PERP SCRIB CERS3 WHRN GLI1 LAMA5 KRT18 FUZ ALOX15B TP63 EDAR HES1 IRF6 EVPL AQP3 FLNB NAB2 NUMA1 ERCC2 ELF3 WNT10B PPARD	NO
GO_EPITHELIAL_CELL_APOPTOTIC_PROCESS	0.281593	0.685699	0.0899861	0.322941	1.12262	72	TCF7L2 PPARGC1A SORT1 AKR1C3 STK3 BAD FOXO3 JAK2 GAS6 ICAM1 ZFP36L1 TNF CD160 PRKCI SEMA5A BID CFLAR ZFP36 TNFAIP3 TEK CAST COL4A3 MAP3K5 NFE2L2	NO
GO_EPITHELIAL_CELL_DEVELOPMENT	0.173077	0.546737	0.237794	-0.257763	-1.12281	138	SDC1 NUP210L RAPGEF3 COL4A4 SCRIB FOXJ1 WHRN WNT5B NTRK1 TFCP2L1 TP63 ESR1 SIPA1L3 FRMD6 ENG FASN WNT7A FLNB MYO1E MET GSTM3 PROX2	NO
GO_EPITHELIAL_CELL_DIFFERENTIATION	0.131957	0.47593	0.249247	-0.228563	-1.12274	362	WNT11 SDC1 NUP210L RAPGEF3 DSG2 FN3K DSP ATOH8 COL4A4 COL4A1 PERP SCRIB CERS3 FOXJ1 SERPINE1 WHRN ID3 GLI1 WNT5B CCND1 LAMA5 KRT18 ALOX15B NTRK1 TFCP2L1 TP63 DNPH1 ESR1 HES1 IRF6 CDHR2 EVPL JUN TAGLN SIPA1L3 PTK7 FRMD6 ENG FASN WNT7A AQP3 PLK4 PCK2 FLNB MYO1E MET NUMA1 ERCC2 CEACAM1 ABL1 GSTM3 PROX2 ELF3 WNT10B LEF1 AKT2 DLG5 AIMP2 PODXL KRT73 LBH MEN1 SOX8 THRA TRIM16	NO
GO_EPITHELIAL_CELL_DIFFERENTIATION_INVOLVED_IN_KIDNEY_DEVELOPMENT	0.666667	0.940424	0.0541201	0.314964	0.857482	23	STAT1 WWTR1 BASP1 PDGFB IQGAP1 ACTA2 LAMB2	NO
GO_EPITHELIAL_CELL_MORPHOGENESIS	0.772071	0.984432	0.0474483	0.285171	0.783014	24	POF1B FAT1 PALLD HRH2	NO
GO_EPITHELIAL_CELL_PROLIFERATION	0.244604	0.648803	0.245042	-0.227235	-1.0617	230	NKX3-1 FGF2 LEP ATOH8 NR1D1 CAV2 STOX1 GLI1 CCND1 LOXL2 EFNB2 PTPRK STXBP4 LIMS2 TP63 FLT1 VEGFB ESR1 IGFBP4 HES1 IRF6 FMC1 ANG EPPK1 UHRF1 PLCG1 JUN CCN3 MYDGF NRP2 HTRA1 WNT7A RPTOR SCARB1 PYGO2 MYC CEACAM1 WNT10B PPARD PRKCA LAMC1 ZNF580 NLRC3 MEN1	NO
GO_EPITHELIAL_STRUCTURE_MAINTENANCE	0.782828	0.987994	0.0681513	-0.289459	-0.80219	15	TLR9 CROCC LDB2 CXADR SRF LDB1 MKS1	NO
GO_EPITHELIAL_TO_MESENCHYMAL_TRANSITION	0.545113	0.875514	0.111011	-0.235721	-0.954469	85	WNT11 BCL9L ELL3 FUZ LOXL2 BAMBI TRIM62 ENG AXIN2 FAM83D LRP6 TRIM28 TCOF1 LEF1 DLG5 CUL7 SMAD7	NO
GO_EPITHELIAL_TUBE_MORPHOGENESIS	0.0355359	0.264183	0.321776	-0.279922	-1.27764	188	WNT11 NKX3-1 FGF2 CC2D2A COL4A1 BBS5 CELSR1 PKD1 SCRIB STOX1 LAMA5 TCAP ALOX12 FUZ EFNB2 SPRY2 DCHS1 TIMELESS ESR1 LZTS2 HES1 CSF1 KAT2A PTK7 ENG MTHFD1L LRP6 DVL2 KIF26B MET MYC ABL1 MTHFD1 KLHL3 LEF1 DLG5 PODXL SOX8 PML	NO
GO_ERAD_PATHWAY	0.53877	0.871556	0.0555947	0.268143	0.958822	91	YOD1 FBXO6 PSMC6 UBXN6 FBXO2 RNF175 UGGT2 TRIM25 TMEM67 SVIP RNFT1 UBXN8 JKAMP TOR1A SGTB RNF139 USP25 NFE2L2 UBE2J1 ERLEC1 RNF103 DNAJB14 UBXN4 DERL1 SDF2 SEL1L SGTA SEC61B OS9 RHBDD1 TRIM13 CCDC47 EDEM2 HERPUD1	NO
GO_ERBB2_SIGNALING_PATHWAY	0.128205	0.468464	0.155242	0.478184	1.30185	23	NRG1 PTK6 EGF PTPN12 SRC HSP90AA1 CUL5 GAB1 ERBIN PIK3CA CPNE3 ERBB2	NO
GO_ERBB_SIGNALING_PATHWAY	0.329442	0.734819	0.0782955	0.294552	1.07409	104	NRG1 ADRA2A ERRFI1 DUSP3 REPS2 PLAUR PTK6 EGF FBXW7 SNX6 PTPN12 AFAP1L2 RTN4 IQGAP1 RBPJ CAMLG ITGA1 RHBDF2 PSEN1 MVP SOCS4 SRC CDC42 HSP90AA1 EPS8 NCF1 CUL5 CBL ARF4 GAB1 VPS25 PTPRJ MMP9 STAM2 ERBIN MAPK1 PTK2B FASLG LGMN PIK3CA RPS6KA5 SHKBP1 RASSF2 CPNE3 ERBB2 TGFA RAB7A	NO
GO_ERK1_AND_ERK2_CASCADE	0.00404225	0.069137	0.407018	0.382419	1.48123	183	CCL8 RPS6KA6 CCL3L1 CAMK2N1 P2RY6 NRP1 IL1B ATF3 ERRFI1 PDGFC FPR2 TLR4 F2R PDGFRA CCR1 C5AR1 LGALS9 EPHB1 CD36 C3orf33 LYN DUSP3 DUSP6 HMGB1 NQO2 GAS6 SERPINF2 ICAM1 ZFP36L1 LRP1 EGF FBXW7 DUSP1 SCIMP KLF4 TNF PDGFD CTSH NOD2 PRXL2C PDGFB PTEN HAVCR2 NOTCH2 RIPK2 GLIPR2 APIP PTPN22 CFLAR TEK ITGAV SIRPA CCL4 PYCARD TNFSF11 RANBP9 RAP1B CCL5 CNKSR3 SRC NPTN PTPRC FGFR2 HMGCR HRAS PDE8A CSF1R	NO
GO_ERROR_FREE_TRANSLESION_SYNTHESIS	0.0764228	0.3673	0.206588	0.538954	1.41854	19	RPA3 RPS27A RFC4	NO
GO_ERROR_PRONE_TRANSLESION_SYNTHESIS	0.0831725	0.376995	0.287805	0.563629	1.49013	20	POLE2 RPA3 RPS27A RFC4	NO
GO_ERYTHROCYTE_DEVELOPMENT	0.0821705	0.375719	0.193813	0.484179	1.37388	27	BPGM SOX6 FAM210B RHAG TRIM58 EPB42 BCL6 FLVCR1 GATA1 ARID4A TAL1 PTBP3 JMJD6	NO
GO_ERYTHROCYTE_HOMEOSTASIS	0.0010287	0.0258452	0.45506	0.461786	1.68657	108	RPS24 RPS17 HMGB2 ISG15 MAFB RBFOX2 B2M BPGM SOX6 FAM210B FOXO3 STAT1 ALAS2 AHSP EPAS1 JAK2 LYN AXL RHAG ZFP36L1 TRIM58 EPB42 TGFBR3 MAPK14 SPI1 BCL6 CASP3 FLVCR1 ZFP36 ACVR2A GATA1 SP3 ARID4A HIF1A TAL1 KLF1 CEBPG RPS14 DYRK3 SMAP1 INHBA PTBP3	NO
GO_ER_NUCLEUS_SIGNALING_PATHWAY	0.940751	1	0.0334562	0.206188	0.650625	43	ATF3 DDIT3 EIF2A FBXW7 ATF6 TMCO1 INSIG1 BCL2L11 NFE2L2 TMEM33 NCK1 PPP1R15A ATG10 CCDC47 ATF4 HERPUD1 SELENOS PTPN2 GSK3B	NO
GO_ER_TO_GOLGI_TRANSPORT_VESICLE_MEMBRANE	0.694352	0.94919	0.0888945	-0.227713	-0.861798	54	HLA-DRB5 HLA-G HLA-DQB1 HLA-DQA1	NO
GO_ESCRT_COMPLEX	0.793798	0.991719	0.0445962	0.27537	0.769578	25	CHMP2B SPAST CHMP2A CHMP4A VPS37A UBAP1 VPS25 STAM2 CHMP1B CHMP3 CHMP4B VPS36 SNF8 UBAP1L CHMP1A	NO
GO_ESTABLISHMENT_OF_CELL_POLARITY	0.975066	1	0.0268861	0.185556	0.677704	108	FGF13 MAP1B PARD3B FRMD4A SHTN1 KIF20B EPHB1 CYP26B1 DYNLT1 NEK3 FRMD4B PRKCI RICTOR AMOTL1 CRK NDC80 FLOT2 RAP1B MARK3 PARD3 UBXN2B CDC42 HSP90AA1 RAB10 OPHN1 FAM89B DOCK8 PAK1 GSN RHOA PTK2B	NO
GO_ESTABLISHMENT_OF_ENDOTHELIAL_BARRIER	0.794562	0.991751	0.0433637	0.259757	0.782857	35	IL1B MARVELD2 AFDN S1PR3 RAP2C ICAM1 TNF TNFRSF1A PDE2A RAP1B F11R RAP1A S1PR2	NO
GO_ESTABLISHMENT_OF_EPITHELIAL_CELL_POLARITY	0.82732	1	0.0664364	-0.26121	-0.775391	20	HES1 SIPA1L3 PTK7 MYO18A CYTH3 FBF1 SH3BP1	NO
GO_ESTABLISHMENT_OF_MITOCHONDRION_LOCALIZATION	0.172757	0.546154	0.134273	0.497179	1.27587	17	MAP1B NEFL WASF1 RHOT1 SPAST KIF1B HIF1A TRAK2	NO
GO_ESTABLISHMENT_OF_MITOTIC_SPINDLE_LOCALIZATION	0.601583	0.908325	0.0840746	-0.287988	-0.905293	24	SAPCD2 SPRY2 NUMA1 SPDL1 DCTN1 SPRY1 CDK5RAP2 HTT	NO
GO_ESTABLISHMENT_OF_ORGANELLE_LOCALIZATION	0.75948	0.979356	0.0298485	0.216926	0.894233	390	AP3B2 MAP1B CHMP5 NEFL GEM PARD3B MILR1 SEC16B F8 NUSAP1 STX11 PDCD10 BLOC1S2 F5 LIN7A CENPQ UBE2B SERPINA1 SNCA P2RX7 LGALS9 SPIRE1 SLIT1 BBS7 FCER1G LYN FGR DYNLT1 KIF18A WASF1 LRRK2 TRIM58 KIF14 P2RX1 CD59 PICALM RAB6A ADGRE2 VAMP7 SPIRE2 VAMP8 AP3S1 GORASP1 CNIH3 RAB5A SYNJ1 BLOC1S6 STX3 CHMP2B CDK5 NAPA NMD3 BLOC1S1 KPNB1 AP1AR TOR1A CD300A GAB2 FMR1 RHOT1 SPAST WIPI1 KIF1B CHMP2A CHMP4A NAP…	NO
GO_ESTABLISHMENT_OF_PIGMENT_GRANULE_LOCALIZATION	0.942529	1	0.0393562	0.230767	0.599123	18	BBS7 BLOC1S6 RAB27A RAB11A RAB1A BBS4 MKKS RAB27B MYO7A DCTN2	NO
GO_ESTABLISHMENT_OF_PROTEIN_LOCALIZATION_TO_CHROMOSOME	0.983974	1	0.0362255	0.192681	0.524571	23	BRCA2 CCT2 TCP1 NIPBL POT1 SPIDR TERF1 ACD LRWD1 SGF29 CCT5 CCT6A ATR CCT7 CCT4 NABP2 CCT8 DKC1 ATM WRAP53 CCT3 RUVBL2 PIH1D1	NO
GO_ESTABLISHMENT_OF_PROTEIN_LOCALIZATION_TO_ENDOPLASMIC_RETICULUM	1.34684e-11	4.35836e-09	0.875325	0.633637	2.31348	111	RPL34 RPS24 RPL17 RPL23 RPL26 RPL7 RPL36A RPL39 RPS3A RPS7 RPS17 RPL9 RPL21 RPL11 RPS25 RPL41 RPL27 RPL31 RPL35A RPS27A RPL30 RPS20 RPL35 SRP14 SRP9 RPS18 RPL24 RPS29 RPS6 RPL5 SRP19 RPS11 RPS10 ZFAND2B RPS4Y1 RPL27A RPS12 SEC61G SGTB RPS8 SEC62 RPL15 RPL4 RPL22 CHMP4A	NO
GO_ESTABLISHMENT_OF_PROTEIN_LOCALIZATION_TO_MEMBRANE	1.15821e-06	0.000118607	0.643552	0.434631	1.75392	286	RPL34 RPS24 RPL17 RPL23 RPL26 RPL7 RPL36A RPL39 RPS3A RPS7 RPS17 RPL9 RPL21 RPL11 RPS25 RPL41 RABGEF1 RPL27 RPL31 RPL35A TIMM9 NECTIN3 RPS27A STOM RPL30 RPS20 RPL35 ROMO1 SRP14 BAD VAMP5 SRP9 RAB31 RPS18 AFDN RPL24 ATG3 PMAIP1 RPS29 RPS6 PPP3R1 GZMB RPL5 SRP19 LRRC7 RPS11 OPTN VAMP3 VAMP7 RAB8B ARL6IP1 RPS10 GORASP1 PRKCI ZFAND2B STX3 RPS4Y1 RPL27A RPS12 CDK5 TFDP1 KCNE1 RILPL2 SGTB BID TIMM10 RP…	NO
GO_ESTABLISHMENT_OF_PROTEIN_LOCALIZATION_TO_MITOCHONDRIAL_MEMBRANE	0.252874	0.659493	0.10714	0.460163	1.19469	18	TIMM9 ROMO1 TIMM10 HSP90AA1 MAIP1	NO
GO_ESTABLISHMENT_OF_PROTEIN_LOCALIZATION_TO_ORGANELLE	7.47614e-05	0.00347598	0.538434	0.35826	1.49593	486	RPL34 RANBP17 RPS24 RPL17 RPL23 RPL26 RPL7 RPL36A RPL39 RPS3A RPS7 RPS17 RPL9 TOMM7 RPL21 RPL11 RPS25 RPL41 RPL27 RPL31 RPL35A BNIP3L TIMM9 UBL5 RPS27A RPL30 RPS20 FZD5 TIMM8B FBXO7 RPL35 ROMO1 SRP14 BAD DDIT3 SIRT4 BRCA2 RAB23 SRP9 RPS18 RPL24 PMAIP1 RHOU CD36 SCARB2 DNAJA1 RPS29 RPS6 PPP3R1 ZFAND6 RGPD3 UBE2D1 GZMB CDH1 NUMB RPL5 SRP19 TIMM17A LRRC7 LRRK2 TSPAN10 NXT2 RPS11 SNUPN FBXW7 DNAJC19 …	NO
GO_ESTABLISHMENT_OF_PROTEIN_LOCALIZATION_TO_PLASMA_MEMBRANE	0.699565	0.95151	0.0473534	0.263191	0.849648	48	NECTIN3 VAMP5 RAB31 AFDN LRRC7 OPTN VAMP3 VAMP7 GORASP1 RILPL2 KIF13A ACSL3 GOLGA4 RAB11A RAB10 RAB8A BLZF1 RILPL1	NO
GO_ESTABLISHMENT_OF_PROTEIN_LOCALIZATION_TO_TELOMERE	0.943522	1	0.0398407	0.231307	0.593584	17	BRCA2 CCT2 TCP1 POT1 TERF1 ACD	NO
GO_ESTABLISHMENT_OF_PROTEIN_LOCALIZATION_TO_VACUOLE	0.525373	0.863829	0.0619763	0.314355	0.960818	38	SCARB2 VAMP7 NCOA4 TNFAIP3 ZFYVE16 SORL1 VTI1B VPS37A LAMP2 NEDD4 VPS25 GCC2 HSPA8 SMURF1 RAB7A	NO
GO_ESTABLISHMENT_OF_RNA_LOCALIZATION	0.9257	1	0.0256927	0.20068	0.774782	178	RANBP17 SARNP PNPT1 THOC7 IGF2BP2 RTRAF IGF2BP3 ZFP36L1 QKI NXT2 SNUPN SLU7 FLOT1 SSB NMD3 RBM8A MAGOH FMR1 ZFP36 ENY2 MRPL18	NO
GO_ESTABLISHMENT_OF_SPINDLE_ORIENTATION	0.0606939	0.331095	0.321776	-0.467753	-1.47038	24	SAPCD2 SPRY2 NUMA1 LLGL1 SPDL1 DCTN1 SPRY1 MAP4 CDK5RAP2 LLGL2 HTT	NO
GO_ESTABLISHMENT_OR_MAINTENANCE_OF_BIPOLAR_CELL_POLARITY	0.185294	0.564199	0.176694	-0.348711	-1.19705	35	WNT11 SCRIB FOXJ1 FSCN1 MTCL1 PTK7	NO
GO_ESTABLISHMENT_OR_MAINTENANCE_OF_CELL_POLARITY	0.796791	0.992768	0.10925	-0.200064	-0.898789	166	WNT11 KIF2C SAPCD2 FSCN2 CARMIL2 PKD1 SCRIB FOXJ1 MAP2 SPRY2 FSCN1 MTCL1 HES1 WEE1 SIPA1L3 PTK7 WNT7A KIF26B NUMA1 LMNA CCR7 DLG5 JAM3 MAP7 LLGL1 SPDL1 MYO18A CYTH3 KANK1 RHOH FBF1 DCTN1 PARD6B SPRY1 MAP4	NO
GO_ESTABLISHMENT_OR_MAINTENANCE_OF_MONOPOLAR_CELL_POLARITY	0.191919	0.572868	0.159647	-0.447026	-1.23886	15	CARMIL2 SCRIB FOXJ1 FSCN1 PTK7	NO
GO_ESTROGEN_RECEPTOR_BINDING	0.775915	0.985964	0.0448645	0.263815	0.797257	36	DNAAF4 ZNF366 PPARGC1A PADI2 WBP2 WIPI1 DCAF13 TRIP4 SRC NCOA1 NRIP1 TAF10 PPID PAGR1 ARRB1	NO
GO_EUCHROMATIN	0.105541	0.426274	0.224966	-0.418418	-1.3153	24	CBX2 DNTT TCF7 UHRF1 JUN TRIM28 DNMT3A	NO
GO_EUKARYOTIC_48S_PREINITIATION_COMPLEX	0.488449	0.843988	0.0704501	0.3876	0.976601	15	EIF3E EIF3M EIF3K EIF3L EIF3H EIF3C EIF3J EIF2S1 EIF3G EIF3D EIF3I	NO
GO_EUKARYOTIC_TRANSLATION_INITIATION_FACTOR_3_COMPLEX	0.316498	0.722251	0.0949752	0.445249	1.12743	16	COPS5 EIF3E DDX3X EIF3M EIF3K EIF3L EIF3H EIF3C EIF3J EIF3G	NO
GO_EXCITATORY_SYNAPSE	0.198653	0.581937	0.125033	0.49106	1.24343	16	NLGN4Y IGSF11 AKAP5 CYFIP1 SLC16A3 FGFR2 SYT11	NO
GO_EXCRETION	0.356201	0.757137	0.115734	-0.342813	-1.07764	24	MDK KCNK5 AQP3 ADORA2A ADORA2B	NO
GO_EXECUTION_PHASE_OF_APOPTOSIS	0.32475	0.730748	0.0843144	0.333198	1.10558	58	HMGB2 DNASE1L3 DLC1 CASP1 HMGB1 ACVR1C SHARPIN PAM16 KPNB1 BNIP1 CASP6 CASP3 CASP8	NO
GO_EXIT_FROM_MITOSIS	0.906154	1	0.0381629	0.23616	0.677942	28	RPL24 ANLN MAD2L1BP SPAST CDKN1C CHMP2A	NO
GO_EXOCRINE_SYSTEM_DEVELOPMENT	0.231928	0.630098	0.10714	0.412508	1.19951	30	FOXC1 NRP1 SEMA3A NTN4 SEMA3C IGF2 EDA POLB HGF TNF TWSG1	NO
GO_EXOCYTIC_PROCESS	0.666197	0.940424	0.048215	0.264149	0.885295	60	STX11 PLEK FCER1G LYN RALB P2RX1 VAMP3 VAMP7 EXOC6 VAMP8 RAB8B SYNJ1 BLOC1S6 STX3 STXBP3 NAPA NAPB VTI1B CTBP2 PSEN1 STXBP1 SCFD1 SNX4 RAB3D RAB10	NO
GO_EXOCYTIC_VESICLE	0.635669	0.924989	0.0457704	0.246421	0.92173	129	SLC18A1 SV2B LAMP5 RPH3A STX11 ROGDI SNCA COPS5 COPS4 LRRK2 ZNRF1 MCTP1 VAMP3 PICALM RAB6A VAMP7 RAB8B RAB5A STX3 DMXL2 NCSTN TOR1A CLTB SLC40A1 MCTP2 MME VTI1B DTNBP1 TRIM9 RAB27A PSEN1 SYNGR1 STX12 PPT1 RAB3D RAB10 SLC17A5 ADAM10 PTPRN2	NO
GO_EXODEOXYRIBONUCLEASE_ACTIVITY	0.383628	0.773759	0.0815265	0.391639	1.07535	24	TATDN1 ISG20 TREX1	NO
GO_EXOGENOUS_PROTEIN_BINDING	0.809182	0.995901	0.0401661	0.240435	0.79502	57	GYPA CLEC4G MRC1 SCARB2 SLC1A5 CLEC5A CR1 AXL ICAM1 CD55 TFRC ITGAV CD46 CCR5 ANPEP TNFRSF14 F11R	NO
GO_EXONUCLEASE_ACTIVITY	0.988889	1	0.0290688	0.181256	0.631756	75	TATDN1 ISG20 PNPT1 TREX1 APLF XRN1	NO
GO_EXONUCLEASE_ACTIVITY_ACTIVE_WITH_EITHER_RIBO_OR_DEOXYRIBONUCLEIC_ACIDS_AND_PRODUCING_5_PHOSPHOMONOESTERS	0.687055	0.946573	0.0472587	0.262973	0.864433	52	TATDN1 ISG20 PNPT1 TREX1	NO
GO_EXON_EXON_JUNCTION_COMPLEX	0.991857	1	0.0366082	0.193301	0.511054	20	RBM8A MAGOH MAGOHB SRSF1 TDRD3 PYM1 R3HCC1L	NO
GO_EXOPEPTIDASE_ACTIVITY	0.975275	1	0.0292103	0.183804	0.640323	73	MMP14 MINDY4 AGTPBP1 CTSH NUDT16 MME METAP1D TPP1 MINDY2 CTSZ ANPEP METAP2 SCRN3 CPQ NPEPPS MINDY3 NPEPL1 LTA4H CPM ZMPSTE24 AGBL5 CPVL AOPEP PRCP SCPEP1	NO
[truncated: 6,261 more rows]

## Sheet: contingency table Fisher's test
contingency table	NF-kB related	NF-kB non-related
[truncated: 2 more rows]
