# Supplementary figures and images for: Characterization of a Clinically and Biologically Defined Subgroup of Patients with Autism Spectrum Disorder and Identification of a Tailored Combination Treatment
Source: MDPI journal article supplement (doi:10.3390/biomedicines12050991), 2024-04-30

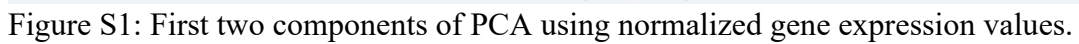

Figure S1: First two components of PCA using normalized gene expression values.

Supplement: s1 [file s1]
